# Supplementary material
Source: publisher figshare collection journal article supplement (https://gsajournals.figshare.com/ndownloader/files/15204533)
Supplement: Supplementary file 1 [file 15204533]

## Sheet: ChIP
ChIP-seq data from this study
GEO #	Data name	Strain	Stage	RNAi	Target	Antibody	Antibody type	Antigen	RRID of antibody	Matching Input name	Mapped Reads
average	H3K4me3_N2_Emb_SE180_SE255
GSM3476946	H3K4me3_N2_Emb_SE180	N2	mixed embryo	-	H3K4me3	ab12209	mouse monoclonal	Human Histone H3 aa 1-100 (tri methyl K4) conjugated to Keyhole Limpet Haemocyanin (KLH)	Abcam Cat# ab12209, RRID:AB_442957	SE176	3161648
GSM3476947	H3K4me3_N2_Emb_SE255	N2	mixed embryo	-	H3K4me3	Upstate 07-473	rabbit polyclonal	Synthetic peptide corresponding to residues surrounding and including trimethlyated Lys 4 of Histone H3	Millipore Cat# 07-473, RRID:AB_1977252	SE210	8625067
average	H3K4me3_CB428_Emb_SE175_SEA201_SE186
GSM3476948	H3K4me3_CB428_Emb_SE175	CB428 (dpy-21)	mixed embryo	-	H3K4me3	WA305-34819	mouse monoclonal	ART(me3-K)QTARKSTGC	Wako Chemicals Cat# 305-34819, RRID:AB_2616537	CJ44	8323239
GSM3476949	H3K4me3_CB428_Emb_SEA201	CB428 (dpy-21)	mixed embryo	-	H3K4me3	ab8580	rabbit polyclonal	Human Histone H3 aa 1-100 (tri methyl K4) conjugated to Keyhole Limpet Haemocyanin (KLH)	Abcam Cat# ab8580, RRID:AB_306649	SEA181	4806877
GSM3476950	H3K4me3_CB428_Emb_SE186	CB428 (dpy-21)	mixed embryo	-	H3K4me3	ab12209	mouse monoclonal	Human Histone H3 aa 1-100 (tri methyl K4) conjugated to Keyhole Limpet Haemocyanin (KLH)	Abcam Cat# ab12209, RRID:AB_442957	CJ44	4821375
average	H3K4me3_N2_Emb_ControlRNAi_LW74_LW193
GSM3476951	H3K4me3_N2_Emb_ControlRNAi_LW74	N2	mixed embryo	Vector	H3K4me3	ab8580	rabbit polyclonal	Human Histone H3 aa 1-100 (tri methyl K4) conjugated to Keyhole Limpet Haemocyanin (KLH)	Abcam Cat# ab8580, RRID:AB_306649	LW76	4814881
GSM3476952	H3K4me3_N2_Emb_ControlRNAi_LW193	N2	mixed embryo	Vector	H3K4me3	ab8580	rabbit polyclonal	Human Histone H3 aa 1-100 (tri methyl K4) conjugated to Keyhole Limpet Haemocyanin (KLH)	Abcam Cat# ab8580, RRID:AB_306649	LW205	5542486
average	H3K4me3_N2_Emb_DPY27RNAi_LW71_LW73_LW75
GSM3476953	H3K4me3_N2_Emb_DPY27RNAi_LW71	N2	mixed embryo	DPY-27	H3K4me3	ab8580	rabbit polyclonal	Human Histone H3 aa 1-100 (tri methyl K4) conjugated to Keyhole Limpet Haemocyanin (KLH)	Abcam Cat# ab8580, RRID:AB_306649	LW68	5261234
GSM3476954	H3K4me3_N2_Emb_DPY27RNAi_LW73	N2	mixed embryo	DPY-27	H3K4me3	ab8580	rabbit polyclonal	Human Histone H3 aa 1-100 (tri methyl K4) conjugated to Keyhole Limpet Haemocyanin (KLH)	Abcam Cat# ab8580, RRID:AB_306649	LW69	4833987
GSM3476955	H3K4me3_N2_Emb_DPY27RNAi_LW75	N2	mixed embryo	DPY-27	H3K4me3	ab8580	rabbit polyclonal	Human Histone H3 aa 1-100 (tri methyl K4) conjugated to Keyhole Limpet Haemocyanin (KLH)	Abcam Cat# ab8580, RRID:AB_306649	LW77	5046108
average	H3K4me1_N2_Emb_LW166_LAS53
GSM3476956	H3K4me1_N2_Emb_LW166	N2	mixed embryo	-	H3K4me1	ab8895	rabbit polyclonal	Human Histone H3 aa 1-100 (mono methyl K4) conjugated to Keyhole Limpet Haemocyanin (KLH)	Abcam Cat# ab8895, RRID:AB_306847	LW127	9194335
GSM3476957	H3K4me1_N2_Emb_LAS53	N2	mixed embryo	-	H3K4me1	ab8895	rabbit polyclonal	Human Histone H3 aa 1-100 (mono methyl K4) conjugated to Keyhole Limpet Haemocyanin (KLH)	Abcam Cat# ab8895, RRID:AB_306847	LAS70	8927447
average	H3K4me1_N2_Emb_ControlRNAi_LW171_173
GSM3476958	H3K4me1_N2_Emb_ControlRNAi_LW171	N2	mixed embryo	Vector	H3K4me1	ab8895	rabbit polyclonal	Human Histone H3 aa 1-100 (mono methyl K4) conjugated to Keyhole Limpet Haemocyanin (KLH)	Abcam Cat# ab8895, RRID:AB_306847	LW100	5526029
GSM3476959	H3K4me1_N2_Emb_ControlRNAi_LW173	N2	mixed embryo	Vector	H3K4me1	ab8895	rabbit polyclonal	Human Histone H3 aa 1-100 (mono methyl K4) conjugated to Keyhole Limpet Haemocyanin (KLH)	Abcam Cat# ab8895, RRID:AB_306847	LW180	6290224
average	H3K4me1_N2_Emb_DPY27RNAi_LW172_244
GSM3476960	H3K4me1_N2_Emb_DPY27RNAi_LW172	N2	mixed embryo	DPY-27	H3K4me1	ab8895	rabbit polyclonal	Human Histone H3 aa 1-100 (mono methyl K4) conjugated to Keyhole Limpet Haemocyanin (KLH)	Abcam Cat# ab8895, RRID:AB_306847	LW179	6143690
GSM3476961	H3K4me1_N2_Emb_DPY27RNAi_LW244	N2	mixed embryo	DPY-27	H3K4me1	ab8895	rabbit polyclonal	Human Histone H3 aa 1-100 (mono methyl K4) conjugated to Keyhole Limpet Haemocyanin (KLH)	Abcam Cat# ab8895, RRID:AB_306847	LW101	6399449
average	H3K4me1_CB428_Emb_LW161_LW164
GSM3476962	H3K4me1_CB428_Emb_LW161	CB428 (dpy-21)	mixed embryo	-	H3K4me1	ab8895	rabbit polyclonal	Human Histone H3 aa 1-100 (mono methyl K4) conjugated to Keyhole Limpet Haemocyanin (KLH)	Abcam Cat# ab8895, RRID:AB_306847	SE169	3474929
GSM3476963	H3K4me1_CB428_Emb_LW164	CB428 (dpy-21)	mixed embryo	-	H3K4me1	ab8895	rabbit polyclonal	Human Histone H3 aa 1-100 (mono methyl K4) conjugated to Keyhole Limpet Haemocyanin (KLH)	Abcam Cat# ab8895, RRID:AB_306847	LW144	4369859
average	H3_CB428_Emb_LW133_LW136
GSM3476964	H3_CB428_Emb_LW133	CB428 (dpy-21)	mixed embryo	-	H3	ab1791	Rabbit polyclonal	Human Histone H3 aa 100 to the C-terminus conjugated to Keyhole Limpet Haemocyanin (KLH)	Abcam Cat# ab1791, RRID:AB_302613	LW144	7818722
GSM3476965	H3_CB428_Emb_LW136	CB428 (dpy-21)	mixed embryo	-	H3	ab1791	Rabbit polyclonal	Human Histone H3 aa 100 to the C-terminus conjugated to Keyhole Limpet Haemocyanin (KLH)	Abcam Cat# ab1791, RRID:AB_302613	LW145	9303751
average	H3_N2_Emb_DPY27RNAi_AKM33_AKM34_LAS77
GSM3734404	H3_N2_Emb_DPY27RNAi_LAS77	N2	mixed embryo	DPY-27	H3	ab1791	Rabbit polyclonal	Human Histone H3 aa 100 to the C-terminus conjugated to Keyhole Limpet Haemocyanin (KLH)	Abcam Cat# ab1791, RRID:AB_302613	LAS79	8938755
GSM3734405	H3_N2_Emb_DPY27RNAi_AKM33	N2	mixed embryo	DPY-27	H3	ab1791	Rabbit polyclonal	Human Histone H3 aa 100 to the C-terminus conjugated to Keyhole Limpet Haemocyanin (KLH)	Abcam Cat# ab1791, RRID:AB_302613	AKM39	8730239
GSM3734406	H3_N2_Emb_DPY27RNAi_AKM34	N2	mixed embryo	DPY-27	H3	ab1791	Rabbit polyclonal	Human Histone H3 aa 100 to the C-terminus conjugated to Keyhole Limpet Haemocyanin (KLH)	Abcam Cat# ab1791, RRID:AB_302613	LAS93	10639008
average	H3K27ac_N2_Emb_LW201_LW204_LW215
GSM3476966	H3K27ac_N2_Emb_LW201	N2	mixed embryo	-	H3K27ac	ab4729	Rabbit polyclonal	Human Histone H3 aa 1-100 (acetyl K27) conjugated to Keyhole Limpet Haemocyanin (KLH)	Abcam Cat# ab4729, RRID:AB_2118291	LW180	9228616
GSM3476967	H3K27ac_N2_Emb_LW204	N2	mixed embryo	-	H3K27ac	ab4729	Rabbit polyclonal	Human Histone H3 aa 1-100 (acetyl K27) conjugated to Keyhole Limpet Haemocyanin (KLH)	Abcam Cat# ab4729, RRID:AB_2118291	LW127	6117958
GSM3476968	H3K27ac_N2_Emb_LW215	N2	mixed embryo	-	H3K27ac	ab4729	Rabbit polyclonal	Human Histone H3 aa 1-100 (acetyl K27) conjugated to Keyhole Limpet Haemocyanin (KLH)	Abcam Cat# ab4729, RRID:AB_2118291	SE346	7498542
average	H3K27ac_CB428_Emb_LW202_SEA192
GSM3476969	H3K27ac_CB428_Emb_LW202	CB428 (dpy-21)	mixed embryo	-	H3K27ac	ab4729	Rabbit polyclonal	Human Histone H3 aa 1-100 (acetyl K27) conjugated to Keyhole Limpet Haemocyanin (KLH)	Abcam Cat# ab4729, RRID:AB_2118291	LW144	6971239
GSM3476970	H3K27ac_CB428_Emb_SEA192	CB428 (dpy-21)	mixed embryo	-	H3K27ac	ab4729	Rabbit polyclonal	Human Histone H3 aa 1-100 (acetyl K27) conjugated to Keyhole Limpet Haemocyanin (KLH)	Abcam Cat# ab4729, RRID:AB_2118291	SEA181	6877035
average	H3K27ac_N2_Emb_DPY27RNAi_LW214_LW216
GSM3476971	H3K27ac_N2_Emb_DPY27RNAi_LW214	N2	mixed embryo	DPY-27	H3K27ac	ab4729	Rabbit polyclonal	Human Histone H3 aa 1-100 (acetyl K27) conjugated to Keyhole Limpet Haemocyanin (KLH)	Abcam Cat# ab4729, RRID:AB_2118291	LW179	8263197
GSM3476972	H3K27ac_N2_Emb_DPY27RNAi_LW216	N2	mixed embryo	DPY-27	H3K27ac	ab4729	Rabbit polyclonal	Human Histone H3 aa 1-100 (acetyl K27) conjugated to Keyhole Limpet Haemocyanin (KLH)	Abcam Cat# ab4729, RRID:AB_2118291	LW102	7002628
average	H4K16ac_N2_Emb_SE143_SE146_SE256
GSM3476973	H4K16ac_N2_Emb_SE143	N2	mixed embryo	-	H4K16ac	MP07329	Rabbit polyclonal	KLH-conjugated linear peptide corresponding to 10 amino acids from the N-terminal region of human Histone H4 acetylated on Lysine 16	Millipore Cat# 07-329, RRID:AB_310525	SE139	17360977
GSM3476974	H4K16ac_N2_Emb_SE146	N2	mixed embryo	-	H4K16ac	MP07329	Rabbit polyclonal	KLH-conjugated linear peptide corresponding to 10 amino acids from the N-terminal region of human Histone H4 acetylated on Lysine 16	Millipore Cat# 07-329, RRID:AB_310525	SE140	17931632
GSM3476975	H4K16ac_N2_Emb_SE256	N2	mixed embryo	-	H4K16ac	AM39167	Rabbit polyclonal	peptide including acetyl-lysine 16 of histone H4	Active Motif Cat# 39167, RRID:AB_2636968	SE210	4226633
average	H4K16ac_CB428_Emb_CJ23_LW229
GSM3476976	H4K16ac_CB428_Emb_CJ23	CB428 (dpy-21)	mixed embryo	-	H4K16ac	MP07329	Rabbit polyclonal	KLH-conjugated linear peptide corresponding to 10 amino acids from the N-terminal region of human Histone H4 acetylated on Lysine 16	Millipore Cat# 07-329, RRID:AB_310525	CJ21	16402189
GSM3476977	H4K16ac_CB428_Emb_LW229	CB428 (dpy-21)	mixed embryo	-	H4K16ac	AM39167	Rabbit polyclonal	peptide including acetyl-lysine 16 of histone H4	Active Motif Cat# 39167, RRID:AB_2636968	LW145	6371493
average	H3acetyl_N2_Emb_SE211_SE271
GSM3476978	H3ac_N2_Emb_SE211	N2	mixed embryo	-	H3ac	MP06599	Rabbit polyclonal	Linear peptide corresponding to human Histone H3 acetylated at the N-terminus	Millipore Cat# 06-599, RRID:AB_2115283	SE176	5193779
GSM3476979	H3ac_N2_Emb_SE271	N2	mixed embryo	-	H3ac	MP06599	Rabbit polyclonal	Linear peptide corresponding to human Histone H3 acetylated at the N-terminus	Millipore Cat# 06-599, RRID:AB_2115283	SE210	14391566
average	H3acetyl_CB428_Emb_LW134_LW137
GSM3476980	H3ac_CB428_Emb_LW134	CB428 (dpy-21)	mixed embryo	-	H3ac	MP06599	Rabbit polyclonal	Linear peptide corresponding to human Histone H3 acetylated at the N-terminus	Millipore Cat# 06-599, RRID:AB_2115283	LW144	6429641
GSM3476981	H3ac_CB428_Emb_LW137	CB428 (dpy-21)	mixed embryo	-	H3ac	MP06599	Rabbit polyclonal	Linear peptide corresponding to human Histone H3 acetylated at the N-terminus	Millipore Cat# 06-599, RRID:AB_2115283	LW145	9932529
average	H3K27me1_N2_Emb_LW157_LW160
GSM3476982	H3K27me1_N2_Emb_LW157	N2	mixed embryo	-	H3K27me1	AM61015	mouse monoclonal	peptide containing monomethyl Lys27 of human Histone H3	Active Motif Cat# 61015, RRID:AB_2715573	SE248	5019873
GSM3476983	H3K27me1_N2_Emb_LW160	N2	mixed embryo	-	H3K27me1	AM61015	mouse monoclonal	peptide containing monomethyl Lys27 of human Histone H3	Active Motif Cat# 61015, RRID:AB_2715573	LW127	3433942
average	H3K27me1_CB428_Emb_LW155_LW158
GSM3476984	H3K27me1_CB428_Emb_LW155	CB428 (dpy-21)	mixed embryo	-	H3K27me1	AM61015	mouse monoclonal	peptide containing monomethyl Lys27 of human Histone H3	Active Motif Cat# 61015, RRID:AB_2715573	SE169	4251522
GSM3476985	H3K27me1_CB428_Emb_LW158	CB428 (dpy-21)	mixed embryo	-	H3K27me1	AM61015	mouse monoclonal	peptide containing monomethyl Lys27 of human Histone H3	Active Motif Cat# 61015, RRID:AB_2715573	LW144	5124070
average	H3K27me1_N2_Emb_DPY27RNAi_LW170_LW243
GSM3476986	H3K27me1_N2_Emb_DPY27RNAi_LW170	N2	mixed embryo	DPY-27	H3K27me1	AM61015	mouse monoclonal	peptide containing monomethyl Lys27 of human Histone H3	Active Motif Cat# 61015, RRID:AB_2715573	LW101	6512816
GSM3476987	H3K27me1_N2_Emb_DPY27RNAi_LW243	N2	mixed embryo	DPY-27	H3K27me1	AM61015	mouse monoclonal	peptide containing monomethyl Lys27 of human Histone H3	Active Motif Cat# 61015, RRID:AB_2715573	LW179	5471142
average	H3K27me2_N2_Emb_LW212_LW227
GSM3476988	H3K27me2_N2_Emb_LW212	N2	mixed embryo	-	H3K27me2	ab24684	Rabbit polyclonal	Histone H3 aa 1-100 (N terminal) (di methyl K27) conjugated to Keyhole Limpet Haemocyanin (KLH)	Abcam Cat# ab24684, RRID:AB_448222	LW127	4195280
GSM3476989	H3K27me2_N2_Emb_LW227	N2	mixed embryo	-	H3K27me2	ab24684	Rabbit polyclonal	Histone H3 aa 1-100 (N terminal) (di methyl K27) conjugated to Keyhole Limpet Haemocyanin (KLH)	Abcam Cat# ab24684, RRID:AB_448222	SE346	4476367
average	H3K27me2_CB428_Emb_LW210_LW207
GSM3476990	H3K27me2_CB428_Emb_LW210	CB428 (dpy-21)	mixed embryo	-	H3K27me2	ab24684	Rabbit polyclonal	Histone H3 aa 1-100 (N terminal) (di methyl K27) conjugated to Keyhole Limpet Haemocyanin (KLH)	Abcam Cat# ab24684, RRID:AB_448222	LW144	3165496
GSM3476991	H3K27me2_CB428_Emb_LW207	CB428 (dpy-21)	mixed embryo	-	H3K27me2	ab24684	Rabbit polyclonal	Histone H3 aa 1-100 (N terminal) (di methyl K27) conjugated to Keyhole Limpet Haemocyanin (KLH)	Abcam Cat# ab24684, RRID:AB_448222	LW145	3486136
average	H3K27me2_N2_Emb_DPY27RNAi_LAS73_LAS86
GSM3476992	H3K27me2_N2_Emb_DPY27RNAi_LAS73	N2	mixed embryo	DPY-27	H3K27me2	ab24684	Rabbit polyclonal	Histone H3 aa 1-100 (N terminal) (di methyl K27) conjugated to Keyhole Limpet Haemocyanin (KLH)	Abcam Cat# ab24684, RRID:AB_448222	LAS79	3456519
GSM3476993	H3K27me2_N2_Emb_DPY27RNAi_LAS86	N2	mixed embryo	DPY-27	H3K27me2	ab24684	Rabbit polyclonal	Histone H3 aa 1-100 (N terminal) (di methyl K27) conjugated to Keyhole Limpet Haemocyanin (KLH)	Abcam Cat# ab24684, RRID:AB_448222	LAS93	11958663
average	H3K9me3_N2_Emb_ControlRNAi_LAS89_LAS90
GSM3476994	H3K9me3_N2_Emb_ControlRNAi_LAS89	N2	mixed embryo	Vector	H3K9me3	ab8898	Rabbit polyclonal	Human Histone H3 aa 1-100 (N terminal) (tri methyl K9) conjugated to Keyhole Limpet Haemocyanin (KLH)	Abcam Cat# ab8898, RRID:AB_306848	LAS94	18638167
GSM3476995	H3K9me3_N2_Emb_ControlRNAi_LAS90	N2	mixed embryo	Vector	H3K9me3	ab8898	Rabbit polyclonal	Human Histone H3 aa 1-100 (N terminal) (tri methyl K9) conjugated to Keyhole Limpet Haemocyanin (KLH)	Abcam Cat# ab8898, RRID:AB_306848	LAS96	17971431
average	H3K9me3_N2_Emb_DPY27RNAi_LAS72_LAS78_LAS85
GSM3476996	H3K9me3_N2_Emb_DPY27RNAi_LAS72	N2	mixed embryo	DPY-27	H3K9me3	ab8898	Rabbit polyclonal	Human Histone H3 aa 1-100 (N terminal) (tri methyl K9) conjugated to Keyhole Limpet Haemocyanin (KLH)	Abcam Cat# ab8898, RRID:AB_306848	LAS79	8689300
GSM3476997	H3K9me3_N2_Emb_DPY27RNAi_LAS78	N2	mixed embryo	DPY-27	H3K9me3	ab8898	Rabbit polyclonal	Human Histone H3 aa 1-100 (N terminal) (tri methyl K9) conjugated to Keyhole Limpet Haemocyanin (KLH)	Abcam Cat# ab8898, RRID:AB_306848	LAS79	5431677
GSM3476998	H3K9me3_N2_Emb_DPY27RNAi_LAS85	N2	mixed embryo	DPY-27	H3K9me3	ab8898	Rabbit polyclonal	Human Histone H3 aa 1-100 (N terminal) (tri methyl K9) conjugated to Keyhole Limpet Haemocyanin (KLH)	Abcam Cat# ab8898, RRID:AB_306848	LAS93	15869578
average	H4panAc_N2_Emb_SE205_SE206_LAS63
GSM3476999	H4panAc_N2_Emb_SE205	N2	mixed embryo	-	H4panAc	LP Bio AR-0109-50	Rabbit polyclonal	Peptide containing the amino terminal region of tetrahymena histone variant hv1 acetylated at multiple lysines	Lake Placid Biologicals Cat# AR-0109-50 Not registered	SE210	5385470
GSM3477000	H4panAc_N2_Emb_SE206	N2	mixed embryo	-	H4panAc	LP Bio AR-0109-50	Rabbit polyclonal	Peptide containing the amino terminal region of tetrahymena histone variant hv1 acetylated at multiple lysines	Lake Placid Biologicals Cat# AR-0109-50 Not registered	SE197	5102434
GSM3477001	H4panAc_N2_Emb_LAS63	N2	mixed embryo	-	H4panAc	AM39243	Rabbit polyclonal	amino terminal region of Tetrahymena histone H2A acetylated at multiple lysines	Active Motif Cat# 39243 Not registered	SE346	24726484
average	H4panAc_CB428_Emb_LW132_LW135
GSM3477002	H4panAc_CB428_Emb_LW132	CB428 (dpy-21)	mixed embryo	-	H4panAc	LP Bio AR-0109-50	Rabbit polyclonal	Peptide containing the amino terminal region of tetrahymena histone variant hv1 acetylated at multiple lysines	Lake Placid Biologicals Cat# AR-0109-50 Not registered	LW144	7567330
GSM3477003	H4panAc_CB428_Emb_LW135	CB428 (dpy-21)	mixed embryo	-	H4panAc	LP Bio AR-0109-50	Rabbit polyclonal	Peptide containing the amino terminal region of tetrahymena histone variant hv1 acetylated at multiple lysines	Lake Placid Biologicals Cat# AR-0109-50 Not registered	LW145	6272599
average	IgG_CB428_Emb_CJ102_SE267
GSM3477004	IgG_CB428_Emb_CJ102	CB428 (dpy-21)	mixed embryo	-	NA	ab46540	Rabbit polyclonal	Native, mouse whole IgG	Abcam Cat# ab46540, RRID:AB_2614925	CJ44	15519045
GSM3477005	IgG_CB428_Emb_SE267	CB428 (dpy-21)	mixed embryo	-	NA	ab46540	Rabbit polyclonal	Native, mouse whole IgG	Abcam Cat# ab46540, RRID:AB_2614925	SE169	6200652
average	H4K20me1_N2_Emb_ControlRNAi_LW175_LW177
GSM3477006	H4K20me1_N2_Emb_ControlRNAi_LW175	N2	mixed embryo	Vector	H4K20me1	ab9051	Rabbit polyclonal	Human Histone H4 aa 1-100 (mono methyl K20) conjugated to Keyhole Limpet Haemocyanin (KLH)	Abcam Cat# ab9051 RRID:AB_306967	LW100	3849605
GSM3477007	H4K20me1_N2_Emb_ControlRNAi_LW177	N2	mixed embryo	Vector	H4K20me1	ab9051	Rabbit polyclonal	Human Histone H4 aa 1-100 (mono methyl K20) conjugated to Keyhole Limpet Haemocyanin (KLH)	Abcam Cat# ab9051 RRID:AB_306967	LW180	4617043
average	H4K20me1_N2_Emb_DPY27RNAi_LW176_LW178
GSM3477008	H4K20me1_N2_Emb_DPY27RNAi_LW176	N2	mixed embryo	DPY-27	H4K20me1	ab9051	Rabbit polyclonal	Human Histone H4 aa 1-100 (mono methyl K20) conjugated to Keyhole Limpet Haemocyanin (KLH)	Abcam Cat# ab9051 RRID:AB_306967	LW179	1250904
GSM3477009	H4K20me1_N2_Emb_DPY27RNAi_LW178	N2	mixed embryo	DPY-27	H4K20me1	ab9051	Rabbit polyclonal	Human Histone H4 aa 1-100 (mono methyl K20) conjugated to Keyhole Limpet Haemocyanin (KLH)	Abcam Cat# ab9051 RRID:AB_306967	LW101	5488613
average	SDC3_GW638_Emb_LAS66_LAS67
GSM3477010	SDC3_GW638_Emb_LAS66	GW638 (H3K9me3 null)	mixed embryo	-	SDC-3	JL00002	Rabbit polyclonal	1067–1340 aa	Covance Research Products Inc Cat# JL00002_SDC3, RRID:AB_2616038	LAS52	14963339
GSM3477011	SDC3_GW638_Emb_LAS67	GW638 (H3K9me3 null)	mixed embryo	-	SDC-3	JL00002	Rabbit polyclonal	1067–1340 aa	Covance Research Products Inc Cat# JL00002_SDC3, RRID:AB_2616038	LAS80	15753328
average	CAPG1_GW638_Emb_LAS81_ LAS83
GSM3477012	CAPG1_GW638_Emb_LAS81	GW638 (H3K9me3 null)	mixed embryo	-	CAPG-1	Q3967	Rabbit polyclonal	1-100 aa	Novus Cat# 53230002, RRID:AB_10717928	LAS80	10645953
GSM3477013	CAPG1_GW638_Emb_LAS83	GW638 (H3K9me3 null)	mixed embryo	-	CAPG-1	Q3967	Rabbit polyclonal	1-100 aa	Novus Cat# 53230002, RRID:AB_10717928	LAS52	9132511
average	AMA1_N2_Emb_DPY27RNAi_CJ106_CJ108
GSM3477014	AMA1_N2_Emb_DPY27RNAi_CJ106	N2	mixed embryo	DPY-27	AMA-1	Q2357	Rabbit polyclonal	DLVLDVEKCKYGMEIPQNVVMGGGFYGSFAGSPSNREFSPAHSPWNSGVTPTYAGAAWSPTTGGMSPGAGFSPAGNTDGGASPFNEGGWSPASPGDPLGA	Novus Cat# 38520002, RRID:AB_10709680	CJ119	12495230
GSM3477015	AMA1_N2_Emb_DPY27RNAi_CJ108	N2	mixed embryo	DPY-27	AMA-1	Q2357	Rabbit polyclonal	DLVLDVEKCKYGMEIPQNVVMGGGFYGSFAGSPSNREFSPAHSPWNSGVTPTYAGAAWSPTTGGMSPGAGFSPAGNTDGGASPFNEGGWSPASPGDPLGA	Novus Cat# 38520002, RRID:AB_10709680	CJ120	14262676
average	RNAPolII_N2_Emb_CJ22_LW124
GSM3477016	PolII_N2_emb_CJ22	N2	mixed embryo	-	8WG16	MP17-672	Mouse monocolonal	RNA Polymerase II purified from wheat germ extract	Millipore Cat# 17-672, RRID:AB_1977470	CJ19	12519908
GSM3477017	PolII_N2_emb_LW124	N2	mixed embryo	-	8WG16	ab817	Mouse monocolonal	RNA polymerase II CTD repeat YSPTSPS. Immunogen: Wheat germ RNA Polymerase II	Abcam Cat# ab817, RRID:AB_306327	LW127	5804916
average	RNAPolII_CB428_Emb_CJ18_CJ37
GSM3477018	PolII_CB428_emb_CJ18	CB428 (dpy-21)	mixed embryo	-	8WG16	MP17-672	Mouse monocolonal	RNA Polymerase II purified from wheat germ extract	Millipore Cat# 17-672, RRID:AB_1977470	CJ21	21054385
GSM3477019	PolII_CB428_emb_CJ37	CB428 (dpy-21)	mixed embryo	-	8WG16	Covance (MMS126R)	Mouse monocolonal	RNA Polymerase II purified from wheat germ extract	Covance Research Products Inc Cat# MMS-126R, RRID:AB_10013665	CJ44	9074919
average	RNAPolII_GW638_Emb_LAS91_LAS92
GSM3477020	PolII_GW638_emb_LAS91	GW638 (H3K9me3 null)	mixed embryo	-	8WG16	ab817	Mouse monocolonal	RNA polymerase II CTD repeat YSPTSPS. Immunogen: Wheat germ RNA Polymerase II	Abcam Cat# ab817, RRID:AB_306327	LAS52	15019579
GSM3477021	PolII_GW638_emb_LAS92	GW638 (H3K9me3 null)	mixed embryo	-	8WG16	ab817	Mouse monocolonal	RNA polymerase II CTD repeat YSPTSPS. Immunogen: Wheat germ RNA Polymerase II	Abcam Cat# ab817, RRID:AB_306327	LAS80	10989269
average	CBP1_N2_Emb_LW197_SE339_BC053
GSM3477022	CBP1_N2_Emb_LW197	N2	mixed embryo	-	CBP-1	Q3582	Rabbit polyclonal	RYPYAQGGPPPGAQGMPQGYPGVSRGGPTPGQPMGRGAMMNGAMPRSGPMPTQGRPGIPPNQQAMMQPMMTDRQFMQHGQYGQQRPEFMQQYGRPGGYP	SDIX, LLC Cat# non-commercial cbp-1 modENCODE antibody 1, RRID:AB_2616359	LW127	5419348
GSM3477023	CBP1_N2_Emb_SE339	N2	mixed embryo	-	CBP-1	Q3582	Rabbit polyclonal	RYPYAQGGPPPGAQGMPQGYPGVSRGGPTPGQPMGRGAMMNGAMPRSGPMPTQGRPGIPPNQQAMMQPMMTDRQFMQHGQYGQQRPEFMQQYGRPGGYP	SDIX, LLC Cat# non-commercial cbp-1 modENCODE antibody 1, RRID:AB_2616359	SE346	7161505
GSM3477024	CBP1_N2_Emb_BC053	N2	mixed embryo	-	CBP-1	Q3582	Rabbit polyclonal	RYPYAQGGPPPGAQGMPQGYPGVSRGGPTPGQPMGRGAMMNGAMPRSGPMPTQGRPGIPPNQQAMMQPMMTDRQFMQHGQYGQQRPEFMQQYGRPGGYP	SDIX, LLC Cat# non-commercial cbp-1 modENCODE antibody 1, RRID:AB_2616359	BC032	8379552
average	CBP1_N2_Emb_DPY27RNAi_LAS87_LAS88
GSM3477025	CBP1_N2_Emb_DPY27RNAi_LAS87	N2	mixed embryo	DPY-27	CBP-1	Q3582	Rabbit polyclonal	RYPYAQGGPPPGAQGMPQGYPGVSRGGPTPGQPMGRGAMMNGAMPRSGPMPTQGRPGIPPNQQAMMQPMMTDRQFMQHGQYGQQRPEFMQQYGRPGGYP	SDIX, LLC Cat# non-commercial cbp-1 modENCODE antibody 1, RRID:AB_2616359	LAS93	17324647
GSM3477026	CBP1_N2_Emb_DPY27RNAi_LAS88	N2	mixed embryo	DPY-27	CBP-1	Q3582	Rabbit polyclonal	RYPYAQGGPPPGAQGMPQGYPGVSRGGPTPGQPMGRGAMMNGAMPRSGPMPTQGRPGIPPNQQAMMQPMMTDRQFMQHGQYGQQRPEFMQQYGRPGGYP	SDIX, LLC Cat# non-commercial cbp-1 modENCODE antibody 1, RRID:AB_2616359	LAS95	17127651
average	MDT15_N2_Emb_LW189_SE340
GSM3477027	MDT15_N2_Emb_LW189	N2	mixed embryo	-	MDT-15	Q4097	Rabbit polyclonal	657-756 aa	SDIX LLC, SDQ4097	LW127	2807129
GSM3477028	MDT15_N2_Emb_SE340	N2	mixed embryo	-	MDT-15	Q4097	Rabbit polyclonal	657-756 aa	SDIX LLC, SDQ4097	SE346	6368201
average	PQN85_N2_Emb_ControlRNAi_LW183_LW88_LW83
GSM3477029	PQN85_N2_Emb_ControlRNAi_LW183	N2	mixed embryo	Vector	PQN-85	Q4481	Rabbit polyclonal	134-233 aa	SDIX, LLC Cat# 5332.00.02, RRID:AB_2616365	LW55	4321141
GSM3477030	PQN85_N2_Emb_ControlRNAi_LW88	N2	mixed embryo	Vector	PQN-85	Q4481	Rabbit polyclonal	134-233 aa	SDIX, LLC Cat# 5332.00.02, RRID:AB_2616365	LW99	4199275
GSM3477031	PQN85_N2_Emb_ControlRNAi_LW83	N2	mixed embryo	Vector	PQN-85	Q4481	Rabbit polyclonal	134-233 aa	SDIX, LLC Cat# 5332.00.02, RRID:AB_2616365	LW89	5991586
average	PQN85_N2_Emb_DPY27RNAi_LW87_LW91_LW93
GSM3477032	PQN85_N2_Emb_DPY27RNAi_LW87	N2	mixed embryo	DPY-27	PQN-85	Q4481	Rabbit polyclonal	134-233 aa	SDIX, LLC Cat# 5332.00.02, RRID:AB_2616365	LW101	5728930
GSM3477033	PQN85_N2_Emb_DPY27RNAi_LW91	N2	mixed embryo	DPY-27	PQN-85	Q4481	Rabbit polyclonal	134-233 aa	SDIX, LLC Cat# 5332.00.02, RRID:AB_2616365	LW102	4921569
GSM3477034	PQN85_N2_Emb_DPY27RNAi_LW93	N2	mixed embryo	DPY-27	PQN-85	Q4481	Rabbit polyclonal	134-233 aa	SDIX, LLC Cat# 5332.00.02, RRID:AB_2616365	LW77	4948742
average	PHA4_OP37_Emb_ControlRNAi_LAS22_LAS23_LW106
GSM3477035	PHA4_OP37_Emb_ControlRNAi_LAS22	OP37 (PHA-4 GFP)	mixed embryo	Vector	GFP	ab290	Rabbit polyclonal	Recombinant full length protein corresponding to GFP	Abcam Cat# ab290, RRID:AB_303395	LAS58	12981511
GSM3477036	PHA4_OP37_Emb_ControlRNAi_LAS23	OP37 (PHA-4 GFP)	mixed embryo	Vector	GFP	ab290	Rabbit polyclonal	Recombinant full length protein corresponding to GFP	Abcam Cat# ab290, RRID:AB_303395	LAS60	10673456
GSM3477037	PHA4_OP37_Emb_ControlRNAi_LW106	OP37 (PHA-4 GFP)	mixed embryo	Vector	GFP	ab290	Rabbit polyclonal	Recombinant full length protein corresponding to GFP	Abcam Cat# ab290, RRID:AB_303395	LW110	2461659
average	PHA4_OP37_Emb_DPY27RNAi_LAS01_LAS08_LW107
GSM3477038	PHA4_OP37_Emb_DPY27RNAi_LAS01	OP37 (PHA-4 GFP)	mixed embryo	DPY-27	GFP	ab290	Rabbit polyclonal	Recombinant full length protein corresponding to GFP	Abcam Cat# ab290, RRID:AB_303395	LAS59	11472960
GSM3477039	PHA4_OP37_Emb_DPY27RNAi_LAS08	OP37 (PHA-4 GFP)	mixed embryo	DPY-27	GFP	ab290	Rabbit polyclonal	Recombinant full length protein corresponding to GFP	Abcam Cat# ab290, RRID:AB_303395	LAS61	8094356
GSM3477040	PHA4_OP37_Emb_DPY27RNAi_LW107	OP37 (PHA-4 GFP)	mixed embryo	DPY-27	GFP	ab290	Rabbit polyclonal	Recombinant full length protein corresponding to GFP	Abcam Cat# ab290, RRID:AB_303395	LW111	2380831
average	DPY27_15eh1_L3_SEA149_SEA151
GSM3477041	DPY27_V;X_L3_SEA149	YPT47 (X;V)	L3	-	DPY-27	JL00001	Rabbit polyclonal	1-409 aa	Covance Research Products Inc Cat# JL00001_DPY27, RRID:AB_2616039	SEA150	4733259
GSM3477042	DPY27_V;X_L3_SEA151	YPT47 (X;V)	L3	-	DPY-27	JL00001	Rabbit polyclonal	1-409 aa	Covance Research Products Inc Cat# JL00001_DPY27, RRID:AB_2616039	SEA152	4410888
average	H3K4me3_15eh1_L3_SE349_SE350
GSM3477043	H3K4me3_V;X_L3_SE349	YPT47 (X;V)	L3	-	H3K4me3	ab8580	Rabbit polyclonal	Human Histone H3 aa 1-100 (tri methyl K4) conjugated to Keyhole Limpet Haemocyanin (KLH)	Abcam Cat# ab8580, RRID:AB_306649	SEA150	9211680
GSM3477044	H3K4me3_V;X_L3_SE350	YPT47 (X;V)	L3	-	H3K4me3	ab8580	Rabbit polyclonal	Human Histone H3 aa 1-100 (tri methyl K4) conjugated to Keyhole Limpet Haemocyanin (KLH)	Abcam Cat# ab8580, RRID:AB_306649	SEA152	6406442
average	H3K27ac_15eh1_L3_SE351_SE352
GSM3477045	H3K27ac_V;X_L3_SE351	YPT47 (X;V)	L3	-	H3K27ac	ab4729	Rabbit polyclonal	Human Histone H3 aa 1-100 (acetyl K27) conjugated to Keyhole Limpet Haemocyanin (KLH)	Abcam Cat# ab4729, RRID:AB_2118291	SEA150	10428927
GSM3477046	H3K27ac_V;X_L3_SE352	YPT47 (X;V)	L3	-	H3K27ac	ab4729	Rabbit polyclonal	Human Histone H3 aa 1-100 (acetyl K27) conjugated to Keyhole Limpet Haemocyanin (KLH)	Abcam Cat# ab4729, RRID:AB_2118291	SEA152	9067301
average	IgG_N2_L3_LW187_SE268
GSM3477047	IgG_N2_L3_LW187	N2	L3	-	NA	ab46540	Rabbit polyclonal	Native, mouse whole IgG	Abcam Cat# ab46540, RRID:AB_2614925	LW192	2920473
GSM3477048	IgG_N2_L3_SE268	N2	L3	-	NA	ab46540	Rabbit polyclonal	Native, mouse whole IgG	Abcam Cat# ab46540, RRID:AB_2614925	SE245	5247135
Input-seq data from this study
GEO #	Data name	Mapped Reads
GSM3477049	CJ21	18552200
GSM3477050	CJ119	7440990
GSM3477051	CJ120	7341298
GSM3477052	LAS52	5221755
GSM3477053	LAS58	24242416
GSM3477054	LAS59	30270671
GSM3477055	LAS60	23875031
GSM3477056	LAS61	19614241
GSM3477057	LAS79	6420441
GSM3477058	LAS80	10431433
GSM3477059	LAS93	18363406
GSM3477060	LAS94	17524748
GSM3477061	LAS95	15845721
GSM3477062	LAS96	16699993
GSM3477063	LW100	10148502
GSM3477064	LW101	10673830
GSM3477065	LW102	8184574
GSM3477066	LW110	9626162
GSM3477067	LW111	12724407
GSM3477068	LW144	7295457
GSM3477069	LW145	5711890
GSM3477070	LW179	7645369
GSM3477071	LW180	8374135
GSM3477072	LW205	4355583
GSM3477073	LW55	10984021
GSM3477074	LW68	11580980
GSM3477075	LW69	2789912
GSM3477076	LW76	8567425
GSM3477077	LW77	9132662
GSM3477078	LW89	11655617
GSM3477079	LW99	11741921
GSM3477080	SE197	8402425
GSM3477081	SE248	13400169
GSM3477082	SE346	21928638
GSM3477083	SE364	14475859
GSM3477084	SEA150	6739599
GSM3477085	SEA152	4026579
GSM3477086	SEA181	12837211
GSM3477087	LAS70	16274395
Published ChIP-seq data
GEO # or modENCODE download link	Data name	Strain	Stage	Target	Antibody
GSE87741	DPY27_N2_Emb_SE30_CJ39_CJ132_SE172	N2	mixed embryo	DPY-27	JL00001
GSE67650	DPY27_N2_L3_SE262_SEA153	N2	mixed embryo	DPY-27	JL00001
GSE67650	DPY27_CB428_Emb_SE262_SEA153	CB428 (dpy-21)	mixed embryo	DPY-27	JL00001
GSE87741	SDC3_N2_Emb_SE13_SE213_SE214_SE215_LW48	N2	mixed embryo	SDC-3	JL00002
GSE45678	CAPG1_N2_Mxemb_SE61_SE62_BC001	N2	mixed embryo	CAPG-1	Q3967
GSE87741	H3K4me3_N2_Emb_SE18_SE19_SE174	N2	mixed embryo	H3K4me3	WA305-34819
GSE87741	H3_N2_Emb_SE212_SE223	N2	mixed embryo	H3	ab1791
GSE67650	H4K20me1_N2_Emb_CJ95_SE265_LW116	N2	mixed embryo	H4K20me1	ab9051
GSE45678	IgG_N2_Emb_CJ101_SE142_SE145	N2	mixed embryo	NA	ab46540
GSE45678	PQN85_N2_Emb_BC072_BC047_SE166	N2	mixed embryo	PQN-85	Q4481
GSE67650	AMA1_N2_Emb_CJ90_CJ98_LW125	N2	mixed embryo	AMA-1	Q2357
GSE67650	AMA1_CB428_Emb_CJ99_CJ105_CJ133	CB428 (dpy-21)	mixed embryo	AMA-1	Q2357
GSE89608	ATAC_EE_N2	N2	mixed-early embryo	-	-
GSE89608	ATAC_L3_N2	N2	L3	-	-
GSE97425	DNaseI_EE_N2	N2	mixed-early embryo	-	-
http://data.modencode.org/cgi-bin/findFiles.cgi?download=6218	H2AZ_N2_Emb_SE51d_SE93dd	N2	mixed embryo	H2A.Z	Kelly Lab PMID:18787694
http://data.modencode.org/cgi-bin/findFiles.cgi?download=5054	H3K27ac_L3_FE_modEN	N2	L3	H3K27ac	Wako 306-34849
http://data.modencode.org/cgi-bin/findFiles.cgi?download=5163	H3K27me3_EE_FE_modEN	N2	early embryo	H3K27me3	HK00013
http://data.modencode.org/cgi-bin/findFiles.cgi?download=5045	H3K27me3_L3_FE_modEN	N2	L3	H3K27me3	UP07449
http://data.modencode.org/cgi-bin/findFiles.cgi?download=5153	H3K9me3_EE_FE_modEN	N2	early embryo	H3K9me3	HK00009
http://data.modencode.org/cgi-bin/findFiles.cgi?download=5037	H3K9me3_L3_FE_modEN	N2	L3	H3K9me3	ab8898
http://data.modencode.org/cgi-bin/findFiles.cgi?download=3576	H3K4me3_N2_L3_modEN	N2	L3	H3K4me3	Wako 305-34819
http://data.modencode.org/cgi-bin/findFiles.cgi?download=2439	PolII_N2_L3_modEn	N2	L3	RNA Polymerase II	8WG16 Covance MMS-126R
Published Input-seq data
GEO #	Data name	Mapped Reads
GSM3477096	SE139	17119300
GSM3477097	SE140	13537477
GSM3477089	SE176	14950947
GSM3477088	CJ19	13630030
GSM3477092	CJ44	12088976
GSM3477095	SE169	11756236
GSM3477094	SE245	8540996
GSM3477090	SE210	5943920
GSM3477091	LW127	10227593
GSM3477093	LW192	5547058
GSM3477098	BC032	16596529
GSM3734407	AKM39	9147594

## Sheet: RNA
RNA-seq data from this study
GEO accession number	Description	Strain	Stage	Mapped reads
GSM3477099	SEA44 X;II_L1-3_rep1	YPT41 (X;II)	L1-L3	12345612
GSM3477100	SEA69 X;II_L1-3_rep2	YPT41 (X;II)	L1-L3	19100711
GSM3477101	SEA47 X;II_L1-3_rep3	YPT41 (X;II)	L1-L3	9124639
GSM3477102	SEA78 X;II_L1-3_rep4	YPT41 (X;II)	L1-L3	24313511
GSM3477103	SEA43 X;V_L1-3_rep1	YPT47 (aka 15eh#1) (X;V)	L1-L3	13643087
GSM3477104	SEA46 X;V_L1-3_rep2	YPT47 (aka 15eh#1) (X;V)	L1-L3	15142152
GSM3477105	SEA68 X;V_L1-3_rep3	YPT47 (aka 15eh#1) (X;V)	L1-L3	25061735
GSM3477106	SEA73 X;V_L1-3_rep4	YPT47 (aka 15eh#1) (X;V)	L1-L3	31665384
GSM3477107	SEA42 N2_L1-3_rep1	N2	L1-L3	15421467
GSM3477108	SEA45 N2_L1-3_rep2	N2	L1-L3	14086750
GSM3477109	SEA67 N2_L1-3_rep3	N2	L1-L3	19248398
GSM3477110	SEA79 N2_L1-3_rep4	N2	L1-L3	37421753
Published RNA-seq data
GEO accession number	Description	Strain	Stage	RNAi
GSE67650	N2 Emb	N2	mixed embryo	-
GSE67650	CB428 Emb	CB428 (dpy-21)	mixed embryo	-
GSE67650	N2 DPY27 RNAi Emb	N2	mixed embryo	DPY-27
GSE67650	N2 Vector RNAi Emb	N2	mixed embryo	Vector
GSE67650	N2 L3	N2	L3	-
GSE67650	CB428 L3	CB428 (dpy-21)	L3	-
GSE67650	N2 Vector RNAi L3	N2	L3	DPY-27
GSE67650	N2 DPY27 RNAi L3	N2	L3	Vector

## Sheet: Strains
strain name	strain genotype	RRID of strain
N2	wild type	RRID:WB_STRAIN:N2
CB428	dpy-21(e428) V	RRID:WB_STRAIN:CB428
YPT41	X;II	RRID:WB_STRAIN:YPT41
YPT47	X;V	RRID:WB_STRAIN:YPT47
GW638	met-2(n4256) set-25(n5021) III	RRID:WB_STRAIN:GW638

## Sheet: RNA-seq FPKMs DeSeq
Sequence_Name_Gene	Gene_WB_ID	Chrom	WS220 Start	WS220 Stop	N2_L1-3_FPKM_ave	X;II_L1-3_FPKM_ave	N2_L1-3_DESeq_normCounts_ave	X;II_L1-3_DESeq_normCounts_ave	X;II_L1-3/N2_L1-3 log2 ratio	X;II_L1-3/N2_L1-3 p value	N2_L1-3_FPKM_ave	X;V_L1-3_FPKM_ave	N2_L1-3_DESeq_normCounts_ave	X;V_L1-3_DESeq_normCounts_ave	X;V_L1-3/N2_L1-3 log2 ratio	X;V_L1-3/N2_L1-3 p value
2L52.1	WBGene00007063	chrII	1866	4663	3.22892	0.0725435	79.086	1.26509	-5.55238	2.51e-08	3.22892	3.43056	78.759	86.1635	-0.0735574	0.999975
2RSSE.1	WBGene00007064	chrII	15268135	15273238	19.3035	22.3142	446.801	379.409	0.177854	0.959966	19.3035	18.9853	446.906	449.948	0.0462883	0.999975
2RSSE.2	WBGene00044165	chrII	15274314	15275613	8.8556	10.1507	27.9893	23.1886	0.142272	0.978619	8.8556	8.59474	28.2648	26.6376	0.141613	0.999975
3R5.1	WBGene00007065	chrIII	13777588	13781032	3.5271	3.99843	53.3106	42.7944	0.096736	0.98246	3.5271	3.64361	53.0226	54.4646	0.0173625	0.999975
4R79.1	WBGene00003525	chrIV	17486945	17490461	3.8823	4.47105	68.4488	48.4207	-0.0856689	0.989474	3.8823	3.10341	68.2896	52.5589	0.433805	0.999975
4R79.2	WBGene00007067	chrIV	17480359	17483294	0.994358	1.21203	20.6509	19.7093	0.346404	0.954286	0.994358	1.26572	20.5164	28.5928	-0.422795	0.999975
6R55.2	WBGene00007069	chrX	17714379	17714756	1.58385	0.695125	3.5481	1.22625	-1.11905	NA	1.58385	0.775762	3.56575	2.23451	0.730318	0.999975
AC3.1	WBGene00005532	chrV	10368532	10369845	0.0356601	0	0.631512	0.190933	-1.31201	NA	0.0356601	0.15528	0.580931	3.37931	-2.48422	0.999975
AC3.10	WBGene00004964	chrV	10384133	10385688	0.124471	0.425817	2.9431	6.942	1.65175	0.849442	0.124471	0.106667	2.93256	2.9034	0.0704928	0.999975
AC3.2	WBGene00007070	chrV	10372117	10374238	10.6085	9.35722	311.041	194.488	-0.26369	0.957525	10.6085	10.874	311.15	328.207	-0.020919	0.999975
AC3.3	WBGene00000024	chrV	10380315	10381800	21.2992	25.3527	89.3918	118.698	0.822813	NA	21.2992	15.1134	89.6773	63.4946	0.554182	0.999975
AC3.4	WBGene00004098	chrV	10382418	10383953	18.2528	20.6699	22.2053	24.3068	0.544188	0.958598	18.2528	12.6061	22.2932	12.515	0.889023	0.999975
AC3.5	WBGene00007071	chrV	10388446	10393480	42.8705	26.5164	2965	1308.24	-0.766667	0.604536	42.8705	35.7576	2963.83	2555.25	0.270073	0.999975
AC3.6	WBGene00000724	chrV	10393507	10395209	0.234339	0.490858	3.92567	7.24109	1.297	0.945973	0.234339	0.194223	3.94871	3.70864	0.146568	0.999975
AC3.7	WBGene00007072	chrV	10395653	10397794	1.43956	0.715705	48.6197	15.7985	-1.20802	0.816257	1.43956	1.57576	48.2093	53.8608	-0.103848	0.999975
AC3.8	WBGene00007073	chrV	10398786	10401290	3.83563	2.36474	125.096	53.9098	-0.800676	0.804014	3.83563	3.519	125.417	115.3	0.177412	0.999975
AC7.1	WBGene00006428	chrIV	5112920	5122011	0.687498	0.65519	14.0513	9.81825	-0.103426	0.989474	0.687498	0.563462	14.1506	13.6989	0.102882	0.999975
AC7.2	WBGene00004929	chrIV	5126997	5145802	51.9121	48.5418	1831.48	1222.98	-0.168873	0.961304	51.9121	56.1514	1829.72	2085.52	-0.132713	0.999975
AC7.3	WBGene00014997	chrIV	5111677	5112867	0.0810602	0.669199	1.1447	5.63057	2.71204	NA	0.0810602	0.0326813	1.17163	0.343199	1.82747	0.999975
AC8.10	WBGene00043988	chrX	237495	239177	2.296	3.36729	NA	NA	NA	NA	2.296	2.61037	NA	NA	NA	NA
AC8.11	WBGene00043989	chrX	236066	236810	2.96148	4.286	NA	NA	NA	NA	2.96148	3.77969	NA	NA	NA	NA
AC8.12	WBGene00043990	chrX	239848	240779	2.37612	2.87411	NA	NA	NA	NA	2.37612	2.95258	NA	NA	NA	NA
AC8.3	WBGene00007075	chrX	228079	229761	2.296	3.36729	NA	NA	NA	NA	2.296	2.61037	NA	NA	NA	NA
AC8.4	WBGene00007076	chrX	226650	227394	2.96148	4.286	1.74066	0.477214	-1.45319	NA	2.96148	3.77969	1.75529	0.342759	2.41252	0.999975
AC8.7	WBGene00007079	chrX	230432	231363	2.37612	2.87411	NA	NA	NA	NA	2.37612	2.95258	NA	NA	NA	NA
AH10.1	WBGene00007082	chrV	14146493	14148769	0.243623	0.95179	11.196	22.7844	1.4388	NA	0.243623	0.362792	11.1952	15.104	-0.375968	0.999975
AH10.2	WBGene00007083	chrV	14156815	14157607	0.115538	0	2.0156	0.190934	-2.98632	NA	0.115538	0.037477	1.90149	0.694167	1.50985	0.999975
AH10.3	WBGene00007084	chrV	14144014	14145396	4.48468	4.34484	34.4047	22.4825	-0.200065	0.981634	4.48468	3.44246	34.8221	27.226	0.411092	0.999975
AH10.4	WBGene00007085	chrV	14137332	14137845	0.531987	0.426592	0.204022	0.53123	1.79435	NA	0.531987	0.415037	0.204042	0.343882	-0.696972	0.999975
AH6.1	WBGene00001528	chrII	9512430	9516877	0.0137652	0.0355143	0.934431	1.81816	1.37405	NA	0.0137652	0.0366265	0.93338	2.53454	-1.38511	0.999975
AH6.10	WBGene00005032	chrII	9548345	9549639	0.0979906	0.129319	2.1202	1.98393	0.317896	NA	0.0979906	0.253624	2.19992	5.70618	-1.319	0.999975
AH6.11	WBGene00005033	chrII	9544625	9546148	0.0416688	0.0501697	0.710669	0.62789	0.235069	NA	0.0416688	0.0201769	0.709387	0.460157	0.68052	0.999975
AH6.12	WBGene00005034	chrII	9537668	9539025	0	0	NA	NA	NA	NA	0	0	NA	NA	NA	NA
AH6.14	WBGene00005035	chrII	9532238	9533914	0	0	NA	NA	NA	NA	0	0.0101166	0.204042	0.343882	-0.696972	0.999975
AH6.2	WBGene00007080	chrII	9517508	9518837	0.0987819	0.424874	2.63748	5.52704	1.48108	0.945973	0.0987819	0.272758	2.58188	5.97301	-1.15396	0.999975
AH6.3	WBGene00007081	chrII	9519036	9520151	0.657797	1.12335	11.5783	9.87145	0.183641	NA	0.657797	0.298146	11.6324	4.69812	1.36407	0.999975
AH6.4	WBGene00005027	chrII	9520140	9521611	0	0.0525053	0.204022	0.708174	2.20911	NA	0	0.0524924	0.204044	1.00723	-2.24738	0.999975
AH6.5	WBGene00003231	chrII	9524112	9526307	79.3433	24.5674	4130.48	624.071	-2.31279	NA	79.3433	67.9368	4149.28	3217.17	0.423146	NA
AH6.6	WBGene00005028	chrII	9528719	9529802	0	0	0.328122	0.190932	-0.367436	NA	0	0	0.328338	0.203769	0.744321	0.999975
AH6.7	WBGene00005029	chrII	9539210	9540763	0	0.0399859	0.204022	0.519977	1.76346	NA	0	0.01897	0.204043	0.45836	-1.11154	0.999975
AH6.8	WBGene00005030	chrII	9541540	9542825	0.0158349	0.0324982	0.44513	0.314794	-0.0860845	NA	0.0158349	0.076694	0.450007	1.84249	-1.97756	0.999975
AH9.1	WBGene00014998	chrX	2243225	2247000	0.830284	1.4191	24.7553	31.0041	0.738452	0.915525	0.830284	1.07823	24.9624	34.1905	-0.397765	0.999975
AH9.2	WBGene00000797	chrX	2255839	2258073	2.85191	2.30937	75.276	32.9971	-0.776115	0.947937	2.85191	2.77575	75.586	67.8594	0.211645	NA
AH9.3	WBGene00014999	chrX	2259143	2260518	7.35905	10.4214	121.547	125.307	0.457686	0.891445	7.35905	7.14609	121.279	119.296	0.0798616	0.999975
AH9.4	WBGene00015000	chrX	2271016	2274329	0.718034	0.733713	16.4148	13.6199	0.144451	0.985519	0.718034	0.93692	16.4643	23.5801	-0.462152	0.999975
AH9.6	WBGene00044701	chrX	2263167	2267464	4.94069	6.02325	91.8072	90.5956	0.394567	0.952509	4.94069	7.21135	91.5369	140.776	-0.564907	0.999975
AH9.7	WBGene00175029	chrX	2243144	2244459	0.329466	0.679512	5.34449	6.86037	0.773969	0.945973	0.329466	0.413081	5.33193	7.05514	-0.347942	0.999975
B0001.1	WBGene00003010	chrIV	12129481	12135073	63.1843	71.3857	1150.76	879.223	0.0254546	0.991345	63.1843	74.4165	1152.38	1339.93	-0.161463	0.999975
B0001.2	WBGene00007087	chrIV	12146458	12150953	5.04519	4.73211	341.434	170.82	-0.585391	NA	5.04519	4.72481	342.563	304.552	0.225755	NA
B0001.3	WBGene00007088	chrIV	12143408	12145709	11.6114	12.0377	442.89	314.44	-0.0804297	0.982686	11.6114	11.4416	443.701	437.042	0.07789	0.999975
B0001.4	WBGene00007089	chrIV	12135057	12137325	35.009	28.0946	838.078	402.825	-0.643195	NA	35.009	34.6084	840.307	785.381	0.153599	NA
B0001.5	WBGene00007090	chrIV	12141137	12143309	12.1816	15.0448	468.698	383.118	0.122864	0.976137	12.1816	13.2242	469.556	508.907	-0.0600309	0.999975
B0001.6	WBGene00007091	chrIV	12156815	12164252	54.9348	68.8661	2328.76	2104.3	0.267516	0.945973	54.9348	54.7343	2328.67	2433.13	-0.00723387	0.999975
B0001.7	WBGene00007092	chrIV	12150035	12154220	4.89377	3.50319	391.327	143.775	-1.03083	NA	4.89377	4.88579	392.967	358.438	0.188759	NA
B0001.8	WBGene00007093	chrIV	12138822	12141036	7.41223	9.56856	251.003	202.842	0.106387	0.98246	7.41223	8.58935	251.426	294.271	-0.170936	0.999975
B0019.1	WBGene00000138	chrI	12759575	12764950	15.6354	19.0723	722.946	646.727	0.253004	0.945973	15.6354	13.687	724.29	642.29	0.229417	0.999975
B0019.2	WBGene00007094	chrI	12773646	12782247	7.05194	7.65235	373.725	244.264	-0.199801	0.976137	7.05194	7.46884	374.714	380.861	0.0325998	0.999975
B0024.1	WBGene00000722	chrV	10291670	10292843	449.208	193.116	8015.42	2673.61	-1.17025	0.650712	449.208	381.551	8017.52	6862.61	0.280475	0.999975
B0024.10	WBGene00007100	chrV	10315224	10317371	13.5908	12.0526	548.158	292.666	-0.491602	0.952509	13.5908	13.3916	549.518	534.944	0.0948524	NA
B0024.11	WBGene00007101	chrV	10317464	10319509	9.01293	9.81024	326.862	240.511	-0.0288462	0.991345	9.01293	10.8147	326.757	395.261	-0.218512	0.999975
B0024.12	WBGene00001646	chrV	10319508	10320161	14.7708	12.6854	126.234	83.0307	-0.190653	0.959966	14.7708	14.9037	126.13	131.998	-0.00952956	0.999975
B0024.13	WBGene00007102	chrV	10320689	10322190	30.2601	20.2064	690.126	255.384	-1.02046	NA	30.2601	35.5008	692.352	757.244	-0.0731768	NA
B0024.14	WBGene00007103	chrV	10322261	10332087	17.4465	16.6236	901.905	650.716	-0.0572114	0.98904	17.4465	16.1603	900.961	840.639	0.156053	0.999975
B0024.15	WBGene00007104	chrV	10289695	10291685	1.41395	0.625868	26.6806	9.27852	-1.11009	0.945973	1.41395	1.24657	26.7287	28.1611	-0.0192426	0.999975
B0024.2	WBGene00000723	chrV	10293492	10294596	9.03247	14.3367	161.815	198.596	0.709224	0.945973	9.03247	9.55546	162.024	174.567	-0.051496	0.999975
B0024.3	WBGene00007096	chrV	10287538	10289247	1.51573	1.61662	21.4154	16.4812	0.035905	0.992577	1.51573	1.72745	21.3498	24.861	-0.163588	0.999975
B0024.4	WBGene00007097	chrV	10297373	10298957	2.85623	0.88355	79.8712	15.0609	-1.99314	0.838851	2.85623	1.71827	79.7744	47.7805	0.79558	0.999975
B0024.6	WBGene00001533	chrV	10308265	10314343	0.15625	0.228188	10.4367	10.8715	0.472628	0.954286	0.15625	0.315587	10.4981	23.2588	-1.09157	0.999975
B0024.8	WBGene00000491	chrV	10299447	10307329	2.55517	2.43863	192.861	139.745	-0.0510364	0.990966	2.55517	2.00569	192.591	158.39	0.338131	0.999975
B0024.9	WBGene00007099	chrV	10314615	10315751	23.1946	29.0988	408.421	379.111	0.306298	0.945973	23.1946	23.3586	408.527	420.711	0.0136776	0.999975
B0025.1	WBGene00006932	chrI	6028487	6033460	14.3817	14.1672	809.46	567.338	-0.0990155	0.959966	14.3817	15.9085	809.231	904.561	-0.104593	0.999975
B0025.2	WBGene00000814	chrI	6022658	6026983	24.9539	23.1639	788.118	484.797	-0.287298	0.958598	24.9539	27.6805	788.208	883.425	-0.108456	0.999975
B0025.4	WBGene00015001	chrI	6027193	6028373	26.2932	19.1841	168.554	73.5238	-0.78319	0.945973	26.2932	28.9815	168.633	179.401	-0.0332291	0.999975
B0025.5	WBGene00194700	chrI	6024152	6024957	7.78906	8.90067	28.5272	16.3761	-0.387015	NA	7.78906	10.3144	28.7063	33.7385	-0.176952	NA
B0034.1	WBGene00015002	chrII	5970079	5972638	7.96557	12.9661	127.762	168.28	0.81114	0.898891	7.96557	10.2964	127.549	173.431	-0.387232	0.999975
B0034.2	WBGene00015003	chrII	5944170	5944343	0	0	NA	NA	NA	NA	0	0	NA	NA	NA	NA
B0034.3	WBGene00000403	chrII	5945380	5956660	133.715	173.544	6643.14	5713.28	0.19619	0.958783	133.715	158.559	6637.52	7806.31	-0.177922	0.999975
B0034.4	WBGene00015004	chrII	5968109	5969033	0.392223	1.04938	6.23221	9.62917	1.0414	0.945973	0.392223	0.299123	6.2507	4.32401	0.587722	0.999975
B0034.5	WBGene00015005	chrII	5972830	5974952	0.664725	0.821259	12.6158	11.6675	0.301001	0.959966	0.664725	0.798261	12.4818	15.4061	-0.2476	0.999975
B0034.7	WBGene00044394	chrII	5961651	5961975	34.3118	27.8941	58.2637	36.073	-0.277943	0.959966	34.3118	18.1141	58.3629	31.5803	0.9421	0.999975
B0035.1	WBGene00007105	chrIV	11310949	11312475	55.8356	48.6761	1328.63	790.642	-0.335112	0.952509	55.8356	58.4835	1331.36	1374.49	0.0100745	0.999975
B0035.10	WBGene00001919	chrIV	11326534	11327321	3.16871	3.82694	1.66811	3.1563	1.33375	NA	3.16871	3.88093	1.54649	2.69506	-0.745245	0.999975
B0035.11	WBGene00007110	chrIV	11327591	11329349	20.9872	20.1231	582.785	389.818	-0.166427	0.954892	20.9872	20.4597	583.25	568.12	0.0939927	0.999975
B0035.12	WBGene00007111	chrIV	11329443	11332922	16.4782	14.3749	1048.81	581.42	-0.437366	0.945973	16.4782	16.0794	1050.73	1001.67	0.125063	0.999975
B0035.13	WBGene00007112	chrIV	11304698	11306698	40.1765	36.8851	683.12	452.554	-0.180314	0.959966	40.1765	33.1991	683.104	577.855	0.297473	0.999975
B0035.14	WBGene00001019	chrIV	11298985	11304765	37.4196	36.3798	1235.55	757.346	-0.292398	0.945973	37.4196	33.5118	1237.03	1153.61	0.156797	0.999975
B0035.15	WBGene00007113	chrIV	11296968	11298397	16.4761	10.4952	335.193	152.006	-0.727132	0.349568	16.4761	13.972	334.998	288.371	0.272298	0.999975
B0035.16	WBGene00007114	chrIV	11295125	11296867	2.04646	1.79694	45.8297	26.2172	-0.392033	0.955021	2.04646	1.3576	45.5294	29.6853	0.673125	0.999975
B0035.18	WBGene00044290	chrIV	11320297	11320621	18.9234	24.0282	53.6316	39.1971	-0.0386046	NA	18.9234	24.786	53.9575	57.8147	-0.0435364	NA
B0035.2	WBGene00001020	chrIV	11312450	11313960	21.2737	13.393	322.887	155.618	-0.639287	0.315931	21.2737	17.2158	323.035	275.522	0.285599	0.999975
B0035.3	WBGene00007106	chrIV	11314054	11315028	18.3764	17.1335	295.449	166.755	-0.411446	0.954286	18.3764	20.3517	296.311	316.34	-0.0382886	0.999975
B0035.4	WBGene00007107	chrIV	11315182	11315855	61.932	44.4271	447.563	232.136	-0.533383	0.527745	61.932	64.0442	447.905	472.107	-0.0198449	0.999975
B0035.5	WBGene00007108	chrIV	11317394	11319928	29.1077	18.2013	933.535	403.312	-0.797074	0.45269	29.1077	23.6199	934.708	782.29	0.312887	0.999975
B0035.6	WBGene00007109	chrIV	11320777	11323614	8.2916	8.80381	534.409	304.559	-0.397486	NA	8.2916	9.17547	536.452	553.807	0.0101407	NA
B0035.7	WBGene00001921	chrIV	11323862	11324448	9.94792	9.27247	1.21026	5.10188	2.48944	NA	9.94792	9.36519	1.20093	2.16028	-0.790995	0.999975
B0035.8	WBGene00001922	chrIV	11324696	11325200	26.0348	22.8207	4.07163	4.33873	0.505402	0.963718	26.0348	29.4164	4.07564	3.30406	0.358859	0.999975
B0035.9	WBGene00001920	chrIV	11325995	11326307	4.53282	7.50973	NA	NA	NA	NA	4.53282	5.10081	NA	NA	NA	NA
B0041.1	WBGene00015006	chrI	4664499	4665349	0.144142	0.044005	1.75821	0.314796	-2.06788	NA	0.144142	0.0795445	1.70682	1.06568	0.735619	0.999975
B0041.2	WBGene00015007	chrI	4653471	4660152	93.3306	84.9348	5125.04	2724.88	-0.497633	0.945973	93.3306	95.299	5129.62	5181.03	0.0416876	0.999975
B0041.3	WBGene00015008	chrI	4644437	4645627	9.38388	8.887	105.149	71.0305	-0.15219	0.958652	9.38388	10.8455	104.994	125.059	-0.19622	0.999975
B0041.4	WBGene00004415	chrI	4645636	4646966	3528.18	4750.02	62706.8	64706.2	0.459017	0.945973	3528.18	4552.99	62710.4	84100	-0.367326	0.999975
B0041.5	WBGene00015009	chrI	4648269	4650771	22.7214	16.5371	724.335	344.684	-0.657646	0.92862	22.7214	20.3345	725.736	636.75	0.244792	0.999975
B0041.6	WBGene00015010	chrI	4652143	4652907	21.9628	28.4416	99.8711	97.0057	0.371737	0.945973	21.9628	26.5341	99.9695	126.481	-0.283292	0.999975
B0041.7	WBGene00006961	chrI	4665744	4671739	20.7305	16.804	1990.88	1082.38	-0.465464	0.945973	20.7305	18.4722	1991.26	1804.19	0.198398	0.999975
B0041.8	WBGene00015011	chrI	4647309	4648279	9.35528	11.2381	141.001	93.5146	-0.178705	0.9772	9.35528	10.3254	141.348	131.542	0.159799	0.999975
B0047.1	WBGene00015012	chrII	2040275	2041620	0.131492	0.378247	2.8096	4.90488	1.21759	NA	0.131492	0.18241	2.83581	3.60086	-0.288508	0.999975
B0047.2	WBGene00015013	chrII	2043027	2044109	0.393914	0.694177	6.79223	8.44801	0.728462	0.945973	0.393914	0.570931	6.76732	9.72214	-0.466615	0.999975
B0047.3	WBGene00015014	chrII	2044628	2046589	0.441124	0.464226	9.95558	7.7904	0.059927	0.991095	0.441124	0.578107	9.94741	12.9961	-0.329606	0.999975
B0047.4	WBGene00015015	chrII	2045967	2046661	0.0157129	0.0133854	0.35076	0.314793	0.257655	NA	0.0157129	0.0250182	0.350432	0.203769	0.838272	0.999975
B0198.1	WBGene00006646	chrX	12031377	12033969	3.40097	2.49024	102.068	51.0941	-0.58457	0.898891	3.40097	2.90073	101.899	87.8547	0.270023	0.999975
B0198.2	WBGene00007115	chrX	12028642	12031549	4.91896	5.46054	108.146	97.6797	0.266884	0.954286	4.91896	4.86556	108.028	117.583	-0.0662081	0.999975
B0198.3	WBGene00007116	chrX	12042547	12049279	3.38941	3.44601	252.684	173.94	-0.125006	0.970371	3.38941	3.32895	253.053	252.907	0.0569116	0.999975
B0205.1	WBGene00015017	chrI	10713438	10718190	5.80182	5.4613	354.655	190.517	-0.482761	0.953771	5.80182	6.76774	355.472	395.952	-0.099515	NA
B0205.10	WBGene00015024	chrI	10708351	10710364	2.85165	6.01343	108.419	113.123	0.475008	NA	2.85165	2.53341	108.883	88.2864	0.358597	NA
B0205.11	WBGene00015025	chrI	10732530	10733674	47.1346	37.7044	779.574	427.037	-0.454591	0.945973	47.1346	45.1088	779.939	743.959	0.124214	0.999975
B0205.12	WBGene00044413	chrI	10730455	10730701	157.869	168.094	305.148	173.563	-0.400317	0.945973	157.869	99.4363	305.773	282.728	0.16912	0.999975
B0205.13	WBGene00044644	chrI	10727739	10728784	6.59117	3.98361	33.8985	16.6705	-0.610187	0.945973	6.59117	5.8906	34.1166	30.9306	0.197514	0.999975
B0205.14	WBGene00044646	chrI	10726906	10727340	1.50598	2.30801	2.43323	2.43046	0.412091	NA	1.50598	1.96235	2.3777	2.64697	-0.0986991	0.999975
B0205.2	WBGene00015018	chrI	10724149	10726125	0	0.0984359	0.674465	1.06123	1.06766	NA	0	0.124063	0.676995	2.60736	-1.8893	0.999975
B0205.3	WBGene00004466	chrI	10730717	10732437	61.1503	56.361	1456.39	962.889	-0.18322	0.945973	61.1503	59.8686	1456.08	1448.24	0.0638608	0.999975
B0205.4	WBGene00015019	chrI	10741357	10744432	2.31432	1.54561	55.3732	26.9537	-0.624969	0.945973	2.31432	2.08226	55.163	51.0656	0.167423	0.999975
B0205.5	WBGene00015020	chrI	10740206	10740579	0	0	0.328123	0.314793	0.353903	NA	0	0.204521	0.328339	0.331133	0.0438514	0.999975
B0205.6	WBGene00015021	chrI	10736685	10739900	26.3829	25.0007	661.185	474.944	-0.0635622	0.987584	26.3829	32.0756	660.866	823.373	-0.261115	0.999975
B0205.7	WBGene00002191	chrI	10734010	10736610	262.895	226.903	8162.94	4445.91	-0.462876	0.945973	262.895	244.684	8176.65	7243.79	0.23084	0.999975
B0205.8	WBGene00015022	chrI	10728883	10730226	37.9891	37.8681	258.244	182.12	-0.0901106	0.978619	37.9891	38.4084	257.968	262.623	0.0302739	0.999975
B0205.9	WBGene00015023	chrI	10720814	10723580	6.11911	8.08609	257.744	209.849	0.117149	0.984051	6.11911	7.14935	258.134	296.014	-0.141475	0.999975
B0207.1	WBGene00015026	chrI	5965063	5967213	0.711584	0.622852	32.0849	14.4109	-0.741006	NA	0.711584	0.392879	32.3251	16.1557	1.05668	NA
B0207.10	WBGene00015033	chrI	5959009	5959528	11.7262	10.2711	17.3139	11.9528	-0.120843	0.989474	11.7262	13.0443	17.3516	21.3554	-0.243452	0.999975
B0207.11	WBGene00015034	chrI	5962953	5964128	0.0912083	0.260062	1.39497	2.3983	1.19551	NA	0.0912083	0.156109	1.25246	2.17261	-0.73859	0.999975
B0207.12	WBGene00000232	chrI	5967252	5973322	7.15504	5.33891	165.917	100.231	-0.313399	0.956249	7.15504	6.43547	166.006	160.859	0.101517	0.999975
B0207.2	WBGene00015027	chrI	5955031	5956885	1.30686	1.69161	13.8648	13.3463	0.358751	0.957633	1.30686	1.49988	13.8421	17.1119	-0.249869	0.999975
B0207.3	WBGene00001676	chrI	5942420	5945539	1.75375	1.2618	35.3682	20.5231	-0.371473	0.959913	1.75375	2.18213	35.3106	46.7521	-0.348855	0.999975
B0207.4	WBGene00000099	chrI	5937478	5938887	15.9188	15.4857	378.568	212.874	-0.416819	NA	15.9188	17.636	379.719	403.289	-0.0308085	NA
B0207.5	WBGene00015028	chrI	5919788	5935418	0.0361458	0.0246128	8.91063	4.02607	-0.732421	0.945973	0.0361458	0.0508045	8.76106	13.0656	-0.520525	0.999975
B0207.6	WBGene00015029	chrI	5935371	5936946	8.79171	8.91737	162.622	100.728	-0.277328	0.970046	8.79171	9.67915	162.803	175.145	-0.0493481	0.999975
B0207.7	WBGene00015030	chrI	5945758	5947344	0.0761884	0.530293	1.63682	6.92944	2.49558	0.945973	0.0761884	0.11075	1.56553	2.61531	-0.684253	0.999975
B0207.8	WBGene00015031	chrI	5951137	5951744	0	0	NA	NA	NA	NA	0	0	NA	NA	NA	NA
B0207.9	WBGene00015032	chrI	5957461	5958361	0.187943	0.991954	1.35191	3.91888	1.94918	NA	0.187943	0.488733	1.36054	3.44333	-1.28354	0.999975
B0212.1	WBGene00015035	chrIV	3572466	3577625	1.71942	1.31544	61.2577	34.6944	-0.406455	0.945973	1.71942	1.18366	60.9043	42.7603	0.566347	0.999975
B0212.2	WBGene00015036	chrIV	3565196	3567810	0.22593	0.408344	4.56614	6.02051	0.812646	0.945973	0.22593	0.215357	4.62315	4.98824	-0.0535803	0.999975
B0212.3	WBGene00015037	chrIV	3540183	3543598	1.28422	1.58905	45.064	31.2033	-0.116543	0.987254	1.28422	1.39565	45.0356	47.6447	-0.0251759	0.999975
B0212.4	WBGene00015038	chrIV	3543623	3547596	1.58787	1.70057	38.553	30.8789	0.0935145	0.984051	1.58787	1.72372	38.7377	42.8742	-0.0902974	0.999975
B0212.5	WBGene00003889	chrIV	3550883	3557427	2.90801	2.91569	170.347	128.86	0.0110618	0.996419	2.90801	3.14243	170.165	191.334	-0.113084	0.999975
B0212.6	WBGene00044111	chrIV	3570714	3571642	2.51079	2.44392	13.3405	9.92622	-0.0127654	0.997611	2.51079	1.36153	13.2935	7.91274	0.804545	0.999975
B0213.10	WBGene00015040	chrV	3955750	3957700	0.486609	1.25357	14.4131	26.4601	1.29018	0.650712	0.486609	0.626452	14.4575	18.4079	-0.292431	0.999975
B0213.11	WBGene00015041	chrV	3958223	3961174	0.921218	1.10949	25.8212	22.5784	0.220126	0.959966	0.921218	0.684756	25.8224	19.6141	0.452806	0.999975
B0213.12	WBGene00015042	chrV	3961744	3963800	0.172034	0.710153	5.18259	13.3141	1.77495	0.609008	0.172034	0.253366	5.23582	7.47062	-0.456739	0.999975
B0213.14	WBGene00015043	chrV	3964763	3967856	5.85255	11.1481	182.101	254.308	0.895572	0.434125	5.85255	6.68459	181.999	213.864	-0.176694	0.999975
B0213.15	WBGene00015044	chrV	3968117	3970499	12.2747	31.3204	239.177	351.955	0.971048	0.675431	12.2747	16.3634	238.965	328.005	-0.400842	0.999975
B0213.16	WBGene00015045	chrV	3970696	3972986	0.226934	1.1902	6.36319	23.7347	2.31291	0.156871	0.226934	0.588568	6.39846	17.3495	-1.38302	0.999975
B0213.17	WBGene00015046	chrV	3978810	3979119	91.3003	1301.55	129.633	1541.95	3.98599	2.28e-06	91.3003	125.845	129.561	185.037	-0.458107	0.999975
B0213.2	WBGene00003765	chrV	3989075	3989755	109.372	288.508	993.102	2018.03	1.43667	0.595851	109.372	117.72	994.693	1017.81	0.0229356	0.999975
B0213.3	WBGene00003766	chrV	3987884	3988302	28.3218	135.138	61.9162	246.215	2.40526	NA	28.3218	46.434	62.4437	96.3935	-0.570305	0.999975
B0213.4	WBGene00003767	chrV	3984397	3984834	222.296	979.085	598.992	2124.46	2.24023	0.0135726	222.296	344.82	597.944	923.736	-0.571396	0.999975
B0213.5	WBGene00003768	chrV	3981964	3982730	14.6299	54.4812	158.622	450.529	1.91976	0.025233	14.6299	17.7629	158.423	191.865	-0.220237	0.999975
B0213.6	WBGene00003769	chrV	3980039	3980614	98.0454	292.538	509.47	1220.53	1.67417	0.300852	98.0454	107.999	509.207	576.779	-0.123691	0.999975
B0213.7	WBGene00006142	chrV	3977248	3978796	0.0366558	0	0.631513	0.190933	-1.31201	NA	0.0366558	0.0250767	0.62627	0.546214	0.253392	0.999975
B0213.8	WBGene00006141	chrV	3974645	3976249	0	0	NA	NA	NA	NA	0	0.0951885	0.204044	1.93555	-3.18971	0.999975
B0213.9	WBGene00006274	chrV	3954023	3955445	0.0074418	0.0225625	0.328123	0.314793	0.353903	NA	0.0074418	0.0111296	0.32834	0.502406	-0.557587	0.999975
B0218.1	WBGene00015047	chrIV	8159343	8162028	31.7118	43.3547	966.51	990.109	0.448538	0.945973	31.7118	36.9147	965.698	1189.87	-0.245086	0.999975
B0218.2	WBGene00015048	chrIV	8152428	8154845	28.0898	24.959	979.097	649.431	-0.178542	0.972136	28.0898	25.7759	977.845	937.971	0.116137	0.999975
B0218.3	WBGene00004055	chrIV	8148779	8150727	16.2238	18.5215	321.245	266.427	0.143797	0.959966	16.2238	18.406	321.22	372.258	-0.156665	0.999975
B0218.5	WBGene00015049	chrIV	8155236	8156433	0.224036	0.682222	5.37119	9.49011	1.23492	0.945973	0.224036	0.230122	5.26316	5.12353	0.0948681	0.999975
B0218.6	WBGene00015050	chrIV	8161737	8163781	5.53133	5.53792	120.76	84.3901	-0.103263	0.980453	5.53133	4.714	121.204	104.537	0.269494	0.999975
B0218.7	WBGene00015051	chrIV	8164579	8166064	1.17353	2.12798	32.106	28.4468	0.239162	NA	1.17353	0.797963	32.2402	19.8865	0.753149	NA
B0218.8	WBGene00015052	chrIV	8167148	8168760	18.9393	34.2711	310.942	435.231	0.89887	0.857199	18.9393	66.6404	310.655	1118.61	-1.79225	0.650636
B0222.1	WBGene00015053	chrV	9134276	9135553	7.47186	11.5476	133.059	164.998	0.724118	0.945973	7.47186	10.9448	133.102	203.257	-0.554697	0.999975
B0222.10	WBGene00015058	chrV	9158360	9159515	0.159609	0.0569473	1.80983	1.18847	-0.19301	NA	0.159609	0.159884	1.83474	2.06247	-0.112724	0.999975
B0222.11	WBGene00044582	chrV	9165796	9168018	1.74984	1.99077	37.6907	30.6624	0.115999	0.976446	1.74984	2.16092	37.6521	46.1477	-0.237453	0.999975
B0222.2	WBGene00015054	chrV	9135633	9137696	0	0.138047	0.20402	2.49726	4.02729	NA	0	0.00644643	0.204042	0.331132	-0.642465	0.999975
B0222.3	WBGene00015055	chrV	9138927	9141375	1.39289	2.64958	42.8578	57.3215	0.833251	0.407181	1.39289	1.3226	42.9193	41.9382	0.0894364	0.999975
B0222.4	WBGene00006418	chrV	9144592	9146877	1.87525	5.71995	62.3492	131.641	1.49189	0.604536	1.87525	1.17794	62.7681	40.3912	0.692064	0.999975
B0222.5	WBGene00015056	chrV	9152298	9154850	12.4672	18.1846	379.18	388.661	0.449367	0.945973	12.4672	13.1418	379.604	397.016	-0.00862852	0.999975
B0222.6	WBGene00000717	chrV	9159618	9160640	3550.17	4111.23	3836.79	3571.59	0.3104	0.955159	3550.17	4724.35	3834.9	4617.38	-0.211811	0.999975
B0222.7	WBGene00000718	chrV	9162027	9162982	981.367	1193.11	1074.42	733.089	-0.137765	0.985168	981.367	1320.41	1075.42	1637.59	-0.550607	0.999975
B0222.8	WBGene00000599	chrV	9164271	9165284	4072.09	4780.51	11503.8	12458.6	0.528775	0.945973	4072.09	5440.76	11503.6	15371.4	-0.362081	0.999975
B0222.9	WBGene00015057	chrV	9168368	9173001	4.79772	8.34476	373.675	450.69	0.684084	0.681797	4.79772	5.93571	373.749	467.307	-0.266225	0.999975
B0228.1	WBGene00015059	chrII	7755955	7756856	18.3843	15.7177	208.961	127.586	-0.298032	0.954286	18.3843	23.525	208.587	275.31	-0.344329	0.999975
B0228.4	WBGene00015061	chrII	7724849	7752673	38.3598	27.1162	8652.28	3529.43	-0.879911	0.701341	38.3598	30.1279	8641.11	6349.45	0.500659	0.999975
B0228.5	WBGene00015062	chrII	7752516	7753554	0.803958	1.67454	6.97775	10.2772	0.972345	0.945973	0.803958	0.753655	6.90492	6.06991	0.242025	0.999975
B0228.6	WBGene00015063	chrII	7754514	7755104	5.59184	6.63248	32.0564	27.5665	0.196036	0.976137	5.59184	8.95061	32.04	52.6812	-0.661341	0.999975
B0228.7	WBGene00015064	chrII	7757134	7758387	50.581	58.4889	724.932	635.806	0.224476	0.956905	50.581	46.1047	724.681	685.423	0.136426	0.999975
B0228.8	WBGene00015065	chrII	7759657	7761488	0.0489829	0.0113211	1.08578	0.314796	-1.37251	NA	0.0489829	0.0222769	1.08701	0.791913	0.513031	0.999975
B0228.9	WBGene00015066	chrII	7762009	7763617	0.0315235	0	0.703312	0.314795	-0.746019	NA	0.0315235	0.0427839	0.69737	1.00691	-0.473858	0.999975
B0238.1	WBGene00015067	chrV	5240753	5243120	5.03466	7.60077	150.621	166.732	0.560337	0.917324	5.03466	7.59333	150.11	230.6	-0.563302	0.999975
B0238.10	WBGene00015074	chrV	5274057	5275546	113.71	146.943	1714.91	1603.15	0.316507	0.915411	113.71	99.1041	1715.11	1485.75	0.263181	0.999975
B0238.11	WBGene00015075	chrV	5269466	5270728	58.1249	51.4552	1283.58	735.876	-0.388903	0.945973	58.1249	60.7899	1286.14	1297.5	0.0433778	0.999975
B0238.12	WBGene00015076	chrV	5267805	5268807	9.32987	26.706	91.0508	205.445	1.58774	0.439911	9.32987	14.0637	90.7975	141.526	-0.584266	0.999975
B0238.13	WBGene00015077	chrV	5243712	5248024	0.392666	0.865509	0.898252	5.06827	2.91003	NA	0.392666	0.650588	0.895408	1.90215	-1.03094	0.999975
B0238.15	WBGene00044537	chrV	5240172	5240435	0.473338	0	0.802304	0.190933	-1.65734	NA	0.473338	0.26749	0.768665	1.10359	-0.465704	0.999975
B0238.3	WBGene00015068	chrV	5250587	5252100	0.0556515	0.0205711	0.703312	0.314795	-0.746019	NA	0.0556515	0.0248194	0.699528	0.634516	0.196801	0.999975
B0238.5	WBGene00015069	chrV	5256125	5257407	0	0	NA	NA	NA	NA	0	0.0245019	0.204043	0.502404	-1.2439	0.999975
B0238.6	WBGene00015070	chrV	5258019	5259532	0.0843904	0.0606423	1.34414	0.91358	-0.143345	NA	0.0843904	0.0552205	1.28128	1.11866	0.251897	0.999975
B0238.7	WBGene00015071	chrV	5260315	5263083	0.00436385	0.0067075	0.328123	0.314793	0.353903	NA	0.00436385	0.0159636	0.328536	0.722489	-1.08085	0.999975
B0238.8	WBGene00015072	chrV	5263934	5265760	0.0802646	0.0176905	1.21977	0.314795	-1.54039	NA	0.0802646	0.0489315	1.23621	1.05862	0.279826	0.999975
B0238.9	WBGene00015073	chrV	5275532	5278290	22.9964	8.73985	1353.53	254.802	-1.99554	NA	22.9964	20.7298	1359.53	1117.45	0.33897	NA
B0240.1	WBGene00004359	chrV	11727879	11730142	2.63719	1.709	66.1157	31.6653	-0.648357	0.945973	2.63719	2.36017	66.1357	64.5444	0.0912125	0.999975
B0240.2	WBGene00007117	chrV	11733525	11736950	0.0784492	0.140482	4.06275	4.8029	0.655184	0.968669	0.0784492	0.0427658	3.96968	2.1714	0.926475	0.999975
B0240.3	WBGene00000907	chrV	11718070	11725634	0.631853	0.502295	47.2256	27.32	-0.375875	0.947937	0.631853	0.734605	47.1271	57.3614	-0.227449	0.999975
B0240.4	WBGene00007118	chrV	11730973	11733461	26.9391	18.2791	1258.36	488.798	-0.950498	NA	26.9391	27.6431	1262.47	1217.56	0.108329	NA
B0244.10	WBGene00015085	chrIII	5733950	5737469	0.742972	0.215633	36.4755	6.6357	-2.04487	0.497827	0.742972	0.610149	36.1572	28.1735	0.41602	0.999975
B0244.11	WBGene00015086	chrIII	5767836	5768620	0.0504451	0	0.512287	0.190933	-1.01015	NA	0.0504451	0	0.511474	0.20377	1.38379	0.999975
B0244.2	WBGene00002048	chrIII	5755492	5765769	133.371	214.08	6438.71	8045.91	0.735218	0.870705	133.371	161.414	6431.87	8174.3	-0.289782	0.999975
B0244.4	WBGene00015079	chrIII	5747438	5751562	0.0756908	0.0442179	1.41342	0.517239	-1.03655	NA	0.0756908	0.0351195	1.42455	0.892427	0.730778	0.999975
B0244.5	WBGene00015080	chrIII	5744832	5747149	0.230747	0.291299	6.39163	4.77797	-0.00605303	0.998565	0.230747	0.424499	6.47419	10.2982	-0.61355	0.999975
B0244.6	WBGene00015081	chrIII	5737961	5744774	0.342526	0.148308	21.1443	6.98937	-1.1833	0.730043	0.342526	0.278965	21.076	18.5635	0.239208	0.999975
B0244.7	WBGene00015082	chrIII	5731454	5732808	0.26808	0.0442179	6.8371	0.7281	-2.81744	NA	0.26808	0.077075	6.90883	3.38705	1.08449	0.999975
B0244.8	WBGene00015083	chrIII	5728131	5730348	39.6808	30.7122	1937.45	734.259	-0.986061	NA	39.6808	43.0774	1946.06	1917.33	0.0775289	NA
B0244.9	WBGene00015084	chrIII	5730073	5730965	0.168041	0.548297	1.79685	3.30601	1.29335	NA	0.168041	0.109587	1.73668	1.01202	0.83517	0.999975
B0250.1	WBGene00004413	chrV	20479655	20480815	6473.24	7425.78	33812.3	30203	0.250882	0.945973	6473.24	5132.29	33821.3	28808.8	0.287497	0.999975
B0250.10	WBGene00007127	chrV	20487613	20489171	0	0	NA	NA	NA	NA	0	0.0279103	0.204043	0.546255	-1.36463	0.999975
B0250.2	WBGene00007119	chrV	20476716	20479058	6.36871	8.32321	81.7866	85.8388	0.4835	0.945973	6.36871	3.78014	81.7313	51.9658	0.7094	0.999975
B0250.4	WBGene00007121	chrV	20458622	20464455	2.28604	2.74832	63.8902	57.8164	0.269617	0.954286	2.28604	0.984329	63.9529	31.1516	1.09378	0.34542
B0250.5	WBGene00007122	chrV	20493892	20497315	99.9527	117.152	1871.19	1692.98	0.269349	0.954286	99.9527	55.2722	1871.15	1060.29	0.875536	0.00589873
B0250.6	WBGene00007123	chrV	20490739	20492454	0	0	NA	NA	NA	NA	0	0	NA	NA	NA	NA
B0250.8	WBGene00007125	chrV	20469671	20470454	0.39294	0.139997	5.39141	1.05772	-1.93597	NA	0.39294	0.228051	5.393	2.62097	1.09706	0.999975
B0250.9	WBGene00007126	chrV	20480760	20485354	8.78292	13.4032	184.255	212.835	0.621771	0.945973	8.78292	4.9062	184.151	110.004	0.799407	0.999975
B0252.1	WBGene00015087	chrII	6919686	6923621	1.06097	0.372317	50.6117	11.8608	-1.67954	0.782778	1.06097	0.532224	50.4479	25.7061	1.02876	0.999975
B0252.2	WBGene00000211	chrII	6910027	6912653	2.97272	4.84762	99.3306	120.777	0.695776	0.790773	2.97272	3.64318	99.1846	127.236	-0.303246	0.999975
B0252.3	WBGene00015088	chrII	6902825	6907713	5.91457	3.22593	173.129	63.9561	-1.02296	0.816257	5.91457	5.69648	173.322	173.24	0.0567526	0.999975
B0252.4	WBGene00000886	chrII	6912497	6913321	12.8006	12.0159	84.0054	48.4242	-0.38102	0.952818	12.8006	11.3687	84.1578	71.3245	0.294774	0.999975
B0252.5	WBGene00015089	chrII	6916948	6918878	0.474794	1.11683	11.4316	18.0888	1.07581	0.945973	0.474794	0.386717	11.1719	8.2874	0.48696	0.999975
B0252.8	WBGene00044615	chrII	6916111	6916923	28.5273	20.0225	65.6376	31.9014	-0.627169	0.945973	28.5273	28.1569	65.7531	66.0421	0.0497484	0.999975
B0261.1	WBGene00015091	chrI	5263696	5268387	16.5431	19.2635	930.373	713.772	0.0313884	0.990966	16.5431	16.6216	931.74	921.388	0.0721943	0.999975
B0261.2	WBGene00002583	chrI	5245742	5263429	19.5109	13.352	3582.72	1640.75	-0.712966	0.849442	19.5109	16.4222	3584.48	3129.55	0.251886	0.999975
B0261.4	WBGene00015092	chrI	5244285	5245526	54.4086	59.4612	600.161	492.007	0.127065	0.957525	54.4086	57.781	599.899	639.934	-0.0371279	0.999975
B0261.5	WBGene00015093	chrI	5249774	5250440	0.0807117	0.454188	0.766408	2.90466	2.33592	NA	0.0807117	0.0456112	0.766115	0.541164	0.55757	0.999975
B0261.6	WBGene00015094	chrI	5255449	5256926	1.19224	4.15771	11.3227	21.5236	1.34044	NA	1.19224	1.7743	11.394	14.2149	-0.263051	0.999975
B0261.7	WBGene00015095	chrI	5269546	5270937	16.5689	16.2177	456.697	241.422	-0.505947	NA	16.5689	15.6216	458.58	399.715	0.254278	NA
B0261.8	WBGene00015096	chrI	5271279	5272040	28.2873	18.7299	286.57	132.939	-0.694387	0.724564	28.2873	25.0787	286.76	247.73	0.267146	0.999975
B0261.9	WBGene00195057	chrI	5268421	5269466	0	0.0438257	0.204021	0.314792	1.03942	NA	0	0.155611	0.204044	1.18134	-2.4774	0.999975
B0272.1	WBGene00006538	chrX	9434392	9436834	7.40679	10.4958	202.693	225.818	0.569598	0.945973	7.40679	7.0575	202.527	201.141	0.0659838	0.999975
B0272.2	WBGene00007128	chrX	9440338	9441505	5.24878	5.16298	65.2199	42.8462	-0.19241	0.959966	5.24878	6.32528	65.1888	75.7205	-0.159985	0.999975
B0272.3	WBGene00007129	chrX	9431365	9432689	123.752	136.255	2098.3	1804.3	0.195951	0.961368	123.752	110.6	2098.5	1910.51	0.19148	0.999975
B0272.4	WBGene00007130	chrX	9428371	9430264	16.6116	33.2748	228.662	337.473	0.975294	0.576245	16.6116	17.9753	228.437	255.762	-0.106931	0.999975
B0273.1	WBGene00015097	chrIV	5493985	5495241	0.886061	1.95952	13.3792	16.6617	0.730279	0.954286	0.886061	1.10474	13.4655	15.8221	-0.17659	0.999975
B0273.2	WBGene00004243	chrIV	5486675	5490322	36.2056	21.8999	165.925	84.7426	-0.555634	NA	36.2056	35.275	166.685	188.461	-0.121066	NA
B0273.3	WBGene00015098	chrIV	5484036	5486201	1.20287	1.95065	17.5598	11.2544	-0.22806	0.982554	1.20287	1.32532	17.6698	13.4824	0.446286	0.999975
B0273.4	WBGene00006745	chrIV	5495656	5516256	7.17798	7.78627	421.529	335.44	0.0841566	0.977621	7.17798	7.28976	421.15	438.521	-0.00223727	0.999975
B0280.1	WBGene00015099	chrIII	7133726	7136401	14.7574	13.6509	286.885	197.054	-0.128152	0.954286	14.7574	13.7356	286.903	276.603	0.10882	0.999975
B0280.10	WBGene00015105	chrIII	7131971	7133616	2.844	2.39364	66.2592	35.3857	-0.49122	0.954286	2.844	3.29872	66.1669	75.3968	-0.132319	0.999975
B0280.11	WBGene00015106	chrIII	7136445	7138216	0.191143	0.30732	6.87338	5.63864	0.128061	0.993677	0.191143	0.242397	6.86879	7.52756	-0.0760531	0.999975
B0280.12	WBGene00001613	chrIII	7138620	7144770	1.44717	0.90474	78.9842	36.3145	-0.707282	0.945973	1.44717	1.15643	79.1604	67.7236	0.281194	0.999975
B0280.13	WBGene00015107	chrIII	7128836	7131986	11.4929	8.99234	246.257	137.886	-0.422958	0.945973	11.4929	8.3731	246.54	190.026	0.431698	0.999975
B0280.17	WBGene00044674	chrIII	7134959	7136065	0.520641	2.47442	10.9302	26.3273	1.68198	NA	0.520641	0.631853	10.8881	12.5876	-0.153172	0.999975
B0280.2	WBGene00015100	chrIII	7124601	7128320	1.59437	0.993487	20.4659	6.1012	-1.33232	0.810621	1.59437	1.29544	20.6362	16.1417	0.410463	0.999975
B0280.3	WBGene00015101	chrIII	7123061	7124270	60.8916	57.8146	1114.04	725.486	-0.205043	0.958598	60.8916	67.4292	1115.22	1210.37	-0.0620507	0.999975
B0280.4	WBGene00003845	chrIII	7108259	7109248	2.65212	1.39485	31.455	11.3147	-1.06136	0.857487	2.65212	2.52273	31.4514	31.7077	0.0443646	0.999975
B0280.5	WBGene00015102	chrIII	7102023	7103930	258.815	139.47	12089.7	3183.75	-1.51124	NA	258.815	293.387	12144.3	12480.8	0.0166443	NA
B0280.7	WBGene00015103	chrIII	7110240	7111811	9.44005	4.37753	179.429	61.9815	-1.11977	0.787274	9.44005	5.79641	179.369	116.994	0.672572	0.999975
B0280.8	WBGene00003609	chrIII	7112236	7115378	15.4158	17.3551	413.642	332.628	0.0992594	0.98111	15.4158	17.9029	413.007	503.316	-0.229223	0.999975
B0280.9	WBGene00015104	chrIII	7120841	7122833	19.3869	19.1801	558.052	356.61	-0.232318	0.958598	19.3869	21.4896	559.547	603.756	-0.0536303	0.999975
B0281.1	WBGene00015108	chrII	2313071	2314932	0	0.052422	0.204021	0.314792	1.03942	NA	0	0.020493	0.204042	0.331132	-0.642465	0.999975
B0281.3	WBGene00015110	chrII	2307045	2308356	7.15861	6.65229	134.412	91.7641	-0.136924	0.967469	7.15861	6.13441	134.797	118.458	0.242487	0.999975
B0281.4	WBGene00015111	chrII	2297851	2298798	0.230803	0.329852	3.4133	2.40916	-0.0889049	NA	0.230803	0.03363	3.42838	0.34389	3.37358	0.999975
B0281.5	WBGene00015112	chrII	2299844	2300887	1.88694	2.00522	25.1712	16.3714	-0.206857	NA	1.88694	2.45072	25.2309	35.2843	-0.427759	NA
B0281.6	WBGene00015113	chrII	2301312	2302234	0.339524	0.330711	3.99186	2.69895	-0.150929	NA	0.339524	0.57538	3.9961	6.52145	-0.650527	0.999975
B0281.8	WBGene00015114	chrII	2311494	2312852	0	0.00973688	NA	NA	NA	NA	0	0.0117477	0.204042	0.331132	-0.642465	0.999975
B0284.1	WBGene00007131	chrIII	4376474	4379172	0.878153	1.17885	28.928	27.3358	0.332061	0.954286	0.878153	1.3903	28.8923	47.1885	-0.651677	0.999975
B0284.2	WBGene00007132	chrIII	4381710	4384113	0.469261	1.15371	11.6302	22.1499	1.34316	0.569986	0.469261	0.713525	11.7054	19.092	-0.649713	0.999975
B0284.3	WBGene00007133	chrIII	4379339	4381013	8.92766	9.71114	76.8811	61.8894	0.100797	0.976137	8.92766	9.86206	77.0212	86.2771	-0.107647	0.999975
B0284.4	WBGene00007134	chrIII	4384758	4387729	0.0969314	0.037235	1.99571	0.639553	-1.22803	NA	0.0969314	0.122095	2.02902	2.78309	-0.399828	0.999975
B0285.1	WBGene00007135	chrIII	4333368	4340455	51.5177	23.9353	3050.79	797.783	-1.52138	NA	51.5177	40.7571	3060.75	2275.85	0.483553	NA
B0285.10	WBGene00000513	chrIII	4370856	4372792	0.447644	0.377341	8.13699	5.48967	-0.154042	0.989836	0.447644	0.610352	8.19445	11.8395	-0.47481	0.999975
B0285.3	WBGene00007136	chrIII	4341656	4343308	10.0455	9.61582	195.215	124.134	-0.239431	0.961885	10.0455	8.95159	195.599	169.235	0.264944	0.999975
B0285.4	WBGene00007137	chrIII	4343432	4345194	14.5517	17.1903	300.141	249.762	0.148647	0.960854	14.5517	18.3592	300.396	379.723	-0.282009	0.999975
B0285.5	WBGene00002003	chrIII	4345308	4350051	17.2864	8.11027	913.879	240.136	-1.51442	NA	17.2864	13.7217	916.969	683.388	0.480243	NA
B0285.6	WBGene00007138	chrIII	4352217	4355860	1.11996	1.15067	34.3643	25.9837	0.0104269	0.997611	1.11996	1.04645	34.2865	34.8163	0.0339549	0.999975
B0285.7	WBGene00007139	chrIII	4356510	4364944	18.3867	16.3296	1018.97	670.519	-0.19003	0.957633	18.3867	16.5114	1019.1	953.012	0.152811	0.999975
B0285.8	WBGene00000511	chrIII	4365346	4367441	4.00467	2.74846	89.6615	45.4584	-0.566206	0.852123	4.00467	4.17478	89.6973	94.121	-0.0133762	0.999975
B0285.9	WBGene00000512	chrIII	4367803	4370132	4.31197	2.40291	106.075	39.7329	-1.00294	0.620065	4.31197	5.95204	106.121	149.343	-0.436841	0.999975
B0286.1	WBGene00015115	chrII	4378658	4386355	11.424	16.5103	192.423	208.1	0.52673	0.916816	11.424	11.0481	192.659	187.903	0.0921331	0.999975
B0286.2	WBGene00002252	chrII	4359085	4368285	3.02233	3.29313	228.833	196.318	0.192634	0.962306	3.02233	3.21865	228.753	248.446	-0.0630684	0.999975
B0286.3	WBGene00015116	chrII	4369628	4372572	25.1336	17.0305	703.24	341.569	-0.628106	0.869206	25.1336	21.2552	703.892	611.825	0.25831	0.999975
B0286.4	WBGene00003825	chrII	4372743	4376745	131.681	114.737	3535.47	2074.56	-0.355364	0.945973	131.681	123.137	3540.66	3181.49	0.210391	0.999975
B0286.5	WBGene00001438	chrII	4379885	4383290	2.40976	3.39026	60.1298	47.0753	0.0606249	0.993677	2.40976	2.10294	60.4752	42.9746	0.548933	NA
B0286.6	WBGene00023425	chrII	4368493	4447363	0.0438733	0.122715	1.04427	2.5767	1.71676	NA	0.0438733	0.0915392	1.04478	5.13569	-2.24128	0.999975
B0294.1	WBGene00015117	chrX	1896656	1897337	143.389	194.486	1201.52	1276.49	0.501055	0.945973	143.389	150.509	1201.16	1284.5	-0.0407095	0.999975
B0294.3	WBGene00015118	chrX	1892180	1893266	0	0	NA	NA	NA	NA	0	0	NA	NA	NA	NA
B0302.1	WBGene00002207	chrX	17186065	17193219	19.3815	17.5193	1533.83	969.848	-0.247574	0.949699	19.3815	18.815	1535.81	1583.41	0.0120405	0.999975
B0302.2	WBGene00015119	chrX	17178464	17178918	0.15204	0.798217	0.693617	2.21643	2.08976	NA	0.15204	0.0488198	0.692905	0.720499	-0.000265754	0.999975
B0302.4	WBGene00015121	chrX	17176415	17176703	0.51651	1.96973	0.639623	1.00574	1.06669	NA	0.51651	0.48016	0.635715	0.343294	0.94501	0.999975
B0302.5	WBGene00015122	chrX	17193223	17195044	50.9635	61.5383	624.867	510.507	0.122116	0.977519	50.9635	62.9962	626.171	764.142	-0.231209	0.999975
B0303.11	WBGene00015131	chrIII	8703225	8710031	13.0279	9.49659	765.509	394.278	-0.543471	0.834912	13.0279	12.9217	764.767	786.032	0.0165068	0.999975
B0303.14	WBGene00015132	chrIII	8713907	8716103	2.50778	2.50857	75.6396	53.9552	-0.0736443	0.984242	2.50778	2.64288	75.5744	82.8698	-0.0768732	0.999975
B0303.15	WBGene00015133	chrIII	8717560	8718486	85.3337	63.5033	907.652	495.477	-0.459587	0.884591	85.3337	83.466	907.591	901.281	0.0661387	0.999975
B0303.16	WBGene00044678	chrIII	8705029	8706266	0.276402	0.294082	4.14699	3.16063	0.0218807	NA	0.276402	0.350817	4.1414	5.64605	-0.391049	0.999975
B0303.2	WBGene00015124	chrIII	8684726	8686400	7.68769	4.22426	122.836	50.5854	-0.8662	0.842596	7.68769	7.0397	123.134	116.222	0.139414	0.999975
B0303.3	WBGene00015125	chrIII	8686036	8688396	118.142	132.489	3964.01	3258.81	0.131119	0.961368	118.142	99.5991	3962.83	3586.2	0.200152	0.999975
B0303.4	WBGene00015126	chrIII	8689768	8693393	26.0237	25.4124	1257.46	747.377	-0.33687	0.950129	26.0237	25.737	1258.82	1246.08	0.0707479	0.999975
B0303.7	WBGene00015128	chrIII	8693556	8699374	19.9451	19.8192	598.088	434.408	-0.0475727	0.983518	19.9451	21.3987	598.115	664.193	-0.0951033	0.999975
B0303.8	WBGene00015129	chrIII	8699401	8700254	0.0269908	0.0965582	0.348847	0.860939	1.71705	NA	0.0269908	0.0437003	0.349289	0.540991	-0.57511	0.999975
B0303.9	WBGene00015130	chrIII	8700847	8703225	7.13364	7.09125	295.9	194.909	-0.18857	0.959966	7.13364	7.57704	295.854	315.171	-0.0351739	0.999975
B0304.1	WBGene00001948	chrII	4519065	4522434	12.2215	13.8134	NA	NA	NA	NA	12.2215	10.4793	NA	NA	NA	NA
B0304.2	WBGene00015134	chrII	4523611	4524523	12.6243	11.1097	209.796	98.9388	-0.670642	NA	12.6243	13.2945	210.798	205.248	0.0945642	NA
B0304.3	WBGene00015135	chrII	4512207	4522763	0.54046	0.400585	80.0017	45.4533	-0.40191	0.945973	0.54046	0.462557	79.7374	69.3087	0.258295	0.999975
B0304.4	WBGene00015136	chrII	4522458	4523219	3.52357	5.14445	38.8297	33.6125	0.20557	0.980946	3.52357	3.75246	39.069	40.0478	0.0203752	0.999975
B0304.5	WBGene00005058	chrII	4529632	4531961	0.0369636	0.0759582	0.985208	0.973137	0.395949	NA	0.0369636	0.279647	1.08713	5.45724	-2.27157	0.999975
B0304.6	WBGene00005059	chrII	4534738	4537238	0.0596845	0.123635	1.24929	1.50808	0.685336	NA	0.0596845	0.178582	1.20039	3.4042	-1.44774	0.999975
B0304.7	WBGene00005060	chrII	4541861	4543665	0.0205785	0	0.350759	0.190932	-0.463682	NA	0.0205785	0	0.350432	0.203769	0.838272	0.999975
B0304.8	WBGene00005061	chrII	4524630	4527897	0.101682	0.0161083	1.86452	0.49149	-1.50984	NA	0.101682	0.0224668	1.8498	0.34013	2.49929	0.999975
B0304.9	WBGene00005062	chrII	4538984	4540728	0.0302683	0.0235585	0.587282	0.314794	-0.485909	NA	0.0302683	0.097357	0.578396	1.81637	-1.59486	0.999975
B0310.1	WBGene00015137	chrX	493236	497214	17.0455	19.5846	341.455	250.304	-0.0342789	0.990966	17.0455	19.4325	340.985	419.197	-0.241847	0.999975
B0310.2	WBGene00015138	chrX	501965	506944	7.23502	6.63441	207.864	136.437	-0.193674	0.954286	7.23502	7.39255	207.279	219.377	-0.0257673	0.999975
B0310.3	WBGene00015139	chrX	510899	514483	2.84579	3.75015	68.4467	67.3822	0.391121	0.945973	2.84579	3.3848	68.2316	82.9965	-0.226537	0.999975
B0310.5	WBGene00015141	chrX	525928	530177	40.9186	27.7989	1313.29	689.656	-0.515506	0.945973	40.9186	39.696	1313.28	1309.98	0.059707	0.999975
B0310.6	WBGene00015142	chrX	530625	530962	2.4897	2.18486	6.98786	7.14989	0.446805	0.967976	2.4897	2.10799	7.1409	7.47124	-0.00916705	0.999975
B0331.1	WBGene00007140	chrV	9654680	9657925	0.130658	0.966577	3.71705	22.4808	3.0102	0.150582	0.130658	0.0792811	3.71072	3.16104	0.287375	0.999975
B0331.2	WBGene00007141	chrV	9658906	9661590	1.09541	0.47285	32.4158	10.2019	-1.25412	0.92246	1.09541	0.971469	32.2954	29.5135	0.186025	0.999975
B0334.1	WBGene00007142	chrII	11485445	11486710	387.159	658.941	2899.34	3698.11	0.7648	0.842596	387.159	608.508	2897.9	4745.7	-0.655541	0.999975
B0334.10	WBGene00007148	chrII	11518423	11519507	0.089324	0.0149063	0.350759	0.190932	-0.463682	NA	0.089324	0.0229886	0.350433	0.331133	0.137803	0.999975
B0334.11	WBGene00003868	chrII	11493166	11495250	17.466	17.0139	559.721	357.233	-0.234108	0.957633	17.466	18.811	560.771	592.196	-0.0225884	0.999975
B0334.13	WBGene00007149	chrII	11488222	11489555	7.8031	10.3604	51.6337	51.1419	0.399929	0.945973	7.8031	7.46947	51.6998	48.7568	0.140629	0.999975
B0334.15	WBGene00195248	chrII	11496713	11499556	180.693	101.191	2.09648	0.483188	-1.70358	NA	180.693	154.708	2.05638	0.919594	1.21712	0.999975
B0334.2	WBGene00006660	chrII	11483136	11485295	3.36757	5.42972	64.7139	72.9076	0.585729	0.943944	3.36757	3.62411	64.5392	69.6554	-0.0539832	0.999975
B0334.3	WBGene00007143	chrII	11489540	11492957	74.2173	138.266	3175.45	4489.94	0.913471	0.113628	74.2173	67.0217	3175.35	2983.6	0.145939	0.999975
B0334.4	WBGene00007144	chrII	11495627	11496605	29.6807	28.419	464.417	267.698	-0.38108	0.956599	29.6807	32.0523	465.646	488.166	-0.0120618	0.999975
B0334.5	WBGene00007145	chrII	11496713	11499559	4.82829	5.92309	NA	NA	NA	NA	4.82829	0.0142498	NA	NA	NA	NA
B0334.6	WBGene00007146	chrII	11510610	11513826	3.50027	2.22274	82.2405	38.7958	-0.670212	0.945973	3.50027	2.15306	82.1335	53.682	0.669606	0.999975
B0334.7	WBGene00005267	chrII	11515010	11518090	0.231063	0.132226	3.72775	1.5136	-0.886586	NA	0.231063	0.315996	3.7851	6.8572	-0.801213	0.999975
B0334.8	WBGene00000090	chrII	11519434	11526998	5.74178	6.23624	487.811	334.049	-0.132529	0.98111	5.74178	5.71597	488.486	485.018	0.0663545	0.999975
B0336.1	WBGene00006943	chrIII	5722803	5727068	14.1052	9.5111	962.692	369.184	-0.969	NA	14.1052	12.7896	965.316	832.218	0.270116	NA
B0336.10	WBGene00004435	chrIII	5705467	5706281	3298.61	4200.33	18293.6	17703.9	0.366466	0.945973	3298.61	4413.93	18279	25103.7	-0.401638	0.999975
B0336.11	WBGene00015148	chrIII	5706691	5709284	24.6907	20.3057	774.313	484.248	-0.263437	0.954799	24.6907	22.5294	774.222	730.69	0.139562	0.999975
B0336.12	WBGene00015149	chrIII	5710016	5710464	0.31009	0.122356	1.23024	0.4864	-0.924989	NA	0.31009	0.119052	1.21855	0.546134	1.21392	0.999975
B0336.13	WBGene00015150	chrIII	5693990	5695178	15.1152	12.1104	365.269	160.292	-0.774519	NA	15.1152	17.1037	366.8	388.567	-0.0270971	NA
B0336.2	WBGene00000182	chrIII	5716067	5717541	689.044	306.412	17796.6	4241.94	-1.65507	NA	689.044	534.218	17839.1	12913.1	0.52228	NA
B0336.3	WBGene00015143	chrIII	5711502	5714801	49.6905	40.0241	3327.93	1652.85	-0.595932	0.945973	49.6905	49.2821	3334.4	3202.16	0.114457	0.999975
B0336.4	WBGene00004348	chrIII	5698389	5702257	7.407	5.06347	273.719	126.255	-0.702624	0.729394	7.407	7.13716	274.552	269.275	0.0840714	0.999975
B0336.5	WBGene00015145	chrIII	5692874	5693893	13.3018	13.951	216.824	139.209	-0.225535	NA	13.3018	15.0644	217.626	234.722	-0.0530292	NA
B0336.6	WBGene00015146	chrIII	5690061	5692695	22.5345	23.1514	755.911	483.188	-0.231896	0.966112	22.5345	22.3443	757.766	736.875	0.096407	0.999975
B0336.7	WBGene00015147	chrIII	5694689	5697320	8.02365	9.70105	261.065	196.085	0.000804802	0.999555	8.02365	9.58162	261.739	310.365	-0.189761	0.999975
B0336.8	WBGene00002982	chrIII	5697430	5697964	60.6821	60.6178	343.052	212.758	-0.275481	0.959966	60.6821	62.0504	344.203	332.077	0.107816	0.999975
B0336.9	WBGene00006359	chrIII	5702209	5705421	12.2518	9.68814	531.146	287.709	-0.470764	0.945973	12.2518	10.591	532.445	471.715	0.230793	0.999975
B0344.2	WBGene00006955	chrX	1576629	1590890	20.9139	14.3826	639.622	318.989	-0.589978	0.807882	20.9139	18.6599	639.609	580.827	0.195157	0.999975
B0348.1	WBGene00015151	chrV	48921	49619	0.09651	0.89005	0.328125	1.25206	2.34572	NA	0.09651	0.258722	0.32834	0.502406	-0.557587	0.999975
B0348.2	WBGene00015152	chrV	45462	46923	12.1763	42.304	28.1309	79.9516	1.92071	0.693707	12.1763	5.65548	28.1911	15.3866	0.929643	0.999975
B0348.4	WBGene00001177	chrV	20824	43971	26.8783	33.1103	2583.96	2337.92	0.269377	0.945973	26.8783	26.168	2584.22	2665.61	0.0113387	0.999975
B0348.5	WBGene00015153	chrV	5689	6511	4.24235	4.29305	67.3641	51.9933	0.0400808	0.990966	4.24235	3.26915	67.1287	51.2951	0.444184	0.999975
B0348.6	WBGene00002061	chrV	6588	7822	118.242	87.3521	2841.1	1210.67	-0.816905	NA	118.242	102.422	2850.16	2317.2	0.354733	NA
B0350.2	WBGene00006780	chrIV	5966643	6004847	133.069	120.846	18770.6	11813.8	-0.254272	0.953771	133.069	118.941	18767	16094	0.277751	0.999975
B0350.3	WBGene00015154	chrIV	5965469	5966029	0	0	NA	NA	NA	NA	0	0	NA	NA	NA	NA
B0353.1	WBGene00015155	chrIII	557514	572134	19.2177	19.1272	3.04537	4.94742	1.11379	0.945973	19.2177	26.2218	3.00253	3.57554	-0.195906	0.999975
B0361.10	WBGene00015164	chrIII	7285913	7287541	55.7235	33.0477	1254.46	415.42	-1.18069	0.810621	55.7235	55.8373	1256.46	1275.64	0.0342181	0.999975
B0361.11	WBGene00015165	chrIII	7277539	7281153	0.0361317	0.136426	1.31577	3.14722	1.67191	NA	0.0361317	0.0797079	1.23009	2.70806	-1.08242	0.999975
B0361.2	WBGene00015156	chrIII	7293567	7308300	10.9703	9.41168	271.254	154.964	-0.393982	0.945973	10.9703	10.5392	271.744	306.46	-0.117379	0.999975
B0361.3	WBGene00015157	chrIII	7281339	7283892	11.7509	7.54664	463.212	205.12	-0.761467	0.636657	11.7509	9.64499	462.965	382.574	0.331241	0.999975
B0361.4	WBGene00015158	chrIII	7258948	7268422	2.94577	4.70073	62.8465	75.6966	0.68213	0.945973	2.94577	4.25777	62.7387	93.4443	-0.518677	0.999975
B0361.5	WBGene00015159	chrIII	7268350	7275334	32.2407	42.0088	814.939	789.707	0.36836	0.92246	32.2407	31.7922	814.614	840.88	0.0102927	0.999975
B0361.6	WBGene00015160	chrIII	7275440	7277210	12.1759	10.7308	329.007	186.38	-0.406138	0.949493	12.1759	12.6734	329.594	332.5	0.0434085	0.999975
B0361.7	WBGene00015161	chrIII	7283856	7285819	12.171	16.6312	344.827	327.455	0.339158	0.945973	12.171	13.2872	344.923	381.696	-0.0900743	0.999975
B0361.8	WBGene00015162	chrIII	7287782	7290500	16.2885	17.5159	472.111	344.686	-0.0401091	0.989836	16.2885	17.4561	472.126	522.695	-0.090723	0.999975
B0361.9	WBGene00015163	chrIII	7298283	7299579	24.3189	27.186	466.028	381.568	0.125259	0.958598	24.3189	29.4467	466.042	572.598	-0.240989	0.999975
B0365.1	WBGene00007150	chrV	13116487	13120120	29.6573	31.5747	2341.16	1539.21	-0.191297	0.972769	29.6573	26.9899	2346.77	2126.12	0.198531	NA
B0365.3	WBGene00001137	chrV	13126391	13129982	646.525	691.534	40617.7	31785.8	0.0600061	0.98246	646.525	680.695	40621.7	43607.3	-0.0462441	0.999975
B0365.5	WBGene00007152	chrV	13131912	13134843	29.9241	15.294	406.327	141.846	-1.10459	0.456913	29.9241	21.7516	406.395	290.561	0.540118	0.999975
B0365.6	WBGene00007153	chrV	13134925	13138071	60.9665	37.259	2291.01	1045.88	-0.71753	0.77311	60.9665	46.9233	2293.17	1772.65	0.427505	0.999975
B0365.7	WBGene00007154	chrV	13138965	13150276	0.161901	0.0797353	27.3846	9.97366	-1.04344	0.841192	0.161901	0.123304	27.2706	22.0882	0.360145	0.999975
B0379.1	WBGene00007155	chrI	10074957	10077739	49.8965	59.3638	656.761	569.384	0.207767	0.945973	49.8965	61.1147	656.843	812.281	-0.250355	0.999975
B0379.2	WBGene00007156	chrI	10070911	10071819	0.242966	0.915269	1.89216	5.03296	1.82511	NA	0.242966	0.3871	1.928	4.01834	-1.00342	0.999975
B0379.3	WBGene00003508	chrI	10080140	10086280	32.0787	17.1379	2772.73	812.545	-1.35705	NA	32.0787	26.4042	2782.34	2138.15	0.436006	NA
B0379.4	WBGene00007054	chrI	10086380	10102001	30.3443	41.8757	879.245	747.986	0.180481	0.954286	30.3443	31.5164	879.406	924.189	-0.0155836	0.999975
B0379.6	WBGene00007158	chrI	10097305	10097766	0	0	NA	NA	NA	NA	0	0	NA	NA	NA	NA
B0379.7	WBGene00007159	chrI	10072570	10074376	1.90674	3.14977	41.2801	32.3543	0.0622457	NA	1.90674	1.78131	41.4776	35.7353	0.271057	NA
B0391.10	WBGene00007165	chrV	15585677	15592966	1.45819	1.6533	50.0081	25.1706	-0.576688	0.954286	1.45819	1.26989	50.1271	41.8102	0.317808	0.999975
B0391.11	WBGene00007166	chrV	15600340	15602326	2.70729	3.49477	39.2351	45.5237	0.628205	0.947937	2.70729	2.67302	39.1306	40.5388	0.00507051	0.999975
B0391.12	WBGene00006289	chrV	15613166	15614949	0	0	NA	NA	NA	NA	0	0.0179195	0.204043	0.45836	-1.11154	0.999975
B0391.3	WBGene00007161	chrV	15614917	15617592	0	0	NA	NA	NA	NA	0	0.0104474	0.204042	0.331132	-0.642465	0.999975
B0391.4	WBGene00006080	chrV	15610870	15612572	0.0402993	0	1.23567	0.190934	-2.28042	NA	0.0402993	0	1.24726	0.74863	0.792517	0.999975
B0391.5	WBGene00007162	chrV	15605704	15610361	0.989526	1.21813	21.7184	18.098	0.150642	0.978619	0.989526	1.12982	21.6691	23.7968	-0.079058	0.999975
B0391.6	WBGene00007163	chrV	15602895	15605136	0.136109	0.164197	3.50258	2.37422	-0.147234	NA	0.136109	0.106896	3.40048	2.95845	0.256969	0.999975
B0391.9	WBGene00007164	chrV	15593442	15593780	0.128454	0.37643	0.204022	0.484034	1.66012	NA	0.128454	0.572768	0.204043	1.32243	-2.64017	0.999975
B0393.1	WBGene00004469	chrIII	4752863	4754048	4143.78	5082.69	55339	51454	0.30872	0.945973	4143.78	5377.61	55343	73575.2	-0.354744	0.999975
B0393.2	WBGene00007167	chrIII	4754396	4756984	18.9756	13.923	884.983	383.666	-0.792064	NA	18.9756	18.8673	887.218	859.372	0.102081	NA
B0393.3	WBGene00007168	chrIII	4757212	4759696	16.0907	13.7587	836.673	394.368	-0.671384	NA	16.0907	17.1201	839.747	847.561	0.0427128	NA
B0393.4	WBGene00007169	chrIII	4759706	4763574	1.01791	1.53193	69.2137	54.835	0.0777725	NA	1.01791	0.892199	69.4857	57.1514	0.338002	NA
B0393.5	WBGene00007170	chrIII	4765782	4776242	5.1258	3.54985	381.542	188.131	-0.606372	0.862473	5.1258	3.24442	381.76	250.393	0.664548	0.999975
B0393.6	WBGene00007171	chrIII	4780123	4781946	32.8883	11.4888	1300.78	223.74	-2.12575	NA	32.8883	32.7973	1306.65	1190.23	0.190707	NA
B0393.7	WBGene00007172	chrIII	4776228	4778030	0.359401	0.645752	5.19944	7.44929	0.932481	0.945973	0.359401	0.553615	5.39111	8.24513	-0.556885	0.999975
B0393.8	WBGene00007173	chrIII	4751842	4752335	12.4678	22.0853	NA	NA	NA	NA	12.4678	13.8323	0.204046	5.7522	-4.76108	NA
B0393.9	WBGene00044636	chrIII	4778354	4780123	13.1016	14.739	121.678	95.1967	0.0596473	0.990009	13.1016	13.1007	121.947	127.03	-0.00283979	0.999975
B0395.1	WBGene00003729	chrX	16017446	16021677	2.09809	2.02053	63.7304	44.9533	-0.0898218	0.980593	2.09809	2.51573	63.6799	79.1141	-0.257022	0.999975
B0395.2	WBGene00007174	chrX	16030733	16034744	11.952	9.64714	332.311	199.347	-0.323516	0.950742	11.952	9.87294	332.348	285.192	0.276835	0.999975
B0395.3	WBGene00007175	chrX	16034974	16039442	47.4433	61.6245	1816.46	1680.77	0.301734	0.945973	47.4433	45.5027	1816.4	1729.12	0.127119	0.999975
B0399.1	WBGene00007176	chrV	19565355	19606090	13.308	17.5711	591.565	582.139	0.390561	0.945973	13.308	10.961	591.482	501.241	0.294905	0.999975
B0399.2	WBGene00007177	chrV	19550985	19555842	5.71671	3.89117	209.761	105.788	-0.573832	0.945973	5.71671	4.3576	209.605	165.639	0.395701	0.999975
B0403.2	WBGene00006712	chrX	7050583	7055330	2.13265	2.09324	83.4926	60.3128	-0.0554492	0.990966	2.13265	2.07175	83.5731	85.9081	0.0163203	0.999975
B0403.3	WBGene00015167	chrX	7061804	7063286	2.5604	2.82511	35.3436	28.2517	0.0906243	0.98246	2.5604	2.57985	35.3891	37.4929	-0.0272408	0.999975
B0403.4	WBGene00015168	chrX	7066300	7068519	277.166	221.119	8381.1	5075.81	-0.309767	0.945973	277.166	252.285	8384.07	7761.6	0.167372	0.999975
B0403.5	WBGene00015169	chrX	7057763	7061638	9.81473	11.4756	355.086	305.958	0.198902	0.958598	9.81473	7.76978	355.582	278.103	0.410638	0.999975
B0403.6	WBGene00043982	chrX	7071345	7075293	1.87262	1.15742	29.1982	12.2996	-0.83353	0.92871	1.87262	1.53677	29.2734	24.8414	0.292919	0.999975
B0410.1	WBGene00015170	chrX	2894563	2895235	0	0	0.204022	0.650764	2.08714	NA	0	0	NA	NA	NA	NA
B0410.2	WBGene00015171	chrX	2885858	2890593	4.50427	4.15952	163.368	102.091	-0.264544	0.945973	4.50427	4.4899	163.349	169.203	0.00527863	0.999975
B0410.3	WBGene00015172	chrX	2890565	2891483	48.2694	70.7151	696.069	755.574	0.532078	0.931151	48.2694	53.5292	695.265	787.35	-0.123368	0.999975
B0412.1	WBGene00000895	chrIII	816239	821723	5.01949	6.50424	123.089	115.607	0.323261	0.949276	5.01949	4.97265	123.215	125.666	0.0276612	0.999975
B0412.2	WBGene00000903	chrIII	811821	813758	45.0966	69.9531	1345.58	1605.1	0.668175	0.945973	45.0966	64.2945	1345.42	1985.77	-0.505566	0.999975
B0412.3	WBGene00015173	chrIII	795130	809434	17.5405	16.6417	1235.68	824.464	-0.17004	0.955007	17.5405	18.445	1236.78	1317.07	-0.0346664	0.999975
B0412.4	WBGene00004498	chrIII	794288	795072	7796.65	8316.65	9009.4	8253.96	0.287391	0.958598	7796.65	7486.45	9004.72	9803.44	-0.0665332	0.999975
B0414.1	WBGene00015175	chrI	5801874	5803269	0.0364448	0.0120272	0.689032	0.314795	-0.716424	NA	0.0364448	0.0726691	0.705753	1.93439	-1.39857	0.999975
B0414.2	WBGene00004393	chrI	5776156	5788612	2.37193	2.40069	66.8338	50.952	0.0222954	0.992785	2.37193	1.72875	66.7222	50.1603	0.467697	0.999975
B0414.3	WBGene00001856	chrI	5774587	5775613	120.997	127.915	2267.95	1289.71	-0.400607	NA	120.997	129.033	2276.56	2258.41	0.0676265	NA
B0414.5	WBGene00000772	chrI	5788633	5791755	28.0988	11.6121	2226.61	450.949	-1.89008	NA	28.0988	24.8305	2236.59	1790.45	0.377048	NA
B0414.6	WBGene00001600	chrI	5792326	5795124	3.13151	3.73794	200.999	129.619	-0.219179	NA	3.13151	3.31361	201.775	197.35	0.088068	NA
B0414.7	WBGene00003472	chrI	5795406	5801302	15.5941	10.7232	1420.36	664.633	-0.681896	0.870705	15.5941	15.2372	1419.9	1437.86	0.037942	0.999975
B0414.8	WBGene00015176	chrI	5803961	5807294	12.9098	8.36101	579.023	259.641	-0.743368	0.831217	12.9098	14.0326	578.968	647.074	-0.104374	0.999975
B0416.1	WBGene00015177	chrX	9303664	9310424	4.53894	4.3896	360.279	252.89	-0.0968728	0.976582	4.53894	3.47252	360.431	281.601	0.412146	0.999975
B0416.2	WBGene00015178	chrX	9299111	9300072	0	0	NA	NA	NA	NA	0	0	NA	NA	NA	NA
B0416.3	WBGene00015179	chrX	9291591	9293587	1.28912	1.79425	25.188	22.681	0.262486	0.955159	1.28912	2.39513	25.1499	43.0195	-0.718363	0.999975
B0416.4	WBGene00015180	chrX	9278902	9279887	1.44794	1.91569	24.2959	15.9212	-0.196025	NA	1.44794	1.80327	24.3523	27.3278	-0.110239	NA
B0416.5	WBGene00015181	chrX	9268572	9270794	56.3982	54.2367	2273.66	1473.86	-0.211681	0.954286	56.3982	54.1749	2275.3	2177.84	0.119239	0.999975
B0416.6	WBGene00001638	chrX	9293606	9296563	10.6002	12.2807	339.01	293.502	0.205781	0.950167	10.6002	9.84081	338.796	324.317	0.119088	0.999975
B0416.7	WBGene00015182	chrX	9296885	9297891	8.53796	11.0325	43.2806	49.6132	0.61074	0.945973	8.53796	11.0972	43.6166	64.9759	-0.518953	0.999975
B0432.1	WBGene00015183	chrII	297398	299527	0.657652	0.262373	4.09585	1.42296	-1.11154	NA	0.657652	0.538254	4.24338	2.98556	0.563284	0.999975
B0432.10	WBGene00015191	chrII	283886	286275	4.2425	4.72194	84.0358	59.9855	-0.0726563	0.989836	4.2425	5.34028	83.7026	105.312	-0.275254	0.999975
B0432.11	WBGene00015192	chrII	293863	294642	0.26783	0.191384	3.41329	1.19832	-1.09641	NA	0.26783	0.105192	3.40199	1.10286	1.6812	0.999975
B0432.12	WBGene00015193	chrII	296274	297017	0.258198	0.395731	2.89548	2.17209	-0.000979464	NA	0.258198	0.166947	2.90518	1.60722	0.910139	0.999975
B0432.13	WBGene00015194	chrII	276211	282576	7.49536	6.08613	121.092	49.8167	-0.867665	0.945973	7.49536	7.21576	121.4	100.613	0.327026	NA
B0432.14	WBGene00044640	chrII	264352	265841	10.5261	12.8461	88.162	99.9521	0.594814	0.945973	10.5261	15.4657	88.2574	167.334	-0.86687	0.999975
B0432.2	WBGene00015184	chrII	290580	291861	36.6392	35.7039	416.06	290.553	-0.104252	0.976137	36.6392	41.6318	416.166	477.331	-0.141758	0.999975
B0432.3	WBGene00015185	chrII	288936	290399	41.8973	32.4594	347.053	207.778	-0.326376	0.945973	41.8973	45.3396	346.764	383.112	-0.0877387	0.999975
B0432.4	WBGene00015186	chrII	286624	288850	83.3224	66.4142	1553.7	922.988	-0.337591	0.945973	83.3224	87.3661	1553.25	1668.94	-0.0475704	0.999975
B0432.5	WBGene00000296	chrII	257818	261063	2.1377	1.48668	55.6929	28.0565	-0.575425	0.945973	2.1377	2.8362	55.657	73.5672	-0.346425	0.999975
B0432.6	WBGene00015187	chrII	266446	269280	4.52446	3.2746	98.197	46.8466	-0.653999	0.945973	4.52446	5.12432	98.2586	108.616	-0.0885039	0.999975
B0432.7	WBGene00015188	chrII	269389	273966	3.94143	2.45248	158.826	61.8782	-0.946208	0.916816	3.94143	3.82405	158.758	156.244	0.0791053	0.999975
B0432.8	WBGene00015189	chrII	276425	278738	3.43574	3.10153	5.15334	2.09391	-0.885572	NA	3.43574	4.73087	4.88599	5.39798	-0.0876936	0.999975
B0432.9	WBGene00015190	chrII	280555	283697	1.31921	1.32343	20.9687	16.8583	0.0989608	0.985519	1.31921	1.70043	21.0221	29.1795	-0.416973	0.999975
B0454.1	WBGene00002997	chrII	3056643	3060251	8.65424	8.71729	139.722	86.8578	-0.272094	0.945973	8.65424	9.38484	139.567	153.216	-0.0785367	0.999975
B0454.10	WBGene00005542	chrII	3046221	3048157	0.667176	0.690514	11.9251	10.741	0.262865	0.974337	0.667176	1.29728	12.0898	24.9727	-0.990486	0.999975
B0454.2	WBGene00005543	chrII	3051005	3052325	0.0920269	0.324056	1.79667	3.63951	1.43215	NA	0.0920269	0.158453	1.76447	2.98899	-0.704349	0.999975
B0454.3	WBGene00005540	chrII	3048680	3050438	0.127012	0.125155	2.52709	1.83445	-0.0483929	NA	0.127012	0.0517778	2.52226	1.29131	1.02196	0.999975
B0454.4	WBGene00005541	chrII	3044325	3046118	0.469209	0.764811	8.74729	9.88103	0.58956	0.945973	0.469209	0.767501	8.7416	14.599	-0.683828	0.999975
B0454.5	WBGene00015196	chrII	3038861	3040825	12.6405	7.70242	113.596	50.7496	-0.748703	0.940138	12.6405	13.029	114.175	118.988	-0.00348889	0.999975
B0454.6	WBGene00015197	chrII	3032782	3036125	8.13321	11.945	299.512	337.108	0.58433	0.840487	8.13321	8.56195	298.895	323.815	-0.0594562	0.999975
B0454.7	WBGene00015198	chrII	3020563	3023434	0.0660313	0.0413922	1.15987	0.72348	-0.2672	NA	0.0660313	0.0395097	1.15964	0.72458	0.734536	0.999975
B0454.8	WBGene00015199	chrII	3040942	3043409	0.866692	0.261122	16.7986	5.03264	-1.32522	0.871592	0.866692	0.600405	16.8907	14.6651	0.259912	0.999975
B0454.9	WBGene00015200	chrII	3052377	3054351	4.81672	4.93885	120.193	88.8985	-0.021386	0.991345	4.81672	5.38284	120.156	136.356	-0.126401	0.999975
B0457.1	WBGene00002251	chrII	8896779	8908592	23.9204	24.0231	1896.34	1118.08	-0.348455	NA	23.9204	26.4522	1900.83	2145.64	-0.118704	NA
B0457.2	WBGene00007178	chrII	8924509	8926517	13.0075	17.9054	252.112	267.092	0.497011	0.923422	13.0075	16.6303	251.531	333.764	-0.352019	0.999975
B0457.4	WBGene00007179	chrII	8910851	8911968	0.126983	0.204774	2.0119	2.2402	0.568801	NA	0.126983	0.0998357	2.00958	1.1934	0.807885	0.999975
B0457.6	WBGene00007180	chrII	8922389	8924311	40.9528	41.8508	346.958	251.935	-0.0479763	0.989836	40.9528	49.2645	347.257	419.967	-0.218196	0.999975
B0462.1	WBGene00007181	chrV	18324993	18328763	0.322585	0.920455	12.9934	26.2821	1.43004	0.696821	0.322585	0.163471	13.0174	7.14879	0.920748	0.999975
B0462.3	WBGene00007182	chrV	18318566	18319748	0.0436467	0.164303	0.663726	2.01484	2.01574	NA	0.0436467	0.0407165	0.715399	0.720924	0.0449766	0.999975
B0462.4	WBGene00007183	chrV	18329083	18331151	1.97947	3.68507	9.05975	12.1243	0.834091	0.945973	1.97947	1.82916	9.10541	9.08676	0.0590335	0.999975
B0462.5	WBGene00194695	chrV	18322186	18323299	2.94868	5.19814	40.8107	51.4893	0.74906	0.945973	2.94868	2.48596	40.867	33.984	0.322156	0.999975
B0464.1	WBGene00001094	chrIII	9489077	9491152	124.777	117.722	4361.06	2952.96	-0.148783	0.957525	124.777	129.645	4363.8	4587.39	-0.0160116	0.999975
B0464.2	WBGene00007184	chrIII	9491219	9497236	29.7779	22.2825	1914.15	999.868	-0.523163	0.916936	29.7779	28.0875	1915.96	1819.84	0.130327	0.999975
B0464.3	WBGene00007185	chrIII	9488533	9489102	1441.43	1933.81	3226.63	3168.94	0.387709	0.945973	1441.43	1740.42	3230.29	3709.38	-0.143442	0.999975
B0464.4	WBGene00000268	chrIII	9469841	9485367	29.4585	24.5286	1280.58	581.065	-0.726286	0.86759	29.4585	29.631	1282.33	1317.4	0.0171438	0.999975
B0464.5	WBGene00004980	chrIII	9456478	9462921	130.144	101.838	9059.61	4363.86	-0.64011	NA	130.144	118.728	9079.1	7841.81	0.267438	NA
B0464.6	WBGene00007186	chrIII	9462899	9465881	26.2922	21.5078	1259.24	590.059	-0.679888	0.945973	26.2922	25.6887	1262.44	1182.67	0.150249	NA
B0464.7	WBGene00000235	chrIII	9467372	9467982	160.856	134.442	1175.04	598.008	-0.560742	0.898891	160.856	172.728	1176.5	1278.45	-0.0638237	0.999975
B0464.8	WBGene00007187	chrIII	9468071	9470450	5.93967	5.65883	143.872	78.5969	-0.45851	0.954799	5.93967	6.61421	144.304	153.057	-0.0288819	0.999975
B0464.9	WBGene00007188	chrIII	9465688	9467064	8.76306	8.83304	210.766	137.047	-0.207243	0.972136	8.76306	9.45291	211.341	223.441	-0.0242486	0.999975
B0478.1	WBGene00002178	chrIV	6957629	6963705	7.02029	7.5209	190.854	162.791	0.18429	0.976137	7.02029	7.29302	190.694	209.873	-0.0821774	0.999975
B0478.3	WBGene00015202	chrIV	6963863	6964551	8.31356	8.75048	42.8855	38.1367	0.244425	0.975033	8.31356	9.51902	42.7808	56.199	-0.337504	0.999975
B0491.1	WBGene00007189	chrII	11348365	11350312	12.0801	13.0139	363.412	240.915	-0.179347	0.976137	12.0801	14.2717	364.168	418.852	-0.145765	0.999975
B0491.2	WBGene00005016	chrII	11336626	11337771	545.931	158.428	9165.2	2007.19	-1.77726	0.0505025	545.931	493.797	9157.78	8538.58	0.157078	0.999975
B0491.3	WBGene00007190	chrII	11338385	11339535	1.07797	2.35479	18.2105	20.8197	0.606911	NA	1.07797	0.966013	18.2787	15.1414	0.32774	0.999975
B0491.4	WBGene00007191	chrII	11340069	11343466	1.85073	2.72327	62.5661	61.3773	0.386059	0.945973	1.85073	2.51008	62.5041	85.2195	-0.391157	0.999975
B0491.5	WBGene00007192	chrII	11343651	11345679	273.251	327.397	5290.36	4771.65	0.264858	0.945973	273.251	278.05	5293.01	5536.32	-0.0087629	0.999975
B0491.6	WBGene00007193	chrII	11345880	11347893	14.1963	18.7112	455.241	419.256	0.294937	0.945973	14.1963	17.3669	455.645	573.561	-0.275964	0.999975
B0491.7	WBGene00007194	chrII	11350125	11351311	11.8361	12.9324	184.671	152.235	0.135077	0.958598	11.8361	17.5677	184.483	286.939	-0.581181	0.999975
B0491.8	WBGene00000529	chrII	11358382	11370248	5.84255	7.18976	316.497	306.927	0.369439	0.949493	5.84255	5.44223	316.125	311.958	0.0752179	0.999975
B0495.1	WBGene00005149	chrII	7709735	7711391	0.176864	0.0469533	4.58669	0.595951	-2.53045	NA	0.176864	0.0933625	4.59041	1.70794	1.48244	0.999975
B0495.10	WBGene00007044	chrII	7711817	7718538	17.6162	17.6463	751.217	579.598	0.0395573	0.990966	17.6162	18.1506	750.439	813.507	-0.060345	0.999975
B0495.2	WBGene00015203	chrII	7699200	7702251	17.3545	12.8845	1045.22	467.858	-0.745924	NA	17.3545	17.8407	1048.21	1041.89	0.0647983	NA
B0495.4	WBGene00003730	chrII	7690655	7693906	31.8965	15.2705	1214.46	433.11	-1.07377	0.307169	31.8965	24.4711	1212.93	968.793	0.380312	0.999975
B0495.5	WBGene00015204	chrII	7695882	7698454	6.01522	7.8277	265.666	244.512	0.294022	0.945973	6.01522	6.84957	265.704	308.866	-0.161088	0.999975
B0495.6	WBGene00015205	chrII	7698558	7699125	69.679	85.8447	414.815	363.769	0.224291	0.957525	69.679	69.4978	415.181	406.884	0.0851962	0.999975
B0495.7	WBGene00015206	chrII	7701894	7705182	56.8383	40.5999	3449.59	1726.64	-0.584721	0.339422	56.8383	45.2379	3451.61	2838.63	0.33815	0.999975
B0495.8	WBGene00015207	chrII	7705481	7707430	24.9344	25.2205	486.505	323.558	-0.174696	0.957633	24.9344	22.7731	487.126	451.715	0.164954	0.999975
B0495.9	WBGene00015208	chrII	7707528	7708663	20.7402	20.4315	309.095	210.621	-0.139667	0.95865	20.7402	21.4225	309.237	317.022	0.0202058	0.999975
B0496.1	WBGene00015210	chrIV	7446378	7447452	0.0268681	0.138177	0.712154	1.49867	1.48716	NA	0.0268681	0.0743894	0.725619	1.24995	-0.728518	0.999975
B0496.11	WBGene00194883	chrIV	7433536	7433947	6.00742	8.60538	22.1597	21.1993	0.349813	0.959966	6.00742	8.3086	22.191	30.7678	-0.415368	0.999975
B0496.2	WBGene00015211	chrIV	7447844	7449363	0	0.0476577	0.204022	0.796149	2.37805	NA	0	0.048799	0.204044	1.45951	-2.78246	0.999975
B0496.3	WBGene00006814	chrIV	7424484	7444651	18.2905	17.5498	1508.21	963.881	-0.232177	0.954286	18.2905	15.8828	1507.72	1292.97	0.277756	0.999975
B0496.5	WBGene00015214	chrIV	7420946	7422660	0.269282	0.272707	6.10202	4.58064	-3.1e-06	0.999997	0.269282	0.841781	6.05016	19.943	-1.66476	0.999975
B0496.6	WBGene00015215	chrIV	7419140	7419960	0.0948655	0.209423	1.52786	1.59247	0.47349	NA	0.0948655	0.137146	1.43488	1.54002	-0.045937	0.999975
B0496.7	WBGene00015216	chrIV	7444622	7445354	16.2929	21.1039	89.4245	80.5057	0.262156	0.957633	16.2929	10.745	89.259	57.0098	0.702861	0.999975
B0496.8	WBGene00015217	chrIV	7449072	7451434	7.58499	8.67608	230.119	187.625	0.119207	0.976446	7.58499	6.42893	230.339	204.841	0.225335	0.999975
B0507.1	WBGene00015218	chrV	8776633	8779271	9.90634	7.45411	395.541	212.666	-0.481499	0.874189	9.90634	8.63003	395.567	353.146	0.219731	0.999975
B0507.10	WBGene00015227	chrV	8758797	8760494	1.76312	2.392	46.4846	47.2675	0.437831	0.945973	1.76312	2.49673	46.5525	67.9021	-0.488523	0.999975
B0507.11	WBGene00006006	chrV	8771876	8773759	0.0982235	0.0497586	1.48075	0.648464	-0.777498	NA	0.0982235	0.133339	1.53624	2.54422	-0.671743	0.999975
B0507.2	WBGene00015219	chrV	8774309	8776494	19.9835	22.8268	518.715	432.932	0.152934	0.958598	19.9835	22.617	518.231	606.544	-0.170942	0.999975
B0507.3	WBGene00015220	chrV	8768886	8770854	5.35017	8.41993	134.907	150.831	0.574702	0.563784	5.35017	5.8646	134.99	153.955	-0.133585	0.999975
B0507.4	WBGene00015221	chrV	8754947	8755737	0	0	NA	NA	NA	NA	0	0.0383023	0.204042	0.343882	-0.696972	0.999975
B0507.5	WBGene00015222	chrV	8753672	8754851	0	0	NA	NA	NA	NA	0	0.0734863	0.204043	0.722252	-1.76755	0.999975
B0507.6	WBGene00015223	chrV	8746135	8753044	0.21243	0.316602	9.57674	10.8038	0.587662	0.957214	0.21243	0.293597	9.5972	13.0783	-0.390413	0.999975
B0507.7	WBGene00015224	chrV	8756467	8758698	0.108847	0.0221923	2.43393	0.314795	-2.53707	NA	0.108847	0.0940045	2.40572	2.37296	0.0758577	0.999975
B0507.8	WBGene00015225	chrV	8760664	8763172	0.891951	1.66518	21.94	29.0702	0.819714	0.888689	0.891951	1.3388	21.9784	34.7168	-0.603471	0.999975
B0507.9	WBGene00015226	chrV	8764865	8766016	0.180585	0.0641925	2.38363	0.606334	-1.56124	NA	0.180585	0.139871	2.37547	2.01518	0.293378	0.999975
B0511.1	WBGene00001432	chrI	10667943	10671005	9.4848	4.24567	164.913	51.7825	-1.25743	0.325958	9.4848	4.43591	164.906	80.2497	1.09515	0.999975
B0511.10	WBGene00001228	chrI	10640381	10642272	77.6704	75.117	2074.47	1505.69	-0.0485832	0.985519	77.6704	73.7682	2074.93	2013	0.0997872	0.999975
B0511.11	WBGene00015236	chrI	10648589	10654168	0.845726	1.25957	32.5364	28.9421	0.24485	0.976137	0.845726	3.4257	32.6606	111.973	-1.72145	0.999975
B0511.12	WBGene00015237	chrI	10654286	10661591	19.6868	15.4673	2416.61	1148.37	-0.659661	NA	19.6868	18.2339	2422.96	2183.82	0.205997	NA
B0511.13	WBGene00015238	chrI	10633178	10636006	5.33624	5.58836	224.701	136.906	-0.301081	NA	5.33624	6.2074	225.531	256.771	-0.131079	NA
B0511.14	WBGene00015239	chrI	10662515	10666866	10.7803	8.29502	398.091	197.007	-0.601115	0.945973	10.7803	8.36765	398.497	306.185	0.436242	0.999975
B0511.2	WBGene00015228	chrI	10651018	10652951	0.299537	0.66036	1.90629	2.43367	0.766097	NA	0.299537	0.482731	1.84643	4.84052	-1.33435	0.999975
B0511.3	WBGene00015229	chrI	10646750	10647766	0.213921	0.214167	3.92347	2.07966	-0.502051	NA	0.213921	0.21179	3.73427	3.53748	0.134178	0.999975
B0511.4	WBGene00015230	chrI	10644272	10645606	0.051493	0.508862	1.38498	7.08878	2.76941	0.945973	0.051493	0.33631	1.3	7.67617	-2.5058	0.999975
B0511.5	WBGene00015231	chrI	10628731	10631662	1.93282	2.35628	33.0648	30.6228	0.303047	0.952818	1.93282	1.55634	33.2428	27.1731	0.346937	0.999975
B0511.6	WBGene00015232	chrI	10624452	10628376	65.94	99.3914	NA	NA	NA	NA	65.94	77.9246	NA	NA	NA	NA
B0511.7	WBGene00015233	chrI	10631639	10633141	14.2808	18.1732	265.882	226.503	0.182478	0.966112	14.2808	14.7705	266.588	279.894	-0.0141974	0.999975
B0511.8	WBGene00044321	chrI	10636681	10638966	49.0333	34.7315	1568.68	790.535	-0.574916	0.48611	49.0333	47.1079	1569.24	1507.15	0.114314	0.999975
B0511.9	WBGene00015235	chrI	10639074	10640219	40.6936	34.9334	720.226	340.74	-0.666043	NA	40.6936	40.678	722.656	700.425	0.101153	NA
B0513.1	WBGene00001562	chrIV	13888063	13893956	65.1717	45.1394	5269.53	2302.44	-0.780778	0.784348	65.1717	66.1409	5276.35	5276.24	0.0561036	0.999975
B0513.2	WBGene00007195	chrIV	13882706	13884152	31.327	26.3492	434.298	236.715	-0.461802	0.945973	31.327	26.5185	435.705	348.778	0.377118	0.999975
B0513.3	WBGene00004443	chrIV	13882168	13882638	28539.2	31616.6	14313.8	11963.9	0.155022	0.97068	28539.2	37145.3	14302.4	18536.8	-0.318067	0.999975
B0513.4	WBGene00007196	chrIV	13880112	13881517	70.2202	160.076	220.45	146.369	-0.1771	NA	70.2202	52.0136	221.488	238.692	-0.0518487	NA
B0513.5	WBGene00007197	chrIV	13868528	13876592	24.116	22.9484	847.013	599.341	-0.0852741	0.98246	24.116	23.539	846.187	860.079	0.0325811	0.999975
B0513.6	WBGene00007198	chrIV	13854329	13857326	0.0376483	0.122499	0.204022	0.625883	2.0309	NA	0.0376483	0.0517621	NA	NA	NA	NA
B0513.9	WBGene00007200	chrIV	13860118	13865269	44.77	90.1522	160.997	247.079	1.03167	0.834912	44.77	55.1313	160.911	201.988	-0.271926	0.999975
B0523.1	WBGene00002212	chrIII	8671622	8673545	0.0802032	0.318657	2.66392	5.9339	1.56916	0.949744	0.0802032	0.0975719	2.49195	2.75768	-0.0901032	0.999975
B0523.3	WBGene00003993	chrIII	8670463	8674970	3.32537	3.9994	132.443	89.9774	-0.144004	0.987738	3.32537	3.99607	132.777	154.023	-0.158062	NA
B0523.5	WBGene00001443	chrIII	8675216	8683612	12.0311	8.6625	1238.89	562.1	-0.726411	0.935617	12.0311	10.737	1240.1	1087.82	0.245086	0.999975
B0524.2	WBGene00015241	chrIII	1894092	1899847	0.0346588	0.0216705	0.802311	0.314795	-0.936014	NA	0.0346588	0.0195861	0.804709	0.343886	1.28261	0.999975
B0524.3	WBGene00015242	chrIII	1887548	1889682	0	0.0136308	0.204021	0.314792	1.03942	NA	0	0.0053286	0.204042	0.331132	-0.642465	0.999975
B0524.4	WBGene00015243	chrIII	1883597	1886209	0.0338374	0.057538	2.55222	1.80044	-0.0896712	NA	0.0338374	0.0297506	2.51403	1.56593	0.739059	0.999975
B0524.5	WBGene00015244	chrIII	1891373	1893833	0.462813	0.639589	4.99765	3.51553	-0.0937717	0.993853	0.462813	0.456725	4.9622	4.67533	0.141987	0.999975
B0524.6	WBGene00015245	chrIII	1902183	1905631	25.792	20.8688	406.643	204.078	-0.58091	0.945973	25.792	24.2804	407.922	369.716	0.197951	0.999975
B0545.1	WBGene00006599	chrIV	92015	110924	30.1729	41.2437	1506.69	1499.69	0.407019	0.945973	30.1729	30.3135	1506.72	1612.61	-0.0419132	0.999975
B0545.3	WBGene00015246	chrIV	86874	90082	0.123318	0.198566	2.83837	2.80093	0.394576	NA	0.123318	0.1568	2.8671	4.23751	-0.507549	0.999975
B0545.4	WBGene00015247	chrIV	109053	109943	0.233409	0.920752	3.1327	7.74031	1.71872	0.884591	0.233409	0.436264	3.16929	5.95804	-0.854606	0.999975
B0546.1	WBGene00015248	chrIV	3385634	3386904	1113.41	1434.42	6207.47	6132.61	0.39623	0.945973	1113.41	1334.77	6206.59	7636.41	-0.243018	0.999975
B0546.2	WBGene00015249	chrIV	3373390	3378129	26.3679	30.4918	886.071	628.264	-0.0823166	0.989087	26.3679	28.4967	888.117	910.432	0.0202734	0.999975
B0546.3	WBGene00015250	chrIV	3378787	3382831	17.2951	26.8104	445.619	516.41	0.626442	0.831217	17.2951	18.4106	444.982	494.138	-0.095092	0.999975
B0546.4	WBGene00015251	chrIV	3382944	3384144	30.6648	65.7331	364.905	566.12	1.04732	0.198486	30.6648	41.2374	364.773	500.158	-0.399309	0.999975
B0546.5	WBGene00015252	chrIV	3388072	3390084	0.0565002	0.00786195	0.350759	0.190932	-0.463682	NA	0.0565002	0.0912271	0.346827	0.797256	-1.14475	0.999975
B0547.1	WBGene00000817	chrIV	5649519	5651070	24.3179	24.9056	593.389	397.951	-0.162652	0.975937	24.3179	22.9919	594.733	544.895	0.182338	0.999975
B0547.2	WBGene00015253	chrIV	5645819	5646222	0	0	NA	NA	NA	NA	0	0	NA	NA	NA	NA
B0547.4	WBGene00005086	chrIV	5643240	5645603	0.119407	0.025229	2.14644	0.314795	-2.35573	NA	0.119407	0.0575543	2.05971	1.03857	1.04392	0.999975
B0554.1	WBGene00015254	chrV	438401	438675	3.20927	0.470967	4.65001	0.850003	-2.03796	NA	3.20927	0	4.68237	0.331574	3.87591	0.999975
B0554.2	WBGene00015255	chrV	434768	436727	0	0	NA	NA	NA	NA	0	0.00550625	0.204043	0.45836	-1.11154	0.999975
B0554.3	WBGene00015256	chrV	434148	434402	0	0	NA	NA	NA	NA	0	0	NA	NA	NA	NA
B0554.4	WBGene00015257	chrV	430612	433575	0.0572845	0.0222943	1.72879	0.525919	-1.30312	NA	0.0572845	0.00578338	1.73474	0.470679	1.93798	0.999975
B0554.5	WBGene00015258	chrV	424440	426561	1.79191	3.31073	50.5928	70.2221	0.886728	0.898891	1.79191	1.78759	50.9295	51.8231	0.0309793	0.999975
B0554.6	WBGene00015259	chrV	422498	424167	2.14728	1.0755	46.4655	21.1574	-0.721264	0.945973	2.14728	0.829331	46.8055	18.3393	1.40781	0.999975
B0554.7	WBGene00015260	chrV	437576	441024	0.863052	0.73588	26.7986	18.3072	-0.136011	0.984805	0.863052	0.712522	26.9943	21.3305	0.395811	0.999975
B0563.1	WBGene00015261	chrX	9171504	9172147	0.049398	0.291294	0.347113	1.92709	2.88668	NA	0.049398	0.29732	0.342183	2.40182	-2.75521	0.999975
B0563.10	WBGene00077673	chrX	9166690	9167199	0.0776665	0.0798843	0.512288	0.314794	-0.288812	NA	0.0776665	0	0.511474	0.20377	1.38379	0.999975
B0563.2	WBGene00006637	chrX	9163106	9165912	3.13123	2.18601	50.2543	30.1172	-0.324922	0.958598	3.13123	2.95207	50.5533	50.5388	0.0564877	0.999975
B0563.4	WBGene00006479	chrX	9150634	9160597	71.0851	86.4095	1362.64	1175.88	0.20107	0.945973	71.0851	82.4601	1362.27	1601.33	-0.177187	0.999975
B0563.5	WBGene00015262	chrX	9146058	9147498	0.851537	2.78369	5.15637	12.2862	1.66635	0.703341	0.851537	1.26728	5.11959	7.94111	-0.577237	0.999975
B0563.6	WBGene00015263	chrX	9137869	9145538	3.91315	4.68689	111.668	106.811	0.349578	0.945973	3.91315	4.60291	111.656	136.385	-0.232552	0.999975
B0563.7	WBGene00015264	chrX	9152377	9154127	2.27886	2.87721	27.5649	28.1479	0.443932	0.945973	2.27886	2.30351	27.5391	27.9064	0.0369602	0.999975
B0563.8	WBGene00015265	chrX	9173627	9174433	0.752467	0.424635	1.41722	0.624173	-0.769307	NA	0.752467	0.367845	1.40106	0.945854	0.622903	0.999975
B0563.9	WBGene00044687	chrX	9168481	9168965	0.146763	1.3349	0.515638	3.23203	3.06175	NA	0.146763	0	0.511848	0.719359	-0.43492	0.999975
B0564.1	WBGene00044083	chrIV	13098953	13100592	75.7054	58.9224	1126.18	672.26	-0.330615	0.945973	75.7054	74.1916	1127.78	1155.99	0.0204284	0.999975
B0564.10	WBGene00006766	chrIV	13119071	13124363	8.08276	10.2561	168.021	165.773	0.394304	0.945973	8.08276	9.36256	168.693	206.315	-0.234375	0.999975
B0564.11	WBGene00023421	chrIV	13105298	13106902	12.205	15.1788	290.165	215.701	-0.0141045	0.996419	12.205	13.3734	291.161	294.194	0.0411243	0.999975
B0564.2	WBGene00007202	chrIV	13107632	13111479	5.53713	6.95945	72.4336	62.3157	0.196671	0.973631	5.53713	5.98951	72.6017	75.4585	0.000394626	0.999975
B0564.3	WBGene00007203	chrIV	13108115	13109775	3.88045	10.1334	90.6955	177.624	1.38346	0.457157	3.88045	5.65215	90.4371	138.208	-0.555782	0.999975
B0564.4	WBGene00007204	chrIV	13111495	13113058	0.421866	1.05561	1.34454	0.71532	-0.496718	NA	0.421866	0.633737	1.29666	1.24094	0.119436	0.999975
B0564.6	WBGene00007206	chrIV	13129627	13133206	3.63278	3.81506	NA	NA	NA	NA	3.63278	3.60787	NA	NA	NA	NA
B0564.7	WBGene00007207	chrIV	13100688	13104855	16.0708	11.2226	640.489	300.734	-0.676949	0.776382	16.0708	15.1834	641.643	609.552	0.130096	0.999975
B0564.9	WBGene00007208	chrIV	13135219	13138798	2.82896	2.96534	0.204021	0.314792	1.03942	NA	2.82896	2.8043	NA	NA	NA	NA
BE0003N10.1	WBGene00015266	chrIII	1037498	1046264	7.38748	6.20682	373.878	219.763	-0.352883	0.945973	7.38748	7.48629	374.29	383.559	0.0207814	0.999975
BE0003N10.2	WBGene00015267	chrIII	1031303	1037202	8.96451	8.62923	320.267	193.717	-0.311592	0.957525	8.96451	8.81078	321.087	306.795	0.121762	0.999975
BE0003N10.3	WBGene00015268	chrIII	1046237	1060000	1.8322	1.41302	136.502	78.0666	-0.392413	0.945973	1.8322	1.25419	136.425	96.2177	0.559806	0.999975
BE10.1	WBGene00007209	chrIII	12787577	12789376	0.471898	0.813442	11.1611	10.8294	0.37021	NA	0.471898	0.586881	11.2564	12.8621	-0.136302	0.999975
BE10.2	WBGene00007210	chrIII	12793282	12798056	14.3175	12.8748	443.178	296.973	-0.16382	0.963718	14.3175	12.0398	443.078	388.515	0.245667	0.999975
BE10.3	WBGene00007211	chrIII	12807989	12811549	0.0104709	0.0628905	0.347857	1.5054	2.52732	NA	0.0104709	0.0456698	0.343221	1.56569	-2.13352	0.999975
BE10.4	WBGene00007212	chrIII	12813413	12816697	1.00985	1.85408	18.741	27.353	0.959237	0.867334	1.00985	1.06681	18.9699	23.3032	-0.240742	0.999975
BE10.5	WBGene00044127	chrIII	12806108	12806754	0.0895765	0.112021	0.35076	0.314793	0.257655	NA	0.0895765	0	0.350433	0.331133	0.137803	0.999975
C01A2.1	WBGene00007213	chrI	13408785	13411440	0.274386	0.432839	9.97847	10.9814	0.551901	0.945973	0.274386	0.347953	10.1059	14.2552	-0.440214	0.999975
C01A2.2	WBGene00007214	chrI	13397256	13398517	40.9961	48.05	198.138	174.969	0.234329	0.973459	40.9961	77.468	197.859	250.57	-0.284668	0.999975
C01A2.3	WBGene00007215	chrI	13387805	13391439	34.5528	21.8094	772.135	348.791	-0.732757	0.453118	34.5528	36.0904	772.745	806.89	-0.00630387	0.999975
C01A2.4	WBGene00007216	chrI	13392104	13393990	28.6106	37.6492	289.74	282.529	0.377378	0.914753	28.6106	38.1698	289.926	396.442	-0.395349	0.999975
C01A2.5	WBGene00007217	chrI	13384740	13387073	19.6355	21.3683	392.028	301.368	0.0343042	0.989474	19.6355	20.157	391.686	408.23	-0.00361176	0.999975
C01A2.6	WBGene00007218	chrI	13379905	13384360	0.0216174	0.256225	0.464109	2.68994	2.94877	NA	0.0216174	0.228953	0.450499	3.59408	-2.93995	0.999975
C01A2.7	WBGene00007219	chrI	13402435	13404088	27.5988	50.2469	256.705	362.833	0.912932	0.745872	27.5988	37.8548	256.753	366.401	-0.456964	0.999975
C01A2.9	WBGene00077546	chrI	13376864	13377338	0.166651	0.351205	0.35076	0.314793	0.257655	NA	0.166651	0.101412	0.350231	0.502618	-0.465081	0.999975
C01B10.10	WBGene00015284	chrIV	6624359	6627981	3.656	3.11081	138.222	80.4271	-0.367499	0.945973	3.656	3.70277	137.99	140.978	0.0251676	0.999975
C01B10.11	WBGene00044294	chrIV	6657967	6660425	101.832	73.1917	1979.92	1032.19	-0.525995	0.620772	101.832	85.8324	1979.59	1705	0.271504	0.999975
C01B10.3	WBGene00015278	chrIV	6619031	6621341	11.258	8.65254	271.191	155.481	-0.388835	0.874524	11.258	11.7762	271.243	288.279	-0.0318064	0.999975
C01B10.4	WBGene00015279	chrIV	6628341	6631734	0.853646	0.919583	28.5711	21.4961	0.00324806	0.998755	0.853646	0.704144	28.552	25.1611	0.238468	0.999975
C01B10.44	WBGene00194839	chrIV	6623678	6624482	0.126734	0.158482	1.91972	1.19832	-0.266149	NA	0.126734	0.0876694	1.85502	1.00873	0.934968	0.999975
C01B10.5	WBGene00001858	chrIV	6646022	6646928	150.948	284.743	649.213	861.386	0.821702	0.787274	150.948	154.775	649.249	630.373	0.0986396	0.999975
C01B10.6	WBGene00015280	chrIV	6640149	6645341	207.988	213.105	6470.75	4754.27	-0.0309739	0.991345	207.988	256.911	6479.85	7912.5	-0.232099	0.999975
C01B10.7	WBGene00015281	chrIV	6638544	6639253	6.14146	2.5697	25.6051	9.27487	-1.0513	0.945973	6.14146	2.92439	25.7519	12.9875	1.04363	0.999975
C01B10.8	WBGene00015282	chrIV	6635027	6638147	14.9452	14.4658	638.476	412.259	-0.217349	0.948101	14.9452	16.7558	638.633	720.785	-0.118508	0.999975
C01B10.9	WBGene00015283	chrIV	6632210	6634987	11.0392	11.4461	454.28	305.598	-0.158213	0.962306	11.0392	11.9947	454.587	495.638	-0.0686546	0.999975
C01B12.1	WBGene00005017	chrII	23327	24457	411.954	0.471217	1768.83	2.58484	-9.00477	7.05e-28	411.954	334.039	1768.9	1369.8	0.424958	0.999975
C01B12.2	WBGene00015285	chrII	19537	22170	33.9451	0.0755108	992.483	1.28167	-9.18314	2.01e-23	33.9451	36.4327	992.751	1037.74	-0.00786275	0.999975
C01B12.3	WBGene00015286	chrII	12984	16001	4.34339	0.0171809	154.301	0.515917	-7.81066	1.46e-07	4.34339	4.98633	153.988	189.314	-0.241892	0.999975
C01B12.4	WBGene00015287	chrII	6663	9233	1.05688	0.0288755	25.7662	0.314796	-5.94119	0.000662264	1.05688	1.16302	25.6583	31.5397	-0.241665	0.999975
C01B12.5	WBGene00015288	chrII	9807	11846	1.5609	0	52.5951	0.190933	-7.69198	3.33e-07	1.5609	1.25037	52.7113	43.7496	0.324917	0.999975
C01B12.8	WBGene00015291	chrII	23880	25435	3.17815	0.0909153	74.122	1.0436	-5.73653	NA	3.17815	2.64394	74.3736	55.3476	0.482344	NA
C01B4.1	WBGene00006283	chrV	2517528	2521770	0.00519878	0	NA	NA	NA	NA	0.00519878	0.0197625	NA	NA	NA	NA
C01B4.10	WBGene00006136	chrV	2514232	2515592	0.00770125	0	NA	NA	NA	NA	0.00770125	0.0155214	NA	NA	NA	NA
C01B4.3	WBGene00006284	chrV	2509634	2513267	0.0827265	0.112858	NA	NA	NA	NA	0.0827265	0.0768938	NA	NA	NA	NA
C01B4.5	WBGene00005138	chrV	2502762	2504913	0.224374	0.19753	NA	NA	NA	NA	0.224374	0.22445	NA	NA	NA	NA
C01B4.6	WBGene00015270	chrV	2501049	2502425	3.62417	6.09517	NA	NA	NA	NA	3.62417	4.16353	NA	NA	NA	NA
C01B4.7	WBGene00015271	chrV	2494233	2499000	4.19318	14.0704	NA	NA	NA	NA	4.19318	4.55977	NA	NA	NA	NA
C01B4.8	WBGene00015272	chrV	2490510	2492700	1.24523	3.0645	NA	NA	NA	NA	1.24523	1.14024	NA	NA	NA	NA
C01B4.9	WBGene00015273	chrV	2483002	2487784	11.6694	12.4499	NA	NA	NA	NA	11.6694	12.2571	NA	NA	NA	NA
C01B7.1	WBGene00015274	chrV	8786528	8792753	35.057	31.3233	1598.45	1065.88	-0.170898	0.959966	35.057	37.1222	1597.89	1711.64	-0.0431362	0.999975
C01B7.3	WBGene00015275	chrV	8783399	8784143	0	0	NA	NA	NA	NA	0	0	NA	NA	NA	NA
C01B7.4	WBGene00006467	chrV	8792673	8795545	8.07951	7.04711	359.843	234.017	-0.207018	0.959966	8.07951	6.57496	359.595	304.042	0.298179	0.999975
C01B7.5	WBGene00015276	chrV	8800128	8800974	4.57847	2.97456	23.1622	11.2278	-0.63097	0.945973	4.57847	2.65532	23.0754	14.6004	0.716422	0.999975
C01B7.6	WBGene00004457	chrV	8805393	8819933	3.16029	3.1376	433.75	331.075	0.0240302	0.992577	3.16029	2.8243	434.241	423.195	0.0932487	0.999975
C01B7.7	WBGene00015277	chrV	8821843	8822536	0.998361	0.861252	NA	NA	NA	NA	0.998361	1.09526	NA	NA	NA	NA
C01B9.1	WBGene00007220	chrII	13771505	13778956	3.04298	1.79466	299.391	124.385	-0.853484	0.609008	3.04298	2.38665	299.948	237.203	0.394662	0.999975
C01B9.4	WBGene00194890	chrII	13770769	13783947	0	0.141843	0.204021	0.314792	1.03942	NA	0	0.228206	0.204043	0.914612	-2.10821	0.999975
C01C10.1	WBGene00000523	chrX	7431424	7433490	6.42031	3.74047	99.1162	44.3585	-0.746176	0.945973	6.42031	6.53517	99.3491	105.791	-0.0345574	0.999975
C01C10.2	WBGene00015294	chrX	7435751	7437936	13.4619	13.542	159.189	122.638	0.0373961	0.991345	13.4619	15.9401	159.062	200.584	-0.27854	0.999975
C01C10.3	WBGene00015295	chrX	7439353	7442534	10.6866	15.7655	320.119	323.24	0.42773	0.945973	10.6866	14.0571	320.43	425.328	-0.35249	0.999975
C01C10.4	WBGene00000526	chrX	7433586	7435662	11.6355	12.1551	214.124	170.889	0.0883508	0.98111	11.6355	13.7662	214.063	264.82	-0.250901	0.999975
C01C4.1	WBGene00003739	chrX	3727559	3728424	19.8009	38.5836	198.626	309.709	1.0546	0.834912	19.8009	28.9114	198.5	310.412	-0.588968	0.999975
C01C4.2	WBGene00015292	chrX	3716300	3718629	0.299442	0.348222	5.4741	4.29514	0.0638175	0.991095	0.299442	0.356522	5.42488	6.16788	-0.129109	0.999975
C01C4.3	WBGene00015293	chrX	3706728	3713318	21.7682	27.725	696.245	669.15	0.356468	0.945973	21.7682	25.4287	695.986	828.475	-0.195326	0.999975
C01C7.1	WBGene00000186	chrIV	12622060	12630999	21.3067	18.5925	1588.76	941.87	-0.34057	0.945973	21.3067	21.3079	1591.05	1627.88	0.0230532	0.999975
C01F1.1	WBGene00015296	chrII	4301608	4305289	43.3518	33.4413	1438.68	713.464	-0.598097	0.945973	43.3518	45.8767	1441.31	1455.47	0.0419658	0.999975
C01F1.2	WBGene00015297	chrII	4299659	4301276	43.8388	32.7291	854.924	438.645	-0.549008	0.782656	43.8388	55.8306	855.478	1064.47	-0.25925	0.999975
C01F1.3	WBGene00015298	chrII	4295102	4299213	40.191	29.133	1344.57	724.029	-0.479288	0.945973	40.191	29.0905	1344.49	1005.03	0.475895	0.999975
C01F1.4	WBGene00015299	chrII	4276215	4279270	2.15961	3.36529	43.0895	48.745	0.591651	0.945973	2.15961	3.26631	42.9291	66.7443	-0.580614	0.999975
C01F1.5	WBGene00015300	chrII	4279790	4281830	12.618	8.98304	191.913	108.86	-0.404244	0.945973	12.618	8.95107	191.616	139.239	0.516733	0.999975
C01F1.6	WBGene00015301	chrII	4282220	4288212	20.0493	19.0835	823.609	458.937	-0.429929	NA	20.0493	22.7296	826.162	906.226	-0.0773709	NA
C01F4.2	WBGene00015303	chrI	4850682	4867826	5.4837	4.83674	339.423	232.211	-0.133916	0.976137	5.4837	5.83858	339.28	378.155	-0.100427	0.999975
C01F6.1	WBGene00007221	chrIV	9096824	9099472	13.6687	11.3197	594.359	281.774	-0.663061	0.945973	13.6687	14.6712	595.907	609.364	0.0238579	NA
C01F6.2	WBGene00007222	chrIV	9099247	9101570	0.457801	0.83336	14.0416	17.4342	0.725943	0.945973	0.457801	0.441724	13.9453	14.3687	0.0129228	0.999975
C01F6.4	WBGene00001413	chrIV	9104950	9107594	5.54271	5.0321	236.182	112.242	-0.659552	NA	5.54271	5.30786	237.062	210.082	0.230386	NA
C01F6.5	WBGene00000120	chrIV	9108915	9109736	38.4608	45.6593	457.226	417.018	0.280935	0.953645	38.4608	59.2156	457.317	732.457	-0.623477	0.999975
C01F6.6	WBGene00006438	chrIV	9119081	9130369	99.9926	68.9525	3531.99	1683.71	-0.655107	0.564305	99.9926	90.7361	3534.54	3223.46	0.188987	0.999975
C01F6.8	WBGene00002046	chrIV	9094531	9095640	41.2904	44.7418	558.05	417.097	-0.0062776	0.996483	41.2904	44.0825	558.694	593.689	-0.0315742	0.999975
C01F6.9	WBGene00007223	chrIV	9095738	9096218	530.083	499.962	2285.23	1402.49	-0.290622	0.958598	530.083	550.711	2291.34	2283.45	0.0610489	0.999975
C01G10.1	WBGene00007230	chrV	15099729	15104787	0.0965645	0.162075	10.3307	8.9624	0.208759	0.990966	0.0965645	0.0765897	10.3667	7.46509	0.529797	0.999975
C01G10.10	WBGene00007237	chrV	15079863	15082462	3.76653	4.61932	123.418	103.183	0.155394	0.958598	3.76653	3.69897	123.549	120.255	0.0950562	0.999975
C01G10.11	WBGene00006808	chrV	15071506	15080135	54.4001	49.723	2218.55	1013.9	-0.715971	0.904943	54.4001	50.6171	2223.9	2033.8	0.18499	0.999975
C01G10.12	WBGene00001021	chrV	15068672	15069490	5.95089	5.38624	55.849	33.944	-0.30464	0.953645	5.95089	5.35431	56.0168	48.8845	0.252557	0.999975
C01G10.14	WBGene00007239	chrV	15105358	15105910	0.54274	1.3574	0.350765	1.50097	2.51106	NA	0.54274	0.290567	0.350432	0.203769	0.838272	0.999975
C01G10.15	WBGene00007240	chrV	15086933	15087279	140.009	39.9059	312.027	64.9807	-1.84985	0.834912	140.009	122.996	312.657	276.791	0.231859	0.999975
C01G10.16	WBGene00007241	chrV	15092948	15094321	5.79238	9.10879	36.6425	40.15	0.545617	0.946138	5.79238	7.35194	36.588	45.2782	-0.251373	0.999975
C01G10.17	WBGene00044658	chrV	15090739	15091102	14.6532	3.85527	38.7327	7.03095	-2.04802	0.64979	14.6532	9.54795	38.9462	22.6691	0.836831	0.999975
C01G10.18	WBGene00077583	chrV	15088409	15088682	0.235369	0	0.328122	0.190932	-0.367436	NA	0.235369	0	0.328338	0.203769	0.744321	0.999975
C01G10.2	WBGene00005970	chrV	15097656	15099537	0	0.0158748	0.204022	0.476326	1.63696	NA	0	0.0216607	0.204043	0.672839	-1.66531	0.999975
C01G10.3	WBGene00005969	chrV	15095031	15097435	0	0	NA	NA	NA	NA	0	0.0180419	0.204043	0.630931	-1.57254	0.999975
C01G10.4	WBGene00007231	chrV	15089737	15090004	35.407	15.3074	43.7778	15.239	-1.10869	0.89689	35.407	41.9768	43.9698	47.5069	-0.0555501	0.999975
C01G10.5	WBGene00007232	chrV	15089084	15089482	22.8554	24.9307	24.577	17.6383	-0.0648638	0.991345	22.8554	35.3721	24.367	38.6625	-0.609927	0.999975
C01G10.6	WBGene00007233	chrV	15087638	15088319	195.154	141.456	784.128	425.627	-0.467763	0.945973	195.154	208.686	784.721	849.327	-0.0580661	0.999975
C01G10.7	WBGene00007234	chrV	15085729	15087047	10.3818	11.4713	235.302	184.452	0.062471	0.984805	10.3818	10.4505	235.073	237.365	0.0420727	0.999975
C01G10.8	WBGene00007235	chrV	15084040	15085368	113.824	103.748	2342.66	1557.86	-0.174849	0.949003	113.824	112.495	2341.93	2391.09	0.0261043	0.999975
C01G10.9	WBGene00007236	chrV	15082746	15084074	13.0095	9.7136	268.111	155.007	-0.376761	0.945973	13.0095	12.4001	268.04	264.81	0.0735629	0.999975
C01G12.1	WBGene00007242	chrII	14573539	14576487	10.6933	10.2641	349.843	250.791	-0.0664912	0.985519	10.6933	10.2306	349.902	334.621	0.120497	0.999975
C01G12.10	WBGene00007250	chrII	14580255	14580968	12.2538	6.09021	20.6892	8.41054	-0.884877	0.945973	12.2538	5.07909	20.8186	9.70116	1.15772	0.999975
C01G12.11	WBGene00007251	chrII	14580817	14581202	7.9609	2.17959	21.0672	2.78518	-2.50542	0.691003	7.9609	3.55614	21.3739	9.01046	1.30225	0.999975
C01G12.13	WBGene00044333	chrII	14576881	14578000	0.217355	0.46837	3.74619	4.71013	0.74408	0.959966	0.217355	0.169788	3.69604	2.53972	0.597385	0.999975
C01G12.2	WBGene00007243	chrII	14578209	14578522	12.4002	6.65975	23.7476	7.87181	-1.17928	0.945973	12.4002	6.14013	23.9062	15.2956	0.700337	0.999975
C01G12.3	WBGene00007244	chrII	14581389	14582285	0.497231	1.65723	6.86537	12.2479	1.24886	0.945973	0.497231	0.595436	6.90095	7.41423	-0.0474264	0.999975
C01G12.5	WBGene00007245	chrII	14586451	14587432	0.185202	0.0642333	2.72923	0.732395	-1.48406	NA	0.185202	0.0596665	2.77581	0.898798	1.68291	0.999975
C01G12.6	WBGene00007246	chrII	14587881	14588186	15.2093	12.5246	28.0314	22.7091	0.109963	0.989836	15.2093	5.03255	28.0047	10.2026	1.5128	0.999975
C01G12.7	WBGene00007247	chrII	14588545	14591818	2.33894	4.27188	83.2411	115.061	0.880767	0.945973	2.33894	4.55555	83.1514	168.525	-0.963077	0.999975
C01G12.8	WBGene00007248	chrII	14593448	14597565	0.440055	1.32736	38.7452	59.083	1.02246	NA	0.440055	0.446642	38.8668	35.4531	0.188701	NA
C01G12.9	WBGene00007249	chrII	14578943	14580023	0.077614	0.258817	1.91969	2.71188	0.912159	NA	0.077614	0.071128	1.90439	1.10398	0.842691	0.999975
C01G5.2	WBGene00004179	chrIV	6526712	6529791	8.12175	10.3808	393.771	305.348	0.0468289	0.993677	8.12175	7.74416	395.207	363.259	0.177683	0.999975
C01G5.3	WBGene00015305	chrIV	6536167	6538989	0.867894	0.931202	2.37997	7.26015	2.02279	0.945973	0.867894	0.731646	2.39874	5.64728	-1.17921	0.999975
C01G5.4	WBGene00015306	chrIV	6531738	6535666	0.117998	0.31369	15.6516	16.5951	0.498185	NA	0.117998	0.0532859	15.6932	5.77795	1.49759	NA
C01G5.5	WBGene00015307	chrIV	6524596	6526485	5.26471	6.74512	107.382	88.4184	0.133407	0.98246	5.26471	5.43587	107.833	109.526	0.0335928	0.999975
C01G5.6	WBGene00015308	chrIV	6522862	6524557	29.9295	28.4476	883.56	520.427	-0.349897	0.957525	29.9295	30.651	885.328	868.355	0.0840013	0.999975
C01G5.7	WBGene00015309	chrIV	6518162	6519023	2.11323	1.25289	8.67198	3.65485	-0.832815	0.947937	2.11323	2.48602	8.76273	10.9952	-0.271344	0.999975
C01G5.8	WBGene00015310	chrIV	6548839	6552556	2.52864	2.55448	165.213	97.0248	-0.354165	NA	2.52864	2.53044	165.596	162.773	0.0808811	NA
C01G5.9	WBGene00015311	chrIV	6519963	6522292	0.584324	0.416316	15.4519	7.68525	-0.593881	0.945973	0.584324	0.360462	15.431	9.48704	0.757881	0.999975
C01G6.1	WBGene00000170	chrII	9258852	9261934	825.961	1050.4	17339.4	16608.3	0.351582	0.945973	825.961	1061.92	17340.1	22783.9	-0.337827	0.999975
C01G6.2	WBGene00007224	chrII	9267275	9268243	0.359357	0.699515	6.27399	5.42415	0.203747	0.990966	0.359357	0.175913	6.16801	3.36445	0.930506	0.999975
C01G6.3	WBGene00007225	chrII	9269831	9271475	10.5983	11.0848	340.73	180.139	-0.505781	NA	10.5983	10.8114	342.181	320.649	0.149839	NA
C01G6.4	WBGene00007226	chrII	9271201	9272984	80.2162	102.639	1424.41	929.019	-0.202846	0.972136	80.2162	96.9656	1426.72	1719.05	-0.212839	0.999975
C01G6.5	WBGene00007227	chrII	9274848	9280038	57.0356	48.0331	4675.47	2606.81	-0.42909	0.945973	57.0356	57.098	4678.98	4719.43	0.0436572	0.999975
C01G6.6	WBGene00006510	chrII	9285633	9289076	39.9082	27.7177	1104.51	594.818	-0.479148	0.945973	39.9082	28.8658	1104.01	822.727	0.480338	0.999975
C01G6.7	WBGene00007228	chrII	9291956	9293981	19.1398	26.6122	579.665	584.289	0.425197	0.945973	19.1398	16.053	579.066	514.938	0.225406	0.999975
C01G6.8	WBGene00000289	chrII	9295855	9310242	19.9979	19.8157	1362.92	905.345	-0.176426	0.954286	19.9979	19.6413	1363.16	1349.16	0.0709657	0.999975
C01G6.9	WBGene00007229	chrII	9293976	9295693	0.456648	0.486502	10.5695	7.74284	-0.0352378	0.993677	0.456648	0.39285	10.4179	8.5854	0.335176	0.999975
C01G8.1	WBGene00015312	chrI	5272848	5274325	35.3765	22.3278	1100.91	340.259	-1.28026	NA	35.3765	39.6333	1105.78	1122.12	0.0349147	NA
C01G8.2	WBGene00000540	chrI	5274698	5278711	6.29085	6.99998	161.31	128.498	0.0856412	0.974731	6.29085	7.28995	161.027	192.223	-0.199404	0.999975
C01G8.3	WBGene00000965	chrI	5278806	5281519	15.0208	13.3696	379.948	206.649	-0.464883	0.945973	15.0208	17.8849	380.916	436.3	-0.139772	0.999975
C01G8.4	WBGene00001022	chrI	5282085	5283944	4.40681	6.47827	79.7262	84.3251	0.494642	0.898891	4.40681	5.66586	79.6669	104.314	-0.332803	0.999975
C01G8.5	WBGene00001333	chrI	5284059	5291608	208.183	124.501	10375.1	3968.56	-0.972708	0.572832	208.183	165.638	10391.8	7818.14	0.466625	0.999975
C01G8.6	WBGene00015313	chrI	5298757	5300334	7.68024	10.8001	228.544	176.383	0.0399724	NA	7.68024	7.7878	229.445	221.459	0.107184	NA
C01G8.9	WBGene00002717	chrI	5300953	5310917	65.7774	53.1432	9113.77	4502.9	-0.603459	0.945973	65.7774	63.0477	9129.3	8633.05	0.136708	0.999975
C01H6.1	WBGene00000637	chrI	7202180	7203506	4.66615	6.03469	72.0377	75.6064	0.48349	0.945973	4.66615	4.03507	71.8847	64.5029	0.212394	0.999975
C01H6.2	WBGene00007252	chrI	7204542	7207715	3.40367	2.94873	141.95	89.4818	-0.25198	0.952509	3.40367	2.53594	142.054	111.727	0.402532	0.999975
C01H6.3	WBGene00007253	chrI	7208024	7209864	1.64494	0.95777	27.4948	11.3246	-0.86596	0.874513	1.64494	1.37926	27.5512	24.7891	0.208484	0.999975
C01H6.4	WBGene00007254	chrI	7210540	7212697	3.32945	1.57663	94.8427	32.7227	-1.12151	0.493373	3.32945	2.47934	95.4424	74.0346	0.422506	0.999975
C01H6.5	WBGene00003622	chrI	7214742	7221804	32.1898	17.6796	1803.22	502.78	-1.42885	NA	32.1898	27.5749	1808.64	1482.75	0.342706	NA
C01H6.6	WBGene00007255	chrI	7222048	7224133	1.47108	1.88873	45.165	36.5938	0.110127	0.987584	1.47108	1.51353	45.2361	47.6986	-0.0203983	0.999975
C01H6.7	WBGene00007256	chrI	7224653	7227763	19.676	17.7699	944.565	542.353	-0.386685	0.945973	19.676	21.9654	946.036	1052.24	-0.0974278	0.999975
C01H6.8	WBGene00007257	chrI	7227861	7229433	14.7896	8.27112	160.36	76.3152	-0.657538	0.842254	14.7896	11.0535	160.471	146.226	0.190194	0.999975
C01H6.9	WBGene00007258	chrI	7229415	7233118	3.12519	2.51609	217.292	104.864	-0.637381	0.945973	3.12519	2.97844	217.714	198.984	0.185859	0.999975
C02A12.1	WBGene00001781	chrV	3467449	3468498	1.43163	2.11939	15.7737	16.873	0.510931	0.945973	1.43163	1.29754	15.7334	15.0582	0.11935	0.999975
C02A12.10	WBGene00044090	chrV	3483087	3484778	0.051513	0.0639745	0.77436	0.714931	0.298535	NA	0.051513	0.168213	0.770245	2.60582	-1.70227	0.999975
C02A12.2	WBGene00015315	chrV	3469441	3470879	0	0	0.204021	0.314792	1.03942	NA	0	0.0108328	0.204042	0.331132	-0.642465	0.999975
C02A12.3	WBGene00015316	chrV	3478027	3480443	0	0	NA	NA	NA	NA	0	0	NA	NA	NA	NA
C02A12.4	WBGene00003096	chrV	3481415	3482599	174.015	407.798	2474.52	4724.82	1.34685	0.634916	174.015	245.765	2476.99	3499.14	-0.442335	0.999975
C02A12.5	WBGene00015317	chrV	3485545	3486954	0.0153975	0.0316005	0.44513	0.314794	-0.0860845	NA	0.0153975	0.036499	0.445656	0.712586	-0.621058	0.999975
C02A12.6	WBGene00015318	chrV	3489224	3490532	0	0.0145866	0.204021	0.314792	1.03942	NA	0	0.0459633	0.204043	0.86296	-2.02434	0.999975
C02A12.8	WBGene00044088	chrV	3471866	3475118	0	0.0104332	0.204021	0.314792	1.03942	NA	0	0	0.204042	0.331132	-0.642465	0.999975
C02A12.9	WBGene00044089	chrV	3476401	3477593	0	0	0.35076	0.314793	0.257655	NA	0	0	0.350433	0.331133	0.137803	0.999975
C02B10.1	WBGene00015326	chrIV	5086324	5088870	64.7014	95.1395	2231.03	2484.3	0.568862	0.85482	64.7014	57.2852	2230.85	1968.26	0.236751	0.999975
C02B10.2	WBGene00015327	chrIV	5090281	5091101	33.2737	25.4041	475.582	209.915	-0.766149	NA	33.2737	31.4836	477.423	422.721	0.231636	NA
C02B10.3	WBGene00015328	chrIV	5092799	5103273	70.7349	75.5793	1188.23	911.082	0.0305775	0.990966	70.7349	82.7876	1186.88	1301.19	-0.0765798	0.999975
C02B10.4	WBGene00015329	chrIV	5091575	5092800	65.5955	76.2745	918.645	697.877	0.0172002	0.99418	65.5955	80.7474	920.46	1081.2	-0.176136	0.999975
C02B10.5	WBGene00015330	chrIV	5083294	5086879	38.5662	29.7114	2320.36	1093.65	-0.671461	NA	38.5662	37.3505	2326.16	2164.23	0.160171	NA
C02B10.6	WBGene00015331	chrIV	5070922	5072221	0.279626	1.03154	0.35076	0.314793	0.257655	NA	0.279626	0.314693	0.350438	1.45952	-2.00219	0.999975
C02B4.1	WBGene00000082	chrX	12678759	12689207	5.82792	3.73272	568.013	272.431	-0.646297	0.945973	5.82792	2.86033	567.623	286.534	1.0423	0.999975
C02B4.2	WBGene00003616	chrX	12663723	12667782	26.8871	49.3886	804.863	1225.12	1.01984	0.812162	26.8871	34.4977	804.64	1096.75	-0.390742	0.999975
C02B4.3	WBGene00007259	chrX	12658404	12660991	0	0	NA	NA	NA	NA	0	0.0222156	0.204043	0.45836	-1.11154	0.999975
C02B4.4	WBGene00045386	chrX	12662402	12663553	23.6706	51.8129	98.2065	178.716	1.27751	0.780784	23.6706	36.8209	98.1294	160.032	-0.649527	0.999975
C02B8.1	WBGene00015320	chrX	8147660	8148539	0.500476	1.0964	3.55469	6.49513	1.28337	0.945973	0.500476	0.231378	3.52984	2.05985	0.833141	0.999975
C02B8.2	WBGene00015321	chrX	8144383	8144978	0.0237192	0.029661	NA	NA	NA	NA	0.0237192	0.014631	NA	NA	NA	NA
C02B8.3	WBGene00015322	chrX	8139472	8140184	19.7691	36.7109	187.325	268.63	0.933816	0.74304	19.7691	24.89	187.581	238.286	-0.28911	0.999975
C02B8.4	WBGene00001953	chrX	8116586	8120057	5.9608	6.57283	46.0568	35.1371	0.0233177	0.993677	5.9608	7.01337	46.1069	54.9614	-0.19736	0.999975
C02B8.5	WBGene00015323	chrX	8120360	8125707	0.694253	1.05295	27.4213	27.102	0.396837	0.952509	0.694253	0.931148	27.3703	40.2315	-0.499637	0.999975
C02B8.6	WBGene00015324	chrX	8133099	8136279	5.41388	4.40793	215.362	109.206	-0.565975	0.945973	5.41388	5.06223	215.924	193.562	0.213808	0.999975
C02B8.7	WBGene00015325	chrX	8137671	8137830	0	0	0.204021	0.314792	1.03942	NA	0	0.658308	0.204043	0.45836	-1.11154	0.999975
C02C2.1	WBGene00015332	chrIII	7873714	7877041	20.4621	28.5275	848.013	820.372	0.365925	0.945973	20.4621	19.5485	847.604	813.606	0.115136	0.999975
C02C2.3	WBGene00000845	chrIII	7866442	7868661	6.25988	5.45221	159.495	97.8528	-0.291087	0.945973	6.25988	6.36333	159.491	165.788	0.000209843	0.999975
C02C2.4	WBGene00015333	chrIII	7862512	7865222	2.31426	1.28947	77.1174	33.7258	-0.779471	0.870506	2.31426	1.88045	77.0466	65.9347	0.280768	0.999975
C02C2.5	WBGene00015334	chrIII	7877146	7878774	2.56455	3.62849	55.4324	53.4339	0.360759	0.945973	2.56455	2.57093	55.3061	55.0351	0.0631628	0.999975
C02C6.1	WBGene00001130	chrX	15568847	15573627	50.0366	48.6794	3150.19	2135.75	-0.146963	0.945973	50.0366	54.4428	3150.68	3457.16	-0.0778506	0.999975
C02C6.2	WBGene00007260	chrX	15537593	15546646	19.19	22.9588	808.05	781.628	0.365772	0.951189	19.19	20.5628	807.251	934.309	-0.154809	0.999975
C02C6.3	WBGene00007261	chrX	15546638	15552165	51.6385	51.3478	1058.11	806.146	0.0213634	0.992576	51.6385	44.051	1058.41	957.213	0.201057	0.999975
C02D4.1	WBGene00007262	chrX	15284137	15286158	1.86524	2.09066	29.11	25.8243	0.24095	0.974337	1.86524	1.25087	28.9112	19.6353	0.614253	0.999975
C02D4.2	WBGene00004777	chrX	15286509	15302894	3.26626	3.44778	70.2332	55.9082	0.084642	0.989836	3.26626	2.55878	70.2624	66.8672	0.127528	0.999975
C02D5.1	WBGene00015335	chrIII	8561104	8562892	6.16711	7.14472	138.086	117.472	0.180487	0.967345	6.16711	6.61867	137.581	147.951	-0.048765	0.999975
C02D5.2	WBGene00015336	chrIII	8557254	8559114	12.628	11.3409	220.161	138.342	-0.256587	0.957214	12.628	10.7132	219.88	203.483	0.167886	0.999975
C02D5.3	WBGene00015337	chrIII	8554691	8555741	0.347796	0.353902	5.28215	4.08029	0.0412806	0.99418	0.347796	0.575846	5.42054	9.34577	-0.729802	0.999975
C02D5.4	WBGene00043097	chrIII	8552472	8553757	51.1231	79.3371	704.193	815.866	0.626095	0.834912	51.1231	53.7058	703.972	762.575	-0.059286	0.999975
C02E11.1	WBGene00015344	chrV	1042692	1048583	80.5839	56.1048	6006.52	2948.87	-0.612634	0.636415	80.5839	71.1047	6007.16	5342.9	0.225134	0.999975
C02E7.1	WBGene00015338	chrV	4934723	4939071	0.0509355	0.0799061	3.65257	4.66299	0.766076	0.959213	0.0509355	0.0851298	3.7888	5.59969	-0.507531	0.999975
C02E7.10	WBGene00015342	chrV	4930802	4933013	0.179763	0.157658	3.6024	3.5172	0.379203	NA	0.179763	0.283582	3.66562	6.78876	-0.833016	0.999975
C02E7.13	WBGene00006244	chrV	4943101	4944305	0.0158161	0	0.445129	0.190933	-0.807424	NA	0.0158161	0	0.445655	0.331134	0.484588	0.999975
C02E7.2	WBGene00005246	chrV	4926656	4928181	0.21678	0.110523	4.32143	1.72486	-0.911299	NA	0.21678	0.174153	4.35957	3.89577	0.218351	0.999975
C02E7.3	WBGene00005245	chrV	4924903	4926210	0.0984131	0	1.55376	0.190934	-2.61088	NA	0.0984131	0.116225	1.61849	1.99541	-0.245959	0.999975
C02E7.4	WBGene00005247	chrV	4923277	4924580	0.221087	0.04253	3.31565	0.728096	-1.77336	NA	0.221087	0.143065	3.308	2.49307	0.464112	0.999975
C02E7.5	WBGene00005248	chrV	4921087	4922602	0.17651	0.0447082	3.27163	0.644327	-1.93041	NA	0.17651	0.0871742	3.17787	1.66741	0.986529	0.999975
C02E7.6	WBGene00015339	chrV	4919192	4919567	2304.86	1812.14	5518.84	3573.53	-0.21328	0.974337	2304.86	2070	5508.98	5012.92	0.192209	0.999975
C02E7.7	WBGene00015340	chrV	4918139	4918571	1532.04	1638.13	3179.52	2982.96	0.321666	0.973459	1532.04	1614.02	3171.83	3407.47	-0.0473118	0.999975
C02E7.8	WBGene00015341	chrV	4920327	4920776	0	0	NA	NA	NA	NA	0	0	NA	NA	NA	NA
C02E7.9	WBGene00006238	chrV	4928263	4929928	0	0.0123301	0.204021	0.314792	1.03942	NA	0	0.0190155	0.204043	0.712583	-1.74811	0.999975
C02F12.1	WBGene00006643	chrX	3681154	3684219	3.0806	4.44553	60.6191	70.4279	0.630108	0.945973	3.0806	3.36426	60.6566	67.694	-0.102289	0.999975
C02F12.10	WBGene00045215	chrX	3672263	3673905	0.784433	1.38768	9.7214	12.8887	0.8206	0.898891	0.784433	1.09606	9.68763	14.7703	-0.552409	0.999975
C02F12.3	WBGene00015354	chrX	3668086	3668929	118.192	198.335	1138.24	1379.73	0.691322	0.870705	118.192	164.76	1137.92	1610.82	-0.445327	0.999975
C02F12.4	WBGene00006431	chrX	3674029	3678546	8.1393	19.5094	352.574	598.408	1.17694	0.0515518	8.1393	8.84037	351.995	389.545	-0.0901579	0.999975
C02F12.5	WBGene00015355	chrX	3670359	3672045	4.80414	14.395	51.3424	109.093	1.50106	0.438238	4.80414	6.08419	51.5093	67.4303	-0.332488	0.999975
C02F12.7	WBGene00015356	chrX	3684210	3689194	28.0081	28.2321	1966.28	1519.72	0.0420705	0.990966	28.0081	25.6312	1963.68	1886.49	0.113931	0.999975
C02F12.8	WBGene00015357	chrX	3690153	3693225	3.21846	3.92119	159.229	120.661	0.0135912	0.996419	3.21846	3.68128	159.621	180.163	-0.118575	0.999975
C02F12.9	WBGene00015358	chrX	3696889	3700794	0.562543	0.458242	7.47439	4.19765	-0.41864	0.958598	0.562543	0.615976	7.55026	8.87682	-0.177443	0.999975
C02F4.1	WBGene00000419	chrIV	10484089	10492932	8.46344	6.78092	1116.75	561.483	-0.57826	0.945973	8.46344	7.52561	1118.74	985.519	0.238993	0.999975
C02F4.2	WBGene00006527	chrIV	10492865	10501579	83.5978	86.967	4612.79	2870.77	-0.270469	0.945973	83.5978	82.5333	4613.32	4723.48	0.0220288	0.999975
C02F4.4	WBGene00007264	chrIV	10513869	10515263	25.4299	26.6157	360.255	288.397	0.0927753	0.985519	25.4299	19.3272	360.117	282.229	0.407674	0.999975
C02F4.5	WBGene00007265	chrIV	10523414	10524125	0	0	NA	NA	NA	NA	0	0	NA	NA	NA	NA
C02F5.1	WBGene00002231	chrIII	8250564	8254251	14.7951	12.2667	1196.26	588.58	-0.609485	0.945973	14.7951	13.8349	1199.56	1086.97	0.198264	NA
C02F5.10	WBGene00015351	chrIII	8248613	8249410	0.342163	0.950592	2.32352	4.45543	1.35299	NA	0.342163	0.214938	2.31828	1.80394	0.417984	0.999975
C02F5.11	WBGene00006628	chrIII	8236845	8237822	1.66633	1.03069	20.6719	9.5075	-0.706798	0.948602	1.66633	2.31189	21.1388	30.1815	-0.457698	0.999975
C02F5.12	WBGene00015352	chrIII	8240806	8242932	10.0415	10.8051	242.941	189.443	0.0548892	0.988868	10.0415	9.14875	242.928	232.307	0.120571	0.999975
C02F5.13	WBGene00015353	chrIII	8247276	8248745	4.66446	5.7118	65.955	52.6137	0.0876903	0.985519	4.66446	5.5944	66.2306	77.9463	-0.178907	0.999975
C02F5.14	WBGene00044445	chrIII	8234451	8235458	35.9303	11.8712	215.77	51.6171	-1.64984	0.870705	35.9303	29.1844	215.979	181.862	0.304116	0.999975
C02F5.2	WBGene00015345	chrIII	8249565	8250122	0.138369	0.5689	0.70468	1.99227	1.91311	NA	0.138369	0.505818	0.707573	2.74922	-1.902	0.999975
C02F5.3	WBGene00015346	chrIII	8245817	8247188	43.3648	56.6848	859.866	852.374	0.401109	0.883168	43.3648	47.4573	859.309	995.361	-0.155969	0.999975
C02F5.4	WBGene00015347	chrIII	8244371	8245723	10.3769	9.44577	231.83	133.317	-0.384469	0.950167	10.3769	11.1014	232.541	247.209	-0.0321759	0.999975
C02F5.5	WBGene00015348	chrIII	8236074	8236835	0.240156	1.12443	2.66601	7.54945	1.91542	0.945973	0.240156	0.25315	2.60029	2.74843	-0.0238645	0.999975
C02F5.6	WBGene00015349	chrIII	8232577	8234463	3.80728	6.51856	77.3549	74.5153	0.35978	0.958598	3.80728	5.44719	77.4227	102.714	-0.351724	0.999975
C02F5.7	WBGene00015350	chrIII	8229653	8233595	23.1267	49.3514	602.904	1021.97	1.17508	0.170469	23.1267	26.4874	602.38	789.237	-0.33371	0.999975
C02F5.8	WBGene00006627	chrIII	8237923	8239352	2.88756	2.05991	42.8145	21.5224	-0.578525	0.953771	2.88756	3.38319	43.231	51.7585	-0.203653	0.999975
C02F5.9	WBGene00003952	chrIII	8243047	8244023	205.269	183.109	3374.5	1987.48	-0.350001	0.947937	205.269	193.213	3382.02	3104.59	0.179556	0.999975
C02G6.1	WBGene00015359	chrV	5876352	5879925	1.37094	0.748494	72.4146	28.0909	-0.952443	0.647424	1.37094	1.26338	72.4245	69.2905	0.119894	0.999975
C02G6.2	WBGene00015360	chrV	5872066	5874897	0.107598	0.230414	3.63412	6.76538	1.3103	0.950129	0.107598	0.0529488	3.59043	1.56475	1.2543	0.999975
C02G6.3	WBGene00044803	chrV	5881093	5882433	4.40104	3.91049	37.0324	19.7862	-0.49056	0.945973	4.40104	3.34484	36.9436	22.9469	0.743101	0.999975
C02H6.1	WBGene00015361	chrV	7388370	7389852	0.032536	0.0128381	0.587282	0.314794	-0.485909	NA	0.032536	0	0.584175	0.20377	1.57553	0.999975
C02H6.2	WBGene00015362	chrV	7390507	7392068	6.22612	3.01659	118.152	42.1807	-1.07225	0.702263	6.22612	4.79265	118.554	95.528	0.367621	0.999975
C02H7.1	WBGene00001127	chrX	763767	766732	2.71972	3.65478	81.6599	87.1615	0.507799	0.945973	2.71972	2.97741	81.5996	94.1783	-0.150758	0.999975
C02H7.2	WBGene00015364	chrX	731158	735671	0.727273	0.858591	18.327	17.8289	0.373985	0.954286	0.727273	0.702653	18.3414	19.0169	0.00389553	0.999975
C02H7.3	WBGene00000086	chrX	751209	759731	7.46763	7.7383	663.409	504.613	0.019012	0.993677	7.46763	6.87312	663.341	636.824	0.114929	0.999975
C03A3.1	WBGene00007266	chrX	11257295	11260160	5.99091	4.44701	121.775	64.1586	-0.510773	0.928376	5.99091	5.90548	122.241	123.424	0.0421713	0.999975
C03A3.2	WBGene00007267	chrX	11262780	11266258	45.8213	28.2777	1957.87	762.904	-0.945975	0.702341	45.8213	42.7496	1961.56	1760.55	0.212046	0.999975
C03A3.3	WBGene00007268	chrX	11267325	11268966	0.564837	0.585449	7.99864	5.99119	-0.00317832	0.999286	0.564837	0.500666	7.96665	7.19753	0.202546	0.999975
C03A7.10	WBGene00015368	chrV	5170897	5172917	0.254849	0.808465	4.37179	9.52239	1.53683	0.727528	0.254849	0.385081	4.43751	6.46849	-0.487603	0.999975
C03A7.11	WBGene00015369	chrV	5175009	5177240	2.79776	4.93409	84.9647	106.673	0.74199	0.945973	2.79776	3.22659	84.6704	102.365	-0.217713	0.999975
C03A7.12	WBGene00015370	chrV	5178319	5181440	0.154402	1.21531	3.33065	13.6683	2.4507	NA	0.154402	0.21962	3.17145	4.11433	-0.319444	0.999975
C03A7.13	WBGene00015371	chrV	5191113	5192515	0.195435	1.04794	3.90461	10.5133	1.8427	0.927219	0.195435	0.158798	3.70876	2.65709	0.537162	0.999975
C03A7.14	WBGene00000031	chrV	5192976	5194592	67.8411	93.5479	1246.92	1505.29	0.685409	0.945973	67.8411	50.705	1246.66	961.171	0.431282	0.999975
C03A7.2	WBGene00015366	chrV	5181895	5183701	0.00428865	0	0.204021	0.314792	1.03942	NA	0.00428865	0.0128278	0.204043	0.885494	-2.06153	0.999975
C03A7.3	WBGene00005887	chrV	5165709	5167225	0	0	NA	NA	NA	NA	0	0.00847153	0.204042	0.331132	-0.642465	0.999975
C03A7.4	WBGene00004099	chrV	5158607	5159882	38.83	37.3612	463.405	348.754	0.00367103	0.998755	38.83	26.6621	463.692	310.591	0.634223	0.999975
C03A7.5	WBGene00005929	chrV	5154041	5155501	0.259059	0.193038	4.12481	2.77048	-0.160454	NA	0.259059	0.475631	4.16587	7.79871	-0.848541	0.999975
C03A7.6	WBGene00005930	chrV	5156637	5157745	0	0	NA	NA	NA	NA	0	0	NA	NA	NA	NA
C03A7.7	WBGene00000029	chrV	5160586	5161877	24.8603	22.7531	107.151	39.8039	-1.01492	0.945973	24.8603	15.9455	107.412	47.919	1.22056	0.999975
C03A7.8	WBGene00000030	chrV	5163379	5164743	34.4188	36.3674	111.469	46.3148	-0.85336	0.945973	34.4188	23.6944	111.659	49.8699	1.21894	0.999975
C03A7.9	WBGene00015367	chrV	5168258	5169670	0.0390327	0.062718	0.80655	0.759963	0.327901	NA	0.0390327	0.0728352	0.864843	1.52358	-0.760879	0.999975
C03B1.1	WBGene00015372	chrX	6373611	6375555	0	0.0298075	0.328124	0.654047	1.40889	NA	0	0.0374859	0.328644	0.906288	-1.40737	0.999975
C03B1.10	WBGene00015380	chrX	6357710	6357919	1.47609	2.27982	NA	NA	NA	NA	1.47609	1.31661	0.204043	0.588799	-1.47283	0.999975
C03B1.12	WBGene00003053	chrX	6376400	6377651	273.687	278.324	5105.96	3394.8	-0.175121	0.956137	273.687	295.498	5107.39	5647.44	-0.0889356	0.999975
C03B1.13	WBGene00015381	chrX	6335238	6337787	3.80398	5.15702	106.274	100.963	0.339769	0.945973	3.80398	3.99472	106.185	111.743	-0.0175338	0.999975
C03B1.14	WBGene00015382	chrX	6359371	6360724	3.43689	2.68387	49.9349	27.7839	-0.432063	0.945973	3.43689	3.52211	49.8823	51.1439	0.0200419	0.999975
C03B1.2	WBGene00015373	chrX	6367577	6373121	0.31065	0.403068	4.84926	5.02465	0.464992	0.958598	0.31065	0.396942	4.85419	6.03843	-0.258868	0.999975
C03B1.3	WBGene00015374	chrX	6365976	6366795	0.121207	0.089606	0.35076	0.314793	0.257655	NA	0.121207	0	0.350435	0.546257	-0.584359	0.999975
C03B1.4	WBGene00015375	chrX	6364459	6365681	0.0593254	0.0727746	0.775049	0.961525	0.724771	NA	0.0593254	0.172438	0.837191	2.83969	-1.70603	0.999975
C03B1.5	WBGene00015376	chrX	6355548	6357745	0.851212	0.713359	32.1207	15.6937	-0.619581	0.945973	0.851212	0.803847	31.9674	25.8484	0.362602	0.999975
C03B1.6	WBGene00015377	chrX	6350150	6351840	0.188625	0.03415	1.8203	0.570767	-1.25947	NA	0.188625	0.194584	1.80283	2.31205	-0.302834	0.999975
C03B1.7	WBGene00015378	chrX	6342119	6345993	1.65032	1.34164	90.144	50.0991	-0.433713	0.945973	1.65032	1.4268	90.2168	78.0824	0.264472	0.999975
C03B1.9	WBGene00015379	chrX	6346322	6347077	0	0	NA	NA	NA	NA	0	0.0241715	0.204042	0.343882	-0.696972	0.999975
C03B8.2	WBGene00015385	chrIII	7715425	7716381	1.23483	2.4727	4.83811	5.94205	0.710251	0.954286	1.23483	1.48781	4.78256	7.40458	-0.574561	0.999975
C03B8.3	WBGene00015386	chrIII	7712265	7717253	0.339979	0.578615	6.0061	5.31727	0.237992	0.984051	0.339979	0.506155	5.81269	7.77815	-0.364147	0.999975
C03B8.4	WBGene00003002	chrIII	7700068	7709407	20.0621	16.8277	3267.49	1773.74	-0.467658	0.945973	20.0621	19.0119	3272.2	3153.68	0.109297	0.999975
C03C10.1	WBGene00002202	chrIII	4083977	4086618	298.564	247.291	12167.5	6416.46	-0.509451	0.945973	298.564	277.978	12189.2	10836.3	0.2258	0.999975
C03C10.2	WBGene00007269	chrIII	4091051	4093254	0.093114	0.372607	2.91528	5.13391	1.23016	0.966112	0.093114	0.175434	2.86807	4.98496	-0.741424	0.999975
C03C10.3	WBGene00004392	chrIII	4093279	4094899	56.0459	55.2175	1642.24	1010.69	-0.286594	0.959966	56.0459	53.3563	1645.81	1537.41	0.154371	0.999975
C03C10.4	WBGene00007270	chrIII	4096874	4098107	53.7459	54.0009	983.76	634.042	-0.219993	0.959966	53.7459	63.6313	985.53	1119.93	-0.128356	0.999975
C03C10.5	WBGene00007271	chrIII	4090265	4090532	0.42487	2.90282	0.446583	1.70847	2.34944	NA	0.42487	2.81593	0.469153	1.97374	-2.01673	0.999975
C03C10.7	WBGene00007273	chrIII	4096018	4097114	0.0574368	0.139169	0.721976	1.09098	1.00934	NA	0.0574368	0.0169023	0.717508	0.343441	1.11901	0.999975
C03C10.9	WBGene00185075	chrIII	4089777	4089912	5.3431	9.56275	0.723128	0.895109	0.721546	NA	5.3431	11.4614	0.659577	1.73719	-1.34107	0.999975
C03C11.1	WBGene00007274	chrI	10014720	10015487	0.487833	2.03593	6.07442	14.269	1.6458	0.945973	0.487833	0.889123	6.00131	9.7844	-0.649132	0.999975
C03C11.2	WBGene00001483	chrI	10016767	10018105	1.60368	3.70898	31.5243	43.8544	0.889991	0.945973	1.60368	2.2216	31.5299	43.0034	-0.391655	0.999975
C03D6.1	WBGene00007275	chrI	9668469	9670706	6.46016	6.56916	111.082	83.1515	-0.00407854	0.998161	6.46016	6.21689	111.126	109.82	0.0731341	0.999975
C03D6.3	WBGene00000466	chrI	9665245	9668655	11.4638	12.1729	513.948	363.49	-0.0859698	0.980453	11.4638	11.0486	514.302	490.411	0.124697	0.999975
C03D6.4	WBGene00003800	chrI	9660165	9665135	26.7077	20.5627	2909.78	1355.14	-0.688736	0.945973	26.7077	26.128	2915.99	2775.23	0.127455	0.999975
C03D6.5	WBGene00007277	chrI	9658264	9660064	5.02096	6.7615	118.725	80.5841	-0.145317	NA	5.02096	5.62429	119.269	121.182	0.0331116	NA
C03D6.6	WBGene00007278	chrI	9657048	9657841	3.05505	3.72084	39.5049	24.4776	-0.276834	NA	3.05505	3.69567	39.7005	45.0009	-0.124719	NA
C03D6.8	WBGene00004437	chrI	9669403	9670132	152.876	299.646	1244.74	1791.33	0.938926	0.307917	152.876	184.083	1245.23	1543.67	-0.253879	0.999975
C03E10.1	WBGene00007279	chrV	11291169	11292551	0	0	0.204021	0.314792	1.03942	NA	0	0	NA	NA	NA	NA
C03E10.3	WBGene00007281	chrV	11286959	11288208	1.39901	1.09015	23.8866	14.2678	-0.329707	0.958598	1.39901	1.31595	23.84	23.3891	0.0836187	0.999975
C03E10.4	WBGene00001645	chrV	11282551	11286024	26.974	21.2062	1114.51	522.09	-0.680307	0.945973	26.974	29.1155	1116.71	1181.78	-0.0256313	0.999975
C03E10.5	WBGene00007282	chrV	11273129	11278141	100.97	20.5732	604.511	167.496	-1.43791	NA	100.97	85.0256	607.223	662.602	-0.0698407	NA
C03E10.6	WBGene00007283	chrV	11271332	11272451	3.7323	4.76153	71.4337	44.3409	-0.274234	NA	3.7323	4.57592	71.7328	79.7229	-0.0962863	NA
C03F11.1	WBGene00015387	chrX	5390697	5394108	1.20521	1.23239	29.6532	23.0808	0.0522433	0.990966	1.20521	0.824099	29.6122	22.0056	0.484398	0.999975
C03F11.2	WBGene00015388	chrX	5394530	5396896	1.35042	1.02075	30.1509	14.2138	-0.67117	0.945973	1.35042	0.993271	30.2436	21.9184	0.520562	0.999975
C03F11.3	WBGene00015389	chrX	5397643	5400552	28.0998	23.4505	941.732	569.289	-0.312421	0.945973	28.0998	25.0736	941.538	850.336	0.20306	0.999975
C03F11.4	WBGene00015390	chrX	5401452	5406411	1.71324	1.52552	47.9843	27.9842	-0.364215	0.954286	1.71324	1.6777	47.5405	46.4317	0.0901215	0.999975
C03G5.1	WBGene00015391	chrX	8542813	8545974	169.969	158.173	7406.15	5362.99	-0.0519515	0.989836	169.969	147.935	7400.51	6650.54	0.210227	0.999975
C03G5.10	WBGene00044338	chrX	8537054	8537460	7.6456	11.6136	3.55735	1.29474	-1.0444	NA	7.6456	5.41399	3.58065	1.04345	1.83494	0.999975
C03G5.11	WBGene00044339	chrX	8537895	8538306	5.09361	10.3503	23.6092	24.4216	0.462541	NA	5.09361	3.81033	23.7045	16.1506	0.609643	NA
C03G5.12	WBGene00044340	chrX	8538686	8539037	3.35315	7.71474	0.204021	0.314792	1.03942	NA	3.35315	2.95905	NA	NA	NA	NA
C03G5.13	WBGene00044357	chrX	8541092	8541443	3.4303	7.71474	NA	NA	NA	NA	3.4303	2.99676	NA	NA	NA	NA
C03G5.2	WBGene00015392	chrX	8541811	8542231	5.56562	9.72868	1.20476	3.39662	1.90909	NA	5.56562	4.22845	1.1991	1.35224	-0.117315	0.999975
C03G5.7	WBGene00001448	chrX	8528196	8531023	110.488	219.535	853.889	1338.76	1.06251	0.526856	110.488	165.265	853.399	1347.46	-0.602879	0.999975
C03G5.8	WBGene00023477	chrX	8534616	8535053	6.20144	11.8302	1.62531	6.34779	2.37928	0.723905	6.20144	4.76096	1.67566	0.655791	1.4095	0.999975
C03G5.9	WBGene00044337	chrX	8535415	8535766	3.4303	7.71474	NA	NA	NA	NA	3.4303	2.99676	NA	NA	NA	NA
C03G6.10	WBGene00015396	chrV	7342169	7343818	0.67001	0.342326	13.2255	5.09419	-0.962664	0.945973	0.67001	0.811647	13.0654	17.0047	-0.324112	0.999975
C03G6.11	WBGene00005439	chrV	7350862	7352218	0.0218696	0	0.350759	0.190932	-0.463682	NA	0.0218696	0	0.350432	0.203769	0.838272	0.999975
C03G6.12	WBGene00015397	chrV	7348192	7350049	0.156162	0.149489	4.24932	2.42895	-0.393167	NA	0.156162	0.149272	4.2482	3.81485	0.211301	0.999975
C03G6.13	WBGene00015398	chrV	7354457	7356766	3.14137	63.7666	66.52	1242.33	4.63685	0.00165775	3.14137	6.11397	66.1168	139.289	-1.01891	0.999975
C03G6.14	WBGene00015399	chrV	7359978	7361755	0.46943	0.588546	6.57593	6.91499	0.486265	0.962306	0.46943	0.381893	6.47989	4.71888	0.5136	0.999975
C03G6.15	WBGene00015400	chrV	7362297	7364186	13.8893	26.6342	400.082	541.708	0.850952	0.851731	13.8893	13.3455	400.195	391.035	0.0894809	0.999975
C03G6.16	WBGene00015401	chrV	7377878	7379466	0.0184052	0.065782	0.350762	0.708176	1.42735	NA	0.0184052	0.13927	0.345528	2.07505	-2.5302	0.999975
C03G6.17	WBGene00015402	chrV	7379735	7381066	6.59549	11.9329	110.236	165.142	0.99685	0.917997	6.59549	7.46283	110.031	134.94	-0.238331	0.999975
C03G6.18	WBGene00005646	chrV	7382002	7383291	2.07904	2.27615	0.204022	0.796149	2.37805	NA	2.07904	2.02542	0.204043	1.28066	-2.59387	0.999975
C03G6.19	WBGene00005647	chrV	7384213	7386288	13.805	19.0643	332.326	352.647	0.49936	0.923422	13.805	12.5073	332.009	306.244	0.172613	0.999975
C03G6.2	WBGene00005947	chrV	7374371	7375576	0.634686	0.519163	12.0532	9.49414	0.0694304	0.990966	0.634686	0.994888	12.2492	21.1057	-0.728865	0.999975
C03G6.3	WBGene00005602	chrV	7369741	7372113	0.831126	1.26666	33.5395	34.0696	0.436359	0.947937	0.831126	0.760189	33.6035	30.8726	0.178358	0.999975
C03G6.5	WBGene00015393	chrV	7365224	7365906	30.6093	25.2607	244.529	155.418	-0.240113	0.9686	30.6093	23.6434	244.449	199.478	0.349376	0.999975
C03G6.6	WBGene00015394	chrV	7357419	7358864	0.429314	0.149313	6.88922	1.93918	-1.41516	0.945973	0.429314	0.272833	6.95412	4.58051	0.658436	0.999975
C03G6.7	WBGene00005480	chrV	7353021	7354236	0	0	0.204021	0.314792	1.03942	NA	0	0	NA	NA	NA	NA
C03G6.8	WBGene00015395	chrV	7346671	7348117	0.41373	0.604492	8.36839	8.67289	0.465298	0.952818	0.41373	0.487499	8.28806	10.4887	-0.283652	0.999975
C03G6.9	WBGene00005450	chrV	7344042	7345216	0.0362469	0	0.631513	0.190933	-1.31201	NA	0.0362469	0.0328997	0.614245	0.594298	0.103702	0.999975
C03H12.1	WBGene00007284	chrX	15689389	15696355	10.1892	9.01877	493.217	303.19	-0.288267	0.945973	10.1892	8.94085	492.716	432.928	0.242702	0.999975
C03H5.1	WBGene00015403	chrII	402659	404235	32.1239	28.6454	743.521	535.647	-0.0593576	0.990033	32.1239	18.931	743.888	452.628	0.772834	0.999975
C03H5.2	WBGene00015404	chrII	388832	392737	69.8965	46.8559	1574.23	751.47	-0.653129	0.508973	69.8965	65.9237	1574.62	1502.41	0.1238	0.999975
C03H5.3	WBGene00015405	chrII	386193	387920	15.6286	17.1295	278.875	211.767	0.0165951	0.993677	15.6286	17.6324	278.669	318.796	-0.138004	0.999975
C03H5.4	WBGene00015406	chrII	375249	375835	0	0.0737363	0.204022	0.491744	1.68292	NA	0	0.158459	0.204043	1.18288	-2.47928	0.999975
C03H5.5	WBGene00015407	chrII	382272	385354	6.83517	2.74407	221.112	64.7998	-1.35698	0.0300727	6.83517	5.22431	221.175	171.703	0.42135	0.999975
C03H5.6	WBGene00015408	chrII	392813	399976	7.35922	5.53402	218.437	134.176	-0.289351	0.957525	7.35922	8.09463	218.344	248.997	-0.133452	0.999975
C03H5.7	WBGene00015409	chrII	380572	382344	1.57633	0.960499	37.0421	15.4717	-0.845804	0.945973	1.57633	1.6403	37.0164	36.0956	0.0924136	0.999975
C04A11.1	WBGene00007285	chrX	13660448	13662893	6.71983	8.76168	136.829	137.63	0.422145	0.945973	6.71983	6.61472	136.575	136.493	0.05694	0.999975
C04A11.2	WBGene00007286	chrX	13665886	13668742	1.43587	1.01687	48.424	21.4295	-0.762389	0.945973	1.43587	1.6527	48.5143	53.9903	-0.0982166	0.999975
C04A11.3	WBGene00007287	chrX	13677121	13682008	12.2982	10.802	970.546	578.555	-0.332608	0.945973	12.2982	11.3829	971.031	905.488	0.156896	0.999975
C04A11.4	WBGene00000074	chrX	13687902	13695721	11.7561	11.499	790.608	528.794	-0.166522	0.952688	11.7561	10.9703	790.467	740.573	0.150138	0.999975
C04A11.5	WBGene00007288	chrX	13664516	13665310	3.43306	37.6303	14.074	107.285	3.34408	3.92e-09	3.43306	5.32047	13.9177	29.2958	-1.0177	0.999975
C04A2.1	WBGene00015410	chrII	6848016	6851484	7.48383	18.0591	175.673	276.226	1.06669	0.564113	7.48383	6.67546	175.015	169.444	0.102745	0.999975
C04A2.3	WBGene00001194	chrII	6835037	6847865	70.6812	63.954	6258.16	2968.09	-0.662468	NA	70.6812	62.3067	6271.94	5238.82	0.315744	NA
C04A2.7	WBGene00001023	chrII	6853420	6858255	71.2597	46.8255	5499.7	2136.36	-0.950467	NA	71.2597	70.2213	5514.78	5119.1	0.163487	NA
C04B4.1	WBGene00007289	chrX	12280638	12282491	0.0178965	0	0.520756	0.190933	-1.03381	NA	0.0178965	0	0.52246	0.20377	1.41445	0.999975
C04B4.2	WBGene00007290	chrX	12283232	12285246	8.47484	4.0224	414.988	96.1677	-1.69571	NA	8.47484	7.58197	416.751	338.218	0.357307	NA
C04B4.3	WBGene00007291	chrX	12285755	12287185	0	0	NA	NA	NA	NA	0	0	0.204042	0.343882	-0.696972	0.999975
C04B4.4	WBGene00007292	chrX	12289910	12293199	0.00539945	0.00829928	0.513029	0.728005	0.918642	NA	0.00539945	0.0272739	0.513477	0.790107	-0.565675	0.999975
C04B4.5	WBGene00007293	chrX	12287590	12288286	0	0	NA	NA	NA	NA	0	0	0.204042	0.331132	-0.642465	0.999975
C04B4.6	WBGene00007294	chrX	12274973	12275609	0	0.038964	0.204021	0.314792	1.03942	NA	0	0.0300452	0.204042	0.331132	-0.642465	0.999975
C04C11.1	WBGene00007295	chrX	14020716	14022340	2.38073	3.29726	36.6193	36.9743	0.427655	0.945973	2.38073	2.88328	36.3096	42.9196	-0.185209	0.999975
C04C11.2	WBGene00007296	chrX	14033724	14037384	42.3788	36.7808	1699.04	1083.16	-0.235738	0.945973	42.3788	39.2923	1699.63	1654.07	0.0952738	0.999975
C04C3.1	WBGene00015411	chrIV	3428896	3430330	0.0659262	0.100789	1.19961	1.43575	0.67297	NA	0.0659262	0.0546789	1.19602	1.19552	0.0566752	0.999975
C04C3.2	WBGene00015412	chrIV	3415679	3419231	0.426013	0.396207	12.2056	8.27738	-0.146562	0.983518	0.426013	0.385921	12.3974	11.3756	0.180169	0.999975
C04C3.3	WBGene00015413	chrIV	3399666	3403904	225.012	218.045	5330.25	3741.34	-0.0969163	0.976446	225.012	220.518	5331.84	5222.13	0.0860718	0.999975
C04C3.4	WBGene00015414	chrIV	3394362	3394642	3.90802	7.25981	0.350759	0.190932	-0.463682	NA	3.90802	4.27086	0.350434	0.343884	0.083295	0.999975
C04C3.5	WBGene00001119	chrIV	3396577	3399120	4.10745	3.63691	105.946	59.3575	-0.422091	0.949003	4.10745	3.03085	106.027	71.4369	0.625769	0.999975
C04C3.6	WBGene00015416	chrIV	3419809	3422604	0.217585	0.443862	3.53646	5.53548	1.06014	0.945973	0.217585	0.27101	3.56806	5.48739	-0.564905	0.999975
C04C3.7	WBGene00015417	chrIV	3432771	3433484	0.217068	0	1.68341	0.190934	-2.7265	NA	0.217068	0	1.68669	0.203771	3.10524	0.999975
C04C3.9	WBGene00195067	chrIV	3428084	3428531	0.222674	0.164619	0.968835	0.628987	-0.209487	NA	0.222674	0.574544	0.984355	1.78045	-0.798915	0.999975
C04D8.1	WBGene00015418	chrIII	8494940	8518803	37.3987	32.5493	4356.74	2534.14	-0.368018	0.945973	37.3987	38.5855	4361.79	4479.38	0.017695	0.999975
C04E12.10	WBGene00015439	chrV	3377532	3381921	0.021683	0.026017	0.932373	1.06982	0.612127	NA	0.021683	0.0433059	0.95515	2.20192	-1.14889	0.999975
C04E12.11	WBGene00015440	chrV	3386487	3388153	0.777343	0.715488	3.89847	5.69478	0.960465	0.945973	0.777343	1.20083	4.08828	9.2837	-1.12713	0.999975
C04E12.12	WBGene00015441	chrV	3389326	3390949	0.896825	1.3013	15.125	19.8488	0.805853	0.898891	0.896825	1.04717	15.188	20.0084	-0.341596	0.999975
C04E12.2	WBGene00015433	chrV	3368069	3369874	3.7939	11.6519	40.7909	87.0804	1.50784	0.0321524	3.7939	4.3807	40.8487	46.7065	-0.137257	0.999975
C04E12.4	WBGene00015434	chrV	3362780	3368318	9.25205	7.793	251.166	154.052	-0.291485	0.957633	9.25205	9.59831	251.024	275.22	-0.076684	0.999975
C04E12.5	WBGene00015435	chrV	3358595	3361090	0.489988	0.324715	7.09651	3.00712	-0.824994	0.954286	0.489988	0.688543	6.81277	14.1264	-0.996011	0.999975
C04E12.6	WBGene00015436	chrV	3354665	3355510	0.0576752	0	0.512288	0.314794	-0.288812	NA	0.0576752	0.0231903	0.513075	0.505573	0.0773254	0.999975
C04E12.7	WBGene00015437	chrV	3355976	3357190	0.621369	0.591047	9.27552	6.63622	-0.0693316	0.992301	0.621369	0.350789	9.61009	5.55133	0.847791	0.999975
C04E12.8	WBGene00006012	chrV	3370938	3372770	0	0.0478271	0.204022	0.519977	1.76346	NA	0	0.0304646	0.204043	0.760476	-1.84195	0.999975
C04E12.9	WBGene00015438	chrV	3374358	3377073	0	0	NA	NA	NA	NA	0	0.00905182	0.204043	0.45836	-1.11154	0.999975
C04E6.10	WBGene00005093	chrV	5904899	5906335	0.0681739	0.0628578	1.55006	1.06623	-0.126077	NA	0.0681739	0.0261695	1.55079	0.612102	1.39723	0.999975
C04E6.11	WBGene00015425	chrV	5914077	5917831	6.26663	3.85894	459.112	170.618	-1.01434	0.898891	6.26663	5.595	460.275	403.684	0.245344	0.999975
C04E6.13	WBGene00015427	chrV	5912739	5913740	36.4557	60.3975	103.483	136.197	0.810041	0.92862	36.4557	55.8252	103.32	162.992	-0.601611	0.999975
C04E6.2	WBGene00015419	chrV	5922527	5924280	0.330905	0.018031	5.7381	0.489515	-3.13741	NA	0.330905	0.227972	5.72868	5.81439	0.0346507	0.999975
C04E6.3	WBGene00015420	chrV	5920103	5920378	0	0	NA	NA	NA	NA	0	0	NA	NA	NA	NA
C04E6.4	WBGene00015421	chrV	5907390	5909603	0.0370409	0.106694	1.21054	2.30507	1.34289	NA	0.0370409	0.059279	1.23472	2.45264	-0.934082	0.999975
C04E6.5	WBGene00015422	chrV	5902115	5904829	0.0838987	0.150712	3.50656	3.5043	0.412807	NA	0.0838987	0.0993663	3.45988	3.73213	-0.0531997	0.999975
C04E6.6	WBGene00001698	chrV	5895370	5898585	0.473831	0.364836	19.4376	9.74111	-0.582957	0.947937	0.473831	0.451174	19.5045	17.264	0.232116	0.999975
C04E6.7	WBGene00015423	chrV	5893299	5895196	5.82057	9.15725	95.5265	96.401	0.426882	0.945973	5.82057	5.99159	95.4267	103.007	-0.0541988	0.999975
C04E6.8	WBGene00015424	chrV	5882647	5883820	5.70031	8.70977	37.327	44.2233	0.658322	0.945973	5.70031	6.88074	37.3023	39.854	-0.0393842	0.999975
C04E6.9	WBGene00005094	chrV	5898510	5900023	0.0295177	0.0158556	0.774461	0.314795	-0.885047	NA	0.0295177	0.0382605	0.774113	0.74461	0.112134	0.999975
C04E7.1	WBGene00015428	chrX	358091	360198	0.0634141	0.0165334	0.841598	0.314795	-1.00498	NA	0.0634141	0.117547	0.866756	1.5762	-0.806679	0.999975
C04E7.2	WBGene00015429	chrX	353619	357934	8.81944	8.51598	314.604	210.24	-0.167761	0.954286	8.81944	8.89981	314.352	319.269	0.0336828	0.999975
C04E7.3	WBGene00015430	chrX	344126	346289	4.36105	5.26219	125.772	105.659	0.16234	0.976137	4.36105	3.69361	126.002	111.087	0.237837	0.999975
C04E7.4	WBGene00015431	chrX	334309	341232	2.06093	2.9128	110.521	109.759	0.403745	0.945973	2.06093	2.10708	110.676	113.143	0.0242693	0.999975
C04E7.5	WBGene00045270	chrX	360778	362966	0.211395	0.0660878	1.9197	0.314797	-2.19466	NA	0.211395	0.0584348	1.90106	0.503509	1.97279	0.999975
C04F1.1	WBGene00015442	chrI	5726375	5729310	2.72031	0.743106	42.9286	8.65634	-1.89637	0.831217	2.72031	1.84596	42.8445	31.0226	0.521864	0.999975
C04F1.3	WBGene00002989	chrI	5716678	5725359	7.68256	8.77665	187.354	161.393	0.198545	0.955159	7.68256	8.48986	187.413	216.824	-0.154233	0.999975
C04F12.1	WBGene00007297	chrI	9673657	9678544	7.51276	7.70238	547.286	339.233	-0.276283	0.959966	7.51276	8.54225	548.859	594.802	-0.0599011	0.999975
C04F12.10	WBGene00001405	chrI	9711057	9712757	40.5944	35.9397	1165.56	732.88	-0.255642	0.945973	40.5944	40.7257	1165.19	1180.86	0.0367998	0.999975
C04F12.12	WBGene00077685	chrI	9694612	9695203	0.31971	1.03641	2.20671	4.72465	1.51204	NA	0.31971	0.422663	2.16706	3.26736	-0.536316	0.999975
C04F12.3	WBGene00002069	chrI	9685472	9688639	8.61444	12.4986	303.758	332.521	0.544261	0.945973	8.61444	8.9861	303.215	326.861	-0.0522591	0.999975
C04F12.4	WBGene00004426	chrI	9689175	9690118	3783.29	4599	19471.9	18388.9	0.331179	0.945973	3783.29	4714.65	19477.1	24790.4	-0.291928	0.999975
C04F12.5	WBGene00007299	chrI	9690088	9690548	36.7462	49.9894	190.188	163.736	0.197678	0.974337	36.7462	46.2041	190.771	235.4	-0.247202	0.999975
C04F12.6	WBGene00007300	chrI	9692650	9693772	0.100579	0.48408	0.349859	2.00938	2.93564	NA	0.100579	0.0714557	0.350435	0.588801	-0.692559	0.999975
C04F12.7	WBGene00007301	chrI	9695698	9696753	5.79524	10.3376	61.6481	50.026	0.112357	NA	5.79524	5.71301	61.7404	62.9587	0.0278847	NA
C04F12.8	WBGene00007302	chrI	9697584	9699546	15.4147	19.6264	212.749	195.513	0.291846	0.945973	15.4147	18.5456	212.784	257.855	-0.221099	0.999975
C04F12.9	WBGene00007303	chrI	9710078	9710758	7.18819	11.5106	51.2105	60.163	0.646173	0.945973	7.18819	11.5413	51.3934	84.5825	-0.662703	0.999975
C04F2.1	WBGene00005300	chrV	7497720	7499036	0.10144	0.0305325	1.7986	0.476847	-1.50154	NA	0.10144	0.0540777	1.77293	1.01693	0.857989	0.999975
C04F2.4	WBGene00005437	chrV	7501716	7504352	0.113624	0.0634659	4.58751	1.56846	-1.13463	NA	0.113624	0.140532	4.64295	5.68227	-0.235352	0.999975
C04F5.1	WBGene00004795	chrV	5119954	5126901	10.519	7.80848	686.266	288.113	-0.838396	NA	10.519	10.1707	688.448	636.177	0.169992	NA
C04F5.2	WBGene00015444	chrV	5093699	5096262	0.0917175	0.0391283	1.23565	0.757612	-0.291999	NA	0.0917175	0.0595695	1.2309	0.818208	0.645253	0.999975
C04F5.3	WBGene00006782	chrV	5094768	5098892	1.29465	1.3627	38.2911	31.7956	0.145552	0.978619	1.29465	1.49819	38.2058	46.3962	-0.224138	0.999975
C04F5.4	WBGene00015446	chrV	5100064	5102102	0.0366791	0	0.631512	0.190933	-1.31201	NA	0.0366791	0.0188797	0.626072	0.720092	-0.145778	0.999975
C04F5.5	WBGene00015447	chrV	5103026	5105019	0	0	NA	NA	NA	NA	0	0.0514047	0.204043	0.914612	-2.10821	0.999975
C04F5.6	WBGene00015448	chrV	5105748	5107901	0.0606839	0.0297515	1.48412	0.314795	-1.82339	NA	0.0606839	0.260668	1.53927	5.45671	-1.76971	0.999975
C04F5.7	WBGene00015449	chrV	5107999	5110774	2.81319	0.503359	97.247	11.1783	-2.70722	0.000140388	2.81319	1.69291	97.4603	59.0711	0.778437	0.999975
C04F5.8	WBGene00015450	chrV	5111481	5113741	21.4481	27.1921	438.807	380.211	0.206947	0.957633	21.4481	23.1079	439.286	475.823	-0.0591906	0.999975
C04F5.9	WBGene00015451	chrV	5114729	5119194	5.79899	5.98632	224.504	135.526	-0.314436	0.959966	5.79899	5.55997	225.136	204.874	0.192138	NA
C04F6.1	WBGene00006929	chrX	3403456	3408591	1386.79	583.181	145618	30708.1	-1.83176	NA	1386.79	1160.94	146288	116115	0.389326	NA
C04F6.2	WBGene00015452	chrX	3397137	3397454	14.1405	11.9979	22.8154	13.6709	-0.325168	0.957633	14.1405	13.3974	22.9302	22.9996	0.0517196	0.999975
C04F6.3	WBGene00000503	chrX	3397593	3400007	8.58234	20.6514	412.26	580.293	0.906962	0.945973	8.58234	9.40866	413.597	428.67	0.0044336	NA
C04F6.4	WBGene00006810	chrX	3408649	3411669	27.05	23.8784	1009	680.137	-0.155288	0.966283	27.05	25.8729	1008.92	993.942	0.0776533	0.999975
C04F6.5	WBGene00000990	chrX	3412869	3414693	16.5529	13.2035	290.457	181.09	-0.267882	0.954286	16.5529	14.0718	290.395	250.876	0.267119	0.999975
C04F6.7	WBGene00195081	chrX	3416874	3419200	0.258701	0.359059	7.22779	8.07446	0.573547	0.957525	0.258701	0.506398	7.21635	14.407	-0.94135	0.999975
C04G2.1	WBGene00007304	chrIV	10088345	10089868	7.23042	11.3896	70.7229	87.0732	0.713786	0.935617	7.23042	10.6724	70.5474	112.775	-0.620705	0.999975
C04G2.10	WBGene00007309	chrIV	10115368	10118062	0.773706	1.61026	18.5449	18.761	0.430452	NA	0.773706	0.988203	18.6138	22.9098	-0.243516	NA
C04G2.11	WBGene00007310	chrIV	10119437	10122367	0.0247936	0.0154048	0.758493	0.491747	-0.211484	NA	0.0247936	0.0209281	0.793809	0.84138	-0.0278913	0.999975
C04G2.2	WBGene00007305	chrIV	10090712	10092358	0.182444	0.665785	5.13629	10.1063	1.3902	0.945973	0.182444	0.447856	4.95366	10.498	-1.02747	0.999975
C04G2.4	WBGene00003432	chrIV	10095378	10095830	6.954	21.8973	24.3442	31.774	0.798002	NA	6.954	4.56147	24.2572	11.569	1.12423	NA
C04G2.5	WBGene00007306	chrIV	10094178	10095204	0.215881	0.694185	3.41331	5.43667	1.08529	0.972136	0.215881	0.174282	3.42847	2.4824	0.521903	0.999975
C04G2.6	WBGene00001001	chrIV	10097186	10106535	13.206	11.9511	863.601	517.498	-0.325078	0.945973	13.206	14.042	864.854	914.798	-0.0249224	0.999975
C04G2.7	WBGene00001204	chrIV	10107013	10110391	6.67693	10.7455	94.6671	110.982	0.643124	0.869206	6.67693	8.10365	94.8056	119.343	-0.275994	0.999975
C04G2.8	WBGene00007307	chrIV	10110325	10111556	3.0127	10.4133	43.1518	77.1115	1.25126	NA	3.0127	1.63086	43.1287	21.5217	1.05893	NA
C04G2.9	WBGene00007308	chrIV	10112868	10114209	3.04628	7.61627	97.0783	117.879	0.693818	NA	3.04628	2.18372	97.4944	63.3425	0.678219	NA
C04G6.1	WBGene00003402	chrII	5104108	5108892	7.76624	6.17896	236.913	144.457	-0.29998	0.95201	7.76624	6.0096	236.879	192.014	0.359008	0.999975
C04G6.10	WBGene00015458	chrII	5101975	5102638	3.06267	3.17175	16.2196	12.8321	0.0757517	0.990033	3.06267	1.73008	16.3539	8.70681	0.965497	0.999975
C04G6.11	WBGene00015459	chrII	5103331	5103825	0	0	NA	NA	NA	NA	0	0	NA	NA	NA	NA
C04G6.13	WBGene00077489	chrII	5094236	5095362	0.0330905	0	0.512287	0.190933	-1.01015	NA	0.0330905	0.0266105	0.513541	0.732971	-0.457202	0.999975
C04G6.2	WBGene00015453	chrII	5093227	5094206	5.24623	0.584489	49.5415	3.72098	-3.32115	0.021912	5.24623	3.13667	49.8023	28.6302	0.854751	0.999975
C04G6.3	WBGene00004040	chrII	5083839	5091628	24.9437	23.1017	2390.73	1536.19	-0.224361	0.952871	24.9437	24.9861	2389.45	2461.71	0.013096	0.999975
C04G6.4	WBGene00015454	chrII	5081486	5083433	18.9282	17.1583	538.838	339.085	-0.25447	0.945973	18.9282	16.9388	539.141	484.962	0.208864	0.999975
C04G6.5	WBGene00015455	chrII	5085776	5086113	18.0642	9.55265	30.7673	11.7672	-0.972888	0.945973	18.0642	14.1055	31.0466	24.4396	0.401292	0.999975
C04G6.6	WBGene00015456	chrII	5099428	5100233	0.557927	0.32552	7.61073	2.72277	-1.06922	0.945973	0.557927	0.384061	7.57039	4.75214	0.727866	0.999975
C04G6.7	WBGene00015457	chrII	5100402	5101774	2.05549	2.72369	12.4039	14.0648	0.595034	0.954286	2.05549	2.29527	12.3636	16.1526	-0.329592	0.999975
C04H4.1	WBGene00007311	chrII	7958792	7960186	1.83289	1.0199	2.76478	1.05111	-0.981509	NA	1.83289	2.46636	2.76302	3.63508	-0.339666	0.999975
C04H5.1	WBGene00007312	chrII	14534222	14535820	22.8162	20.384	443.929	259.473	-0.361011	0.945973	22.8162	24.5698	445.048	459.547	0.0098233	0.999975
C04H5.2	WBGene00007313	chrII	14535743	14537504	1.80116	1.54744	41.038	17.5383	-0.812718	NA	1.80116	2.80655	41.2046	58.5962	-0.451929	NA
C04H5.3	WBGene00007314	chrII	14540743	14548716	0.532827	0.495636	33.3957	23.0268	-0.122614	0.985519	0.532827	0.731881	33.4938	48.509	-0.478282	0.999975
C04H5.6	WBGene00003392	chrII	14552429	14561521	11.8538	11.3931	812.069	515.099	-0.243017	0.957214	11.8538	12.4844	813.395	855.312	-0.0164194	0.999975
C04H5.7	WBGene00007315	chrII	14537870	14539087	0.771003	1.81259	11.3806	14.216	0.734672	NA	0.771003	1.18475	11.4237	17.1629	-0.531189	NA
C04H5.8	WBGene00007316	chrII	14550837	14552410	68.5077	156.514	206.373	372.365	1.2652	0.636657	68.5077	88.9701	206.449	281.81	-0.392863	0.999975
C05A2.1	WBGene00004083	chrV	10702528	10704889	12.3429	13.2802	334.127	254.29	0.0198146	0.992301	12.3429	15.7401	333.773	424.845	-0.291996	0.999975
C05A9.1	WBGene00003999	chrX	10854254	10859228	1.15903	1.42322	79.6475	65.2118	0.125238	0.984051	1.15903	1.79184	79.6146	132.584	-0.679726	0.999975
C05A9.2	WBGene00007317	chrX	10842616	10844609	41.7049	42.1137	521.053	376.787	-0.0539487	0.987584	41.7049	51.4001	520.522	650.883	-0.266364	0.999975
C05B10.1	WBGene00003043	chrIV	6842952	6844955	15.9333	17.6697	399.095	289.294	-0.0504606	0.989836	15.9333	17.3554	399.895	443.165	-0.0921452	0.999975
C05B5.1	WBGene00007319	chrIII	9987651	9988371	0.0540822	0	0.35076	0.314793	0.257655	NA	0.0540822	0	0.350432	0.203769	0.838272	0.999975
C05B5.11	WBGene00045242	chrIII	10004375	10004875	0.157048	0	0.795373	0.190933	-1.64483	NA	0.157048	0	0.789339	0.203771	2.00977	0.999975
C05B5.12	WBGene00194886	chrIII	9987289	9987639	0.155605	0.194585	0.35076	0.314793	0.257655	NA	0.155605	0	0.350433	0.331133	0.137803	0.999975
C05B5.2	WBGene00007320	chrIII	9998452	10000427	0.999927	3.25981	31.7369	50.5913	1.08646	NA	0.999927	1.25247	31.9364	35.4713	-0.0953738	NA
C05B5.3	WBGene00004100	chrIII	9996121	9997831	3.20941	3.75637	73.4619	60.6767	0.13788	0.968669	3.20941	3.63172	73.2009	83.7422	-0.138019	0.999975
C05B5.4	WBGene00007321	chrIII	9993795	9996146	7.0716	7.57735	126.646	98.6101	0.052737	0.990009	7.0716	8.6106	126.548	160.537	-0.287145	0.999975
C05B5.5	WBGene00007322	chrIII	10001285	10003024	0.594302	0.166183	11.5336	2.64956	-1.70828	0.899716	0.594302	0.246472	11.4073	5.42097	1.12941	0.999975
C05B5.6	WBGene00007323	chrIII	10007882	10010087	0.101672	0.409505	2.93783	6.10761	1.46959	0.945973	0.101672	0.132804	2.96331	3.43229	-0.155887	0.999975
C05B5.7	WBGene00004344	chrIII	10014502	10016444	9.70504	13.678	124.095	136.183	0.547826	0.945973	9.70504	10.8466	124.001	154.655	-0.262627	0.999975
C05B5.8	WBGene00007324	chrIII	10005366	10006694	19.4502	38.3073	158.562	244.036	1.03579	0.883168	19.4502	27.103	158.37	233.886	-0.506428	0.999975
C05C10.1	WBGene00007328	chrII	9918065	9920509	0.084128	0.147303	1.92386	2.68211	0.893099	NA	0.084128	0.811941	1.94432	19.3069	-3.2557	0.211236
C05C10.2	WBGene00007329	chrII	9922188	9930771	7.28674	8.08041	819.74	565.145	-0.122812	0.984051	7.28674	7.92387	820.96	883.659	-0.0501018	0.999975
C05C10.3	WBGene00007330	chrII	9934344	9936836	179.232	224.786	5470.62	5243.67	0.352608	0.949003	179.232	179.183	5462.58	5756.49	-0.0195308	0.999975
C05C10.4	WBGene00007331	chrII	9931785	9934384	79.7711	87.8234	1909.2	1444.32	0.0111531	0.996331	79.7711	90.6663	1907.66	2233.38	-0.17135	0.999975
C05C10.5	WBGene00007332	chrII	9939094	9940278	25.1867	33.1369	629.797	276.334	-0.774738	NA	25.1867	30.3574	632.491	688.927	-0.0672319	NA
C05C10.6	WBGene00007333	chrII	9940701	9943988	26.3222	24.6205	1612.99	952.252	-0.346587	0.952736	26.3222	23.4694	1616.02	1451.94	0.210539	0.999975
C05C10.7	WBGene00007334	chrII	9938046	9938904	1.85936	3.92656	25.6791	30.4062	0.657505	0.952818	1.85936	2.3365	25.8362	29.7964	-0.149668	0.999975
C05C10.8	WBGene00086567	chrII	9917062	9917884	0	0.0480688	0.204021	0.314792	1.03942	NA	0	0	NA	NA	NA	NA
C05C12.1	WBGene00007335	chrIV	11253962	11255698	0.373981	0.447283	10.3875	5.43646	-0.520371	0.985519	0.373981	0.30759	10.4359	7.09158	0.613444	0.999975
C05C12.3	WBGene00001795	chrIV	11248879	11259443	6.22773	6.32733	638.922	467.156	-0.0380008	0.991085	6.22773	5.68349	638.662	612.948	0.115361	0.999975
C05C12.4	WBGene00007336	chrIV	11246425	11248030	22.011	17.9562	348.17	206.446	-0.340297	0.959966	22.011	25.1123	347.263	423.077	-0.228819	0.999975
C05C12.5	WBGene00007337	chrIV	11260308	11261148	0.622393	2.54372	6.02556	13.1881	1.5438	NA	0.622393	0.679513	5.90503	5.90339	0.0564738	0.999975
C05C12.6	WBGene00007338	chrIV	11231647	11233101	2.55322	2.19031	39.1076	21.5122	-0.448559	0.945973	2.55322	2.70124	39.0301	40.1158	0.0164915	0.999975
C05C8.1	WBGene00015460	chrV	7239750	7241348	14.094	15.9177	146.33	121.615	0.14683	0.957633	14.094	12.323	146.204	133.189	0.190586	0.999975
C05C8.2	WBGene00015461	chrV	7231162	7232731	20.3053	19.6771	423.965	286.537	-0.151487	0.960723	20.3053	20.2844	424.353	419.397	0.0730219	0.999975
C05C8.3	WBGene00001428	chrV	7225350	7226296	108	72.7664	1481.71	782.914	-0.506604	0.945973	108	80.5627	1480.99	1139.01	0.434857	0.999975
C05C8.4	WBGene00001563	chrV	7226356	7230830	17.8539	16.0713	1437.44	810.144	-0.413518	0.945973	17.8539	15.9345	1440.35	1248.07	0.262791	0.999975
C05C8.5	WBGene00015462	chrV	7232654	7234810	6.18593	6.45305	255.444	157.172	-0.286925	0.966112	6.18593	6.58962	256.213	263.679	0.0146349	NA
C05C8.6	WBGene00015463	chrV	7234905	7237112	14.1482	11.0001	617.102	274.512	-0.754902	NA	14.1482	12.8451	619.051	534.738	0.2673	NA
C05C8.7	WBGene00015464	chrV	7242888	7247279	76.1569	58.7914	3159.63	1661.19	-0.513806	0.823121	76.1569	58.5338	3162.16	2473.59	0.410379	0.999975
C05C8.8	WBGene00015465	chrV	7252306	7255139	0.225233	0	5.61585	0.314796	-3.74328	NA	0.225233	0.0924903	5.7245	2.45942	1.27491	0.999975
C05C8.9	WBGene00015466	chrV	7237374	7239644	10.7777	8.55983	148.271	88.1525	-0.336424	0.954286	10.7777	10.3052	148.298	148.554	0.0535841	0.999975
C05C9.1	WBGene00007325	chrX	11160914	11163620	4.94254	2.64513	132.302	53.7351	-0.886159	0.88706	4.94254	3.02763	132.477	86.0584	0.678429	0.999975
C05C9.2	WBGene00007326	chrX	11152998	11157577	0.931126	1.28997	10.8953	11.6181	0.506405	0.959376	0.931126	0.507665	10.9021	6.76433	0.744668	0.999975
C05C9.3	WBGene00007327	chrX	11142904	11152754	1.56299	0.787442	158.314	49.4846	-1.264	0.408486	1.56299	1.09995	158.173	109.188	0.590759	0.999975
C05D10.1	WBGene00015477	chrIII	6080511	6084686	47.4274	44.303	1553.09	1066.5	-0.128526	0.966112	47.4274	51.4388	1552.99	1800.94	-0.157628	0.999975
C05D10.2	WBGene00015478	chrIII	6067805	6072030	3.61618	4.97551	109.998	99.9622	0.275711	0.958598	3.61618	4.44466	109.688	123.688	-0.117226	0.999975
C05D10.3	WBGene00015479	chrIII	6084621	6087404	1.86465	1.73208	77.8551	49.5666	-0.23769	0.956137	1.86465	1.82354	77.9134	75.5076	0.101324	0.999975
C05D10.4	WBGene00015480	chrIII	6088633	6102810	18.7451	16.5326	693.008	447.866	-0.216069	0.947937	18.7451	18.6007	693.14	697.219	0.0476095	0.999975
C05D11.1	WBGene00015481	chrIII	6436555	6439906	42.3132	37.1311	2675.36	1653.81	-0.280201	0.945973	42.3132	42.7406	2675.66	2748.1	0.0175368	0.999975
C05D11.10	WBGene00015487	chrIII	6430984	6431740	56.8361	60.2754	485.493	373.342	0.0347802	0.985519	56.8361	66.9035	485.558	583.672	-0.209438	0.999975
C05D11.11	WBGene00003214	chrIII	6440092	6442948	224.515	151.933	7249.91	3430.28	-0.665903	0.24294	224.515	187.835	7254.86	6079.71	0.31102	0.999975
C05D11.12	WBGene00002855	chrIII	6444639	6446891	92.6238	135.328	3475.74	3744.07	0.521022	0.92246	92.6238	87.1873	3471.67	3401.71	0.0854449	0.999975
C05D11.13	WBGene00015488	chrIII	6442629	6443919	9.38751	12.0135	140.673	130.545	0.30594	0.945973	9.38751	11.5123	140.721	178.214	-0.284695	0.999975
C05D11.2	WBGene00006516	chrIII	6433184	6436448	11.4099	11.0947	638.719	426.468	-0.169007	0.953645	11.4099	10.3356	638.949	582.874	0.188591	0.999975
C05D11.3	WBGene00006515	chrIII	6432128	6433101	40.9209	31.6486	555.472	304.225	-0.45484	0.870506	40.9209	40.1187	555.468	538.285	0.101409	0.999975
C05D11.4	WBGene00002881	chrIII	6407075	6409981	51.5022	47.5702	1644.96	1119.45	-0.141535	0.970046	51.5022	60.5153	1643.9	1991.06	-0.220339	0.999975
C05D11.5	WBGene00015483	chrIII	6409699	6411506	10.6042	11.862	226.426	182.57	0.103142	0.967789	10.6042	17.3411	226.504	375.377	-0.672733	0.999975
C05D11.6	WBGene00003523	chrIII	6411526	6414940	7.85435	6.27437	188.809	103.704	-0.450726	0.945973	7.85435	7.11287	188.354	174.473	0.166517	0.999975
C05D11.7	WBGene00015484	chrIII	6415718	6421659	24.396	32.9298	1392.02	1254.93	0.264163	0.954286	24.396	26.092	1394.96	1471.19	-0.0206875	0.999975
C05D11.8	WBGene00015485	chrIII	6422405	6427252	6.37941	5.79299	389.281	225.956	-0.371036	0.954286	6.37941	5.62225	389.417	344.909	0.231176	0.999975
C05D11.9	WBGene00015486	chrIII	6427477	6430882	5.68968	5.35952	293.934	177.261	-0.315885	0.955159	5.68968	5.32072	294.057	270.897	0.174425	0.999975
C05D12.1	WBGene00007339	chrII	11411817	11415708	5.91334	4.93301	235.554	133.961	-0.400504	0.945973	5.91334	5.75053	235.702	244.54	0.00297051	0.999975
C05D12.2	WBGene00007340	chrII	11418249	11423317	1.34549	4.56606	87.0111	215.983	1.72538	0.00488695	1.34549	1.80231	86.9491	124.382	-0.460465	0.999975
C05D12.3	WBGene00014666	chrII	11424685	11430535	44.0329	14.233	2767.5	611.997	-1.76325	0.000137919	44.0329	58.9755	2769.14	3814.12	-0.405837	0.999975
C05D12.4	WBGene00007341	chrII	11429919	11432702	2.99891	1.10999	57.4932	16.6774	-1.37176	0.295534	2.99891	3.9505	57.788	78.9564	-0.394212	0.999975
C05D12.5	WBGene00007342	chrII	11434156	11434894	0.139882	0.151952	1.736	1.49014	0.193417	NA	0.139882	0.224743	1.70686	3.08207	-0.796481	0.999975
C05D12.7	WBGene00044029	chrII	11410049	11411911	51.5346	83.9014	251.297	307.735	0.706032	0.874746	51.5346	57.8503	251.369	296.339	-0.181368	0.999975
C05D2.1	WBGene00000900	chrIII	5624971	5632447	24.8441	28.4924	1566.94	1241.39	0.0777389	0.9772	24.8441	27.8803	1565.62	1790.67	-0.137694	0.999975
C05D2.10	WBGene00015470	chrIII	5597913	5600018	16.328	23.5034	516.969	506.607	0.384524	0.915525	16.328	19.1429	517.168	609.385	-0.180646	0.999975
C05D2.3	WBGene00015467	chrIII	5614929	5617230	0.0634307	0.322415	2.54253	6.64231	1.79916	0.95201	0.0634307	0.102389	2.50954	4.24179	-0.701173	0.999975
C05D2.4	WBGene00000239	chrIII	5612231	5614637	17.4485	15.7628	512.318	352.923	-0.123953	0.980453	17.4485	16.6373	512.564	505.75	0.0753826	0.999975
C05D2.5	WBGene00001514	chrIII	5604416	5607511	20.3157	13.4107	1291.49	430.533	-1.1711	NA	20.3157	21.43	1297.05	1253.31	0.105572	NA
C05D2.6	WBGene00015468	chrIII	5600339	5603722	10.424	9.71596	425.558	236.026	-0.436674	0.945973	10.424	10.0962	426.797	395.29	0.166713	0.999975
C05D2.8	WBGene00015469	chrIII	5607465	5610304	34.948	38.2641	874.038	700.393	0.0942036	0.9772	34.948	34.3514	874.447	863.57	0.0741326	0.999975
C05D9.1	WBGene00004927	chrX	1128980	1132922	26.843	29.4585	891.658	690.015	0.0438708	0.986401	26.843	26.5634	891.672	879.242	0.0763271	0.999975
C05D9.2	WBGene00015471	chrX	1125166	1128285	8.62548	7.38071	143.222	88.732	-0.276989	0.945973	8.62548	10.3025	143.327	177.536	-0.252722	0.999975
C05D9.3	WBGene00015472	chrX	1111899	1116791	40.2507	38.0305	1199.39	852.591	-0.0786423	0.980454	40.2507	44.6765	1199.45	1362.65	-0.12797	0.999975
C05D9.4	WBGene00015473	chrX	1108063	1108413	1.12026	0.392495	1.93972	0.860401	-0.759032	NA	1.12026	0.448155	1.94101	1.95897	0.0427853	0.999975
C05D9.5	WBGene00002062	chrX	1104208	1106244	11.4331	11.2651	152.967	115.006	0.002221	0.998755	11.4331	10.0586	152.896	138.573	0.197986	0.999975
C05D9.7	WBGene00015474	chrX	1117193	1119404	11.1719	14.8244	161.666	160.618	0.40436	0.945973	11.1719	15.214	161.34	226.985	-0.436415	0.999975
C05D9.9	WBGene00015476	chrX	1122417	1124231	22.572	33.5402	259.264	242.996	0.320243	0.954286	22.572	28.9473	259.504	324.601	-0.266837	0.999975
C05E11.1	WBGene00015492	chrX	4588738	4590420	15.6523	20.794	349.405	338.158	0.366533	0.945973	15.6523	15.8497	349.668	352.436	0.0447012	0.999975
C05E11.2	WBGene00015493	chrX	4586889	4587966	0	0	NA	NA	NA	NA	0	0	0.204042	0.331132	-0.642465	0.999975
C05E11.3	WBGene00015494	chrX	4579479	4581630	7.38644	8.05136	155.677	122.115	0.0634209	0.985519	7.38644	8.47623	155.656	186.442	-0.204291	0.999975
C05E11.4	WBGene00000133	chrX	4571421	4573888	0.207551	0.809662	6.76144	19.0749	1.91001	0.111719	0.207551	0.592306	6.72938	20.1227	-1.5242	0.999975
C05E11.5	WBGene00000136	chrX	4565275	4569534	17.0721	7.18292	660.989	225.524	-1.13761	0.576078	17.0721	15.0995	661.983	598.899	0.200554	0.999975
C05E11.6	WBGene00015495	chrX	4562168	4562811	2.2684	3.10443	12.1569	13.1632	0.528467	0.945973	2.2684	2.67151	12.2881	15.6564	-0.293411	0.999975
C05E11.7	WBGene00015496	chrX	4581570	4585638	2.16972	1.25356	69.7764	30.4017	-0.784852	0.813783	2.16972	1.33521	69.8475	43.9573	0.724181	0.999975
C05E11.8	WBGene00001455	chrX	4591253	4592477	93.9347	189.274	547.41	909.679	1.14647	0.842596	93.9347	105.859	547.549	640.497	-0.170129	0.999975
C05E4.1	WBGene00005643	chrV	762734	764658	1.97685	4.62228	48.3158	73.3567	1.01617	0.945973	1.97685	3.07906	48.3133	70.7853	-0.494955	0.999975
C05E4.10	WBGene00005613	chrV	734420	736272	0.0156806	0.0158175	0.35076	0.314793	0.257655	NA	0.0156806	0	0.350432	0.203769	0.838272	0.999975
C05E4.11	WBGene00005612	chrV	736803	738871	0	0	NA	NA	NA	NA	0	0.0082597	0.204042	0.331132	-0.642465	0.999975
C05E4.12	WBGene00015491	chrV	758039	761979	0.0175925	0.0585619	0.733503	0.924969	0.748338	NA	0.0175925	0.0344008	0.751772	1.41911	-0.860549	0.999975
C05E4.13	WBGene00006288	chrV	751326	752780	0.140364	0.101606	3.48347	1.25473	-1.05942	NA	0.140364	0.321971	3.54084	8.18913	-1.15354	0.999975
C05E4.14	WBGene00005228	chrV	728309	734280	2.68684	9.63678	35.2501	101.202	1.93527	0.338722	2.68684	2.22701	35.0849	30.7395	0.246829	0.999975
C05E4.2	WBGene00006087	chrV	756469	757893	0	0	NA	NA	NA	NA	0	0	NA	NA	NA	NA
C05E4.3	WBGene00005642	chrV	753334	755049	3.75585	7.52809	87.6187	114.864	0.804346	0.928591	3.75585	5.25885	87.4956	118.929	-0.386742	0.999975
C05E4.4	WBGene00005516	chrV	748344	750468	0.0456258	0.0111049	0.838718	0.314795	-1.00004	NA	0.0456258	0.0178662	0.839094	0.343255	1.34562	0.999975
C05E4.6	WBGene00006182	chrV	743648	745476	0.00854445	0	0.328122	0.190932	-0.367436	NA	0.00854445	0.0202543	0.328341	0.712585	-1.06179	0.999975
C05E4.7	WBGene00015489	chrV	742120	743274	0	0.777754	0.204022	2.56122	4.06377	NA	0	0.101264	0.204043	0.588799	-1.47283	0.999975
C05E4.9	WBGene00001564	chrV	724207	728104	1114.38	2968.27	63294.2	128085	1.4307	0.414526	1114.38	1351.96	63100	82385.1	-0.32867	0.999975
C05E7.1	WBGene00007343	chrX	12941370	12943477	9.37956	8.99073	157.056	111.964	-0.0745078	0.985519	9.37956	7.32464	156.966	124.744	0.387553	0.999975
C05E7.2	WBGene00007344	chrX	12938626	12940641	8.33503	11.856	118.891	141.245	0.662292	0.945973	8.33503	5.84957	119.018	86.1413	0.522474	0.999975
C05E7.3	WBGene00007345	chrX	12945545	12946492	8.17856	14.3401	45.3817	64.3596	0.91778	0.945973	8.17856	8.38249	45.2736	52.6327	-0.161213	0.999975
C05E7.4	WBGene00007346	chrX	12965414	12968386	0.532154	0.576991	6.6776	6.64135	0.405882	0.959966	0.532154	0.52075	6.6485	7.82068	-0.17819	0.999975
C05G5.1	WBGene00007347	chrX	14734376	14740019	11.0828	13.8766	346.008	325.842	0.327102	0.945973	11.0828	11.1809	345.64	361.647	-0.00923711	0.999975
C05G5.2	WBGene00007348	chrX	14747250	14750321	7.75631	7.91399	344.563	234.582	-0.140945	0.966112	7.75631	6.94488	345.04	304.943	0.234299	0.999975
C05G5.3	WBGene00007349	chrX	14750787	14751942	5.32325	6.37748	70.6715	62.529	0.237132	0.957525	5.32325	5.9683	70.7789	81.5195	-0.147752	0.999975
C05G5.4	WBGene00007350	chrX	14753954	14756390	192.421	205.605	4263.43	3522.94	0.1385	0.974337	192.421	193.035	4261.78	4406.39	0.00793387	0.999975
C05G5.5	WBGene00007351	chrX	14756005	14760894	0.374993	0.483874	8.96846	7.64976	0.184289	0.977621	0.374993	0.479955	8.94654	11.6451	-0.324251	0.999975
C05G5.7	WBGene00050939	chrX	14743600	14743711	19658.8	11197.1	1338.18	619.239	-0.697972	0.945973	19658.8	12393.5	1339.37	871.57	0.67594	0.999975
C05G6.1	WBGene00015497	chrIV	627536	633965	3.09552	2.44033	104.844	52.8491	-0.574556	0.945973	3.09552	2.71203	105.559	93.9236	0.224561	NA
C05H8.1	WBGene00000518	chrIII	5635436	5654514	7.89478	11.3911	276.638	303.343	0.546683	0.924718	7.89478	9.14901	276.534	332.953	-0.211784	0.999975
C06A1.1	WBGene00007352	chrII	10559957	10563349	137.398	127.481	8296.93	5045.58	-0.303822	0.9488	137.398	128.103	8308.05	7641.25	0.176775	0.999975
C06A1.2	WBGene00007353	chrII	10568844	10572056	19.6913	23.6126	351.78	327.846	0.312079	0.952818	19.6913	24.6898	351.699	462.551	-0.339194	0.999975
C06A1.3	WBGene00007354	chrII	10572203	10574011	0.207815	0.936733	4.81132	13.4337	1.89508	0.85482	0.207815	0.343473	4.56904	7.98289	-0.748946	0.999975
C06A1.5	WBGene00007355	chrII	10579306	10580552	74.3751	78.2853	1476.55	1021.09	-0.11839	0.976446	74.3751	81.677	1478.73	1496.84	0.0385116	0.999975
C06A1.6	WBGene00007356	chrII	10564114	10564618	0.129521	0.025581	0.445129	0.190933	-0.807424	NA	0.129521	0	0.445654	0.20377	1.18506	0.999975
C06A1.7	WBGene00044235	chrII	10564851	10565341	0.207617	0.0267252	0.68903	0.190933	-1.43776	NA	0.207617	0.113619	0.697789	0.882666	-0.283003	0.999975
C06A12.3	WBGene00007357	chrIV	17427679	17429566	10.6888	17.6808	120.683	142.127	0.649688	0.398602	10.6888	13.5355	120.739	183.817	-0.550301	0.999975
C06A12.4	WBGene00001550	chrIV	17432939	17440054	0.197505	0.308189	8.61666	9.4948	0.553744	0.945973	0.197505	0.325747	8.53341	14.4281	-0.701617	0.999975
C06A12.5	WBGene00007358	chrIV	17429718	17431931	0.129599	0.188836	4.82982	5.2567	0.535922	0.954286	0.129599	0.285468	4.8162	10.8212	-1.11182	0.999975
C06A12.8	WBGene00007359	chrIV	17437300	17438118	0.0464865	0	0.802304	0.190933	-1.65734	NA	0.0464865	0	0.765679	0.722673	0.13947	0.999975
C06A5.1	WBGene00015499	chrI	6012059	6021985	7.04426	5.74047	981.765	482.883	-0.609968	0.945973	7.04426	6.34669	983.216	881.075	0.214318	0.999975
C06A5.10	WBGene00015506	chrI	5982520	5982971	2.19772	1.27326	0.724857	0.314795	-0.78955	NA	2.19772	1.80988	0.715399	0.720924	0.0449766	0.999975
C06A5.11	WBGene00004803	chrI	5991072	5993213	3.44461	4.0085	102.752	78.6307	0.027731	0.992577	3.44461	3.09496	102.932	94.1209	0.185175	0.999975
C06A5.12	WBGene00044414	chrI	6004654	6007597	2.03456	4.3581	11.2845	15.5038	0.872018	0.945973	2.03456	4.58461	11.2925	26.1407	-1.15486	0.999975
C06A5.2	WBGene00015500	chrI	6006334	6007326	0.0720133	0.724495	0.902803	5.42952	3.00208	NA	0.0720133	0.254648	0.905838	3.47213	-1.88242	0.999975
C06A5.3	WBGene00015501	chrI	5986493	5990843	16.59	14.9176	910.077	520.991	-0.390995	0.945973	16.59	17.2653	910.934	946.91	0.000193299	0.999975
C06A5.4	WBGene00015502	chrI	5980792	5981590	0.908848	1.16021	12.3165	7.58778	-0.285111	0.974337	0.908848	1.08977	12.2741	11.4213	0.159972	0.999975
C06A5.5	WBGene00015503	chrI	5981817	5982454	1.99384	2.10493	NA	NA	NA	NA	1.99384	1.77651	NA	NA	NA	NA
C06A5.6	WBGene00015504	chrI	5978691	5985873	15.156	8.78444	958.864	288.089	-1.32108	NA	15.156	13.0005	962.88	770.025	0.378525	NA
C06A5.7	WBGene00006823	chrI	5992664	6001101	66.0104	56.2725	2544.07	1354.93	-0.49519	0.945973	66.0104	63.0417	2546.21	2458.32	0.106754	0.999975
C06A5.8	WBGene00015505	chrI	6008079	6009608	3.24556	4.81056	79.8666	52.9256	-0.179892	NA	3.24556	4.43713	80.2117	85.9448	-0.0435225	NA
C06A5.9	WBGene00004380	chrI	6009782	6011525	5.00549	7.18354	150.178	117.971	0.0654961	0.991343	5.00549	6.18965	150.813	174.185	-0.151786	NA
C06A6.2	WBGene00015507	chrIV	7846629	7854550	15.7338	10.866	673.49	324.738	-0.638645	0.787274	15.7338	15.6033	673.568	692.241	0.0166247	0.999975
C06A6.3	WBGene00015508	chrIV	7830549	7832428	16.0207	18.1067	329.499	236.113	-0.067065	0.985519	16.0207	14.824	329.63	281.011	0.286296	0.999975
C06A6.4	WBGene00015509	chrIV	7826315	7829289	50.151	56.397	1274.76	973.645	0.0249794	0.990966	50.151	52.9607	1275.48	1371.48	-0.0486224	0.999975
C06A6.5	WBGene00015510	chrIV	7832330	7834663	59.4279	42.2443	1415.39	766.684	-0.470757	0.928591	59.4279	59.7668	1414.34	1463.86	0.00642716	0.999975
C06A6.7	WBGene00015511	chrIV	7837360	7837973	0.419152	0.557299	3.74266	3.18248	0.179822	NA	0.419152	0.51605	3.53175	4.11268	-0.163621	0.999975
C06A8.1	WBGene00015512	chrII	7773827	7777780	132.238	117.244	6552.84	3972.36	-0.308387	0.945973	132.238	117.701	6557.5	5892.55	0.210329	0.999975
C06A8.2	WBGene00015513	chrII	7779289	7781202	9.04372	8.76693	303.035	177.666	-0.35658	NA	9.04372	9.24544	303.978	297.868	0.085365	NA
C06A8.3	WBGene00015514	chrII	7790507	7791517	1332.27	2248.63	19380.2	24059.1	0.72573	0.833161	1332.27	1662.32	19390.3	23878.7	-0.24431	0.999975
C06A8.4	WBGene00004823	chrII	7783764	7784595	7.38152	9.02296	117.858	78.9609	-0.1641	NA	7.38152	8.29622	118.367	126.912	-0.0444855	NA
C06A8.5	WBGene00015515	chrII	7781526	7783296	16.1308	15.4586	537.756	330.878	-0.286919	0.957633	16.1308	15.6805	539.263	511.713	0.131728	0.999975
C06A8.6	WBGene00015516	chrII	7772514	7773860	0.218336	1.08878	5.43919	15.4045	1.91562	NA	0.218336	0.282631	5.32269	6.5328	-0.239472	0.999975
C06A8.7	WBGene00005262	chrII	7763884	7765464	0.132717	0.0930776	1.65614	1.07966	-0.203518	NA	0.132717	0.159981	1.6187	3.03598	-0.851248	0.999975
C06A8.8	WBGene00015517	chrII	7765309	7771965	21.387	13.1358	187.133	108.096	-0.378019	0.945973	21.387	26.6763	186.919	232.288	-0.257425	0.999975
C06A8.9	WBGene00001615	chrII	7785021	7794267	4.15044	3.98494	237.045	171.347	-0.0545058	0.990246	4.15044	4.3753	236.618	270.755	-0.138352	0.999975
C06B3.1	WBGene00007360	chrV	13902780	13903872	0	0	NA	NA	NA	NA	0	0	NA	NA	NA	NA
C06B3.10	WBGene00006277	chrV	13918626	13920018	0	0	0.350759	0.190932	-0.463682	NA	0	0.00964657	0.350433	0.331133	0.137803	0.999975
C06B3.11	WBGene00005933	chrV	13921015	13922390	0	0	NA	NA	NA	NA	0	0	0.204042	0.331132	-0.642465	0.999975
C06B3.12	WBGene00044114	chrV	13924136	13925793	0	0	NA	NA	NA	NA	0	0.0110134	0.204042	0.331132	-0.642465	0.999975
C06B3.13	WBGene00044115	chrV	13926683	13929306	0.0142907	0.0115805	0.35076	0.314793	0.257655	NA	0.0142907	0.00698605	0.350434	0.458362	-0.331267	0.999975
C06B3.14	WBGene00044116	chrV	13929788	13931238	0	0	0.204021	0.314792	1.03942	NA	0	0.0137253	0.204043	0.502404	-1.2439	0.999975
C06B3.16	WBGene00189947	chrV	13931510	13932184	0	0.138022	0.204022	0.618636	2.0141	NA	0	0.0832662	0.204043	0.542429	-1.35449	0.999975
C06B3.2	WBGene00007361	chrV	13899498	13902639	0.331451	0.114565	12.8616	2.87081	-1.74981	0.833726	0.331451	0.13581	12.948	5.40169	1.31733	0.999975
C06B3.3	WBGene00007362	chrV	13896642	13898474	8.44522	6.154	236.145	124.404	-0.510899	0.945973	8.44522	7.45927	235.989	214.786	0.191895	0.999975
C06B3.4	WBGene00007363	chrV	13906475	13908023	20.4373	22.4204	337.271	279.977	0.145133	0.974337	20.4373	22.3175	336.607	389.549	-0.154664	0.999975
C06B3.5	WBGene00007364	chrV	13904596	13905982	0.094472	0.116729	1.65332	1.47135	0.245506	NA	0.094472	0.172616	1.6412	3.41806	-1.00235	0.999975
C06B3.6	WBGene00007365	chrV	13908113	13909499	87.9179	190.374	972.193	1621.26	1.15153	0.404137	87.9179	108.968	971.407	1274.47	-0.335679	0.999975
C06B3.7	WBGene00007366	chrV	13909733	13911510	6.2266	8.68667	98.8332	101.631	0.454013	0.958598	6.2266	3.82245	98.6802	66.2173	0.631627	0.999975
C06B3.8	WBGene00001552	chrV	13912065	13915422	1.79329	1.70746	70.458	50.2255	-0.0746082	0.990009	1.79329	2.13968	70.4787	90.6123	-0.306445	0.999975
C06B3.9	WBGene00006278	chrV	13916481	13918037	0.0204366	0.0699442	0.520765	0.895456	1.19573	NA	0.0204366	0.0479576	0.522351	0.939504	-0.790805	0.999975
C06B8.1	WBGene00007367	chrV	15479525	15481659	1.26837	1.14916	23.2035	16.1935	-0.105191	0.989836	1.26837	1.32085	23.2492	25.8692	-0.0979798	0.999975
C06B8.10	WBGene00005428	chrV	15493961	15495743	0.195768	0.0856469	3.1538	1.04562	-1.179	NA	0.195768	0.134017	3.15088	3.05159	0.102265	0.999975
C06B8.11	WBGene00007373	chrV	15486369	15487100	0	0	NA	NA	NA	NA	0	0.0251787	0.204043	0.542429	-1.35449	0.999975
C06B8.2	WBGene00007368	chrV	15476045	15478548	3.74272	2.99429	84.429	50.7936	-0.319359	0.945973	3.74272	2.18241	84.7176	51.7656	0.766743	0.999975
C06B8.3	WBGene00007369	chrV	15484035	15484619	0.023481	0	0.445129	0.190933	-0.807424	NA	0.023481	0.0556608	0.445655	0.458362	0.0155153	0.999975
C06B8.4	WBGene00007370	chrV	15491049	15492752	0.49653	0.42841	8.19183	5.57062	-0.142614	0.990033	0.49653	0.546565	8.21345	10.0556	-0.235871	0.999975
C06B8.6	WBGene00005429	chrV	15496250	15497549	0	0	NA	NA	NA	NA	0	0.00886955	0.204043	0.45836	-1.11154	0.999975
C06B8.7	WBGene00007372	chrV	15498724	15511403	2.14129	2.26882	449.979	320.754	-0.0746535	0.981634	2.14129	1.43316	450.32	306.01	0.613444	0.999975
C06B8.8	WBGene00004452	chrV	15512147	15512755	7272.9	9206.86	13128.8	12897.6	0.388106	0.945973	7272.9	7751.2	13128.8	14228.9	-0.0600083	0.999975
C06B8.9	WBGene00005768	chrV	15488045	15489383	0	0.0120695	0.204021	0.314792	1.03942	NA	0	0.0117436	0.204042	0.343882	-0.696972	0.999975
C06C3.1	WBGene00003196	chrII	9358471	9369040	36.8177	24.0189	3109.01	1200.74	-0.958796	NA	36.8177	31.6027	3117.72	2540.4	0.351508	NA
C06C3.10	WBGene00044169	chrII	9375799	9377150	2.13691	4.51075	16.1156	23.0566	0.930455	0.898891	2.13691	2.30049	16.1467	17.1903	-0.0342838	0.999975
C06C3.12	WBGene00175031	chrII	9375047	9375789	2.82206	2.21322	28.6266	15.9078	-0.433887	0.945973	2.82206	2.14239	28.6854	17.4483	0.773309	0.999975
C06C3.3	WBGene00007374	chrII	9369118	9372312	0.529402	0.486391	17.9941	11.8748	-0.185882	0.973322	0.529402	0.322112	18.0522	10.8262	0.793721	0.999975
C06C3.4	WBGene00007375	chrII	9373231	9374795	1.41542	2.4576	19.8427	25.1592	0.756216	0.945973	1.41542	1.57494	19.9095	22.366	-0.111776	0.999975
C06C3.6	WBGene00005271	chrII	9383318	9384936	0.222173	0.180038	6.25022	3.00556	-0.642539	0.957633	0.222173	0.319081	6.18805	7.42129	-0.206109	0.999975
C06C3.7	WBGene00007377	chrII	9385479	9386478	0.366422	0.487731	1.52916	1.315	0.196053	NA	0.366422	0.646633	1.56728	1.9474	-0.257218	0.999975
C06C3.8	WBGene00007378	chrII	9386524	9390841	0.214256	0.550546	7.10855	12.5571	1.23462	0.838762	0.214256	0.221047	7.19863	6.80616	0.136955	0.999975
C06C3.9	WBGene00014668	chrII	9376395	9378223	1.24343	1.65692	5.76594	4.97535	0.200976	0.983518	1.24343	1.11839	5.78638	6.14331	-0.0302818	0.999975
C06C6.1	WBGene00007379	chrV	16010689	16012092	0	0	NA	NA	NA	NA	0	0.0174463	0.204043	0.45836	-1.11154	0.999975
C06C6.2	WBGene00006264	chrV	16008311	16009644	0	0	NA	NA	NA	NA	0	0	NA	NA	NA	NA
C06C6.3	WBGene00006262	chrV	16006283	16007585	0	0.0447736	0.204022	0.53123	1.79435	NA	0	0.086727	0.204044	1.56354	-2.88179	0.999975
C06C6.4	WBGene00003653	chrV	16002574	16004708	4.03205	6.0134	79.8843	85.7687	0.516273	0.945973	4.03205	4.24386	80.2933	88.0443	-0.0768744	0.999975
C06C6.5	WBGene00003640	chrV	15997758	16000633	8.52619	14.5148	132.023	151.8	0.615115	0.898891	8.52619	9.41141	132.112	130.351	0.0754285	0.999975
C06C6.6	WBGene00007380	chrV	15988733	15991587	0.0070487	0.057294	0.350765	1.80367	2.7761	NA	0.0070487	0.0172289	0.350436	0.849666	-1.22167	0.999975
C06C6.7	WBGene00007381	chrV	15992185	15995587	0.0362804	0.179196	2.66323	6.84167	1.77491	0.945973	0.0362804	0.035198	2.7108	2.45559	0.19872	0.999975
C06C6.8	WBGene00007382	chrV	15997115	15997750	0.676688	4.6796	3.13909	17.3467	2.87998	0.0892683	0.676688	0.580266	3.14067	2.90881	0.166717	0.999975
C06C6.9	WBGene00007383	chrV	15996193	15996725	0	0.624567	0.329093	1.60426	2.69908	NA	0	0.0840885	0.328339	0.343883	-0.010657	0.999975
C06E1.1	WBGene00015518	chrIII	8605751	8606424	9.90969	8.88128	91.9991	59.2	-0.222289	0.962645	9.90969	8.82918	92.1869	82.8697	0.209792	0.999975
C06E1.10	WBGene00015525	chrIII	8609796	8614489	6.36356	5.94693	487.595	312.819	-0.226621	0.952509	6.36356	6.43471	488.144	502.6	0.0139703	0.999975
C06E1.11	WBGene00015526	chrIII	8614681	8616244	0.334425	0.294879	9.20382	5.64371	-0.291854	0.975718	0.334425	0.395395	9.08056	9.76312	-0.048486	0.999975
C06E1.3	WBGene00015519	chrIII	8581021	8583849	8.22894	5.61576	327.08	151.143	-0.699992	0.898891	8.22894	5.69221	327.555	221.577	0.620001	0.999975
C06E1.4	WBGene00001612	chrIII	8584105	8588535	1.14882	1.11563	64.1874	46.1955	-0.0608038	0.990246	1.14882	1.19757	64.0828	70.3256	-0.0780375	0.999975
C06E1.5	WBGene00015520	chrIII	8589216	8589462	1.03182	1.10581	1.20846	1.27044	0.485891	NA	1.03182	0.142116	1.22985	0.332088	1.94492	0.999975
C06E1.6	WBGene00015521	chrIII	8590752	8590902	0.69462	7.59424	0.97541	2.26476	1.62901	NA	0.69462	19.0114	1.04258	6.19938	-2.51589	0.999975
C06E1.7	WBGene00015522	chrIII	8591158	8593012	0.821557	0.244518	19.1181	3.62141	-1.98658	0.42173	0.821557	0.547256	19.1219	13.7419	0.532719	0.999975
C06E1.8	WBGene00015523	chrIII	8595287	8597790	4.80811	5.05572	132.139	97.4664	-0.0253414	0.993677	4.80811	4.98488	131.97	137.779	-0.0060698	0.999975
C06E1.9	WBGene00015524	chrIII	8606427	8609703	7.65695	9.52746	313.951	265.814	0.173608	0.959966	7.65695	7.89	313.613	324.438	0.0071168	0.999975
C06E2.1	WBGene00015527	chrX	8872880	8874581	5.85051	4.59584	101.73	59.7018	-0.355159	0.945973	5.85051	5.73809	101.524	102.353	0.0443331	0.999975
C06E2.2	WBGene00015528	chrX	8879595	8880353	0.163194	0.293406	0.350761	0.484036	0.878358	NA	0.163194	0	0.350432	0.203769	0.838272	0.999975
C06E2.3	WBGene00006716	chrX	8869571	8871782	0.812395	1.45763	8.42689	10.4791	0.728183	0.945973	0.812395	1.47532	8.6432	16.269	-0.856412	0.999975
C06E2.5	WBGene00015529	chrX	8856997	8857901	5.92954	6.7808	60.7827	44.7178	-0.0290767	0.993677	5.92954	5.88223	61.3479	63.6229	0.00354133	0.999975
C06E2.7	WBGene00006717	chrX	8867557	8869203	1.38414	2.43286	20.8502	25.9531	0.729579	0.945973	1.38414	1.96614	20.9105	31.2247	-0.522385	0.999975
C06E2.8	WBGene00002092	chrX	8866184	8866587	1.10226	0.549023	5.18637	1.3006	-1.58181	NA	1.10226	0.507931	5.16998	1.89492	1.50409	0.999975
C06E2.9	WBGene00044579	chrX	8861204	8861597	0	0.237493	0.204022	0.491744	1.68292	NA	0	0	NA	NA	NA	NA
C06E4.1	WBGene00015530	chrIV	7283245	7283860	0	0	NA	NA	NA	NA	0	0.0220918	0.204042	0.331132	-0.642465	0.999975
C06E4.2	WBGene00015531	chrIV	7276871	7283075	30.6666	21.0179	110.154	60.22	-0.457476	0.945973	30.6666	37.4933	109.978	132.125	-0.208613	0.999975
C06E4.3	WBGene00015532	chrIV	7260873	7262017	0.546921	0.786933	9.15793	8.91203	0.374467	0.959966	0.546921	0.668157	9.18402	10.9579	-0.198704	0.999975
C06E4.4	WBGene00015533	chrIV	7258641	7259526	0	0	NA	NA	NA	NA	0	0	NA	NA	NA	NA
C06E4.5	WBGene00015534	chrIV	7254978	7256253	0	0	NA	NA	NA	NA	0	0.0309167	0.204043	0.588799	-1.47283	0.999975
C06E4.6	WBGene00015535	chrIV	7257205	7258237	0.152152	0.140222	2.10575	1.52774	-0.0491946	NA	0.152152	0.190455	2.08464	3.00928	-0.473542	0.999975
C06E4.7	WBGene00015536	chrIV	7262225	7263225	2.19617	3.26826	23.1829	26.5359	0.608622	0.945973	2.19617	2.45724	23.1229	26.5484	-0.143233	0.999975
C06E4.8	WBGene00015537	chrIV	7284207	7285509	0.28248	0.573189	4.14911	5.5759	0.840139	0.954286	0.28248	0.652022	4.17639	9.5876	-1.14284	0.999975
C06E7.1	WBGene00015538	chrIV	5848643	5850838	109.053	69.3687	2479.22	652.484	-1.51213	NA	109.053	83.2262	2486.72	1587.58	0.703493	NA
C06E7.2	WBGene00015539	chrIV	5839387	5843992	9.54303	9.43409	285.395	210.957	-0.0222807	0.993113	9.54303	10.653	284.991	332.034	-0.164342	0.999975
C06E7.3	WBGene00015540	chrIV	5843970	5846387	68.3926	61.3407	1446.75	767.865	-0.500159	0.945973	68.3926	60.1791	1450.33	1184.93	0.34765	NA
C06E7.4	WBGene00015541	chrIV	5850827	5859965	41.0098	40.2765	1172.42	846.216	-0.0566598	0.987491	41.0098	36.1411	1172.32	1055.57	0.207413	0.999975
C06E7.6	WBGene00004973	chrIV	5864517	5865891	0.138098	0	0.802304	0.190933	-1.65734	NA	0.138098	0	0.804701	0.203771	2.03758	0.999975
C06E7.7	WBGene00005728	chrIV	5867677	5870161	0.0292705	0	0.520757	0.190933	-1.03381	NA	0.0292705	0	0.52246	0.20377	1.41445	0.999975
C06E7.88	WBGene00189995	chrIV	5865846	5867361	3.66922	1.65721	41.0366	12.1113	-1.34683	0.945973	3.66922	1.89513	41.1114	21.9811	0.959349	0.999975
C06E8.3	WBGene00004182	chrIII	6990115	7002255	30.4889	45.4599	990.303	1105.89	0.573003	0.814069	30.4889	34.4487	989.707	1158.75	-0.171423	0.999975
C06E8.5	WBGene00015544	chrIII	7002244	7005307	3.7157	4.32972	139.487	115.912	0.146624	0.973197	3.7157	3.61605	139.295	136.702	0.0831891	0.999975
C06G1.1	WBGene00015545	chrX	16633289	16637560	28.4656	28.2739	975.021	728.599	-0.00657396	0.997611	28.4656	20.8495	974.854	740.722	0.452329	0.999975
C06G1.2	WBGene00015546	chrX	16621737	16622666	10.3027	8.77731	149.776	88.6095	-0.343541	0.945973	10.3027	9.15597	149.96	134.392	0.214203	0.999975
C06G1.4	WBGene00015547	chrX	16613375	16617594	68.5699	61.7085	4635.91	2926.13	-0.250127	0.945973	68.5699	71.7677	4635.53	4968.3	-0.0439447	0.999975
C06G1.5	WBGene00015548	chrX	16638171	16642988	12.4489	11.8261	589.792	412.528	-0.101979	0.968669	12.4489	12.0961	589.865	585.261	0.0673784	0.999975
C06G1.6	WBGene00077591	chrX	16652031	16654410	13.9069	9.34307	659.929	308.227	-0.684582	0.810621	13.9069	11.2566	661.097	537.592	0.354425	0.999975
C06G3.1	WBGene00003695	chrIV	7050090	7053424	29.1751	44.5645	701.816	831.689	0.658687	0.945973	29.1751	33.6722	701.662	834.704	-0.194414	0.999975
C06G3.10	WBGene00000585	chrIV	7034390	7039569	7.94541	6.66859	435.221	247.638	-0.399778	0.945973	7.94541	6.84304	435.504	382.219	0.244362	0.999975
C06G3.11	WBGene00006572	chrIV	7043923	7044593	178.108	162.101	378.641	269.676	-0.0758683	0.983518	178.108	174.706	379.362	395.746	-0.00492656	0.999975
C06G3.2	WBGene00002228	chrIV	7040197	7043683	13.7863	12.7132	940.702	459.994	-0.618388	NA	13.7863	12.7015	944.2	862.185	0.187171	NA
C06G3.3	WBGene00015549	chrIV	7036111	7036458	8.30966	33.3486	17.3555	48.198	1.88732	0.634129	8.30966	27.2649	17.1941	59.1898	-1.72736	0.999975
C06G3.4	WBGene00015550	chrIV	7028446	7030992	0.0145951	0	0.631513	0.190933	-1.31201	NA	0.0145951	0.00894885	0.614575	0.50598	0.336583	0.999975
C06G3.5	WBGene00015551	chrIV	7024199	7028135	69.9981	113.765	1690.96	2026.06	0.674568	0.736206	69.9981	73.9112	1690.7	1835.45	-0.0624394	0.999975
C06G3.6	WBGene00015552	chrIV	7017614	7020191	11.2992	16.1707	385.201	401.173	0.472347	0.945973	11.2992	13.2405	384.801	475.086	-0.248	0.999975
C06G3.7	WBGene00015553	chrIV	7011991	7016569	31.7775	40.3617	1594.54	1468.56	0.294997	0.945973	31.7775	33.0386	1593.67	1731.28	-0.0634129	0.999975
C06G3.8	WBGene00015554	chrIV	7031279	7032548	13.215	13.1255	172.284	116.372	-0.152304	0.970555	13.215	13.117	172.589	170.424	0.0742805	0.999975
C06G3.9	WBGene00015555	chrIV	7032687	7036850	18.1996	16.0821	653.078	416.528	-0.235105	0.945973	18.1996	16.3644	653.293	598.303	0.182929	0.999975
C06G4.1	WBGene00015557	chrIII	7987063	7990484	3.88531	4.3107	307.581	174.018	-0.407994	NA	3.88531	3.96508	308.577	295.05	0.120746	NA
C06G4.2	WBGene00000542	chrIII	7981001	7986272	143.241	168.525	7568.2	6186.31	0.122863	0.967345	143.241	171.399	7568.92	8966.71	-0.188416	0.999975
C06G4.4	WBGene00015558	chrIII	7977150	7979695	0.291886	0.828723	2.13822	3.70992	1.20871	NA	0.291886	0.488499	2.04316	3.22277	-0.601421	0.999975
C06G4.5	WBGene00015559	chrIII	7990723	7996383	1.57764	1.08172	40.3109	22.0228	-0.458439	0.949699	1.57764	2.12088	40.2884	59.219	-0.499622	0.999975
C06G4.6	WBGene00044446	chrIII	8004331	8005770	0.235006	0.61831	2.93217	5.38343	1.29029	0.945973	0.235006	0.324379	2.84885	3.73282	-0.333811	0.999975
C06G8.1	WBGene00007384	chrIV	10778965	10780691	10.6107	25.3941	295.594	587.673	1.40513	NA	10.6107	13.9067	296.236	391.67	-0.346819	0.999975
C06G8.2	WBGene00003876	chrIV	10790577	10794544	6.42907	6.99522	353.823	253.6	-0.0667393	0.985519	6.42907	7.78357	354.323	435.779	-0.24246	0.999975
C06G8.3	WBGene00014669	chrIV	10799633	10802229	13.9588	20.9927	298.667	331.494	0.564179	0.726199	13.9588	23.9983	298.559	530.885	-0.774311	0.999975
C06G8.4	WBGene00005085	chrIV	10785069	10786811	0.125013	0.107752	2.6583	1.19531	-0.739386	NA	0.125013	0.0105307	2.64645	0.331448	3.05328	0.999975
C06H2.1	WBGene00007385	chrV	11122742	11123851	933.914	1215.15	12898.1	12625.6	0.382928	0.945973	933.914	1010.99	12890.6	14018.9	-0.0649743	0.999975
C06H2.2	WBGene00007386	chrV	11125203	11127286	10.6461	10.2681	301.206	210.198	-0.105264	0.959966	10.6461	9.83969	301.192	287.099	0.125211	0.999975
C06H2.3	WBGene00007387	chrV	11127476	11130067	3.56424	3.14302	128.566	74.8951	-0.365833	0.945973	3.56424	4.07221	128.293	148.537	-0.155314	0.999975
C06H2.4	WBGene00007388	chrV	11141479	11143045	3.98255	3.16132	99.4825	52.5786	-0.506232	0.945973	3.98255	4.25796	99.2414	107.486	-0.0590643	0.999975
C06H2.5	WBGene00007389	chrV	11134590	11140305	4.66451	5.42392	53.6228	54.5385	0.438162	0.949699	4.66451	4.50224	53.6061	66.1003	-0.246185	0.999975
C06H2.6	WBGene00007390	chrV	11124277	11125040	126.005	109.709	1400.24	763.117	-0.461962	NA	126.005	135.245	1403.86	1435.43	0.0239947	NA
C06H2.7	WBGene00007391	chrV	11143040	11144732	2.82333	3.93131	84.6012	61.42	-0.048235	NA	2.82333	2.54958	85.0746	70.4216	0.328784	NA
C06H5.1	WBGene00007392	chrV	17895280	17896778	4.86967	8.31343	41.3451	32.6369	0.072525	0.992466	4.86967	4.32233	41.3423	39.8317	0.109775	0.999975
C06H5.2	WBGene00007393	chrV	17899801	17901887	4.0322	7.5172	18.7905	19.5003	0.46723	0.959966	4.0322	3.55166	19.1845	18.2029	0.13185	0.999975
C06H5.6	WBGene00007394	chrV	17879817	17888958	7.66079	8.83717	262.838	215.978	0.130444	0.959966	7.66079	6.04019	263.023	209.366	0.385238	0.999975
C06H5.7	WBGene00007395	chrV	17910290	17917218	19.8182	44.7412	469.571	818.787	1.21588	0.246493	19.8182	23.7531	469.084	587.834	-0.269489	0.999975
C06H5.8	WBGene00044795	chrV	17919010	17921727	2.18214	2.55974	39.0875	36.2129	0.303532	0.958598	2.18214	1.67946	39.139	32.6832	0.316133	0.999975
C07A12.1	WBGene00001821	chrX	4554664	4558829	7.01384	14.0371	143.435	213.623	0.988405	0.360494	7.01384	8.04764	143.519	175.408	-0.233397	0.999975
C07A12.2	WBGene00015560	chrX	4544847	4545390	49.2759	64.3598	65.7775	92.6861	0.908493	0.74321	49.2759	57.0308	65.7569	81.9155	-0.260919	0.999975
C07A12.3	WBGene00003628	chrX	4532662	4537506	13.3588	22.1008	515.884	560.075	0.532308	0.898891	13.3588	14.0754	516.318	532.319	0.0120427	0.999975
C07A12.4	WBGene00003963	chrX	4524158	4526508	1902.3	1319.57	56544.1	30878.3	-0.459047	0.943944	1902.3	1552.46	56569.6	47073.8	0.321177	0.999975
C07A12.5	WBGene00005008	chrX	4514070	4516866	3.84464	3.41859	214.933	120.027	-0.426794	0.945973	3.84464	3.16459	215.648	172.242	0.380322	0.999975
C07A12.7	WBGene00015561	chrX	4517714	4521041	35.9586	51.7773	938.706	1023.61	0.538651	0.870705	35.9586	38.962	940.273	1018.62	-0.0593865	0.999975
C07A4.1	WBGene00007396	chrX	10167036	10171823	4.8501	5.65639	182.278	148.054	0.113715	0.976137	4.8501	5.2962	183.08	207.697	-0.125933	0.999975
C07A4.2	WBGene00007397	chrX	10172266	10174098	2.2028	4.19342	52.0665	77.4082	0.985866	0.842596	2.2028	2.07514	51.9012	53.3906	0.015256	0.999975
C07A4.3	WBGene00007398	chrX	10174925	10175868	0.244669	0.358657	4.45852	3.29178	-0.0239604	NA	0.244669	0.111926	4.46814	1.5593	1.57485	0.999975
C07A9.1	WBGene00007399	chrIII	9723197	9725130	0	0.064662	0.204023	0.970735	2.66408	NA	0	0.0328649	0.204043	0.630931	-1.57254	0.999975
C07A9.10	WBGene00007406	chrIII	9685085	9686642	0.023229	0	1.04816	0.190934	-2.04298	NA	0.023229	0.0141355	1.01313	0.466999	1.1734	0.999975
C07A9.11	WBGene00003572	chrIII	9715798	9720207	8.68398	3.09507	351.786	98.7375	-1.4193	0.282123	8.68398	4.69759	351.059	202.822	0.847574	0.999975
C07A9.12	WBGene00043994	chrIII	9725200	9727455	4.30804	4.7636	66.6247	53.3992	0.0944962	0.985519	4.30804	5.11765	66.5476	82.8073	-0.259296	0.999975
C07A9.13	WBGene00044227	chrIII	9679613	9681185	0.0494927	0.276184	0.695269	2.76763	2.40674	NA	0.0494927	0.0774553	0.690339	1.24843	-0.798663	0.999975
C07A9.2	WBGene00007400	chrIII	9694583	9696433	37.0144	39.83	322.9	241.849	-0.00324948	0.998161	37.0144	44.8242	323.356	391.942	-0.221442	0.999975
C07A9.3	WBGene00006579	chrIII	9699796	9710212	81.4916	50.4408	7648.4	2673.28	-1.10282	0.838851	81.4916	79.2698	7667.11	7224.93	0.141774	NA
C07A9.4	WBGene00003571	chrIII	9710164	9713844	1.14112	0.795824	38.565	17.9724	-0.687769	0.945973	1.14112	0.870482	38.2042	31.1036	0.352726	0.999975
C07A9.5	WBGene00007401	chrIII	9681439	9682745	0.0807353	0.185877	0.902748	1.19615	0.819744	NA	0.0807353	0.018951	0.905832	0.343106	1.45666	0.999975
C07A9.6	WBGene00007402	chrIII	9676244	9678956	9.44814	5.31388	292.538	122.307	-0.844382	0.458408	9.44814	7.58233	292.352	240.625	0.336992	0.999975
C07A9.7	WBGene00007403	chrIII	9690953	9694488	10.6305	9.24316	375.125	192.802	-0.546516	0.945973	10.6305	10.7985	376.178	364.363	0.102112	NA
C07A9.8	WBGene00007404	chrIII	9686848	9690169	2.54027	1.7749	67.8794	35.0777	-0.538685	0.95201	2.54027	3.54217	67.9459	100.742	-0.512134	0.999975
C07A9.9	WBGene00007405	chrIII	9663207	9667445	19.6829	44.5653	304.921	483.065	1.07752	0.834912	19.6829	23.029	304.724	380.338	-0.263704	0.999975
C07B5.2	WBGene00007407	chrX	9516449	9517130	0	0.33264	0.204023	1.1983	2.96792	NA	0	0.299012	0.204043	2.0398	-3.26541	0.999975
C07B5.3	WBGene00007408	chrX	9522432	9523170	6.70022	10.7673	41.5065	50.2397	0.689226	0.945973	6.70022	11.6369	41.5228	77.1167	-0.837065	0.999975
C07B5.4	WBGene00007409	chrX	9529475	9536577	8.39152	12.4355	292.757	324.306	0.561385	0.738694	8.39152	10.6563	292.313	385.276	-0.342304	0.999975
C07B5.5	WBGene00003828	chrX	9539847	9542373	55.829	131.445	1318.17	2376.56	1.26408	0.116046	55.829	58.285	1317.79	1422.57	-0.054308	0.999975
C07B5.6	WBGene00007410	chrX	9518964	9521429	0.322255	0.320529	3.70782	2.09131	-0.412434	NA	0.322255	0.564354	3.63138	5.87593	-0.638223	0.999975
C07B5.8	WBGene00195209	chrX	9536603	9536918	2.09754	2.11383	51.8126	17.1766	-1.17913	0.859741	2.09754	3.98133	51.8682	52.9111	0.0273567	0.999975
C07C7.1	WBGene00007411	chrIV	9185048	9186008	1.15541	1.4755	12.212	9.97396	0.121668	0.989474	1.15541	1.40064	12.2476	17.2816	-0.440665	0.999975
C07D10.1	WBGene00015566	chrII	7398966	7400504	1.38962	1.20356	27.1355	17.8539	-0.190205	0.974731	1.38962	1.21809	27.0793	25.3735	0.149943	0.999975
C07D10.2	WBGene00015567	chrII	7394721	7397308	32.1945	33.4535	1266.77	858.383	-0.147728	0.967024	32.1945	32.91	1268.93	1304.19	0.0165333	0.999975
C07D10.3	WBGene00015568	chrII	7387118	7389099	0.203379	0.29615	3.9268	3.98469	0.434851	NA	0.203379	0.275323	3.89431	5.38749	-0.412171	0.999975
C07D10.4	WBGene00003526	chrII	7400500	7402664	8.76136	8.35656	211.074	143.922	-0.138732	0.974337	8.76136	7.04859	211.002	173.188	0.340992	0.999975
C07D10.5	WBGene00015569	chrII	7381394	7383447	6.59554	6.05103	199.692	107.925	-0.474012	0.949003	6.59554	6.07503	199.889	180.105	0.206435	0.999975
C07D10.6	WBGene00044673	chrII	7379133	7379569	0.0918637	0	0.631512	0.190933	-1.31201	NA	0.0918637	0	0.628206	0.331214	0.979551	0.999975
C07D8.5	WBGene00015564	chrX	7344000	7344505	0.164714	0.203275	0.773326	0.728613	0.32781	NA	0.164714	0.219929	0.816969	0.99893	-0.234028	0.999975
C07D8.6	WBGene00015565	chrX	7341462	7342737	166.333	135.797	3359.65	1976.85	-0.351373	0.923422	166.333	177.823	3359.99	3595.82	-0.0417877	0.999975
C07E3.1	WBGene00007412	chrII	10346920	10349947	8.10242	7.96415	434.833	275.685	-0.243708	0.958598	8.10242	7.77362	435.681	400.984	0.1758	0.999975
C07E3.10	WBGene00007420	chrII	10346336	10346948	17.8146	8.08732	99.9831	31.2365	-1.26472	0.686217	17.8146	12.1306	100.725	70.6082	0.56859	0.999975
C07E3.2	WBGene00007413	chrII	10339631	10345056	25.062	21.2437	1158.22	659.621	-0.398473	0.945973	25.062	26.4965	1159.78	1204.69	0.00126312	0.999975
C07E3.3	WBGene00007414	chrII	10353572	10357460	17.1147	28.6611	405.085	488.222	0.683047	0.303579	17.1147	19.928	404.988	500.097	-0.248253	0.999975
C07E3.4	WBGene00007415	chrII	10360810	10362937	0.412782	0.623849	3.4985	4.12107	0.650017	NA	0.412782	0.562781	3.50534	2.76274	0.399532	0.999975
C07E3.5	WBGene00007416	chrII	10363523	10365649	1.7006	2.37242	36.5527	37.3436	0.444617	0.952509	1.7006	2.22559	36.4994	50.5197	-0.412897	0.999975
C07E3.6	WBGene00007417	chrII	10367667	10369537	8.34374	10.6515	179.076	158.087	0.233885	0.954286	8.34374	7.63858	178.608	164.742	0.172661	0.999975
C07E3.8	WBGene00007418	chrII	10352044	10353403	0.181746	0.226436	3.29155	2.86837	0.215196	NA	0.181746	0.109495	3.30937	2.49848	0.461584	0.999975
C07E3.9	WBGene00007419	chrII	10350699	10351557	4.87429	8.45214	39.9744	51.2966	0.773522	0.813783	4.87429	4.62174	39.9842	41.0779	0.0171393	0.999975
C07F11.1	WBGene00006593	chrI	444001	461610	15.3583	16.6547	1345.31	982.411	-0.0398037	0.989745	15.3583	16.5054	1347.03	1450.32	-0.0505182	0.999975
C07F11.2	WBGene00015570	chrI	420924	423721	1.54243	1.74021	43.1657	35.8655	0.146449	0.977519	1.54243	1.78469	43.2037	50.5876	-0.171553	0.999975
C07G1.1	WBGene00006620	chrIV	8210569	8213709	1.38786	1.70395	22.2143	25.3512	0.604299	0.945973	1.38786	1.66139	22.2789	27.6941	-0.257825	0.999975
C07G1.2	WBGene00015571	chrIV	8206599	8210921	1.06926	1.0921	38.7302	27.5738	-0.0764292	0.987591	1.06926	1.2654	38.6904	44.9978	-0.161804	0.999975
C07G1.3	WBGene00003961	chrIV	8176470	8188866	25.2291	22.2115	1178.25	652.893	-0.437991	0.945973	25.2291	27.5108	1180.07	1277.45	-0.058316	0.999975
C07G1.4	WBGene00006957	chrIV	8188887	8198937	36.5479	26.1148	1924.47	856.978	-0.753398	0.916936	36.5479	33.2997	1928.7	1670.84	0.263129	0.999975
C07G1.5	WBGene00004101	chrIV	8201364	8206034	51.8363	33.1974	3089.89	1154.15	-1.00699	0.83345	51.8363	40.9912	3096.68	2368.22	0.442998	NA
C07G1.6	WBGene00015572	chrIV	8209142	8210381	1.04067	1.41509	17.454	11.6881	-0.164785	NA	1.04067	0.863568	17.5771	13.2256	0.466444	NA
C07G1.7	WBGene00015573	chrIV	8210891	8211814	0.113589	1.16391	1.09319	8.76205	3.41646	0.825756	0.113589	0.039686	1.09412	0.537289	1.08208	0.999975
C07G1.8	WBGene00044608	chrIV	8200587	8201221	27.3579	24.948	168.462	114.622	-0.141798	0.966112	27.3579	23.6672	168.662	149.352	0.231492	0.999975
C07G2.1	WBGene00000465	chrIII	4489325	4491366	223.439	172.676	10880.2	3674.76	-1.15225	NA	223.439	255.094	10929	10702	0.0863543	NA
C07G2.2	WBGene00000223	chrIII	4491595	4499450	175.076	130.435	7756.2	3502.28	-0.73332	0.703703	175.076	178.821	7765.14	8038.59	0.00614487	0.999975
C07G2.3	WBGene00000380	chrIII	4499159	4508084	370.555	284.97	12581.7	6650.89	-0.505971	0.904943	370.555	361.645	12595.1	12129.1	0.110457	0.999975
C07G3.10	WBGene00015578	chrV	3502303	3503074	3.68175	8.39542	43.2294	75.4966	1.21813	0.870506	3.68175	6.24962	42.9836	73.7727	-0.723227	0.999975
C07G3.2	WBGene00015574	chrV	3523578	3524572	4.21146	4.67635	43.8654	39.5208	0.263264	0.966112	4.21146	1.94746	43.7194	20.3925	1.15631	0.999975
C07G3.3	WBGene00006258	chrV	3518185	3519798	0.0769274	0.0982752	1.59714	1.14025	-0.0724056	NA	0.0769274	0.111761	1.54754	2.43792	-0.5996	0.999975
C07G3.4	WBGene00006257	chrV	3512677	3514340	0	0	NA	NA	NA	NA	0	0.019223	0.204043	0.588799	-1.47283	0.999975
C07G3.5	WBGene00006259	chrV	3510174	3512035	0	0.0588272	0.204022	0.618636	2.0141	NA	0	0	NA	NA	NA	NA
C07G3.6	WBGene00006256	chrV	3507818	3509248	0.00796455	0.0776252	0.328125	0.935218	1.92479	NA	0.00796455	0.0407045	0.328626	0.733621	-1.10251	0.999975
C07G3.8	WBGene00015576	chrV	3493633	3500939	0.232549	0.760326	6.84183	14.1098	1.45798	0.611213	0.232549	0.268814	6.83117	7.32021	-0.043678	0.999975
C07G3.9	WBGene00015577	chrV	3503126	3506349	11.9428	11.446	429.621	262.118	-0.299111	0.957525	11.9428	9.96124	430.536	348.025	0.363017	0.999975
C07H4.1	WBGene00007421	chrII	9091046	9093634	5.6692	4.84254	58.0629	36.436	-0.258518	0.9772	5.6692	6.63128	57.9992	71.6715	-0.249292	0.999975
C07H4.2	WBGene00000532	chrII	9094617	9098784	19.2758	15.7384	1198.03	634.709	-0.502763	0.945973	19.2758	18.7731	1199.18	1176.42	0.08371	0.999975
C07H6.1	WBGene00002986	chrIII	7521396	7524770	5.49883	5.06212	261.257	166.898	-0.232771	0.947937	5.49883	5.60989	261.288	272.825	-0.00625897	0.999975
C07H6.2	WBGene00015579	chrIII	7520937	7521398	38.814	44.3169	227.464	181.541	0.0883966	0.978935	38.814	44.0247	227.826	259.893	-0.133907	0.999975
C07H6.3	WBGene00015580	chrIII	7508109	7515214	12.5909	11.1305	1122.21	695.822	-0.275817	0.945973	12.5909	11.4031	1122.89	1024.11	0.188922	0.999975
C07H6.4	WBGene00015581	chrIII	7499642	7503180	17.3874	17.2803	1112.85	710.896	-0.232811	0.958598	17.3874	17.9011	1114.22	1133.66	0.0311199	0.999975
C07H6.5	WBGene00000479	chrIII	7495201	7497768	1007.68	209.727	63175.8	6709.9	-2.82128	NA	1007.68	769.385	63457	45122.7	0.548	NA
C07H6.6	WBGene00000537	chrIII	7515156	7518458	5.3261	5.50797	360.771	214.678	-0.335171	0.962306	5.3261	5.76521	361.817	373.295	0.011016	NA
C07H6.7	WBGene00003024	chrIII	7528602	7536567	31.3178	20.4811	730.607	321.437	-0.770826	0.523443	31.3178	31.1513	730.778	723.968	0.069581	0.999975
C07H6.8	WBGene00000854	chrIII	7518560	7520739	12.9792	12.7578	424.365	277.041	-0.201469	0.959081	12.9792	13.7619	424.739	453.838	-0.0395289	0.999975
C07H6.9	WBGene00015582	chrIII	7498264	7499525	0.511466	0.224216	5.8019	1.66188	-1.38997	NA	0.511466	0.486625	5.79395	6.02803	-0.00106381	0.999975
C08A9.1	WBGene00004932	chrX	17092643	17094149	15.2709	14.8118	201.482	173.596	0.198817	0.983518	15.2709	16.8406	201.384	228.63	-0.126991	0.999975
C08A9.10	WBGene00044773	chrX	17081028	17081970	1.09372	3.5017	11.8532	19.0552	1.09865	NA	1.09372	1.83834	11.8327	18.2664	-0.570336	0.999975
C08A9.3	WBGene00015583	chrX	17087807	17093225	0.0228242	0.0278165	0.967306	1.05384	0.537348	NA	0.0228242	0.0348382	1.01252	1.70395	-0.694864	0.999975
C08A9.6	WBGene00015586	chrX	17094208	17096463	2.96141	3.19355	66.439	49.2681	-0.0176404	0.995473	2.96141	2.56386	66.6469	58.5579	0.242748	0.999975
C08A9.7	WBGene00015587	chrX	17099037	17100678	0.0456045	0.474512	1.25791	7.55052	2.99929	0.787274	0.0456045	0.374818	1.2739	10.3108	-2.96076	0.999975
C08A9.8	WBGene00015588	chrX	17102770	17104797	0.494271	0.533011	7.68028	6.56759	0.18794	0.983518	0.494271	0.390984	7.51908	6.20114	0.334097	0.999975
C08A9.9	WBGene00015589	chrX	17106531	17108296	0.0714213	0.363766	1.97111	4.43042	1.58217	NA	0.0714213	0.207837	1.99167	5.1229	-1.30691	0.999975
C08B11.1	WBGene00006996	chrII	8017628	8020734	29.1578	30.429	2038.25	1215.67	-0.331841	NA	29.1578	31.3841	2044.65	2046.28	0.0549232	NA
C08B11.2	WBGene00001835	chrII	8020727	8022510	5.94332	6.25174	189.856	135.603	-0.071788	0.98904	5.94332	6.13068	189.845	200.821	-0.0250098	0.999975
C08B11.3	WBGene00007433	chrII	8022261	8027707	33.4372	24.3268	3775.65	1623.84	-0.80358	NA	33.4372	31.5998	3784.5	3462.48	0.184371	NA
C08B11.4	WBGene00003813	chrII	8028902	8032659	11.0277	6.96408	609.18	243.98	-0.906371	0.945973	11.0277	9.45526	609.373	520.554	0.283353	0.999975
C08B11.5	WBGene00004723	chrII	8034292	8035717	87.9094	67.1029	2232.05	1087.9	-0.623095	0.945973	87.9094	81.2649	2238.01	1936.41	0.264906	0.999975
C08B11.6	WBGene00007434	chrII	8035817	8037296	6.06437	8.30783	153.824	134.871	0.224037	0.966112	6.06437	6.54211	153.513	161.418	-0.0163602	0.999975
C08B11.7	WBGene00006724	chrII	8038218	8039545	33.0403	26.3408	663.705	379.864	-0.391327	0.861994	33.0403	32.0693	664.51	648.509	0.0912396	0.999975
C08B11.8	WBGene00007435	chrII	8039953	8041685	12.4777	6.86031	435.29	135.856	-1.26617	0.908217	12.4777	13.9248	436.474	467.27	-0.0422882	NA
C08B11.9	WBGene00007436	chrII	8037387	8038115	21.0279	21.0339	224.618	162.198	-0.0559795	0.984051	21.0279	20.1761	224.794	216.911	0.10757	0.999975
C08B6.1	WBGene00007422	chrV	10102565	10104921	15.9871	12.2912	491.446	277.248	-0.41212	0.945973	15.9871	11.8889	490.837	381.418	0.419946	0.999975
C08B6.10	WBGene00007430	chrV	10125026	10127512	12.7915	23.4045	233.841	340.105	0.954188	0.645763	12.7915	12.7255	234.529	243.401	0.00250443	0.999975
C08B6.11	WBGene00007431	chrV	10107763	10109873	2.45014	0.902469	76.2955	19.1652	-1.57938	0.709389	2.45014	1.73163	75.5992	53.7844	0.547258	0.999975
C08B6.12	WBGene00007432	chrV	10119548	10120961	0	0	NA	NA	NA	NA	0	0	NA	NA	NA	NA
C08B6.13	WBGene00044012	chrV	10121108	10122745	0	0	NA	NA	NA	NA	0	0.0233683	0.204042	0.343882	-0.696972	0.999975
C08B6.14	WBGene00044044	chrV	10100130	10101991	0	0	NA	NA	NA	NA	0	0.0144958	0.204043	0.588799	-1.47283	0.999975
C08B6.2	WBGene00007423	chrV	10105686	10106666	0.446463	0.118574	4.59757	0.999989	-1.78715	NA	0.446463	0.102789	4.55384	1.42986	1.72728	0.999975
C08B6.3	WBGene00007424	chrV	10109372	10113440	2.76186	2.34174	69.6448	42.3899	-0.302562	0.945973	2.76186	1.87993	69.6884	49.0466	0.562841	0.999975
C08B6.4	WBGene00007425	chrV	10114739	10117311	3.59577	4.21606	109.436	93.4291	0.185596	0.953645	3.59577	2.5379	109.57	79.283	0.522844	0.999975
C08B6.5	WBGene00007426	chrV	10117739	10119663	0.0874517	0.0211654	2.0505	0.818774	-0.910708	NA	0.0874517	0.0402966	2.04395	1.13074	0.910165	0.999975
C08B6.6	WBGene00007427	chrV	10123612	10124729	0	0	NA	NA	NA	NA	0	0.0153092	0.204042	0.331132	-0.642465	0.999975
C08B6.7	WBGene00007428	chrV	10130378	10134125	31.3487	25.6294	1999.91	997.356	-0.59002	NA	31.3487	32.4308	2004.37	1996.76	0.0615607	NA
C08B6.8	WBGene00007429	chrV	10134635	10143065	16.4087	16.7024	219.101	147.248	-0.15961	0.961962	16.4087	18.2277	219.163	239.264	-0.0705246	0.999975
C08B6.9	WBGene00000142	chrV	10127468	10130272	15.2943	16.6203	334.475	248.343	-0.0158308	0.993677	15.2943	13.998	334.504	324.276	0.100878	0.999975
C08C3.1	WBGene00001174	chrIII	7814316	7817062	9.75503	12.4185	160.302	113.188	-0.0883408	0.977621	9.75503	10.9538	160.247	214.936	-0.367533	0.999975
C08C3.2	WBGene00015590	chrIII	7774623	7775962	2.64272	2.73733	62.7457	38.5527	-0.288952	0.974337	2.64272	2.71483	62.8695	63.8838	0.0329839	0.999975
C08C3.3	WBGene00003102	chrIII	7776841	7783389	14.1488	14.1667	242.586	181.013	-0.00866688	0.996419	14.1488	17.606	242.368	312.235	-0.309359	0.999975
C08C3.4	WBGene00015591	chrIII	7793377	7795344	44.664	34.2508	1106.14	407.457	-1.02709	NA	44.664	45.4848	1110.89	1012.11	0.190433	NA
C08D8.1	WBGene00015592	chrV	8345738	8349889	0.217562	0.154276	5.70517	3.15446	-0.441142	0.960868	0.217562	0.224345	5.78531	5.74134	0.0670798	0.999975
C08D8.2	WBGene00006582	chrV	8336637	8340655	11.7062	12.313	493.928	358.941	-0.046819	0.989836	11.7062	9.82113	493.438	420.6	0.286497	0.999975
C08E3.1	WBGene00015593	chrII	1633811	1634095	1539.55	4733.9	9.92244	12.1994	0.711774	0.951901	1539.55	2288.12	9.87801	11.1993	-0.125042	0.999975
C08E3.10	WBGene00015602	chrII	1619803	1621268	0.881111	2.40581	18.0418	38.1948	1.49577	0.555864	0.881111	0.986268	17.8117	20.8135	-0.168622	0.999975
C08E3.11	WBGene00015603	chrII	1621648	1622854	0.055083	0.0835023	0.44513	0.314794	-0.0860845	NA	0.055083	0	0.445654	0.20377	1.18506	0.999975
C08E3.12	WBGene00015604	chrII	1623913	1624679	0	0	NA	NA	NA	NA	0	0.0305592	0.204043	0.45836	-1.11154	0.999975
C08E3.13	WBGene00015605	chrII	1632000	1633856	1282.23	3611.86	180.294	186.5	0.462558	0.957633	1282.23	1832.09	180.543	153.192	0.293075	0.999975
C08E3.14	WBGene00044415	chrII	1625972	1626890	0	0	NA	NA	NA	NA	0	0	NA	NA	NA	NA
C08E3.15	WBGene00044416	chrII	1627485	1627890	0.223487	0.439085	NA	NA	NA	NA	0.223487	0	NA	NA	NA	NA
C08E3.2	WBGene00015594	chrII	1611337	1612517	0	0	NA	NA	NA	NA	0	0.031469	0.204043	0.45836	-1.11154	0.999975
C08E3.3	WBGene00015595	chrII	1604672	1606150	0	0	0.350759	0.190932	-0.463682	NA	0	0.0706771	0.349039	1.26809	-1.80512	0.999975
C08E3.4	WBGene00015596	chrII	1606596	1607613	0.0902528	0.225192	1.60001	2.61733	1.12376	NA	0.0902528	0.110498	1.62586	1.88387	-0.15642	0.999975
C08E3.5	WBGene00015597	chrII	1607881	1609008	0.527517	1.52703	9.827	19.0142	1.36599	0.858924	0.527517	0.70956	9.8414	13.9397	-0.446184	0.999975
C08E3.6	WBGene00015598	chrII	1609261	1610722	0.149341	0.34929	3.38659	5.66269	1.15539	0.951901	0.149341	0.420264	3.53334	9.56715	-1.38098	0.999975
C08E3.7	WBGene00015599	chrII	1612794	1614066	0.0621658	0.237165	1.33786	3.64932	1.86143	NA	0.0621658	0.141668	1.35755	3.01245	-1.09386	0.999975
C08E3.8	WBGene00015600	chrII	1614799	1616470	0.24609	0.455684	6.57073	9.65562	0.969048	0.953771	0.24609	0.288122	6.65271	7.407	-0.0988731	0.999975
C08E3.9	WBGene00015601	chrII	1616918	1619011	2.04454	2.2788	42.4202	36.1587	0.183326	0.966061	2.04454	1.46741	42.2046	31.6058	0.473287	0.999975
C08E8.1	WBGene00007437	chrV	18361006	18362515	1.15115	0.594009	4.77543	1.71544	-1.06332	NA	1.15115	0.794331	4.84596	2.99399	0.750788	0.999975
C08E8.10	WBGene00077692	chrV	18339091	18339879	11.6263	22.8597	38.6751	61.4846	1.08256	0.6082	11.6263	13.2771	38.8933	41.0196	-0.0207154	0.999975
C08E8.11	WBGene00119201	chrV	18350992	18352644	0	0	NA	NA	NA	NA	0	0.0255853	0.204042	0.331132	-0.642465	0.999975
C08E8.2	WBGene00007438	chrV	18353481	18355814	0	0	NA	NA	NA	NA	0	0.00975337	0.204042	0.331132	-0.642465	0.999975
C08E8.3	WBGene00007439	chrV	18350119	18350527	0.496598	4.07901	2.07283	9.28063	2.57635	0.293951	0.496598	1.28269	2.08237	4.59848	-1.08686	0.999975
C08E8.4	WBGene00007440	chrV	18371817	18373503	18.2177	22.3827	274.526	259.565	0.332888	0.954286	18.2177	19.9928	274.06	311.951	-0.130751	0.999975
C08E8.5	WBGene00007441	chrV	18359789	18359960	0	1.94778	0.350762	0.654047	1.31264	NA	0	14.2254	0.343257	8.15129	-4.5136	0.999975
C08E8.6	WBGene00007442	chrV	18367985	18368394	0.512318	0.496578	0.631512	0.190933	-1.31201	NA	0.512318	3.20662	0.588835	2.71924	-2.1512	0.999975
C08E8.9	WBGene00050891	chrV	18364829	18365196	0.826602	0.801205	0.631515	0.314795	-0.590671	NA	0.826602	5.17375	0.594681	2.42627	-1.97248	0.999975
C08F1.1	WBGene00015606	chrII	1797857	1801383	0	0	NA	NA	NA	NA	0	0.00629293	NA	NA	NA	NA
C08F1.10	WBGene00015613	chrII	1785267	1786283	1.08215	1.8144	23.3863	19.9317	0.183138	NA	1.08215	1.02093	23.437	19.2718	0.338371	NA
C08F1.11	WBGene00044417	chrII	1783281	1784448	0.502476	0.567622	10.0057	6.61833	-0.182543	0.98904	0.502476	0.733101	9.83556	12.3715	-0.274869	0.999975
C08F1.3	WBGene00015607	chrII	1789186	1790223	0.0415382	0.0351617	1.42242	0.314796	-1.76212	NA	0.0415382	0.0339951	1.40495	0.603822	1.2744	0.999975
C08F1.4	WBGene00015608	chrII	1767853	1778545	6.33077	5.04144	247.732	156.883	-0.245357	0.958598	6.33077	5.45646	247.384	217.014	0.245041	0.999975
C08F1.5	WBGene00015609	chrII	1778777	1782313	5.62356	3.38207	286.039	122.439	-0.81041	0.52247	5.62356	4.94782	286.077	261.31	0.186716	0.999975
C08F1.6	WBGene00015610	chrII	1787220	1788193	0.291528	0.798223	5.63163	8.70712	1.04238	0.954286	0.291528	0.526003	5.59715	9.75948	-0.746036	0.999975
C08F1.8	WBGene00015611	chrII	1804162	1808323	0.76007	1.40983	25.0826	38.7826	1.04245	0.842596	0.76007	1.51471	24.9441	53.5129	-1.04511	0.999975
C08F11.1	WBGene00007450	chrIV	13623810	13625518	15.6977	19.9297	178.409	169.434	0.339266	0.945973	15.6977	14.7393	178.06	172.389	0.102767	0.999975
C08F11.10	WBGene00007457	chrIV	13648012	13649186	0.409723	1.73469	7.29598	15.9199	1.53939	NA	0.409723	0.477107	7.29352	7.84707	-0.0494639	0.999975
C08F11.11	WBGene00007458	chrIV	13646706	13647634	208.513	270.958	1405.28	924.795	-0.189912	NA	208.513	273.42	1411.62	1723.62	-0.232016	NA
C08F11.12	WBGene00007459	chrIV	13650635	13651487	5.3051	11.0745	8.39136	12.3995	0.977039	NA	5.3051	5.2549	8.43346	4.5305	0.952528	0.999975
C08F11.13	WBGene00007460	chrIV	13607415	13609859	21.6262	18.1408	501.891	294.625	-0.354759	0.972136	21.6262	25.6615	500.425	658.614	-0.340203	0.999975
C08F11.17	WBGene00045069	chrIV	13649737	13650314	0	0	NA	NA	NA	NA	0	0	NA	NA	NA	NA
C08F11.2	WBGene00007451	chrIV	13621806	13623110	0	0	NA	NA	NA	NA	0	0.0634352	0.204044	1.13032	-2.41371	0.999975
C08F11.3	WBGene00007452	chrIV	13619483	13621489	1.66318	1.46753	30.0781	18.4388	-0.292237	0.972136	1.66318	2.91609	30.3606	55.1655	-0.80549	0.999975
C08F11.4	WBGene00005684	chrIV	13626744	13632673	0.0463025	0	0.70331	0.190933	-1.46736	NA	0.0463025	0.0467064	0.695927	0.957358	-0.404047	0.999975
C08F11.5	WBGene00007453	chrIV	13633414	13635196	1.97418	1.61481	38.7216	21.6246	-0.426734	0.945973	1.97418	2.41373	38.6621	48.5	-0.270988	0.999975
C08F11.7	WBGene00007454	chrIV	13637263	13638501	0.14166	0.653558	2.4143	7.55633	2.05982	0.92246	0.14166	1.06562	2.28823	18.1886	-2.93466	0.999975
C08F11.8	WBGene00007455	chrIV	13639241	13644377	46.3775	51.7942	1347.92	1102.08	0.123236	0.98246	46.3775	51.2758	1347.95	1569.81	-0.163745	0.999975
C08F11.9	WBGene00007456	chrIV	13644438	13645899	0.0343365	0.026725	0.587282	0.314794	-0.485909	NA	0.0343365	0.0217979	0.583133	0.722617	-0.253331	0.999975
C08F8.1	WBGene00007443	chrIV	11149832	11150911	64.1659	61.1021	717.766	508.012	-0.0849154	0.975718	64.1659	58.7347	718.386	667.608	0.161833	0.999975
C08F8.2	WBGene00007444	chrIV	11149167	11154314	11.3019	9.85324	524.223	308.674	-0.350362	0.945973	11.3019	11.5347	524.763	551.123	-0.014633	0.999975
C08F8.3	WBGene00007445	chrIV	11155007	11156674	6.3014	8.01525	232.264	153.912	-0.179928	NA	6.3014	7.78915	233.256	269.707	-0.153409	NA
C08F8.4	WBGene00007446	chrIV	11157127	11159471	0.16363	0.489582	6.88914	12.9941	1.32919	NA	0.16363	0.151437	6.82912	5.93845	0.257689	0.999975
C08F8.5	WBGene00007447	chrIV	11159548	11162508	0	0.0278025	0.204022	0.708174	2.20911	NA	0	0.0433018	0.204043	1.87743	-3.14574	0.999975
C08F8.6	WBGene00007448	chrIV	11162764	11164267	1.21449	1.81686	33.699	25.7209	0.0239707	NA	1.21449	1.22678	33.8694	30.6027	0.202398	NA
C08F8.7	WBGene00004309	chrIV	11177264	11178057	4.47376	2.94289	39.9515	17.7407	-0.757448	0.945973	4.47376	2.94056	40.2018	29.0541	0.52459	0.999975
C08F8.8	WBGene00003657	chrIV	11169812	11174764	3.10541	2.63833	84.7657	51.0696	-0.317279	0.9488	3.10541	3.14269	84.6976	87.0813	0.0160313	0.999975
C08F8.9	WBGene00007449	chrIV	11178056	11178576	185.104	179.488	262.742	194.859	-0.0174767	0.996419	185.104	300.385	262.208	440.169	-0.69127	0.999975
C08G5.1	WBGene00015614	chrII	734656	738673	0	0	NA	NA	NA	NA	0	0	NA	NA	NA	NA
C08G5.2	WBGene00015615	chrII	739556	740906	0.0758825	0.174647	1.98418	2.09605	0.492861	NA	0.0758825	0.0548529	1.92035	1.01867	0.970761	0.999975
C08G5.3	WBGene00015616	chrII	743105	745135	0.0907911	0.164741	2.02935	2.38992	0.649678	NA	0.0907911	0.0386355	2.05095	1.51208	0.495828	0.999975
C08G5.4	WBGene00004926	chrII	745468	750171	14.1701	21.0406	306.827	348.06	0.595647	0.945973	14.1701	18.7096	306.661	413.292	-0.374442	0.999975
C08G5.5	WBGene00015617	chrII	756200	764859	22.7711	30.3197	287.278	307.087	0.509934	0.945973	22.7711	29.796	287.837	385.673	-0.366051	0.999975
C08G5.6	WBGene00015618	chrII	770559	772124	0.918727	1.05831	9.81719	7.53881	0.0327614	0.99418	0.918727	1.13725	9.97299	12.2653	-0.242409	0.999975
C08G5.7	WBGene00044418	chrII	761588	765324	0.0470235	1.86e-07	NA	NA	NA	NA	0.0470235	0.0357904	NA	NA	NA	NA
C08G9.1	WBGene00015619	chrIV	7658722	7664151	18.1413	25.014	296.881	306.236	0.458494	0.945973	18.1413	22.3695	296.561	375.937	-0.28609	0.999975
C08G9.2	WBGene00015620	chrIV	7664165	7672961	1.32602	0.735133	181.904	74.2277	-0.879414	0.829877	1.32602	0.941658	182.01	135.371	0.483166	0.999975
C08H9.1	WBGene00007462	chrII	9875119	9877949	1.38122	1.3978	42.5296	32.3096	0.0172325	0.99451	1.38122	1.18356	42.4475	38.423	0.199785	0.999975
C08H9.10	WBGene00007469	chrII	9853751	9855636	0.168418	0.11991	4.47324	2.20411	-0.607387	NA	0.168418	0.176014	4.50913	4.0799	0.20039	0.999975
C08H9.11	WBGene00007470	chrII	9858050	9859580	0.421464	0.302365	9.48671	5.78429	-0.300034	0.975937	0.421464	0.484372	9.5533	11.7706	-0.245039	0.999975
C08H9.12	WBGene00007471	chrII	9855811	9857803	0.287004	0.209475	6.13444	2.92861	-0.652981	0.954286	0.287004	0.423855	6.03368	7.47318	-0.252609	0.999975
C08H9.13	WBGene00007472	chrII	9869396	9871113	0.242073	0.0736825	4.81742	1.49481	-1.27457	NA	0.242073	0.347975	4.83417	6.62874	-0.399394	0.999975
C08H9.14	WBGene00007473	chrII	9870494	9872927	0.0723902	0.099374	2.60308	2.31154	0.242368	NA	0.0723902	0.363699	2.39434	13.3894	-2.42731	0.999975
C08H9.15	WBGene00007474	chrII	9881133	9882473	21.4723	30.3321	191.727	195.616	0.442705	0.889121	21.4723	24.2664	191.388	218.737	-0.136619	0.999975
C08H9.16	WBGene00086566	chrII	9892729	9894313	12.5969	12.8904	242.042	153.411	-0.244116	0.966112	12.5969	12.3439	242.474	229.713	0.134072	0.999975
C08H9.2	WBGene00007463	chrII	9886478	9891029	391.84	238.196	29722.1	12130.8	-0.879131	0.296296	391.84	301.518	29753.4	22732.1	0.4444	0.999975
C08H9.3	WBGene00007464	chrII	9882668	9886383	6.0338	3.93444	301.738	143.035	-0.66319	NA	6.0338	6.50777	302.617	318.965	-0.0198296	NA
C08H9.4	WBGene00007465	chrII	9862371	9866345	0.885696	0.49915	15.6538	5.52214	-1.08948	0.922283	0.885696	1.25104	15.7152	17.6486	-0.11132	0.999975
C08H9.5	WBGene00003862	chrII	9866588	9868702	1.32783	1.27671	33.0339	24.3874	-0.0240758	0.995915	1.32783	1.51676	33.0468	41.3449	-0.267122	0.999975
C08H9.6	WBGene00007466	chrII	9873189	9874462	0.152847	0.129974	3.3336	1.99357	-0.327989	NA	0.152847	0.187272	3.3382	4.17219	-0.265662	0.999975
C08H9.7	WBGene00007467	chrII	9859724	9861414	0.317359	0.475075	6.13587	8.47829	0.880239	0.945973	0.317359	0.54107	6.18579	12.4423	-0.952151	0.999975
C09B7.1	WBGene00004780	chrX	2673462	2682353	2.10751	2.60942	76.2782	66.5077	0.215985	0.958598	2.10751	2.68266	76.4498	93.3449	-0.231983	0.999975
C09B7.2	WBGene00015621	chrX	2668128	2670584	25.4922	38.9845	240.008	233.767	0.375727	0.945973	25.4922	32.5611	239.83	317.02	-0.34649	0.999975
C09B8.1	WBGene00002146	chrX	6031433	6034475	15.6925	16.106	488.897	377.076	0.0390575	0.990246	15.6925	14.6242	488.968	474.643	0.0989708	0.999975
C09B8.3	WBGene00015622	chrX	6007167	6011275	2.07149	1.53042	48.837	27.1756	-0.431931	0.951901	2.07149	1.69746	48.8708	39.1677	0.375383	0.999975
C09B8.4	WBGene00015623	chrX	6018445	6019901	30.0384	34.0104	418.252	376.276	0.261154	0.976137	30.0384	23.1789	416.985	347.61	0.3186	0.999975
C09B8.5	WBGene00015624	chrX	6020830	6022458	0.481967	0.510119	10.829	8.19518	0.011685	0.998161	0.481967	0.526529	10.6676	12.8804	-0.215859	0.999975
C09B8.6	WBGene00002023	chrX	6034056	6039461	593.422	544.239	7261.63	4802.94	-0.182642	0.966112	593.422	649.824	7269.72	7697.65	-0.0264425	0.999975
C09B8.7	WBGene00003911	chrX	6044273	6048575	33.7685	24.0783	1160.53	608.509	-0.517697	0.783687	33.7685	31.1254	1161.39	1086.37	0.152407	0.999975
C09B8.8	WBGene00015625	chrX	6015456	6017549	1.69892	1.96807	10.9803	11.7024	0.505616	0.954286	1.69892	2.34817	11.074	17.3847	-0.594568	0.999975
C09B9.1	WBGene00015626	chrIV	5037806	5040430	0.997566	1.15177	19.6956	17.4857	0.242042	0.967469	0.997566	1.17019	19.8823	22.7721	-0.139705	0.999975
C09B9.2	WBGene00015627	chrIV	5029257	5031035	0.490505	0.962104	12.6129	12.2926	0.376623	NA	0.490505	0.435728	12.6736	10.2216	0.366281	0.999975
C09B9.3	WBGene00015628	chrIV	5021179	5029070	0.0584877	0.137298	2.84762	4.07278	0.929992	NA	0.0584877	0.049167	2.89795	2.26255	0.413161	0.999975
C09B9.4	WBGene00015629	chrIV	5031559	5033379	0.594436	1.23876	17.7383	19.4825	0.54905	NA	0.594436	0.88476	17.7836	24.0699	-0.380609	NA
C09B9.6	WBGene00003448	chrIV	5055584	5056041	14.5164	34.567	51.9455	45.8061	0.232276	NA	14.5164	11.1138	52.1079	37.2028	0.542165	NA
C09B9.7	WBGene00015630	chrIV	5056964	5059843	0.0857118	0.228935	6.49097	8.95152	0.877432	0.966793	0.0857118	0.138405	6.51965	9.3532	-0.46459	0.999975
C09B9.8	WBGene00044484	chrIV	5040917	5045388	11.3537	15.8087	116.53	123.376	0.496102	0.945973	11.3537	13.346	116.458	139.532	-0.204709	0.999975
C09C7.1	WBGene00006981	chrX	7925388	7926541	5.87096	12.021	102.066	155.494	1.02108	0.208941	5.87096	8.71379	101.853	153.688	-0.537442	0.999975
C09D1.1	WBGene00006820	chrI	4035745	4090963	55.7615	38.0458	18094.8	8313.16	-0.708368	0.842596	55.7615	45.6054	18084.2	13610.9	0.466041	0.999975
C09D1.2	WBGene00015631	chrI	4071800	4072850	1.20763	1.1464	17.0307	12.0851	-0.0811734	0.988177	1.20763	0.617361	16.9865	9.03766	0.966439	0.999975
C09D4.1	WBGene00015632	chrI	5497780	5506518	6.52661	6.60592	273.052	188.337	-0.122127	0.973322	6.52661	6.34349	272.709	254.173	0.157626	0.999975
C09D4.2	WBGene00015633	chrI	5491476	5493534	3.67281	8.19168	57.8209	83.9586	0.95182	0.898891	3.67281	4.99645	57.4896	77.8798	-0.381874	0.999975
C09D4.3	WBGene00015634	chrI	5488342	5490629	0.172267	1.01675	5.87014	19.5565	2.14991	NA	0.172267	0.338747	5.80289	11.2748	-0.902182	0.999975
C09D4.4	WBGene00015635	chrI	5479543	5484646	12.2562	9.9624	934.521	426.588	-0.717648	NA	12.2562	12.2284	937.422	893.931	0.12461	NA
C09D4.5	WBGene00004431	chrI	5484769	5486357	2806.91	3692.64	25385.2	25358	0.412187	0.945973	2806.91	3335.68	25384.3	30711.3	-0.218757	0.999975
C09D4.6	WBGene00015636	chrI	5486489	5487153	0	0	NA	NA	NA	NA	0	0	NA	NA	NA	NA
C09D8.1	WBGene00004215	chrII	10968325	11012333	21.228	24.6602	2492.42	1900.23	0.0223602	0.991095	21.228	21.6987	2493.03	2593.33	-0.000830859	0.999975
C09E10.2	WBGene00000958	chrX	984617	991232	11.2338	11.2523	683.718	480.746	-0.0943925	0.984242	11.2338	9.87284	683.541	649.956	0.128762	0.999975
C09E7.1	WBGene00015637	chrIII	6532506	6533766	0.0314934	0.0522115	0.520761	0.618639	0.66221	NA	0.0314934	0.0510268	0.522405	0.860942	-0.664673	0.999975
C09E7.10	WBGene00044295	chrIII	6518660	6520003	1.50309	1.80182	17.4113	13.9281	0.0917081	0.989836	1.50309	1.66898	17.4437	19.0923	-0.0742108	0.999975
C09E7.2	WBGene00004102	chrIII	6528148	6532035	0.520416	0.661905	12.0722	13.2742	0.550671	0.954286	0.520416	0.493364	12.0596	12.4047	0.0153694	0.999975
C09E7.3	WBGene00003859	chrIII	6524048	6525607	7.20697	6.74216	38.1742	26.5235	-0.111595	0.985519	7.20697	6.50378	38.1595	37.7511	0.071597	0.999975
C09E7.4	WBGene00015638	chrIII	6534413	6536942	5.66401	4.50573	215.114	123.051	-0.392112	0.945973	5.66401	6.58618	214.958	259.902	-0.21784	0.999975
C09E7.5	WBGene00015639	chrIII	6538047	6541259	0.0556959	0	1.94719	0.314795	-2.21517	NA	0.0556959	0.0393427	1.8799	1.51204	0.370237	0.999975
C09E7.6	WBGene00015640	chrIII	6545286	6546351	1.21487	1.74059	9.48636	8.62131	0.275787	0.974337	1.21487	0.779665	9.44446	6.51894	0.590906	0.999975
C09E7.7	WBGene00015641	chrIII	6546670	6551225	6.50914	5.90001	221.186	123.669	-0.425039	0.949003	6.50914	6.85686	220.791	240.407	-0.0667263	0.999975
C09E7.8	WBGene00015642	chrIII	6553506	6558522	2.75923	2.64874	187.679	113.19	-0.315786	0.959966	2.75923	3.50147	188.205	237.89	-0.281911	NA
C09E7.9	WBGene00015643	chrIII	6541554	6545120	2.74823	2.58138	131.431	79.2275	-0.316503	0.954286	2.74823	2.59194	131.172	112.939	0.271987	0.999975
C09E8.1	WBGene00015644	chrII	556483	564123	21.4086	16.6761	1057.91	609.273	-0.382315	0.945973	21.4086	23.5828	1058.48	1193	-0.116532	0.999975
C09E8.2	WBGene00015645	chrII	553093	554785	8.32755	7.80208	130.424	92.535	-0.0813979	0.98904	8.32755	8.08136	130.076	129.504	0.0624305	0.999975
C09E8.3	WBGene00015646	chrII	546703	552025	176.946	63.3952	8077.85	2123.12	-1.51405	0.000534453	176.946	101.008	8082.73	4672.73	0.846653	0.760693
C09E9.1	WBGene00007476	chrIV	1275864	1277091	24.4247	38.7664	216.185	256.798	0.662107	0.545182	24.4247	26.8829	215.624	245.693	-0.132263	0.999975
C09F12.1	WBGene00000522	chrX	11047348	11049166	34.2183	26.5476	336.58	199.005	-0.344411	0.949003	34.2183	26.5315	336.686	277.184	0.336635	0.999975
C09F12.2	WBGene00007482	chrX	11053877	11056904	2.80613	2.10733	107.362	63.0314	-0.354601	0.954286	2.80613	3.86567	107.339	148.523	-0.412438	0.999975
C09F12.3	WBGene00007483	chrX	11040965	11042791	1.10224	0.560594	23.3067	9.20823	-0.926011	0.904943	1.10224	1.26525	23.3573	29.0619	-0.259178	0.999975
C09F5.1	WBGene00015647	chrIII	658705	662731	30.7007	40.2889	1102.32	1075.65	0.378398	0.945973	30.7007	36.359	1101.52	1361.09	-0.249194	0.999975
C09F5.2	WBGene00015648	chrIII	647122	654460	12.5111	14.1169	244.075	212.728	0.215417	0.952818	12.5111	13.0876	244.12	261.732	-0.0444245	0.999975
C09F5.3	WBGene00015649	chrIII	662843	666261	0.762436	0.696739	16.2887	10.0235	-0.286742	0.960868	0.762436	0.734817	16.1622	15.2431	0.14054	0.999975
C09F9.1	WBGene00007478	chrII	14698639	14699256	0.243079	0.75993	1.91969	3.01463	1.06484	NA	0.243079	0.20605	1.92799	1.45953	0.457662	0.999975
C09F9.2	WBGene00007479	chrII	14705440	14712525	45.9147	31.6272	3413.73	1696.21	-0.595302	0.945973	45.9147	34.2791	3413.32	2559.48	0.471399	0.999975
C09F9.3	WBGene00007480	chrII	14720476	14733383	4.60187	7.95167	72.9562	85.6434	0.645045	0.899037	4.60187	5.21349	72.8651	73.8646	0.0364181	0.999975
C09G1.1	WBGene00004103	chrX	15966040	15972229	0.130157	0.249944	4.2295	4.20295	0.404649	0.9772	0.130157	0.0340922	4.18874	1.08515	2.00469	0.999975
C09G1.2	WBGene00007484	chrX	15977690	15982529	0.486111	0.603092	34.6025	34.1177	0.393376	0.957633	0.486111	0.365695	34.4949	27.6827	0.373473	0.999975
C09G1.3	WBGene00007485	chrX	15986091	15987523	0.0336762	0.0709705	0.512288	0.314794	-0.288812	NA	0.0336762	0.0258585	0.51158	0.343769	0.629594	0.999975
C09G1.4	WBGene00007486	chrX	15987900	15996865	8.12046	9.01145	319.033	249.791	0.0607483	0.985519	8.12046	9.19819	319.459	362.35	-0.125678	0.999975
C09G1.5	WBGene00007487	chrX	15959028	15962250	21.6876	44.0781	239.08	307.855	0.778496	0.834912	21.6876	22.7584	239.334	249.161	-0.00197946	0.999975
C09G12.1	WBGene00015651	chrIV	3502135	3503909	1.10559	1.64157	10.5819	11.2565	0.502887	0.945973	1.10559	1.54765	10.5537	15.553	-0.50337	0.999975
C09G12.10	WBGene00023462	chrIV	3504440	3506112	0.0351708	0	0.587281	0.190933	-1.20725	NA	0.0351708	0.0223274	0.582655	1.3231	-1.12713	0.999975
C09G12.11	WBGene00023463	chrIV	3482891	3484703	0.0800185	0.0275978	1.15936	0.314796	-1.46711	NA	0.0800185	0.0567678	1.17794	0.93927	0.382728	0.999975
C09G12.16	WBGene00023474	chrIV	3480007	3481857	0.02439	0	0.70331	0.190933	-1.46736	NA	0.02439	0	0.7057	0.20377	1.84819	0.999975
C09G12.17	WBGene00044470	chrIV	3495292	3496437	0	0.104027	0.204021	0.314792	1.03942	NA	0	0	NA	NA	NA	NA
C09G12.2	WBGene00015652	chrIV	3493606	3495176	0.0230014	0	0.350759	0.190932	-0.463682	NA	0.0230014	0	0.350433	0.331133	0.137803	0.999975
C09G12.3	WBGene00015653	chrIV	3491773	3493213	0.016706	0.0168519	0.350761	0.476327	0.855197	NA	0.016706	0.0128278	0.350231	0.502618	-0.465081	0.999975
C09G12.5	WBGene00015655	chrIV	3479331	3479727	0.112814	0	0.631513	0.190933	-1.31201	NA	0.112814	0	0.629875	0.20377	1.6842	0.999975
C09G12.6	WBGene00015656	chrIV	3477388	3479008	0	0	NA	NA	NA	NA	0	0	NA	NA	NA	NA
C09G12.8	WBGene00000424	chrIV	3506285	3509526	40.0091	33.5475	892.071	432.063	-0.632183	0.862473	40.0091	35.843	892.682	823.625	0.172234	0.999975
C09G12.9	WBGene00015658	chrIV	3510470	3514559	62.8769	75.3599	1609.63	1247.79	0.0463834	0.989836	62.8769	64.8349	1612.84	1640.53	0.0315142	0.999975
C09G4.1	WBGene00002043	chrIV	8540540	8544366	23.251	16.3581	690.118	335.758	-0.625686	0.945973	23.251	18.03	691.49	569.84	0.335226	0.999975
C09G4.2	WBGene00015650	chrIV	8520880	8538173	45.616	58.7445	1897.5	1257.94	-0.179308	0.959966	45.616	43.8532	1899.43	1893.54	0.0605583	0.999975
C09G4.3	WBGene00001051	chrIV	8513914	8514711	250.379	97.1779	NA	NA	NA	NA	250.379	225.227	NA	NA	NA	NA
C09G4.4	WBGene00044001	chrIV	8513409	8513753	39.6256	21.4039	NA	NA	NA	NA	39.6256	23.6846	NA	NA	NA	NA
C09G4.5	WBGene00003224	chrIV	8511270	8514709	14.9882	11.4927	621.508	299.876	-0.637672	0.945973	14.9882	16.1931	622.906	652.255	-0.0103476	0.999975
C09G5.1	WBGene00001586	chrII	10694994	10702465	2.28748	2.90606	69.0208	67.3585	0.378562	0.954286	2.28748	2.27015	69.1036	71.3803	0.00930998	0.999975
C09G5.2	WBGene00007488	chrII	10702173	10714240	6.248	6.70268	243.154	171.379	-0.0909434	0.983518	6.248	6.27342	243.582	238.242	0.088056	0.999975
C09G5.3	WBGene00000655	chrII	10703558	10704515	4.48865	7.89776	76.4808	83.3244	0.537376	0.954286	4.48865	2.97551	76.2787	45.7296	0.794225	0.999975
C09G5.4	WBGene00000616	chrII	10704843	10705961	443.088	810.617	7642.27	11817.3	1.04256	0.838762	443.088	496.15	7632	8864.77	-0.159947	0.999975
C09G5.5	WBGene00000656	chrII	10707143	10708227	346.406	431.954	7433.46	5788.87	0.0529811	0.991345	346.406	509.606	7453.11	10213.1	-0.398428	NA
C09G5.6	WBGene00000251	chrII	10708900	10712066	16.6695	9.07612	1413.69	375.896	-1.49732	NA	16.6695	2.67835	1419.94	205.456	2.845	NA
C09G5.7	WBGene00007489	chrII	10714853	10716395	0.385931	0.742681	11.48	12.1672	0.497604	0.966112	0.385931	0.375738	11.4891	10.3732	0.203486	0.999975
C09G5.8	WBGene00007490	chrII	10717276	10729193	0.992145	1.07381	92.9001	77.6522	0.155081	0.976137	0.992145	0.902813	92.7788	89.4025	0.109555	0.999975
C09G9.1	WBGene00007492	chrIV	8862474	8865477	83.6406	79.7598	2999.29	1831.82	-0.297612	0.956137	83.6406	94.2177	3005.28	3333.22	-0.0933396	0.999975
C09G9.2	WBGene00007493	chrIV	8868023	8869668	17.8322	19.7416	430.737	303.063	-0.0934555	0.984805	17.8322	20.2645	431.547	470.731	-0.0693108	0.999975
C09G9.3	WBGene00007494	chrIV	8869948	8873044	0.183579	0.402462	2.91323	3.79062	0.793549	NA	0.183579	0.481992	3.03894	5.03939	-0.673609	0.999975
C09G9.4	WBGene00006409	chrIV	8874133	8876963	0.0587681	0.283202	2.69505	7.14714	1.82079	0.945973	0.0587681	0.0633123	2.73161	3.33621	-0.232381	0.999975
C09G9.5	WBGene00007495	chrIV	8886512	8888589	2.5942	1.5353	28.8915	12.8655	-0.753405	0.945973	2.5942	2.65248	28.7409	31.0321	-0.0545805	0.999975
C09G9.6	WBGene00003864	chrIV	8888959	8890987	88.1312	25.4459	4317.31	607.46	-2.41554	NA	88.1312	74.6687	4336.84	3330.72	0.436885	NA
C09G9.7	WBGene00007496	chrIV	8877515	8879880	0.292283	0.146201	4.90774	1.19832	-1.62031	NA	0.292283	0.300336	4.90707	4.43511	0.201967	0.999975
C09G9.8	WBGene00007497	chrIV	8881470	8882402	0.181888	0.227452	1.18896	0.61783	-0.530685	NA	0.181888	0.294491	1.1368	1.0622	0.153989	0.999975
C09H10.1	WBGene00004455	chrII	11092690	11093796	0.288551	0.257635	3.36645	1.85745	-0.444168	NA	0.288551	0.0251787	3.33541	0.333485	3.37825	0.999975
C09H10.10	WBGene00007504	chrII	11094986	11096417	7.36526	7.68221	177.518	120.64	-0.143527	0.9772	7.36526	6.87967	178.032	162.709	0.185914	0.999975
C09H10.2	WBGene00004454	chrII	11096508	11097148	5212.08	6482.59	17524.1	16647.9	0.339735	0.945973	5212.08	6670.24	17518.8	23120.4	-0.344187	0.999975
C09H10.3	WBGene00003831	chrII	11097782	11100260	187.609	214.878	5878.85	5208.15	0.238973	0.954286	187.609	181.471	5876.3	5800.97	0.0746902	0.999975
C09H10.5	WBGene00007499	chrII	11100913	11102890	30.2514	48.1247	184.981	199.322	0.521456	0.928376	30.2514	41.2038	185.042	254.948	-0.406276	0.999975
C09H10.6	WBGene00007500	chrII	11106557	11108365	23.9995	26.9738	807.634	573.529	-0.0801019	0.989474	23.9995	25.9184	809.355	860.853	-0.032919	0.999975
C09H10.7	WBGene00007501	chrII	11108126	11109525	17.8233	10.4754	360.398	113.544	-1.2526	0.898891	17.8233	14.9471	361.471	291.316	0.367373	NA
C09H10.8	WBGene00007502	chrII	11109525	11111111	3.38482	4.09698	62.1864	58.0662	0.314835	0.957633	3.38482	4.14105	62.2231	74.5012	-0.20374	0.999975
C09H10.9	WBGene00007503	chrII	11104403	11105988	0.179491	0.423713	5.15773	6.47954	0.742891	0.958598	0.179491	0.185128	5.23857	5.01145	0.120018	0.999975
C09H5.1	WBGene00015659	chrV	8082346	8082747	0	0	NA	NA	NA	NA	0	0	NA	NA	NA	NA
C09H5.2	WBGene00015660	chrV	8076064	8079894	13.7853	20.9135	868.486	991.771	0.605239	0.945973	13.7853	29.5315	865.197	1978.59	-1.1373	0.999975
C09H5.3	WBGene00006188	chrV	8065759	8067880	0	0	0.350759	0.190932	-0.463682	NA	0	0	0.350432	0.203769	0.838272	0.999975
C09H5.4	WBGene00006190	chrV	8068131	8069709	0	0	NA	NA	NA	NA	0	0.0110802	0.204043	0.502404	-1.2439	0.999975
C09H5.5	WBGene00006191	chrV	8070622	8072124	0.350187	0.298756	7.47272	4.15479	-0.433125	0.966112	0.350187	0.403211	7.41442	9.51102	-0.30319	0.999975
C09H5.6	WBGene00006180	chrV	8080346	8081658	0.210031	0.0920823	3.62813	1.03298	-1.39868	NA	0.210031	0.217913	3.70159	3.87031	-0.00822752	0.999975
C09H5.7	WBGene00015661	chrV	8084099	8085221	0.0813065	0.394166	1.89294	4.73048	1.73509	NA	0.0813065	0.0918947	1.92799	1.97075	0.0244307	0.999975
C09H5.9	WBGene00006179	chrV	8089298	8090675	0.0489935	0.0857424	1.47172	1.09171	-0.0171841	NA	0.0489935	0.0475295	1.458	0.863625	0.811587	0.999975
C09H6.1	WBGene00005009	chrI	8103595	8109222	14.3052	16.0438	1246.58	942.071	0.00966248	0.996419	14.3052	15.7051	1246.43	1396.29	-0.107722	0.999975
C09H6.2	WBGene00002999	chrI	8109737	8119309	19.4107	18.4552	1203.54	794.901	-0.184701	0.95201	19.4107	17.6649	1203.49	1124.54	0.15396	0.999975
C09H6.3	WBGene00003136	chrI	8125793	8130081	8.53525	7.09732	381.683	192.031	-0.577303	0.945973	8.53525	10.1386	382.421	447.037	-0.169158	0.999975
C10A4.1	WBGene00015662	chrX	7415793	7418582	0.164746	0.11618	6.87106	3.01454	-0.774859	0.954286	0.164746	0.0984321	6.82276	3.81508	0.894717	0.999975
C10A4.10	WBGene00050957	chrX	7398921	7400812	3.22829	4.72734	48.9917	49.7086	0.434693	0.95201	3.22829	3.13365	49.0136	46.0858	0.144935	0.999975
C10A4.2	WBGene00015663	chrX	7412449	7412704	0	0	0.204021	0.314792	1.03942	NA	0	0.160357	0.204043	0.607425	-1.51776	0.999975
C10A4.3	WBGene00015664	chrX	7407409	7408736	1.99882	1.75731	23.8895	14.2336	-0.333348	0.957525	1.99882	1.86042	23.6741	21.3961	0.202035	0.999975
C10A4.4	WBGene00015665	chrX	7402084	7403567	0.839304	0.722041	13.4588	7.15837	-0.497108	0.960182	0.839304	1.05987	13.6163	16.8852	-0.254347	0.999975
C10A4.5	WBGene00015666	chrX	7393870	7396270	0.336495	0.366101	12.7602	9.59942	0.00310242	0.998755	0.336495	0.266664	12.8892	10.5073	0.350841	0.999975
C10A4.6	WBGene00015667	chrX	7390527	7392230	0.0510552	0.0928439	0.868458	1.63831	1.32941	NA	0.0510552	0.109664	0.855238	1.97486	-1.15127	0.999975
C10A4.7	WBGene00015668	chrX	7413565	7415475	0.186405	0.348118	2.28946	2.74787	0.67704	NA	0.186405	0.179898	2.29538	2.23751	0.0929128	0.999975
C10A4.8	WBGene00003380	chrX	7422627	7424836	2.17695	2.08826	33.3925	23.0412	-0.121574	0.976137	2.17695	2.0677	33.5304	31.6502	0.139332	0.999975
C10A4.9	WBGene00045456	chrX	7420854	7421892	0.205215	0.545057	1.86896	3.3122	1.23929	NA	0.205215	0.0784119	1.82795	0.732979	1.37446	0.999975
C10B5.1	WBGene00015670	chrV	8581238	8583555	0.951318	1.30149	20.503	15.7444	0.0327427	0.996419	0.951318	1.72064	20.5146	34.2481	-0.683299	0.999975
C10B5.3	WBGene00015671	chrV	8583531	8584510	38.7131	44.0354	507.131	391.614	0.0408081	0.990966	38.7131	45.6427	507.824	569.085	-0.108239	0.999975
C10C5.1	WBGene00007505	chrIV	9359423	9366489	15.0453	10.2692	696.961	326.685	-0.679446	0.945973	15.0453	11.1436	697.728	542.865	0.418147	0.999975
C10C5.2	WBGene00007506	chrIV	9371490	9373619	1.03771	0.738786	28.8038	15.0043	-0.527147	0.958598	1.03771	0.66325	28.8731	19.6276	0.612914	0.999975
C10C5.3	WBGene00007507	chrIV	9374212	9376475	0.427221	1.5179	12.6388	23.5276	1.31023	0.945973	0.427221	0.367007	12.5655	8.8256	0.565777	0.999975
C10C5.4	WBGene00007508	chrIV	9378585	9380433	1.29419	3.13547	40.8244	52.8821	0.787081	0.952818	1.29419	1.17416	40.9906	35.3516	0.269594	NA
C10C5.5	WBGene00007509	chrIV	9381403	9383098	0.491435	1.6065	6.36882	10.9083	1.19006	0.933965	0.491435	0.494988	6.35593	6.37345	0.0521054	0.999975
C10C5.6	WBGene00000911	chrIV	9386190	9394905	26.5902	21.9126	3444.86	1780.4	-0.538505	0.945973	26.5902	22.787	3449.34	2969.76	0.272046	0.999975
C10C5.7	WBGene00007511	chrIV	9385106	9385602	52.346	83.2217	97.6699	126.76	0.789844	0.915652	52.346	75.4583	97.4577	147.911	-0.545804	0.999975
C10C6.1	WBGene00002192	chrIV	11425719	11447043	32.705	24.8257	4731.71	1813.27	-0.970036	NA	32.705	32.3766	4746.17	4409.86	0.162104	NA
C10C6.2	WBGene00007006	chrIV	11459969	11463173	3.02696	2.55636	61.2048	40.92	-0.167101	0.98246	3.02696	3.45221	61.1743	73.118	-0.201227	0.999975
C10C6.3	WBGene00007512	chrIV	11463514	11465204	0.056256	0.383489	1.39442	4.89782	2.22621	NA	0.056256	0.051555	1.40588	1.10411	0.404667	0.999975
C10C6.5	WBGene00007513	chrIV	11470162	11473395	7.49446	7.45865	323.237	195.411	-0.312348	NA	7.49446	8.09657	324.195	339.95	-0.0123853	NA
C10C6.6	WBGene00007514	chrIV	11473344	11479231	32.7193	21.0956	2575.32	1155.49	-0.742511	0.604536	32.7193	30.5953	2576.35	2499.25	0.0999081	0.999975
C10C6.7	WBGene00007515	chrIV	11465406	11467331	2.00268	2.46455	21.3601	17.4361	0.120894	0.98246	2.00268	1.60992	21.152	17.3697	0.340292	0.999975
C10E2.1	WBGene00015672	chrX	16763635	16766583	0.134136	0.239064	1.94207	2.18754	0.58545	NA	0.134136	0.290569	1.82083	4.03039	-1.09025	0.999975
C10E2.2	WBGene00015673	chrX	16745665	16748135	1.3673	1.88414	38.0878	39.8688	0.479668	0.945973	1.3673	1.1866	38.2512	35.8074	0.151322	0.999975
C10E2.3	WBGene00001837	chrX	16729485	16744625	26.1675	25.8324	1921.7	1294.86	-0.155854	0.959966	26.1675	26.4214	1921.84	1969.64	0.0206318	0.999975
C10E2.4	WBGene00015674	chrX	16749681	16751037	1.80178	1.63353	10.6115	7.52772	-0.0816107	0.989836	1.80178	2.01747	10.5729	11.9119	-0.115953	0.999975
C10E2.5	WBGene00015675	chrX	16751790	16753600	1.03968	1.12754	6.84434	5.83045	0.182429	0.985519	1.03968	0.839175	6.85693	5.57726	0.354082	0.999975
C10E2.6	WBGene00015676	chrX	16767106	16770427	85.4168	55.2432	3767.89	1780.41	-0.667816	0.695489	85.4168	74.4765	3768.86	3354.46	0.224122	0.999975
C10F3.1	WBGene00015677	chrV	5996339	5999329	7.23387	6.88272	501.124	241.09	-0.64186	NA	7.23387	7.79081	503.299	498.07	0.0711426	NA
C10F3.2	WBGene00000979	chrV	5983727	5985494	4.10783	3.0825	96.6363	52.8122	-0.457959	0.945973	4.10783	3.43338	96.9924	84.9172	0.24789	0.999975
C10F3.3	WBGene00000069	chrV	5976011	5981496	1.39908	1.58714	86.4718	75.0766	0.209868	0.974337	1.39908	1.49889	86.3996	99.2742	-0.14432	0.999975
C10F3.4	WBGene00015678	chrV	5961795	5969137	10.2544	10.2744	263.168	206.367	0.0629602	0.989836	10.2544	12.9105	262.899	346.323	-0.341537	0.999975
C10F3.5	WBGene00003954	chrV	5960566	5963820	12.381	16.2419	181.636	186.774	0.45398	0.945973	12.381	14.9362	181.461	232.538	-0.301738	0.999975
C10F3.6	WBGene00001508	chrV	5986949	5990235	9.33617	6.62555	369.945	191.424	-0.536805	0.891445	9.33617	6.83171	370.291	272.736	0.497226	0.999975
C10F3.7	WBGene00015679	chrV	5985422	5986837	0.782463	1.15346	8.29083	8.41499	0.435179	0.959966	0.782463	0.538044	8.3064	5.82834	0.567213	0.999975
C10G11.1	WBGene00015685	chrI	6307328	6308431	0	0.056424	0.204022	0.618636	2.0141	NA	0	0.0110287	0.204042	0.331132	-0.642465	0.999975
C10G11.10	WBGene00015690	chrI	6305027	6306382	0.0927305	0.158793	1.08847	1.18841	0.540457	NA	0.0927305	0.0513987	1.06414	0.534989	1.04818	0.999975
C10G11.2	WBGene00005273	chrI	6302475	6304265	0.0357157	0.0160493	0.631515	0.314795	-0.590671	NA	0.0357157	0.0631614	0.609869	1.1456	-0.853458	0.999975
C10G11.3	WBGene00005274	chrI	6300494	6302300	0	0.022842	0.204021	0.314792	1.03942	NA	0	0.0186309	0.204042	0.343882	-0.696972	0.999975
C10G11.4	WBGene00005272	chrI	6297768	6299731	0.0430951	0.078803	1.11461	1.01243	0.275019	NA	0.0430951	0.0778104	1.08194	1.43235	-0.348685	0.999975
C10G11.5	WBGene00004068	chrI	6294897	6297638	24.8662	31.9181	768.832	647.784	0.166579	0.959966	24.8662	26.12	769.162	818.078	-0.032876	0.999975
C10G11.6	WBGene00015686	chrI	6289432	6293857	23.0856	8.34921	717.498	151.141	-1.83335	NA	23.0856	19.5283	720.177	586.366	0.352625	NA
C10G11.7	WBGene00015687	chrI	6284972	6289342	117.355	113.803	3595.65	2031.15	-0.410222	0.945973	117.355	121.886	3599.41	3661.71	0.0313203	0.999975
C10G11.8	WBGene00015688	chrI	6271982	6273770	0.81199	3.17183	32.1061	58.4205	1.27736	NA	0.81199	0.74437	32.1895	25.4628	0.394271	NA
C10G11.9	WBGene00015689	chrI	6274576	6275270	4.62028	21.3893	7.89997	22.1465	1.9009	NA	4.62028	4.81892	7.91525	2.60943	1.65698	0.999975
C10G6.1	WBGene00015680	chrIV	5820358	5830189	32.973	29.5833	1243.01	838.331	-0.154516	0.957633	32.973	31.1707	1242.81	1199.87	0.106803	0.999975
C10G8.1	WBGene00005183	chrV	5331250	5333039	0.0482615	0	0.795373	0.190933	-1.64483	NA	0.0482615	0.119166	0.792033	1.97849	-1.26469	0.999975
C10G8.2	WBGene00015681	chrV	5314387	5315573	0	0.0243137	0.328123	0.314793	0.353903	NA	0	0.0187484	0.328339	0.331133	0.0438514	0.999975
C10G8.3	WBGene00015682	chrV	5312873	5314273	1.18362	1.79253	11.3557	13.0964	0.619496	0.958598	1.18362	0.860622	11.4881	7.25458	0.719245	0.999975
C10G8.4	WBGene00015683	chrV	5311918	5312300	12.8971	69.4176	51.9931	136.945	1.81093	NA	12.8971	35.1146	52.1932	130.693	-1.26818	NA
C10G8.5	WBGene00003567	chrV	5303670	5311230	114.995	125.994	8149.77	6758.53	0.143685	0.972136	114.995	117.983	8143.09	8604	-0.0233555	0.999975
C10G8.6	WBGene00000455	chrV	5315496	5319561	12.0391	14.2916	235.112	202.959	0.201579	0.953771	12.0391	13.6524	235.023	261.091	-0.0956759	0.999975
C10G8.7	WBGene00000454	chrV	5323187	5324600	1.62269	2.90632	21.4714	29.0708	0.850885	0.945973	1.62269	2.51384	21.4121	35.3388	-0.666752	0.999975
C10G8.8	WBGene00015684	chrV	5324781	5328454	62.1684	55.6738	1382.47	858.71	-0.273274	0.945973	62.1684	53.9643	1383.64	1188.65	0.275213	0.999975
C10H11.1	WBGene00015691	chrI	4747627	4759602	9.45255	10.7072	623.072	454.243	-0.0422003	0.990966	9.45255	9.92979	623.956	659.308	-0.0234339	0.999975
C10H11.10	WBGene00015698	chrI	4759817	4761324	15.3609	10.4485	493.188	156.043	-1.24646	NA	15.3609	13.9234	495.422	410.222	0.328327	NA
C10H11.3	WBGene00015692	chrI	4731604	4735280	4.73823	5.44262	143.973	118.427	0.131936	0.976137	4.73823	4.41387	144.639	141.003	0.0928	0.999975
C10H11.4	WBGene00015693	chrI	4727301	4730367	2.78303	4.93531	85.9498	108.077	0.744227	0.945973	2.78303	3.09978	85.9203	100.705	-0.172993	0.999975
C10H11.5	WBGene00015694	chrI	4724065	4726780	0.0561284	0.241322	1.79855	5.54521	2.03814	0.703703	0.0561284	0.22212	1.78431	7.55647	-2.02627	0.999975
C10H11.6	WBGene00015695	chrI	4721178	4723961	10.9526	22.0481	341.099	476.52	0.896081	0.945973	10.9526	9.94516	340.827	328.111	0.110929	0.999975
C10H11.7	WBGene00015696	chrI	4719789	4721099	0.215751	0.383802	5.37974	4.71966	0.22488	0.990966	0.215751	0.171361	5.40307	3.61373	0.636366	0.999975
C10H11.8	WBGene00015697	chrI	4735756	4737848	5.4112	5.6242	150.217	96.7728	-0.220637	0.960494	5.4112	5.82207	150.373	161.647	-0.0482227	0.999975
C10H11.9	WBGene00002694	chrI	4738170	4744322	39.3692	23.2357	4423.94	1450.15	-1.1954	NA	39.3692	35.5752	4437.32	3740.05	0.302705	NA
C11D2.1	WBGene00015699	chrIV	6191274	6191538	0	0	NA	NA	NA	NA	0	0	NA	NA	NA	NA
C11D2.2	WBGene00015700	chrIV	6185876	6189194	0.360878	0.498512	8.35691	8.53532	0.444211	0.952509	0.360878	0.506556	8.39211	15.5564	-0.834329	0.999975
C11D2.3	WBGene00015701	chrIV	6154094	6154612	0.942025	3.76749	5.12679	10.5481	1.45458	0.870506	0.942025	1.56511	4.94324	7.02104	-0.450153	0.999975
C11D2.4	WBGene00015702	chrIV	6155481	6156895	13.7519	11.3261	294.088	170.947	-0.368967	0.945973	13.7519	13.9303	293.98	320.25	-0.0674049	0.999975
C11D2.6	WBGene00006809	chrIV	6157298	6173029	2.2216	2.11641	229.71	167.355	-0.0431677	0.990966	2.2216	2.05517	229.272	235.226	0.0190863	0.999975
C11D2.7	WBGene00015703	chrIV	6154545	6155390	40.0731	40.6572	434.538	330.356	0.0182735	0.993677	40.0731	39.3894	435.303	447.532	0.0161035	0.999975
C11D9.1	WBGene00015704	chrI	4422032	4426177	4.55213	4.29601	159.314	112.039	-0.0941401	0.98246	4.55213	4.69533	159.295	173.896	-0.0704567	0.999975
C11E4.1	WBGene00007516	chrX	9584614	9586433	54.1569	63.9477	750.708	698.847	0.310459	0.953771	54.1569	56.204	751.254	807.243	-0.0476277	0.999975
C11E4.2	WBGene00007517	chrX	9587884	9588822	18.5468	36.9715	202.536	351.429	1.20879	0.798272	18.5468	21.8743	202.49	246.58	-0.228131	0.999975
C11E4.3	WBGene00007518	chrX	9589365	9595433	0.493005	0.511875	18.4691	14.9619	0.109909	0.982265	0.493005	0.545001	18.4126	20.5539	-0.102643	0.999975
C11E4.6	WBGene00007520	chrX	9610503	9616967	8.94547	8.07019	690.944	448.388	-0.210086	0.954286	8.94547	7.5229	691.499	607.941	0.241871	0.999975
C11E4.7	WBGene00007521	chrX	9617189	9618751	2.7806	0.709634	69.1297	8.66806	-2.58179	NA	2.7806	3.47966	69.4799	78.5193	-0.120377	NA
C11E4.8	WBGene00007522	chrX	9623246	9624657	0.888163	0.940178	8.53191	7.20126	0.169115	0.985519	0.888163	1.20559	8.58265	12.6267	-0.500912	0.999975
C11G10.1	WBGene00007525	chrX	15157287	15158547	7.56768	18.1754	84.5758	153.297	1.27175	0.0267105	7.56768	9.33676	84.7548	108.613	-0.301754	0.999975
C11G10.2	WBGene00007526	chrX	15141934	15142334	11.5961	11.2556	48.3922	35.1369	-0.048052	0.990966	11.5961	8.96531	48.9418	38.6732	0.395807	0.999975
C11G6.1	WBGene00006384	chrX	16332367	16335868	4.99324	4.47932	191.686	114.262	-0.332668	0.945973	4.99324	4.84566	191.408	188.75	0.0762462	0.999975
C11G6.2	WBGene00007523	chrX	16329144	16329925	0	0.042966	0.204022	0.484034	1.66012	NA	0	0.032706	0.204042	0.343882	-0.696972	0.999975
C11G6.3	WBGene00007524	chrX	16340640	16345955	15.0598	12.6709	511.272	273.086	-0.491002	0.945973	15.0598	14.7548	512.234	474.439	0.166654	0.999975
C11G6.4	WBGene00003624	chrX	16354903	16359582	9.32577	13.6717	275.213	312.2	0.595657	0.945973	9.32577	8.98146	275.026	277.899	0.0410845	0.999975
C11H1.2	WBGene00007528	chrX	14304862	14307697	3.48321	1.88356	105.441	39.864	-0.989541	0.787274	3.48321	3.20499	105.402	100.336	0.127143	0.999975
C11H1.3	WBGene00007529	chrX	14307792	14311613	11.4921	11.4157	426.347	305.5	-0.0671191	0.98246	11.4921	11.612	426.408	439.067	0.0138673	0.999975
C11H1.4	WBGene00004191	chrX	14313650	14326730	4.08837	3.5147	151.743	107.531	-0.0831412	0.98111	4.08837	2.18293	151.723	98.0722	0.685601	0.999975
C11H1.5	WBGene00007530	chrX	14298020	14303070	5.36446	4.09252	208.918	98.4929	-0.671114	0.945973	5.36446	2.94974	209.379	111.592	0.963956	0.999975
C11H1.7	WBGene00007531	chrX	14327547	14330125	1.97437	1.86112	25.4689	17.6692	-0.113765	0.98111	1.97437	2.07951	25.5677	29.4885	-0.149755	0.999975
C11H1.8	WBGene00007532	chrX	14295751	14296586	14.3406	12.7847	117.701	71.0451	-0.314581	0.945973	14.3406	15.0504	117.6	126.145	-0.0451175	0.999975
C11H1.9	WBGene00023500	chrX	14318062	14320328	21.5746	14.1249	592.875	302.055	-0.559181	0.945973	21.5746	16.4016	593.183	463.294	0.412625	0.999975
C12C8.1	WBGene00002026	chrI	9320352	9322503	40.0465	47.5029	1468.75	1559.17	0.499922	0.954286	40.0465	51.1358	1468.12	2034.35	-0.414519	0.999975
C12C8.2	WBGene00007533	chrI	9327848	9330922	16.0375	8.66239	449.04	171.437	-0.975429	0.601979	16.0375	20.5135	449.541	586.082	-0.326574	0.999975
C12C8.3	WBGene00003026	chrI	9335763	9342488	53.9856	39.435	4966.52	2235.09	-0.738168	0.854322	53.9856	47.1846	4975.99	4378.73	0.240545	0.999975
C12D12.1	WBGene00015713	chrX	3499239	3505240	222.883	148.403	12182.7	5149.42	-0.828616	0.927219	222.883	200.31	12213	10216.4	0.313599	0.999975
C12D12.2	WBGene00001620	chrX	3496012	3499156	117.312	130.707	4052.59	3419.84	0.168819	0.959966	117.312	127.435	4053.3	4543.82	-0.108735	0.999975
C12D12.3	WBGene00015714	chrX	3489279	3491142	0.721097	0.631976	5.78031	4.0607	-0.0956854	0.990553	0.721097	0.609654	5.84728	6.87184	-0.176857	0.999975
C12D12.4	WBGene00015715	chrX	3486295	3486825	0	0.0622192	0.204021	0.314792	1.03942	NA	0	0	NA	NA	NA	NA
C12D12.5	WBGene00015716	chrX	3505426	3506352	7.29735	9.00787	130.854	114.039	0.215308	0.95774	7.29735	8.68604	131.473	160.712	-0.233629	0.999975
C12D5.10	WBGene00015711	chrV	7692071	7693469	0.774482	0.262189	13.3616	3.26848	-1.61766	0.874524	0.774482	0.598726	13.475	11.4586	0.28993	0.999975
C12D5.11	WBGene00015712	chrV	7681800	7683938	0.0467381	0.0219256	0.859419	0.491747	-0.391709	NA	0.0467381	0.0352753	0.855872	0.724397	0.296689	0.999975
C12D5.2	WBGene00015705	chrV	7686362	7688140	0.413655	1.03812	9.96992	17.108	1.19275	0.738694	0.413655	0.507503	9.96015	12.4021	-0.260274	0.999975
C12D5.3	WBGene00015706	chrV	7676184	7676944	15.895	19.6736	165.393	160.55	0.370857	0.945973	15.895	22.1057	165.581	235.181	-0.45016	0.999975
C12D5.4	WBGene00015707	chrV	7672069	7673027	2.19742	2.185	18.5947	14.2928	0.0341382	0.993677	2.19742	1.703	18.6637	14.9191	0.379151	0.999975
C12D5.5	WBGene00015708	chrV	7668220	7668967	13.2315	11.3993	125.726	84.5099	-0.159354	0.976137	13.2315	16.7458	126.155	159.022	-0.277949	0.999975
C12D5.7	WBGene00015709	chrV	7679294	7681518	10.7292	8.24664	323.025	183.215	-0.404373	0.949003	10.7292	6.80195	322.202	216.807	0.627631	0.999975
C12D5.8	WBGene00003684	chrV	7684320	7686316	1.26966	1.77487	26.2478	23.6738	0.264829	0.967356	1.26966	1.81207	26.7576	39.2581	-0.496968	0.999975
C12D5.9	WBGene00015710	chrV	7688313	7689957	1.60403	1.76048	29.5607	22.5951	0.0260678	0.993677	1.60403	0.985964	29.5247	19.7707	0.634633	0.999975
C12D8.1	WBGene00007534	chrV	10236132	10238836	62.1234	75.3391	2274.82	1972.22	0.207801	0.945973	62.1234	65.9976	2274.95	2405.2	-0.0242449	0.999975
C12D8.10	WBGene00000102	chrV	10248879	10252870	54.5213	80.4247	2231.26	2006.88	0.260825	0.954286	54.5213	65.6867	2231.88	2856.4	-0.299864	0.999975
C12D8.11	WBGene00004405	chrV	10252796	10255032	37.8426	49.2286	1469.64	1375.54	0.318264	0.924718	37.8426	36.3676	1470.54	1447.87	0.0784929	0.999975
C12D8.12	WBGene00006226	chrV	10231681	10233389	0.0440885	0.098309	0.94053	1.59231	1.17331	NA	0.0440885	0.146112	0.887984	3.5336	-1.93646	0.999975
C12D8.13	WBGene00007540	chrV	10219428	10220444	0.0405988	0.0900413	0.350762	0.627888	1.25375	NA	0.0405988	0.0755548	0.350436	0.732581	-1.00776	0.999975
C12D8.14	WBGene00007541	chrV	10228025	10228379	68.6856	127.134	112.067	186.191	1.14616	0.884591	68.6856	62.2572	112.124	102.565	0.184631	0.999975
C12D8.15	WBGene00007542	chrV	10228690	10229215	1.26965	0.882166	5.47354	2.62724	-0.645195	NA	1.26965	1.19768	5.48462	6.19459	-0.119542	0.999975
C12D8.16	WBGene00007543	chrV	10229785	10230108	16.6603	30.4269	54.1828	89.3015	1.13458	0.832064	16.6603	13.0453	54.1107	45.9462	0.292041	0.999975
C12D8.17	WBGene00007544	chrV	10231241	10231510	34.2463	43.4108	57.7957	79.2095	0.868444	0.945973	34.2463	37.0621	57.763	55.0007	0.126769	0.999975
C12D8.18	WBGene00044174	chrV	10221010	10221391	6.98535	8.9007	8.5641	10.7792	0.745614	0.945973	6.98535	6.84056	8.70898	12.0803	-0.416008	0.999975
C12D8.19	WBGene00044175	chrV	10221635	10221937	19.9588	23.8442	7.50296	3.39225	-0.73148	0.959966	19.9588	20.5568	7.63674	7.71854	0.0407044	0.999975
C12D8.20	WBGene00194780	chrV	10222280	10223495	0.00973863	0	0.328122	0.190932	-0.367436	NA	0.00973863	0.103883	0.328342	1.59401	-2.22331	0.999975
C12D8.21	WBGene00195157	chrV	10240547	10241163	2.72501	3.11501	4.59785	6.96662	1.01324	0.945973	2.72501	2.18979	4.6111	4.83019	-0.0108936	0.999975
C12D8.4	WBGene00007535	chrV	10226858	10227408	0.056187	0.101019	0.350761	0.484036	0.878358	NA	0.056187	0.435743	0.349005	2.21647	-2.61087	0.999975
C12D8.5	WBGene00007536	chrV	10223420	10225696	7.77316	3.60225	202.439	75.3149	-1.01275	0.696821	7.77316	4.77864	203.332	131.844	0.681085	0.999975
C12D8.6	WBGene00007537	chrV	10239620	10240160	19.8379	23.7596	0.204022	0.645318	2.07502	NA	19.8379	20.1887	NA	NA	NA	NA
C12D8.8	WBGene00000721	chrV	10241758	10242693	0	0.113194	0.204022	1.32385	3.11167	NA	0	0.0262216	0.204043	0.502404	-1.2439	0.999975
C12D8.9	WBGene00007538	chrV	10242829	10243153	1.98778	4.18708	4.61566	5.41786	0.64492	0.967469	1.98778	0.454307	4.68857	0.708475	2.78243	0.999975
C13A10.1	WBGene00015728	chrII	1350691	1355645	1.74301	1.72079	53.8619	38.3175	-0.0775265	0.98246	1.74301	2.21955	53.8713	68.6952	-0.294619	0.999975
C13A10.2	WBGene00015729	chrII	1357183	1358014	17.5989	23.3841	107.025	115.912	0.528819	0.945973	17.5989	27.496	106.798	176.415	-0.668005	0.999975
C13A2.1	WBGene00015718	chrV	7289008	7291813	0.687609	0.105797	25.0401	2.52347	-2.89703	0.545182	0.687609	0.264869	25.0789	10.0092	1.38123	0.999975
C13A2.10	WBGene00015726	chrV	7273812	7274888	0.0415953	0.014754	0.758489	0.190933	-1.57632	NA	0.0415953	0.035071	0.767841	0.343167	1.21797	0.999975
C13A2.11	WBGene00015727	chrV	7280856	7281954	0.163786	0.070434	0.350759	0.190932	-0.463682	NA	0.163786	0.107734	0.350433	0.331133	0.137803	0.999975
C13A2.12	WBGene00044547	chrV	7258789	7260139	4.18062	1.62667	81.136	28.2954	-1.10604	0.947937	4.18062	0.951882	81.4142	23.4783	1.85003	0.999975
C13A2.2	WBGene00015719	chrV	7286166	7287381	0.071375	0	0.929828	0.190934	-1.87016	NA	0.071375	0	0.933303	0.331135	1.551	0.999975
C13A2.3	WBGene00015720	chrV	7282335	7284738	1.93626	0.715227	44.9678	13.7876	-1.29179	0.869206	1.93626	1.15635	45.1897	28.5563	0.718263	0.999975
C13A2.4	WBGene00015721	chrV	7279291	7280512	0.687665	0.0272985	12.0323	0.314797	-4.84261	0.391517	0.687665	0.0918024	12.1076	1.52298	3.04701	0.999975
C13A2.5	WBGene00015722	chrV	7275772	7278506	0.278593	0.0452204	8.6813	0.735882	-3.14663	0.696821	0.278593	0.0919839	8.7103	2.61494	1.79202	0.999975
C13A2.6	WBGene00015723	chrV	7269712	7272769	0.330603	0	10.3421	0.190934	-5.34557	0.453118	0.330603	0.104389	10.4566	4.00326	1.44123	0.999975
C13A2.7	WBGene00015724	chrV	7266334	7268788	0.151638	0.02129	3.59854	0.49289	-2.45434	NA	0.151638	0.0782875	3.66578	1.19286	1.67577	0.999975
C13A2.9	WBGene00015725	chrV	7262546	7264028	1.56454	0.0280205	24.5648	0.496639	-5.21451	0.245168	1.56454	0.322715	24.5585	5.48122	2.21973	0.999975
C13B4.1	WBGene00007545	chrII	14470296	14479551	7.5239	7.81507	534.927	358.885	-0.162084	0.976137	7.5239	7.60522	536.14	549.288	0.0211232	0.999975
C13B4.2	WBGene00006856	chrII	14485548	14488615	62.618	53.5771	2306.83	1227.27	-0.496723	0.945973	62.618	59.2234	2311.3	2107.14	0.189495	0.999975
C13B7.1	WBGene00015730	chrV	2435723	2437783	0	0.00614292	NA	NA	NA	NA	0	0	NA	NA	NA	NA
C13B7.2	WBGene00006171	chrV	2431803	2434724	0	0.0063243	NA	NA	NA	NA	0	0.0296817	NA	NA	NA	NA
C13B7.3	WBGene00005137	chrV	2419079	2421582	0.00990267	0	NA	NA	NA	NA	0.00990267	0.0160332	NA	NA	NA	NA
C13B7.4	WBGene00005148	chrV	2423285	2426205	0.0115756	0.09769	NA	NA	NA	NA	0.0115756	0.0581257	NA	NA	NA	NA
C13B7.5	WBGene00006170	chrV	2426477	2428123	0.00825957	0.0206348	NA	NA	NA	NA	0.00825957	0.0248969	NA	NA	NA	NA
C13B7.6	WBGene00015731	chrV	2421865	2422894	15.2542	13.1813	NA	NA	NA	NA	15.2542	15.8718	NA	NA	NA	NA
C13B9.2	WBGene00015733	chrIII	6620213	6622156	1.64783	2.91208	51.3958	56.4982	0.550288	0.952509	1.64783	2.42172	51.347	74.524	-0.481351	0.999975
C13B9.3	WBGene00015734	chrIII	6622601	6624919	73.1895	51.4326	2718.68	1311.68	-0.637753	0.495858	73.1895	60.5809	2721.46	2263.72	0.321759	0.999975
C13B9.4	WBGene00015735	chrIII	6632787	6652030	12.7216	11.1785	517.126	372.618	-0.0590855	0.989474	12.7216	12.4434	516.661	574.421	-0.0968149	0.999975
C13C12.1	WBGene00000285	chrV	12514856	12515667	17.4277	12.9964	197.153	110.178	-0.425738	0.945973	17.4277	16.5451	196.686	195.664	0.0635941	0.999975
C13C12.2	WBGene00007552	chrV	12523627	12525637	9.48546	6.11665	251.556	118.953	-0.666754	0.807882	9.48546	6.89562	251.296	184.554	0.50142	0.999975
C13C4.1	WBGene00007546	chrV	12101749	12106488	1.75559	1.00865	102.512	42.7337	-0.848617	0.945973	1.75559	1.66864	102.435	98.8781	0.107058	0.999975
C13C4.2	WBGene00007547	chrV	12101266	12103267	6.13885	3.76489	35.818	17.0087	-0.660673	0.945973	6.13885	6.60232	35.8647	28.8786	0.368638	0.999975
C13C4.3	WBGene00003726	chrV	12107122	12109118	3.93011	3.75639	109.634	73.9081	-0.15516	0.98111	3.93011	3.88966	109.455	112.629	0.0148347	0.999975
C13C4.4	WBGene00007548	chrV	12109145	12110959	2.0965	2.55542	37.599	31.9633	0.179458	0.959966	2.0965	2.40197	37.7466	45.1112	-0.201062	0.999975
C13C4.5	WBGene00007549	chrV	12114971	12117542	8.81552	8.00844	306.959	205.997	-0.161684	0.958598	8.81552	6.46976	307.018	231.57	0.462949	0.999975
C13C4.6	WBGene00007550	chrV	12121649	12125077	0.795141	0.862143	25.0901	18.3399	-0.038396	0.992773	0.795141	0.63598	25.2393	20.0324	0.38941	0.999975
C13C4.7	WBGene00007551	chrV	12118972	12120795	4.98605	5.35416	67.7419	55.9378	0.137509	0.976137	4.98605	6.36536	67.5644	92.2614	-0.393388	0.999975
C13C4.8	WBGene00195250	chrV	12117998	12118968	0	0	NA	NA	NA	NA	0	0.0237417	0.204043	0.45836	-1.11154	0.999975
C13D9.1	WBGene00005657	chrV	5012978	5015197	1.79568	1.69218	49.1582	30.5636	-0.271882	0.958598	1.79568	2.21258	49.1963	63.4086	-0.310054	0.999975
C13D9.2	WBGene00005656	chrV	5007213	5011713	0.0606993	0.0476673	1.2662	0.727471	-0.385808	NA	0.0606993	0.0778235	1.2678	1.5104	-0.196536	0.999975
C13D9.3	WBGene00005659	chrV	5001476	5003399	0	0.0327628	0.204022	0.770846	2.33145	NA	0	0	NA	NA	NA	NA
C13D9.4	WBGene00015736	chrV	4977919	4979146	0.00847945	0	0.328122	0.190932	-0.367436	NA	0.00847945	0.0100501	0.32834	0.458361	-0.425221	0.999975
C13D9.5	WBGene00015737	chrV	4979932	4980959	0	0	0.328122	0.190932	-0.367436	NA	0	0.0118002	0.328339	0.331133	0.0438514	0.999975
C13D9.6	WBGene00015738	chrV	4981794	4983177	0	0	NA	NA	NA	NA	0	0	NA	NA	NA	NA
C13D9.7	WBGene00003573	chrV	4983734	4987183	1.81873	1.34725	80.4232	43.6319	-0.468496	0.945973	1.81873	1.47887	80.284	65.9659	0.339465	0.999975
C13D9.8	WBGene00003574	chrV	4991489	4995049	0.0766122	0.064738	3.15966	1.70164	-0.479106	NA	0.0766122	0.0803645	3.09212	3.34574	-0.0576523	0.999975
C13D9.9	WBGene00015739	chrV	4997007	5000553	2.50739	1.61755	70.3768	35.9636	-0.554828	0.945973	2.50739	1.88426	70.3708	56.2774	0.378495	0.999975
C13E3.1	WBGene00015740	chrX	8893075	8898464	3.06843	3.50995	183.069	153.861	0.162976	0.975937	3.06843	2.93696	182.89	182.309	0.0606719	0.999975
C13F10.1	WBGene00015741	chrV	7223835	7225050	4.0327	2.80984	50.1991	25.1964	-0.580706	0.945973	4.0327	3.92355	50.1604	54.3492	-0.0596362	0.999975
C13F10.2	WBGene00015742	chrV	7221460	7222039	5.79504	5.83486	32.6148	23.9835	-0.0297499	0.992577	5.79504	7.30007	32.5682	40.3504	-0.253045	0.999975
C13F10.4	WBGene00015743	chrV	7205602	7214885	14.1264	12.5709	1977.52	1203.91	-0.302238	0.945973	14.1264	12.2956	1978.74	1777.35	0.210926	0.999975
C13F10.5	WBGene00015744	chrV	7214998	7219022	10.888	15.9276	120.962	110.814	0.287318	0.958598	10.888	13.6007	121.289	148.389	-0.234863	0.999975
C13F10.6	WBGene00015745	chrV	7219103	7221023	9.54153	8.10339	351.093	164.254	-0.682189	0.951901	9.54153	10.4331	352.036	358.616	0.0293562	NA
C13F10.7	WBGene00015746	chrV	7222030	7223261	25.1401	24.2436	483.382	243.649	-0.574624	NA	25.1401	23.6347	485.012	406.816	0.309718	NA
C13G3.1	WBGene00007553	chrV	11011424	11012444	38.7361	31.964	572.115	321.272	-0.418775	0.945973	38.7361	54.1633	573.378	780.629	-0.389074	0.999975
C13G3.2	WBGene00001991	chrV	11021042	11022855	2.96645	2.48476	32.454	17.8446	-0.449176	0.952509	2.96645	2.52569	32.7578	27.9394	0.285615	0.999975
C13G3.3	WBGene00007554	chrV	11027152	11030827	47.2232	43.8247	2071.37	1195.15	-0.379653	0.948602	47.2232	52.2208	2075.12	2229.31	-0.0473268	0.999975
C13G5.1	WBGene00000439	chrIII	8622577	8625920	14.7473	17.5593	112.459	101.591	0.26711	0.953771	14.7473	14.1745	112.6	117.299	-0.00291493	0.999975
C13G5.2	WBGene00015747	chrIII	8616697	8618359	5.38261	8.08277	135.269	115.639	0.187531	NA	5.38261	6.31093	135.725	152.082	-0.108089	NA
C14A11.2	WBGene00015748	chrX	2803103	2804822	3.62145	10.2957	65.4392	140.276	1.51378	0.339422	3.62145	4.09628	65.4061	75.8879	-0.15837	0.999975
C14A11.3	WBGene00006496	chrX	2785592	2799243	17.0607	18.3491	749.83	503.467	-0.16093	0.956137	17.0607	18.0751	750.1	793.84	-0.0256913	0.999975
C14A11.5	WBGene00015750	chrX	2805066	2807520	0.718741	0.697874	19.7341	15.3412	0.0504575	0.990966	0.718741	0.814872	20.0111	23.3774	-0.168239	0.999975
C14A11.6	WBGene00015751	chrX	2810475	2814117	0.849825	0.775467	27.4497	17.2064	-0.260111	0.958598	0.849825	0.874434	27.2535	28.1479	0.0094929	0.999975
C14A11.7	WBGene00006055	chrX	2823281	2826819	4.03302	5.68229	87.6313	97.7887	0.571956	0.945973	4.03302	4.65201	87.5403	106.088	-0.221171	0.999975
C14A11.9	WBGene00050944	chrX	2807900	2809623	35.7128	29.6033	579.776	322.009	-0.434662	0.945973	35.7128	37.1336	581.055	587.909	0.0391571	0.999975
C14A4.1	WBGene00007555	chrII	10579893	10580985	25.6397	48.8174	346.023	456.002	0.811907	0.398715	25.6397	36.7318	346.042	492.99	-0.45454	0.999975
C14A4.10	WBGene00006397	chrII	10604969	10605555	52.7829	59.7369	274.182	229.014	0.154038	0.958598	52.7829	42.697	274.934	227.469	0.329488	0.999975
C14A4.11	WBGene00007561	chrII	10605658	10607566	46.8976	44.1742	888.054	457.737	-0.542395	NA	46.8976	53.551	890.305	878.173	0.075869	NA
C14A4.12	WBGene00007562	chrII	10612960	10618276	8.60904	9.41573	368.98	299.678	0.113603	0.976137	8.60904	9.92995	368.639	456.576	-0.252572	0.999975
C14A4.13	WBGene00007563	chrII	10618411	10620445	0.523301	0.862812	15.9337	16.8023	0.490313	0.956137	0.523301	0.412739	15.8956	11.8057	0.485226	0.999975
C14A4.14	WBGene00007564	chrII	10582556	10584177	45.6253	30.8417	1117.99	544.546	-0.624046	0.55889	45.6253	40.8052	1118.74	998.608	0.219964	0.999975
C14A4.15	WBGene00005713	chrII	10600426	10602217	0.395221	0.129464	6.48385	1.61882	-1.58818	NA	0.395221	0.3664	6.60878	6.62126	0.0533518	0.999975
C14A4.2	WBGene00000933	chrII	10581071	10582460	40.4359	32.2826	871.089	525.645	-0.314998	0.945973	40.4359	44.879	870.496	999.838	-0.143783	0.999975
C14A4.3	WBGene00007556	chrII	10584284	10587874	15.2577	10.6531	635.476	287.116	-0.732471	0.939074	15.2577	15.9424	635.947	670.198	-0.0196066	0.999975
C14A4.4	WBGene00000796	chrII	10587982	10592594	17.0393	15.7754	987.931	569.376	-0.381294	0.951901	17.0393	19.2504	990.075	1050.34	-0.029173	0.999975
C14A4.5	WBGene00000798	chrII	10592690	10593471	7.59234	8.64242	83.7787	67.6813	0.105909	0.976137	7.59234	8.33071	83.8407	90.6372	-0.056378	0.999975
C14A4.6	WBGene00007557	chrII	10593222	10594719	11.683	6.47359	102.27	40.8304	-0.910939	0.858924	11.683	12.1912	102.373	110.495	-0.0540802	0.999975
C14A4.7	WBGene00007558	chrII	10595202	10596503	4.07375	2.1188	43.6712	18.3063	-0.840607	0.885785	4.07375	4.15375	44.1597	45.1878	0.0228721	0.999975
C14A4.8	WBGene00007559	chrII	10597073	10598041	0.263794	0.426132	2.96139	4.20251	0.918711	NA	0.263794	0.243982	3.00837	3.24673	-0.0539299	0.999975
C14A4.9	WBGene00007560	chrII	10599270	10600470	85.8672	75.8346	482.865	309.598	-0.227492	0.959966	85.8672	67.8955	482.681	389.614	0.365099	0.999975
C14A6.1	WBGene00007565	chrV	18157998	18159582	51.4851	85.4738	980.098	1069.96	0.54029	0.945973	51.4851	42.7085	981.671	772.736	0.401337	0.999975
C14A6.12	WBGene00050955	chrV	18162005	18162640	0	0	NA	NA	NA	NA	0	0.068679	0.204043	0.588799	-1.47283	0.999975
C14A6.13	WBGene00050956	chrV	18159624	18161311	0.666503	0.804105	11.226	6.94019	-0.280058	0.989836	0.666503	0.150168	11.1731	2.2438	2.37209	0.999975
C14A6.2	WBGene00007566	chrV	18148782	18154368	0.0186808	0.606089	0.329863	3.85461	3.96038	NA	0.0186808	0.0246069	0.328566	0.765843	-1.16479	0.999975
C14A6.3	WBGene00007567	chrV	18146370	18148721	0.0457639	0.0406888	1.31977	1.00963	0.0272685	NA	0.0457639	0.0245466	1.31501	0.906251	0.593161	0.999975
C14A6.5	WBGene00007569	chrV	18163463	18164800	0.0965628	0.200881	0.630843	0.895061	0.918441	NA	0.0965628	0.0605197	0.62508	0.343275	0.920751	0.999975
C14A6.6	WBGene00007570	chrV	18165265	18167203	0.309527	0.987295	5.71658	7.44302	0.79447	0.966112	0.309527	0.282141	5.74146	6.12801	-0.0379257	0.999975
C14A6.7	WBGene00007571	chrV	18167605	18168422	0.109131	0.136469	0.35076	0.314793	0.257655	NA	0.109131	0.123342	0.350434	0.343884	0.083295	0.999975
C14A6.8	WBGene00007572	chrV	18169058	18171590	0.123149	0	0.520761	0.618639	0.66221	NA	0.123149	0	0.52246	0.20377	1.41445	0.999975
C14B1.1	WBGene00003962	chrIII	3699700	3701458	216.32	197.37	6376.35	4289.76	-0.158098	0.949003	216.32	180.839	6379.59	5497.03	0.270887	0.999975
C14B1.10	WBGene00007581	chrIII	3709311	3713334	10.6406	12.624	418.386	350.102	0.156676	0.954286	10.6406	10.8258	418.522	433.783	0.00440499	0.999975
C14B1.12	WBGene00184990	chrIII	3724202	3724962	7.19242	11.19	66.8359	56.5354	0.172265	NA	7.19242	6.57491	67.1775	57.8323	0.272178	NA
C14B1.2	WBGene00007573	chrIII	3702263	3703154	11.078	12.9556	164.748	105.262	-0.232543	NA	11.078	10.8394	165.413	150.504	0.192344	NA
C14B1.3	WBGene00007574	chrIII	3703629	3705036	13.5831	18.0922	310.392	309.86	0.41126	0.898891	13.5831	13.0896	310.931	311.256	0.0545704	0.999975
C14B1.4	WBGene00006474	chrIII	3705246	3706767	36.9427	36.7064	1021.85	660.293	-0.216273	0.959966	36.9427	39.4466	1024.05	1064.65	-2.02e-05	0.999975
C14B1.5	WBGene00007576	chrIII	3706865	3709204	10.2402	14.4168	236.347	237.828	0.422742	0.927219	10.2402	11.0373	236.39	262.121	-0.092989	0.999975
C14B1.6	WBGene00007577	chrIII	3713442	3718729	5.7866	7.52459	319.75	268.572	0.162103	0.972136	5.7866	6.49789	319.928	356.23	-0.0989872	0.999975
C14B1.7	WBGene00007578	chrIII	3719885	3723579	7.12627	4.66387	657.527	222.406	-1.15012	NA	7.12627	6.77761	660.354	572.685	0.261572	NA
C14B1.8	WBGene00007579	chrIII	3718715	3719655	14.9378	14.7147	183.528	121.046	-0.186713	0.960854	14.9378	14.5702	183.952	185.5	0.0439823	0.999975
C14B1.9	WBGene00007580	chrIII	3725055	3726484	13.2878	10.4207	431.334	167.745	-0.948798	NA	13.2878	15.0243	433.271	444.944	0.0177213	NA
C14B4.2	WBGene00007583	chrV	19332695	19349458	5.75357	5.06499	613.192	390.523	-0.237198	0.958598	5.75357	3.96067	613.399	434.722	0.552808	0.999975
C14B9.1	WBGene00002011	chrIII	8138023	8139565	448.511	587.888	2701.37	2866.61	0.499385	0.945973	448.511	629.519	2698.09	3911.9	-0.479856	0.999975
C14B9.10	WBGene00015755	chrIII	8130795	8132376	831.99	1025.36	2501.2	2406.27	0.357916	0.945973	831.99	819.618	2498.37	2517.42	0.0451208	0.999975
C14B9.2	WBGene00015752	chrIII	8133598	8136583	102.171	82.3978	4100.11	2437.08	-0.336771	0.945973	102.171	96.8413	4098.01	3984.89	0.0964601	0.999975
C14B9.3	WBGene00015753	chrIII	8108723	8111198	4.90993	5.41094	97.4548	80.8411	0.14409	0.978619	4.90993	4.78134	97.2265	102.22	-0.0161782	0.999975
C14B9.4	WBGene00004042	chrIII	8101280	8104010	71.0201	33.8274	4157.31	1071.82	-1.54185	NA	71.0201	60.0999	4172.69	3222.29	0.428967	NA
C14B9.6	WBGene00001565	chrIII	8111099	8125409	16.4864	16.3243	2080.64	1374.03	-0.184887	0.958598	16.4864	16.4886	2082.38	2125.66	0.0263974	0.999975
C14B9.7	WBGene00004433	chrIII	8129483	8130397	4904.37	6522.06	33892	33441.3	0.394423	0.915652	4904.37	5620.3	33916	39503.5	-0.163941	0.999975
C14B9.8	WBGene00015754	chrIII	8139544	8144565	12.5865	11.9818	1030.09	682.287	-0.180589	0.954286	12.5865	11.3442	1029.49	964.346	0.150383	0.999975
C14C10.1	WBGene00007584	chrV	12588408	12589602	0.615867	1.51442	15.427	18.1261	0.646347	NA	0.615867	0.559202	15.5466	13.3517	0.275648	NA
C14C10.2	WBGene00007585	chrV	12590959	12592463	4.37343	4.43306	83.6528	54.2677	-0.210587	0.967976	4.37343	4.73656	83.5074	91.2298	-0.0715266	0.999975
C14C10.3	WBGene00007586	chrV	12596370	12599135	42.7413	53.2904	1880.08	1652.2	0.227328	0.947937	42.7413	48.3811	1878.77	2194.14	-0.16779	0.999975
C14C10.4	WBGene00007587	chrV	12592546	12596280	33.1651	23.7474	2332.72	1117.01	-0.648634	0.738694	33.1651	31.8037	2333.58	2271.63	0.0948923	0.999975
C14C10.5	WBGene00007588	chrV	12600267	12607287	47.6786	35.6079	6945.6	3140.83	-0.731219	0.945973	47.6786	42.3852	6959.09	5975.95	0.275805	0.999975
C14C10.6	WBGene00007589	chrV	12607392	12608090	6.66436	7.76882	71.2164	48.8932	-0.128842	0.984805	6.66436	7.77258	71.1056	77.4456	-0.0671466	0.999975
C14C10.7	WBGene00007590	chrV	12589692	12590637	13.9898	29.3134	65.1745	103.903	1.08659	0.658662	13.9898	21.1693	65.2275	103.984	-0.616732	0.999975
C14C11.1	WBGene00015765	chrV	5663583	5665247	0.272047	0.951418	3.53449	7.54657	1.50805	0.945973	0.272047	0.494001	3.40247	6.33338	-0.84032	0.999975
C14C11.2	WBGene00015766	chrV	5660911	5663480	4.71001	2.67327	180.353	48.0642	-1.49405	NA	4.71001	5.95853	181.18	230.074	-0.288597	NA
C14C11.3	WBGene00015767	chrV	5654430	5658671	19.5235	18.2196	694.012	482.968	-0.109298	0.977519	19.5235	15.4232	693.676	580.242	0.313682	0.999975
C14C11.4	WBGene00015768	chrV	5647547	5651027	4.83325	4.29926	161.885	107.389	-0.178389	0.958598	4.83325	3.57553	162.248	124.715	0.435647	0.999975
C14C11.5	WBGene00006008	chrV	5644470	5646215	0.349896	0.180432	6.24716	2.04524	-1.1972	NA	0.349896	0.560747	6.22139	9.57848	-0.566485	0.999975
C14C11.6	WBGene00003507	chrV	5658690	5660690	4.94459	4.10034	163.694	79.2997	-0.631883	0.947937	4.94459	4.90639	164.273	157.345	0.118235	NA
C14C11.7	WBGene00015769	chrV	5665222	5666447	35.6621	30.6351	549.054	305.737	-0.430922	0.945973	35.6621	43.888	550.219	646.034	-0.175531	0.999975
C14C11.8	WBGene00004104	chrV	5669594	5676071	32.9127	23.9687	1442.11	763.125	-0.504458	0.922266	32.9127	22.0145	1443.35	997.778	0.588708	0.999975
C14C6.1	WBGene00005898	chrV	560195	562957	0.0111325	0	0.328122	0.190932	-0.367436	NA	0.0111325	0.0166491	0.328441	0.606253	-0.828212	0.999975
C14C6.10	WBGene00005585	chrV	564391	566085	0.0731945	0.0876022	1.09027	0.907586	0.149157	NA	0.0731945	0.177045	1.08904	2.87311	-1.34349	0.999975
C14C6.12	WBGene00015763	chrV	570571	571178	0.638149	0.743784	4.75285	4.66599	0.387126	0.977519	0.638149	0.364289	4.75191	2.94472	0.746453	0.999975
C14C6.13	WBGene00015764	chrV	572031	574740	0	0.0147118	0.204021	0.314792	1.03942	NA	0	0	0.204042	0.331132	-0.642465	0.999975
C14C6.2	WBGene00015756	chrV	563135	564383	81.8194	130.915	899.311	1129.14	0.742065	0.945973	81.8194	76.0052	900.7	812.43	0.204878	0.999975
C14C6.3	WBGene00015757	chrV	543469	545360	0.218056	0.235456	4.13592	2.93415	-0.0815292	NA	0.218056	0.735601	4.14121	15.1096	-1.81126	0.999975
C14C6.4	WBGene00015758	chrV	539202	541487	0.607384	0.491689	15.0886	8.47229	-0.418896	0.957633	0.607384	3.02804	15.1858	72.5383	-2.19994	0.00589873
C14C6.5	WBGene00015759	chrV	536628	537419	286.49	623.544	2145.72	4066.68	1.33613	0.842596	286.49	318.911	2147.58	2394.77	-0.1011	0.999975
C14C6.6	WBGene00015760	chrV	545844	548081	0.474264	0.231463	16.509	5.52985	-1.1642	0.945973	0.474264	0.673087	16.4799	21.4878	-0.326738	0.999975
C14C6.7	WBGene00015761	chrV	548702	550654	0.02847	0.0095729	1.00959	0.314796	-1.26755	NA	0.02847	0.183126	1.01836	5.44755	-2.36328	0.999975
C14C6.8	WBGene00015762	chrV	551279	552979	0.187541	0.111974	4.89736	2.01891	-0.864696	NA	0.187541	0.408349	4.86691	11.9749	-1.24286	0.999975
C14C6.9	WBGene00005899	chrV	554374	556156	0	0.0144635	0.35076	0.314793	0.257655	NA	0	0.0650838	0.343791	1.38707	-1.95637	0.999975
C14E2.1	WBGene00015770	chrX	1826459	1827348	0.189422	0.132789	0.774369	0.653753	0.16946	NA	0.189422	0.0801063	0.774113	0.74461	0.112134	0.999975
C14E2.2	WBGene00015771	chrX	1806748	1809537	0	0.010612	0.204021	0.314792	1.03942	NA	0	0.00818298	0.204042	0.331132	-0.642465	0.999975
C14E2.3	WBGene00015772	chrX	1810679	1811530	0.042953	0	0.350759	0.190932	-0.463682	NA	0.042953	0.088311	0.349211	1.01104	-1.47759	0.999975
C14E2.4	WBGene00015773	chrX	1818858	1821318	0	0.0141063	0.703312	0.314795	-0.746019	NA	0	0.103593	0.694275	1.57771	-1.12818	0.999975
C14E2.5	WBGene00015774	chrX	1823609	1825334	0.0302912	0.0525583	1.2406	0.655172	-0.507361	NA	0.0302912	0.128624	1.2152	1.92115	-0.604707	0.999975
C14E2.6	WBGene00015775	chrX	1827731	1828481	0.217812	0.230238	2.6906	1.59945	-0.33662	NA	0.217812	0.287888	2.69345	2.59773	0.108279	0.999975
C14E2.7	WBGene00044562	chrX	1816354	1816756	1.80442	2.32508	7.04521	8.26187	0.643561	0.954286	1.80442	2.91811	7.0809	12.7991	-0.797966	0.999975
C14F11.1	WBGene00015778	chrX	6240918	6242690	287.874	357.202	7152.67	6661.39	0.311076	0.945973	287.874	302.88	7150.49	7516.69	-0.015979	0.999975
C14F11.2	WBGene00015779	chrX	6208730	6213876	19.0553	20.711	714.817	582.171	0.117603	0.976137	19.0553	19.9354	715.279	767.365	-0.045332	0.999975
C14F11.3	WBGene00001803	chrX	6226095	6230665	6.02006	7.54016	155.618	147.582	0.337244	0.946737	6.02006	8.21008	155.535	223.417	-0.46642	0.999975
C14F11.4	WBGene00015780	chrX	6230882	6233012	6.53361	6.96861	230.367	121.04	-0.514718	NA	6.53361	4.90867	231.442	157.884	0.607867	NA
C14F11.5	WBGene00002024	chrX	6233112	6235505	64.6344	87.7204	1632.19	1604.88	0.389387	0.945973	64.6344	78.4333	1632.96	1967.29	-0.212649	0.999975
C14F11.6	WBGene00015781	chrX	6237984	6239051	62.0722	45.9564	624.425	344.256	-0.445311	0.945973	62.0722	44.6173	624.331	454.567	0.513893	0.999975
C14F11.7	WBGene00015782	chrX	6208125	6208528	0.82262	1.47191	2.71254	3.13516	0.622631	NA	0.82262	0.98273	2.76969	3.25832	-0.178331	0.999975
C14F5.1	WBGene00015776	chrX	7954306	7956143	62.6405	151.326	1003.82	1561.42	1.05108	0.38003	62.6405	80.4116	1001.6	1290.77	-0.309859	0.999975
C14F5.2	WBGene00006980	chrX	7930689	7931760	4.01614	6.30109	72.896	74.3182	0.441611	0.945973	4.01614	4.29314	72.8674	73.5594	0.0424389	0.999975
C14F5.3	WBGene00006588	chrX	7937518	7945000	71.251	74.8957	3627.58	2664.07	-0.0316449	0.990966	71.251	75.2245	3626.19	3630.22	0.0544701	0.999975
C14F5.4	WBGene00015777	chrX	7956146	7958261	9.88387	9.33395	186.408	130.159	-0.104454	0.98246	9.88387	7.08104	186.516	139.135	0.478892	0.999975
C14F5.5	WBGene00004774	chrX	7959778	7961677	22.303	15.4787	490.385	216.116	-0.768374	0.892788	22.303	22.226	491.271	470.578	0.11816	0.999975
C14H10.1	WBGene00007591	chrX	10233684	10236886	62.0242	64.3	1372.61	1099.5	0.0936574	0.975937	62.0242	73.4733	1371.29	1686.18	-0.242155	0.999975
C14H10.2	WBGene00007592	chrX	10242266	10251295	30.979	25.2983	1188.9	688.644	-0.374068	0.898891	30.979	24.7679	1189.12	946.377	0.385478	0.999975
C14H10.3	WBGene00007593	chrX	10220579	10228076	24.6116	19.541	1311.63	787.461	-0.322342	0.945973	24.6116	18.497	1311.35	1071.53	0.34746	0.999975
C14H10.4	WBGene00006135	chrX	10239302	10240979	0.0359505	0	0.710666	0.314795	-0.761025	NA	0.0359505	0.019687	0.717447	0.506104	0.559512	0.999975
C15A11.1	WBGene00000612	chrI	7385867	7387106	1.32697	0.297785	30.5764	6.10846	-1.9098	0.945973	1.32697	0.215775	30.7112	5.13258	2.63708	0.999975
C15A11.2	WBGene00007597	chrI	7384394	7388792	1.85736	2.96414	21.9096	21.2857	0.37206	0.959966	1.85736	1.97126	21.8613	22.139	0.037859	0.999975
C15A11.3	WBGene00004944	chrI	7389042	7395915	4.2693	3.64017	145.806	89.0951	-0.296897	0.958598	4.2693	4.74798	145.675	169.399	-0.1616	0.999975
C15A11.4	WBGene00007598	chrI	7398820	7401020	1.14695	0.361547	31.27	7.3481	-1.6756	0.349568	1.14695	0.404173	31.3559	11.2154	1.53933	0.999975
C15A11.5	WBGene00000596	chrI	7401671	7402753	2.11466	10.6507	3.67991	13.7974	2.32039	NA	2.11466	2.08924	3.72248	4.97455	-0.362227	0.999975
C15A11.6	WBGene00000638	chrI	7403337	7404349	2.88425	13.2113	15.2862	36.3882	1.66498	NA	2.88425	2.56575	15.1165	10.9467	0.521697	0.999975
C15A11.7	WBGene00007599	chrI	7405026	7408508	11.7714	13.0377	325.808	272.572	0.156354	0.977621	11.7714	12.4561	325.413	362.649	-0.100225	0.999975
C15A7.1	WBGene00007594	chrX	12065195	12067364	0.621339	0.421069	13.4483	7.2921	-0.469285	0.954286	0.621339	0.364032	13.4124	8.7168	0.677774	0.999975
C15A7.2	WBGene00007595	chrX	12070674	12073795	0.423538	0.680831	12.7182	15.7458	0.721808	0.945973	0.423538	0.545606	12.692	17.4392	-0.402339	0.999975
C15A7.4	WBGene00045385	chrX	12068481	12070495	0.0205218	0.0622192	0.559524	0.8957	1.09255	NA	0.0205218	0.0745726	0.582793	1.77877	-1.55375	0.999975
C15B12.1	WBGene00015783	chrX	6476775	6479048	3.48303	4.84868	75.3238	76.2573	0.431505	0.945973	3.48303	3.07756	75.1584	68.2795	0.194556	0.999975
C15B12.2	WBGene00015784	chrX	6461946	6465396	0.254104	0.0963898	4.10265	0.969674	-1.66725	NA	0.254104	0.407954	3.99007	6.61977	-0.674292	0.999975
C15B12.3	WBGene00015785	chrX	6467246	6467525	0	0	NA	NA	NA	NA	0	0.0972743	0.204042	0.331132	-0.642465	0.999975
C15B12.4	WBGene00015786	chrX	6470328	6473711	3.86919	3.90553	129.422	98.7973	0.0241992	0.993677	3.86919	3.73235	129.159	130.391	0.0423794	0.999975
C15B12.5	WBGene00001517	chrX	6479600	6484773	1.89838	2.40583	81.6306	74.3289	0.278549	0.958598	1.89838	2.32473	81.4313	99.0408	-0.226364	0.999975
C15B12.6	WBGene00015787	chrX	6497882	6499799	3.11686	2.96636	59.0324	38.6164	-0.198557	0.958598	3.11686	4.28634	59.3026	77.7258	-0.334223	0.999975
C15B12.7	WBGene00000393	chrX	6499871	6504576	15.2355	13.4506	629.843	353.201	-0.42077	0.940189	15.2355	20.5081	630.438	845.23	-0.366915	0.999975
C15B12.8	WBGene00015788	chrX	6474236	6476743	0.748514	1.08443	19.1793	21.7959	0.598239	0.945973	0.748514	1.06326	19.3028	29.0426	-0.533292	0.999975
C15B12.9	WBGene00044573	chrX	6468761	6469766	0.054317	0.153022	0.717742	1.76923	1.71532	NA	0.054317	0.0435552	0.718621	0.537924	0.473904	0.999975
C15C6.1	WBGene00007600	chrI	12202220	12203708	30.9912	23.6971	402.51	231.147	-0.386479	0.945973	30.9912	23.8732	402.031	316.837	0.399639	0.999975
C15C6.2	WBGene00007601	chrI	12203790	12205800	2.79738	7.74927	58.1368	88.2164	1.01533	NA	2.79738	2.76134	58.3029	56.605	0.0987142	NA
C15C6.3	WBGene00007602	chrI	12207085	12212197	22.6927	22.1939	1026.74	666.08	-0.210574	0.954286	22.6927	23.5872	1027.58	1078.07	-0.0131205	0.999975
C15C6.4	WBGene00007603	chrI	12213099	12215175	5.60974	8.64308	64.373	68.4802	0.502965	0.945973	5.60974	9.63136	64.355	111.751	-0.740089	0.999975
C15C7.1	WBGene00015789	chrX	3164512	3165646	10.2842	11.023	83.2396	60.9995	-0.0347373	0.990719	10.2842	10.3458	83.3027	83.3153	0.0558558	0.999975
C15C7.2	WBGene00002220	chrX	3159927	3164419	5.72769	6.12772	216.036	172.031	0.0851324	0.978373	5.72769	5.10741	216.079	202.684	0.148401	0.999975
C15C7.4	WBGene00015790	chrX	3146562	3147078	45.6643	62.3901	273.592	298.531	0.539588	0.945973	45.6643	55.6743	273.269	332.323	-0.226189	0.999975
C15C7.5	WBGene00015791	chrX	3151134	3152453	306.906	222.308	3153.23	1184.69	-0.998589	0.579451	306.906	308.891	3156.75	3124.23	0.0710118	0.999975
C15C7.6	WBGene00015792	chrX	3167559	3170498	0.293575	0.363153	7.50837	6.4515	0.194868	0.977839	0.293575	0.104532	7.57239	2.9248	1.42848	0.999975
C15C7.7	WBGene00015793	chrX	3165785	3167589	9.72943	9.94662	230.268	180.76	0.0645001	0.985519	9.72943	6.8492	230.444	167.704	0.514574	0.999975
C15C8.1	WBGene00007604	chrV	12734165	12736024	16.6936	22.0707	429.901	445.235	0.464296	0.945973	16.6936	20.4334	429.748	549.299	-0.298025	0.999975
C15C8.2	WBGene00000521	chrV	12736685	12741194	3.25191	1.81714	151.8	56.7505	-1.00574	0.206185	3.25191	2.5191	151.81	114.169	0.467165	0.999975
C15C8.3	WBGene00007605	chrV	12742021	12744153	68.0519	99.5097	1608.12	1709.41	0.501853	0.945973	68.0519	51.9535	1609.17	1298.87	0.365142	0.999975
C15C8.4	WBGene00007606	chrV	12745182	12747447	18.9003	12.7168	460.28	191.993	-0.847724	0.841192	18.9003	15.4779	460.775	396.376	0.273267	0.999975
C15C8.5	WBGene00007607	chrV	12748274	12749946	1.07174	1.2959	18.4962	16.7575	0.271315	0.959966	1.07174	1.39928	18.5493	24.613	-0.351982	0.999975
C15C8.6	WBGene00007608	chrV	12750012	12751528	0.888141	0.811728	14.657	9.18124	-0.261091	0.965065	0.888141	1.1631	14.371	20.5467	-0.459674	0.999975
C15C8.7	WBGene00007609	chrV	12744142	12745033	45.2381	54.44	333.77	251.665	0.00638338	0.998161	45.2381	65.5517	334.596	479.851	-0.464092	0.999975
C15C8.8	WBGene00045460	chrV	12751585	12752490	1.30673	1.16088	13.1628	7.23117	-0.450432	0.958598	1.30673	0.879772	13.0184	8.29824	0.705744	0.999975
C15F1.1	WBGene00015794	chrII	6988735	6991644	17.1872	14.693	390.421	238.24	-0.298884	0.949744	17.1872	15.4576	390.03	347.317	0.223406	0.999975
C15F1.2	WBGene00015795	chrII	6979908	6988587	9.80057	5.12996	487.299	186.397	-0.972692	0.739391	9.80057	7.45404	486.752	383.02	0.401843	0.999975
C15F1.3	WBGene00006605	chrII	6955363	6965645	22.392	16.7361	1136.39	516.307	-0.724422	0.899716	22.392	21.5027	1139.01	1064.36	0.153869	0.999975
C15F1.4	WBGene00004090	chrII	6965757	6967606	11.9462	8.64995	301.399	147.51	-0.617129	0.849442	11.9462	10.7433	301.516	269.999	0.215353	0.999975
C15F1.5	WBGene00015796	chrII	6967861	6970543	0.275375	0.746491	8.19529	12.5703	1.03088	0.945973	0.275375	0.30761	8.16156	7.99598	0.0856452	0.999975
C15F1.6	WBGene00000198	chrII	6970625	6972195	443.931	302.404	9375.29	4384.94	-0.682571	0.885018	443.931	403.197	9388.5	8312.46	0.231694	0.999975
C15F1.7	WBGene00004930	chrII	6972669	6973850	354.812	417.718	3494.47	3085.48	0.234153	0.945973	354.812	226.566	3492	2321.09	0.64533	0.999975
C15F1.8	WBGene00015797	chrII	6976767	6977325	1.22396	1.71316	8.74133	6.7632	0.0435886	0.994263	1.22396	1.3162	8.77239	8.16601	0.159412	0.999975
C15H11.1	WBGene00007613	chrV	14393842	14394449	1.43864	3.27314	7.95165	9.0297	0.597159	0.976137	1.43864	1.48391	7.99413	7.37894	0.171602	0.999975
C15H11.10	WBGene00007618	chrV	14392224	14393546	0	0.0366208	0.204021	0.314792	1.03942	NA	0	0	NA	NA	NA	NA
C15H11.11	WBGene00007619	chrV	14415798	14416131	9.97664	16.1099	26.278	33.2754	0.754338	0.842596	9.97664	8.98342	26.1458	24.7512	0.135157	0.999975
C15H11.13	WBGene00077576	chrV	14395020	14395734	0.155506	0.324103	1.42243	1.50099	0.491289	NA	0.155506	0.0585855	1.42845	0.343887	2.11052	0.999975
C15H11.2	WBGene00007614	chrV	14409062	14411880	1.45605	1.11458	32.6135	21.0246	-0.21966	0.972136	1.45605	1.45038	32.6114	36.0266	-0.0876111	0.999975
C15H11.3	WBGene00003834	chrV	14412389	14415777	60.186	59.748	2598.9	1722.69	-0.179506	0.958598	60.186	63.6335	2600.11	2772.32	-0.0364462	0.999975
C15H11.4	WBGene00000985	chrV	14420036	14422605	53.4334	62.3181	1091.18	953.218	0.218722	0.945973	53.4334	54.5842	1091.12	1092.99	0.053607	0.999975
C15H11.5	WBGene00007615	chrV	14417939	14420066	5.14783	7.41509	192.002	170.4	0.241538	0.968531	5.14783	4.72654	192.837	168.915	0.247152	0.999975
C15H11.6	WBGene00003835	chrV	14416099	14417814	4.52706	9.92833	156.005	190.51	0.702017	0.945973	4.52706	5.1631	156.817	164.845	-0.0159539	NA
C15H11.7	WBGene00003922	chrV	14421439	14422605	209.589	126.768	3863.93	1141.88	-1.34493	NA	209.589	175.301	3876.03	2761.38	0.545266	NA
C15H11.8	WBGene00007616	chrV	14422704	14423346	20.1013	25.8336	117.476	108.838	0.303544	0.945973	20.1013	19.7968	117.668	118.874	0.0413608	0.999975
C15H11.9	WBGene00007617	chrV	14423760	14424995	90.9608	103.549	1680.4	1319.56	0.0649889	0.98111	90.9608	114.092	1681.59	2141.59	-0.29278	0.999975
C15H7.3	WBGene00007610	chrIII	9650336	9651875	0.309248	0.67611	8.98463	9.66415	0.518917	NA	0.309248	0.288974	8.94975	7.46598	0.31759	0.999975
C15H7.4	WBGene00007611	chrIII	9654267	9655775	0.182408	0.367604	4.44812	4.7272	0.501525	0.977519	0.182408	0.135324	4.37957	2.95185	0.625246	0.999975
C15H9.1	WBGene00003778	chrX	6122279	6127506	9.26867	18.827	570.802	872.125	1.02528	0.610054	9.26867	12.359	569.415	784.268	-0.405793	0.999975
C15H9.11	WBGene00015805	chrX	6102845	6103397	109.945	171.546	407.056	509.555	0.737745	0.945973	109.945	137.825	406.976	533.144	-0.333508	0.999975
C15H9.2	WBGene00015798	chrX	6118675	6120401	0.420878	0.519649	7.29545	5.22007	-0.0691929	0.990966	0.420878	0.298312	7.318	6.86656	0.147935	0.999975
C15H9.3	WBGene00015799	chrX	6115768	6118016	0.627868	0.603121	10.7334	7.59346	-0.0855392	0.989836	0.627868	0.757235	10.8444	12.4493	-0.143039	0.999975
C15H9.4	WBGene00015800	chrX	6101179	6105427	29.2757	28.9808	796.145	581.415	-0.0397295	0.989836	29.2757	26.0297	796.437	741.911	0.158389	0.999975
C15H9.5	WBGene00015801	chrX	6093250	6097536	10.4743	11.111	490.2	343.492	-0.0993612	0.974337	10.4743	10.7351	489.669	523.135	-0.0393016	0.999975
C15H9.6	WBGene00002007	chrX	6088979	6092089	655.029	511.822	29109.7	16984.7	-0.363529	0.945973	655.029	559.158	29107.9	25698.7	0.235789	0.999975
C15H9.7	WBGene00015802	chrX	6106881	6109310	24.8766	19.2625	688.471	391.689	-0.399952	0.945973	24.8766	24.9281	689.302	705.924	0.0216978	0.999975
C15H9.8	WBGene00004193	chrX	6110759	6112881	18.4615	20.0151	296.319	224.254	0.0117144	0.996331	18.4615	17.2687	295.385	256.605	0.259121	0.999975
C15H9.9	WBGene00015803	chrX	6127418	6128291	437.395	575.733	2814.95	2854.08	0.433649	0.945973	437.395	532.04	2816.11	3500.17	-0.257647	0.999975
C16A11.1	WBGene00001673	chrII	4247191	4255284	1.35459	0.933642	37.1409	21.1087	-0.401438	0.958598	1.35459	1.70885	37.0525	50.8144	-0.399593	0.999975
C16A11.10	WBGene00185089	chrII	4231385	4234623	2.08791	1.38947	72.2888	20.0723	-1.43483	NA	2.08791	1.34941	72.6148	39.0941	0.949387	NA
C16A11.2	WBGene00015815	chrII	4238175	4244835	9.68811	9.83008	378.848	255.607	-0.153953	0.967976	9.68811	10.425	379.176	402.406	-0.02971	0.999975
C16A11.3	WBGene00015816	chrII	4229588	4230812	2.88994	5.25634	69.626	73.4452	0.490776	NA	2.88994	2.8078	69.8533	65.3662	0.151859	NA
C16A11.4	WBGene00015817	chrII	4227048	4229171	10.2856	17.318	423.974	395.854	0.314728	NA	10.2856	11.6202	425.374	452.806	-0.0340851	NA
C16A11.5	WBGene00015818	chrII	4223316	4226333	1.13344	1.07328	71.2017	32.1268	-0.7344	NA	1.13344	1.17472	71.5194	67.5293	0.138894	NA
C16A11.6	WBGene00015819	chrII	4236503	4237752	2.64805	4.6756	47.926	53.7622	0.579518	NA	2.64805	3.73896	48.131	75.7656	-0.5985	NA
C16A11.7	WBGene00015820	chrII	4255507	4256942	0.316164	1.17223	4.90687	9.82955	1.41606	0.945973	0.316164	0.393491	4.86604	5.60234	-0.147205	0.999975
C16A11.8	WBGene00015821	chrII	4257094	4258784	0.0692538	0.122064	0.689082	0.650049	0.329607	NA	0.0692538	0.254386	0.706829	2.98857	-2.02395	0.999975
C16A11.9	WBGene00045297	chrII	4234952	4235985	0.820768	1.77548	11.9491	19.1828	1.09665	0.889794	0.820768	1.41925	11.9944	22.1974	-0.831956	0.999975
C16A3.1	WBGene00015806	chrIII	6390892	6393790	6.35125	7.63217	315.393	234.372	-0.0146182	0.996419	6.35125	8.09748	316.188	391.742	-0.253048	0.999975
C16A3.10	WBGene00015814	chrIII	6394180	6396129	149.834	138.084	3352.8	2418.52	-0.0575106	0.989836	149.834	141.111	3356.61	3191.94	0.128645	0.999975
C16A3.2	WBGene00015807	chrIII	6389779	6390785	7.46858	7.48731	128.439	74.1053	-0.379702	NA	7.46858	8.84398	128.871	144.001	-0.104083	NA
C16A3.3	WBGene00002850	chrIII	6383498	6389360	17.8135	15.3996	2082.33	1215.38	-0.363058	0.945973	17.8135	16.0964	2084.17	1914.2	0.178802	0.999975
C16A3.4	WBGene00015809	chrIII	6381578	6382971	59.792	91.9636	1336.95	1409.91	0.490389	0.604536	59.792	70.7149	1337.75	1619.57	-0.219734	0.999975
C16A3.5	WBGene00015810	chrIII	6380641	6381929	419.995	540.591	3800.81	3787.96	0.408849	0.945973	419.995	460.724	3801.57	4204.19	-0.0891584	0.999975
C16A3.6	WBGene00015811	chrIII	6379395	6380621	67.536	118.874	1339.34	1697.63	0.755738	0.0975538	67.536	87.0188	1339.19	1765.83	-0.342914	0.999975
C16A3.7	WBGene00007048	chrIII	6375325	6379124	17.7077	22.6517	1417.31	1132.63	0.0902665	0.985519	17.7077	16.8246	1419.28	1329.97	0.149843	0.999975
C16A3.8	WBGene00015813	chrIII	6367988	6374039	13.0989	12.651	1291.62	815.276	-0.250087	0.956599	13.0989	11.9716	1292.78	1170.15	0.199864	0.999975
C16A3.9	WBGene00004482	chrIII	6374040	6374950	2168.95	2894.91	12875.7	13083.1	0.436792	0.945973	2168.95	2138.66	12873.7	13098.3	0.0311224	0.999975
C16B8.1	WBGene00003007	chrX	3958476	3961886	8.98175	10.9379	325.203	304.721	0.319883	0.945973	8.98175	9.04539	325.278	339.867	-0.00721961	0.999975
C16B8.2	WBGene00015822	chrX	3961872	3966302	0.982531	1.12265	45.154	41.6007	0.29549	0.957633	0.982531	0.835246	45.1233	41.5156	0.176292	0.999975
C16B8.3	WBGene00015823	chrX	3968015	3968617	457.388	567.375	4134.73	3845.55	0.309131	0.954286	457.388	475.557	4139.45	4277.73	0.00866609	0.999975
C16B8.4	WBGene00015824	chrX	3970368	3973614	4.26904	4.42031	138.033	105.497	0.0259344	0.990966	4.26904	3.96541	138.18	131.764	0.124667	0.999975
C16C10.1	WBGene00007622	chrIII	4178697	4181414	5.41481	5.80808	163.798	89.6851	-0.45524	0.957525	5.41481	5.88777	164.336	171.312	-0.00390237	0.999975
C16C10.10	WBGene00006448	chrIII	4153574	4154619	11.9425	13.6217	183.515	156.552	0.184474	0.954286	11.9425	13.8103	183.542	221.079	-0.212381	0.999975
C16C10.11	WBGene00007630	chrIII	4152025	4152886	510.324	452.532	5143.47	3486.27	-0.147324	0.961962	510.324	585.068	5141.18	6128.58	-0.19738	0.999975
C16C10.12	WBGene00007631	chrIII	4147354	4151572	0.0810812	0.0535338	4.10567	1.3914	-1.14735	NA	0.0810812	0.0870395	3.95615	4.15588	-0.014983	0.999975
C16C10.13	WBGene00007632	chrIII	4176651	4177552	0.0909695	0.0533426	1.47245	0.528965	-1.06324	NA	0.0909695	0.0319915	1.46573	0.343088	2.15104	0.999975
C16C10.2	WBGene00007623	chrIII	4177505	4178642	18.4643	19.0263	263.766	199.385	0.0100328	0.99613	18.4643	16.0129	264.126	249.047	0.140883	0.999975
C16C10.3	WBGene00007624	chrIII	4172307	4176135	68.2571	27.1691	6819.91	1362.77	-1.90948	NA	68.2571	63.2367	6849.32	5780.76	0.300775	NA
C16C10.4	WBGene00007625	chrIII	4171238	4172154	54.5222	70.6594	490.445	444.683	0.272419	0.947937	54.5222	66.4732	490.72	604.194	-0.244039	0.999975
C16C10.5	WBGene00007626	chrIII	4168770	4171135	10.8836	9.26182	307.371	186.816	-0.304627	0.945973	10.8836	10.5175	307.372	303.536	0.0741936	0.999975
C16C10.6	WBGene00007627	chrIII	4166674	4168741	26.7194	33.3674	632.066	525.485	0.147308	0.972136	26.7194	28.8246	633.014	686.925	-0.061839	0.999975
C16C10.7	WBGene00004381	chrIII	4164245	4166821	22.4566	29.9874	387.918	369.271	0.342664	0.924718	22.4566	28.6877	387.481	503.093	-0.320626	0.999975
C16C10.8	WBGene00007628	chrIII	4161921	4164147	20.4535	26.9716	282.281	276.31	0.382888	0.939485	20.4535	23.0361	282.168	324.759	-0.146744	0.999975
C16C10.9	WBGene00007629	chrIII	4155361	4157368	0.515217	0.3209	6.7879	3.56335	-0.515998	0.956118	0.515217	0.204293	6.82788	3.36642	1.0763	0.999975
C16C2.1	WBGene00000430	chrI	9727194	9728012	0.697109	0.915942	5.53322	5.01418	0.271629	0.974337	0.697109	0.776599	5.45887	6.25134	-0.13949	0.999975
C16C2.2	WBGene00001145	chrI	9722540	9726281	37.4772	37.2161	1729.61	1136.15	-0.192554	0.957157	37.4772	35.5083	1728.77	1828.55	-0.0248757	0.999975
C16C2.3	WBGene00007620	chrI	9715312	9728099	11.9273	8.63152	560.592	244.878	-0.781152	0.923628	11.9273	11.1744	560.67	513.719	0.182247	0.999975
C16C2.4	WBGene00007621	chrI	9712813	9715223	40.096	46.799	813.706	687.844	0.171308	0.949791	40.096	36.1513	813.077	777.345	0.120912	0.999975
C16C4.1	WBGene00015825	chrII	1894342	1894687	0	0	NA	NA	NA	NA	0	0	0.204042	0.343882	-0.696972	0.999975
C16C4.10	WBGene00015834	chrII	1881615	1882810	0	0.0416391	0.204022	0.618636	2.0141	NA	0	0.0163923	0.204043	0.45836	-1.11154	0.999975
C16C4.11	WBGene00015835	chrII	1883600	1884740	0	0	NA	NA	NA	NA	0	0.0261375	0.204042	0.343882	-0.696972	0.999975
C16C4.12	WBGene00015836	chrII	1885443	1886484	0	0	NA	NA	NA	NA	0	0	NA	NA	NA	NA
C16C4.13	WBGene00015837	chrII	1887213	1889176	0.0121512	0.0398218	0.445132	0.92835	1.47417	NA	0.0121512	0.0185258	0.445657	0.849667	-0.87489	0.999975
C16C4.14	WBGene00015838	chrII	1889913	1890787	0.028459	0.030749	0.35076	0.314793	0.257655	NA	0.028459	0.032165	0.350434	0.343884	0.083295	0.999975
C16C4.15	WBGene00015839	chrII	1871552	1873266	0.586138	0.851964	9.04577	10.2103	0.588445	0.956137	0.586138	0.261045	8.99728	3.8788	1.26995	0.999975
C16C4.16	WBGene00015840	chrII	1874280	1875111	0	0.069723	0.204021	0.314792	1.03942	NA	0	0.0545127	0.204043	0.45836	-1.11154	0.999975
C16C4.17	WBGene00044359	chrII	1864736	1864889	0	0	0.204021	0.314792	1.03942	NA	0	0	NA	NA	NA	NA
C16C4.18	WBGene00194998	chrII	1860632	1861085	2.66911	6.1628	5.39988	4.07177	0.0064637	0.998755	2.66911	1.86879	5.409	0.513523	3.45294	0.999975
C16C4.3	WBGene00015827	chrII	1875962	1877242	0	0.0164804	0.204021	0.314792	1.03942	NA	0	0.0127081	0.204043	0.502404	-1.2439	0.999975
C16C4.4	WBGene00015828	chrII	1869414	1870802	0.627891	0.967983	13.9094	12.4744	0.256648	0.984051	0.627891	0.739326	13.9667	16.1615	-0.154498	0.999975
C16C4.5	WBGene00015829	chrII	1866390	1867899	1.08796	0.402019	18.6629	4.89037	-1.51842	0.77852	1.08796	1.02062	18.6652	17.8441	0.120976	0.999975
C16C4.6	WBGene00015830	chrII	1862638	1863787	0.0361658	0	0.802304	0.190933	-1.65734	NA	0.0361658	0.0292777	0.766115	0.541164	0.55757	0.999975
C16C4.8	WBGene00015832	chrII	1877583	1878764	0	0	NA	NA	NA	NA	0	0.00396885	NA	NA	NA	NA
C16C4.9	WBGene00015833	chrII	1879703	1880713	0	0	NA	NA	NA	NA	0	0	NA	NA	NA	NA
C16C8.10	WBGene00015848	chrII	3464153	3464683	0	0	NA	NA	NA	NA	0	0	NA	NA	NA	NA
C16C8.11	WBGene00015849	chrII	3453766	3454683	1.19357	2.19181	19.2831	20.1485	0.477067	0.959966	1.19357	1.29786	19.4379	19.8501	0.025796	0.999975
C16C8.12	WBGene00015850	chrII	3452644	3453631	0.796008	1.54234	12.3464	13.7761	0.571806	0.959966	0.796008	1.69023	12.401	25.5121	-0.984644	0.999975
C16C8.13	WBGene00015851	chrII	3451423	3452504	1.61701	1.25168	28.5295	12.1323	-0.819869	0.954286	1.61701	1.48793	28.6303	26.1885	0.184685	NA
C16C8.14	WBGene00015852	chrII	3445762	3451062	1.1186	1.9938	25.4917	31.6655	0.726618	0.945973	1.1186	1.64414	25.631	37.7068	-0.500862	0.999975
C16C8.16	WBGene00015853	chrII	3445767	3446740	4.1895	3.86943	76.2136	38.8665	-0.557788	NA	4.1895	4.85248	76.5	85.0795	-0.0972771	NA
C16C8.17	WBGene00015854	chrII	3440829	3442448	0.035847	0.0248578	0.623132	0.794056	0.763438	NA	0.035847	0.03887	0.625413	0.721387	-0.149891	0.999975
C16C8.18	WBGene00015855	chrII	3429408	3431309	0.575962	1.51274	11.966	15.3764	0.775515	NA	0.575962	0.318373	11.9778	5.56931	1.16086	0.999975
C16C8.19	WBGene00015856	chrII	3458503	3459059	0.053724	0	0.350759	0.190932	-0.463682	NA	0.053724	0	0.350432	0.203769	0.838272	0.999975
C16C8.2	WBGene00015841	chrII	3431284	3436515	27.9497	20.1913	1356.55	729.282	-0.48166	0.898891	27.9497	17.9373	1355.69	890.217	0.662875	0.999975
C16C8.20	WBGene00195070	chrII	3446959	3448023	0.94786	0.278757	8.24126	0.866532	-2.8358	0.74304	0.94786	1.26504	8.28333	12.2907	-0.513213	0.999975
C16C8.21	WBGene00195071	chrII	3448208	3448762	0.367689	0.168424	4.53128	0.793933	-2.09909	NA	0.367689	0.23564	4.41341	1.95827	1.22839	0.999975
C16C8.22	WBGene00195072	chrII	3442492	3443257	0	0.0371345	0.204022	0.725773	2.24453	NA	0	0.125947	0.204043	0.7509	-1.82367	0.999975
C16C8.4	WBGene00015842	chrII	3443281	3444385	9.44147	5.77376	166.303	51.165	-1.28685	NA	9.44147	9.09766	167.113	148.197	0.229382	NA
C16C8.5	WBGene00015843	chrII	3444730	3445367	3.78798	3.09986	34.9198	17.4429	-0.587675	0.956137	3.78798	3.91648	35.0567	35.2253	0.0491542	0.999975
C16C8.7	WBGene00015845	chrII	3459621	3460317	0	0	NA	NA	NA	NA	0	0.0413063	0.204043	0.45836	-1.11154	0.999975
C16C8.8	WBGene00015846	chrII	3461114	3461684	0	0	NA	NA	NA	NA	0	0.030864	0.204042	0.331132	-0.642465	0.999975
C16C8.9	WBGene00015847	chrII	3462569	3463208	0.155038	0.0847752	1.23768	0.529126	-0.812221	NA	0.155038	0	1.27829	0.203771	2.70527	0.999975
C16D2.1	WBGene00007633	chrII	9131665	9134477	0.202059	0.930299	2.16804	4.91459	1.59441	NA	0.202059	0.206341	2.1182	2.02861	0.118422	0.999975
C16D2.2	WBGene00195143	chrII	9136139	9137493	7.88112	13.1433	16.3783	18.8819	0.61895	0.945973	7.88112	14.3667	16.3778	28.873	-0.761906	0.999975
C16D2.3	WBGene00195144	chrII	9138057	9138369	9.75405	1.8915	13.4141	1.97984	-2.34656	0.659203	9.75405	8.06768	13.4743	12.3121	0.186209	0.999975
C16D6.1	WBGene00007634	chrX	12525274	12525714	5.0889	2.73165	26.2067	9.54687	-1.0431	0.945973	5.0889	3.96198	26.7435	20.6922	0.426174	0.999975
C16D6.2	WBGene00007635	chrX	12536944	12551608	1.75808	2.18285	69.122	62.7862	0.275037	0.954286	1.75808	2.50158	69.1864	98.5736	-0.454638	0.999975
C16D6.3	WBGene00007636	chrX	12526590	12527217	0	0	NA	NA	NA	NA	0	0	NA	NA	NA	NA
C16D9.1	WBGene00015857	chrV	8259295	8261284	13.431	21.54	315.891	378.971	0.676395	0.854322	13.431	17.3114	315.434	425.876	-0.377018	0.999975
C16D9.2	WBGene00004395	chrV	8228256	8238331	4.54009	3.17922	698.282	350.756	-0.57961	0.945973	4.54009	3.29261	697.989	527.651	0.459696	0.999975
C16D9.3	WBGene00015858	chrV	8238519	8239528	0.0264985	0	0.350759	0.190932	-0.463682	NA	0.0264985	0.0385475	0.349647	0.634135	-0.802816	0.999975
C16D9.4	WBGene00015859	chrV	8240910	8243181	3.31655	1.7142	94.8189	35.9368	-0.985978	0.649896	3.31655	2.54002	94.8709	74.8531	0.397979	0.999975
C16D9.5	WBGene00015860	chrV	8243611	8245234	0.648123	0.501128	16.263	8.89682	-0.456495	0.956137	0.648123	0.536858	16.0639	13.282	0.330423	0.999975
C16D9.6	WBGene00015861	chrV	8248091	8250269	3.41772	3.46555	74.2543	54.0321	-0.0449232	0.989836	3.41772	4.14685	73.9927	92.7847	-0.270428	0.999975
C16D9.7	WBGene00015862	chrV	8256810	8257934	0.12322	0.215485	2.17763	2.79545	0.774057	NA	0.12322	0.398433	2.21466	6.49804	-1.49684	0.999975
C16D9.8	WBGene00015863	chrV	8261369	8263546	0.0872965	0.19135	0.559672	0.831155	0.98427	NA	0.0872965	0.146985	0.571183	1.376	-1.21238	0.999975
C16D9.9	WBGene00015864	chrV	8264220	8264643	1.73899	4.66665	21.7348	68.8486	2.07715	0.484251	1.73899	3.33739	21.7616	33.5271	-0.56747	0.999975
C16E9.1	WBGene00015865	chrX	6940437	6943572	13.3797	24.3177	440.456	614.562	0.894296	0.662855	13.3797	17.5753	440.322	599.967	-0.39025	0.999975
C16E9.2	WBGene00015866	chrX	6935688	6938995	24.3377	37.1393	221.529	215.492	0.373877	0.945973	24.3377	29.2489	221.678	306.049	-0.409221	0.999975
C16E9.4	WBGene00002123	chrX	6943698	6956357	25.6089	18.6629	1251.28	640.109	-0.553281	0.814069	25.6089	25.1593	1251.31	1257.97	0.0484212	0.999975
C16H3.1	WBGene00015867	chrX	17617750	17619382	0.847762	1.60067	10.33	11.738	0.598075	0.945973	0.847762	1.20252	10.379	15.9181	-0.56093	0.999975
C16H3.2	WBGene00002272	chrX	17600395	17601428	756.03	648.603	5631.62	3740.01	-0.176772	0.968669	756.03	969.204	5635.12	7366.88	-0.330534	0.999975
C16H3.3	WBGene00015868	chrX	17601532	17609972	17.8923	25.0833	864.714	904.39	0.478457	0.945973	17.8923	18.6657	863.429	950.431	-0.0824289	0.999975
C17A2.1	WBGene00015869	chrII	3852991	3854617	0.0656405	0	0.802304	0.190933	-1.65734	NA	0.0656405	0.0281537	0.804709	0.343886	1.28261	0.999975
C17A2.2	WBGene00015870	chrII	3846329	3848145	0.0373099	0.0111862	0.859417	0.314795	-1.03521	NA	0.0373099	0.0140797	0.855758	0.343261	1.37397	0.999975
C17A2.3	WBGene00015871	chrII	3843610	3845511	0	0.0433829	0.204022	0.636598	2.05539	NA	0	0	NA	NA	NA	NA
C17A2.4	WBGene00015872	chrII	3839863	3841274	0	0.0121984	0.204021	0.314792	1.03942	NA	0	0	NA	NA	NA	NA
C17A2.5	WBGene00015873	chrII	3833251	3836017	0.0164401	0.0101818	0.715909	0.728422	0.438734	NA	0.0164401	0.0169634	0.719135	0.939907	-0.33018	0.999975
C17A2.7	WBGene00015875	chrII	3841915	3843407	0	0.0501667	0.204022	0.645318	2.07502	NA	0	0	0.204042	0.331132	-0.642465	0.999975
C17A2.8	WBGene00003662	chrII	3849054	3850727	0.0230936	0.0192807	0.35076	0.314793	0.257655	NA	0.0230936	0.0174262	0.350434	0.343884	0.083295	0.999975
C17B7.1	WBGene00006126	chrV	3351562	3352770	0.0986466	0	1.55874	0.190934	-2.6155	NA	0.0986466	0.112588	1.4924	1.53268	0.0176548	0.999975
C17B7.10	WBGene00015884	chrV	3340175	3342742	0.00649952	0.0534808	0.204023	1.09625	2.83951	NA	0.00649952	0.0144353	0.204043	0.588799	-1.47283	0.999975
C17B7.11	WBGene00015885	chrV	3345306	3346481	5.13431	3.07394	90.3462	38.6848	-0.809963	0.883168	5.13431	4.65581	90.8403	84.1951	0.165671	0.999975
C17B7.12	WBGene00015886	chrV	3353259	3353918	0.519581	0.413872	3.17206	1.86725	-0.35077	NA	0.519581	0.547832	3.3363	3.4828	-0.00592246	0.999975
C17B7.14	WBGene00194898	chrV	3320293	3320612	0	0	NA	NA	NA	NA	0	0	NA	NA	NA	NA
C17B7.2	WBGene00015876	chrV	3348626	3350964	0.293988	1.05673	4.1411	11.1422	1.84168	0.666456	0.293988	0.441036	4.04734	5.28008	-0.327511	0.999975
C17B7.3	WBGene00015877	chrV	3342800	3343862	0	0.124424	0.204023	0.896592	2.54946	NA	0	0.034471	0.204042	0.343882	-0.696972	0.999975
C17B7.4	WBGene00015878	chrV	3339344	3340089	0.111636	0.594311	1.26045	3.99742	2.07887	NA	0.111636	0.0468861	1.2334	0.461591	1.47403	0.999975
C17B7.5	WBGene00015879	chrV	3333631	3339012	0.563279	0.201094	32.3971	9.25577	-1.3937	0.916816	0.563279	0.931894	32.3796	55.5598	-0.722882	0.999975
C17B7.8	WBGene00015882	chrV	3320744	3324276	0.0728547	0.0766552	2.325	1.12245	-0.636844	NA	0.0728547	0.132975	2.38108	3.50814	-0.503019	0.999975
C17B7.9	WBGene00015883	chrV	3330911	3332110	0	0.0164742	NA	NA	NA	NA	0	0.16895	0.204044	1.28504	-2.59879	0.999975
C17C3.1	WBGene00015887	chrII	5570619	5574926	47.4016	76.349	838.838	1034.26	0.715873	0.915411	47.4016	47.3712	837.391	839.648	0.0521908	0.999975
C17C3.10	WBGene00001966	chrII	5539058	5541799	0.0994937	0.038136	0.802304	0.190933	-1.65734	NA	0.0994937	0.0294011	0.804713	0.458364	0.868057	0.999975
C17C3.11	WBGene00015893	chrII	5537817	5539085	0.0329162	0.14572	0.520787	1.49857	1.93855	NA	0.0329162	0	0.52246	0.20377	1.41445	0.999975
C17C3.12	WBGene00015894	chrII	5544761	5547473	25.3969	36.2597	17.4051	16.6681	0.351315	0.975937	25.3969	19.7867	17.1937	17.0162	0.07105	0.999975
C17C3.13	WBGene00015895	chrII	5567768	5568379	0	0.0497549	NA	NA	NA	NA	0	0.0364271	NA	NA	NA	NA
C17C3.15	WBGene00015896	chrII	5571284	5572285	4.2374	3.25495	45.6799	10.3204	-1.73233	0.83345	4.2374	4.45142	45.631	42.5798	0.15592	0.999975
C17C3.18	WBGene00002096	chrII	5544567	5547473	3.35011	14.1544	7.56758	2.46298	-1.20569	0.945973	3.35011	2.98618	7.4368	7.38474	0.0662094	0.999975
C17C3.19	WBGene00002095	chrII	5554599	5555289	2.09316	0.966676	3.59822	2.49214	-0.116164	NA	2.09316	3.85738	3.76467	7.52159	-0.942439	0.999975
C17C3.2	WBGene00015888	chrII	5566064	5566675	0	0.0497549	NA	NA	NA	NA	0	0.0364271	NA	NA	NA	NA
C17C3.20	WBGene00002121	chrII	5530483	5530911	0	0	NA	NA	NA	NA	0	0	0.204042	0.343882	-0.696972	0.999975
[truncated: 18,390 more rows]

## Sheet: CBP-1_MassSpec
Accession	Description	Score A2- IgG	Coverage A2	# Peptides A2	# PSM A2	Score B2- CBP	Coverage B2	# Peptides B2	# PSM B2	# AAs	MW [kDa]	calc. pI
160367188	immunoglobulin G binding protein A [Staphylococcus aureus subsp. aureus USA300_TCH1516]	5144.3	68.45	46	1385	4834.03	68.25	46	1276	504	55.0777	5.66846
387779299	immunoglobulin G binding protein A [Staphylococcus aureus subsp. aureus LGA251]	2699.07	58.45	36	629	2603.78	55.15	35	614	515	56.1292	5.46533
P34545	Protein cbp-1 OS=Caenorhabditis elegans GN=cbp-1 PE=1 SV=6 - [CBP1_CAEEL]					538.894	45.76	72	157	2017	222.27	8.30908
P05690	Vitellogenin-2 OS=Caenorhabditis elegans GN=vit-2 PE=1 SV=5 - [VIT2_CAEEL]	26.1198	7.5	11	11	484.086	53.94	84	128	1613	187.604	6.60986
291415360	PREDICTED: hypothetical protein LOC100009097 [Oryctolagus cuniculus]	650.498	59.44	15	127	476.109	53.61	14	89	360	39.0056	8.11865
121088	RecName: Full=Ig gamma chain C region	691.581	60.99	15	130	422.37	45.82	11	80	323	35.3818	8.29443
410563159	Chain H, Crystal Structure Of A Conformation-Dependent Rabbit Igg Fab Specific For Amyloid Prefibrillar Oligomers	531.994	52.56	7	87	366.889	41.4	5	59	215	22.6533	8.54346
1100745	immunoglobulin kappa chain [Oryctolagus cuniculus]	426.78	38.24	7	77	345.197	38.24	6	68	238	25.0661	4.94482
P55155	Vitellogenin-1 OS=Caenorhabditis elegans GN=vit-1 PE=1 SV=2 - [VIT1_CAEEL]	26.1198	7.49	11	11	295.717	36.01	60	83	1616	187.946	6.93213
O62055	Uncharacterized protein OS=Caenorhabditis elegans GN=C09F9.2 PE=1 SV=1 - [O62055_CAEEL]					238.668	30.88	37	55	1642	181.188	5.24951
O62020	Uncharacterized protein OS=Caenorhabditis elegans GN=lin-66 PE=1 SV=1 - [O62020_CAEEL]					213.395	54.07	21	51	627	68.6896	7.18115
A0A061AL58	Uncharacterized protein OS=Caenorhabditis elegans GN=lin-66 PE=1 SV=1 - [A0A061AL58_CAEEL]					205.184	53.85	20	49	624	68.2994	7.02002
223104	antibody,anti-streptococcal saccharide	184.044	41.74	7	40	155.03	36.7	5	29	218	23.0171	4.88135
P54816	Tat-binding homolog 7 OS=Caenorhabditis elegans GN=lex-1 PE=1 SV=3 - [TBP7_CAEEL]					153.561	35.32	34	42	1291	146.33	5.49072
P91482	Uncharacterized protein OS=Caenorhabditis elegans GN=CELE_T20F5.6 PE=1 SV=2 - [P91482_CAEEL]					151.868	47.73	30	36	794	87.9672	5.49072
410563160	Chain L, Crystal Structure Of A Conformation-Dependent Rabbit Igg Fab Specific For Amyloid Prefibrillar Oligomers	176.848	40.85	7	38	149.039	30.52	5	29	213	22.6619	4.7417
Q95QM8	Glutamine-Fructose 6-phosphate AminoTransferase homolog OS=Caenorhabditis elegans GN=gfat-1 PE=1 SV=1 - [Q95QM8_CAEEL]					128.719	38.2	24	30	712	79.4938	6.37939
O02238	Prion-like-(Q/N-rich)-domain-bearing protein OS=Caenorhabditis elegans GN=pqn-27 PE=1 SV=2 - [O02238_CAEEL]					126.376	40.45	17	30	534	61.0721	5.021
Q9U302	Polyadenylate-binding protein OS=Caenorhabditis elegans GN=pab-1 PE=1 SV=1 - [Q9U302_CAEEL]					112.102	47.99	23	36	646	71.6025	9.02686
34810683	Chain A, Refined Solution Nmr Structure Of The Z Domain Of Staphylococcal Protein A	109.083	79.31	5	31	111.476	79.31	5	29	58	6.63636	5.2876
P18948	Vitellogenin-6 OS=Caenorhabditis elegans GN=vit-6 PE=1 SV=5 - [VIT6_CAEEL]	26.2302	7.45	9	9	98.666	20.17	26	27	1651	193.197	7.2251
H2KYD3	Uncharacterized protein OS=Caenorhabditis elegans GN=CELE_F57C9.4 PE=1 SV=1 - [H2KYD3_CAEEL]					96.408	36.29	20	26	653	74.1466	5.75732
Q18688	Heat shock protein 90 OS=Caenorhabditis elegans GN=daf-21 PE=1 SV=1 - [HSP90_CAEEL]	37.2723	20.37	12	12	94.1404	36.32	24	26	702	80.2326	5.04639
512049665	immunoglobulin G-binding protein A, partial [Staphylococcus sp. HGB0015]	107.504	23.64	3	32	93.1937	17.27	2	28	220	24.0679	4.56396
H2KYD4	Uncharacterized protein OS=Caenorhabditis elegans GN=CELE_F57C9.4 PE=1 SV=1 - [H2KYD4_CAEEL]					89.616	26.75	20	25	856	97.5142	7.12256
Q19699	Glutamine-Fructose 6-phosphate AminoTransferase homolog OS=Caenorhabditis elegans GN=gfat-2 PE=1 SV=1 - [Q19699_CAEEL]					88.7555	26.2	18	21	710	79.2458	6.72705
O02056	60S ribosomal protein L4 OS=Caenorhabditis elegans GN=rpl-4 PE=1 SV=3 - [RL4_CAEEL]	19.486	22.9	6	6	87.6363	49.28	15	20	345	38.6352	11.2241
G5EBV6	PGL-3 OS=Caenorhabditis elegans GN=pgl-3 PE=1 SV=1 - [G5EBV6_CAEEL]					83.5413	28.43	17	22	693	74.7991	5.18604
P34690	Tubulin alpha-2 chain OS=Caenorhabditis elegans GN=tba-2 PE=2 SV=1 - [TBA2_CAEEL]	33.6497	26.12	8	8	82.0768	41.52	15	21	448	49.8814	5.04639
294484	Ig lambda chain, partial [Oryctolagus cuniculus]	52.4292	37.69	6	14	77.5301	52.76	8	20	199	21.5875	6.31592
P09446	Heat shock 70 kDa protein A OS=Caenorhabditis elegans GN=hsp-1 PE=1 SV=2 - [HSP7A_CAEEL]	34.0869	15.63	7	10	75.8726	26.88	14	19	640	69.6796	5.64307
P06125	Vitellogenin-5 OS=Caenorhabditis elegans GN=vit-5 PE=2 SV=2 - [VIT5_CAEEL]	15.7251	5.12	8	8	74.0889	17.65	24	26	1603	186.322	7.00537
P18947	Vitellogenin-4 OS=Caenorhabditis elegans GN=vit-4 PE=1 SV=3 - [VIT4_CAEEL]	15.7251	5.12	8	8	73.9714	18.22	25	26	1603	186.192	7.00537
O18688	Tubulin alpha chain OS=Caenorhabditis elegans GN=tba-1 PE=1 SV=1 - [O18688_CAEEL]	20.3439	14.03	5	5	70.9868	34.74	13	18	449	49.9774	5.04639
O17921	Tubulin beta chain OS=Caenorhabditis elegans GN=tbb-1 PE=1 SV=1 - [O17921_CAEEL]	11.1073	9.13	3	3	69.9743	33.63	13	16	449	50.2062	4.89404
P52275	Tubulin beta-2 chain OS=Caenorhabditis elegans GN=tbb-2 PE=3 SV=1 - [TBB2_CAEEL]	11.1073	11.78	4	4	69.9639	33.56	13	16	450	50.3122	4.89404
P46561	ATP synthase subunit beta, mitochondrial OS=Caenorhabditis elegans GN=atp-2 PE=1 SV=2 - [ATPB_CAEEL]	33.5331	21.19	8	9	68.8208	40.33	15	17	538	57.4909	5.77002
Q9XXK1	ATP synthase subunit alpha, mitochondrial OS=Caenorhabditis elegans GN=H28O16.1 PE=1 SV=1 - [ATPA_CAEEL]	29.5214	17.84	9	9	64.2834	35.69	17	19	538	57.7516	8.93896
B1V8A0	Endophilin-A homolog OS=Caenorhabditis elegans GN=unc-57 PE=1 SV=1 - [SH3GH_CAEEL]					64.0376	35.96	10	13	381	42.8293	6.1001
O01802	60S ribosomal protein L7 OS=Caenorhabditis elegans GN=rpl-7 PE=3 SV=1 - [RL7_CAEEL]	22.4214	18.03	5	6	63.0973	50.41	16	17	244	28.1143	10.1548
O45865	Adenine Nucleotide Translocator OS=Caenorhabditis elegans GN=ant-1.1 PE=1 SV=1 - [O45865_CAEEL]	15.3241	14.33	4	5	62.1581	39.67	15	20	300	33.0234	9.71533
Q966C6	60S ribosomal protein L7a OS=Caenorhabditis elegans GN=rpl-7A PE=1 SV=3 - [RL7A_CAEEL]	13.0816	14.34	4	5	60.2657	38.49	13	19	265	30.1559	10.8286
P04970	Glyceraldehyde-3-phosphate dehydrogenase 1 OS=Caenorhabditis elegans GN=gpd-1 PE=3 SV=1 - [G3P1_CAEEL]	12.3465	17.6	3	3	56.9979	46.04	13	16	341	36.3597	7.88428
Q9XVF7	60S ribosomal protein L8 OS=Caenorhabditis elegans GN=rpl-8 PE=3 SV=1 - [RL8_CAEEL]	23.9619	22.69	5	6	56.5151	37.69	8	12	260	28.1863	11.063
P17331	Glyceraldehyde-3-phosphate dehydrogenase 4 OS=Caenorhabditis elegans GN=gpd-4 PE=3 SV=1 - [G3P4_CAEEL]	7.5452	10.56	2	2	53.8827	46.04	13	16	341	36.4037	7.88428
P48156	40S ribosomal protein S8 OS=Caenorhabditis elegans GN=rps-8 PE=3 SV=1 - [RS8_CAEEL]	32.3701	43.75	7	10	53.1996	50.48	9	13	208	23.7358	10.5503
Q20713	Uncharacterized protein OS=Caenorhabditis elegans GN=CELE_F53B3.5 PE=1 SV=3 - [Q20713_CAEEL]					52.7854	27.88	8	16	312	35.6156	8.35303
A0A0S4XR43	CCAR1 homolog OS=Caenorhabditis elegans GN=ccar-1 PE=1 SV=1 - [A0A0S4XR43_CAEEL]					52.324	15.23	12	13	1215	135.11	6.04932
P48154	40S ribosomal protein S3a OS=Caenorhabditis elegans GN=rps-1 PE=3 SV=2 - [RS3A_CAEEL]	18.1576	25.29	5	5	49.593	48.64	15	15	257	28.9424	9.59814
P34574	Probable clathrin heavy chain 1 OS=Caenorhabditis elegans GN=chc-1 PE=3 SV=1 - [CLH_CAEEL]					48.8007	9.93	14	14	1681	191.421	5.99854
P50880	60S ribosomal protein L3 OS=Caenorhabditis elegans GN=rpl-3 PE=2 SV=1 - [RL3_CAEEL]	13.2967	12.72	4	4	48.5653	22.94	10	15	401	45.6306	10.4038
P51403	40S ribosomal protein S2 OS=Caenorhabditis elegans GN=rps-2 PE=3 SV=1 - [RS2_CAEEL]	10.7007	8.82	2	3	46.682	31.25	8	12	272	28.9424	10.1108
Q20497	Mediator of RNA polymerase II transcription subunit 12 OS=Caenorhabditis elegans GN=dpy-22 PE=1 SV=2 - [MED12_CAEEL]					46.6045	4.83	11	13	3498	400.526	8.32373
Q19520	Uncharacterized protein OS=Caenorhabditis elegans GN=CELE_F17C11.10 PE=1 SV=1 - [Q19520_CAEEL]					46.0322	17.08	15	15	1101	122.839	5.21143
P48152	40S ribosomal protein S3 OS=Caenorhabditis elegans GN=rps-3 PE=3 SV=1 - [RS3_CAEEL]	22.4524	27.13	7	8	45.1759	53.04	12	15	247	27.2965	9.59814
Q9N3X2	40S ribosomal protein S4 OS=Caenorhabditis elegans GN=rps-4 PE=1 SV=1 - [RS4_CAEEL]	16.5172	29.73	7	7	45.1748	45.95	12	15	259	29.0258	10.4624
O62486	NanOS related OS=Caenorhabditis elegans GN=nos-3 PE=1 SV=1 - [O62486_CAEEL]					44.5929	14.58	6	8	871	96.1233	8.07471
Q17430	SART-3/p110 homolog OS=Caenorhabditis elegans GN=sart-3 PE=1 SV=1 - [Q17430_CAEEL]					44.4119	17.7	12	15	836	95.4272	6.85889
Q6A8K1	Actin-4 OS=Caenorhabditis elegans GN=act-4 PE=1 SV=1 - [Q6A8K1_CAEEL]	12.5015	12.43	3	3	42.0211	39.5	9	11	362	40.4002	5.8335
Q21215	Guanine nucleotide-binding protein subunit beta-2-like 1 OS=Caenorhabditis elegans GN=rack-1 PE=1 SV=3 - [GBLP_CAEEL]	8.91477	10.15	3	3	40.7668	40.92	8	9	325	35.8079	6.93213
O44480	60S ribosomal protein L18a OS=Caenorhabditis elegans GN=rpl-20 PE=3 SV=2 - [RL18A_CAEEL]	12.9973	33.89	5	5	40.1716	44.44	9	12	180	20.9461	10.3745
P91128	60S ribosomal protein L13 OS=Caenorhabditis elegans GN=rpl-13 PE=3 SV=1 - [RL13_CAEEL]	27.5576	40.58	7	8	38.8276	40.58	8	11	207	23.7381	11.0923
Q95XJ0	Uncharacterized protein OS=Caenorhabditis elegans GN=CELE_Y69A2AR.18 PE=1 SV=1 - [Q95XJ0_CAEEL]					38.7799	43.14	11	13	299	32.362	9.0415
P48150	40S ribosomal protein S14 OS=Caenorhabditis elegans GN=rps-14 PE=3 SV=1 - [RS14_CAEEL]	15.9631	20.39	3	4	38.4558	37.5	9	10	152	16.2387	10.4038
O18650	40S ribosomal protein S19 OS=Caenorhabditis elegans GN=rps-19 PE=2 SV=1 - [RS19_CAEEL]	19.1042	41.78	6	6	38.3178	45.21	8	12	146	16.3118	10.2866
Q21229	Uncharacterized protein OS=Caenorhabditis elegans GN=CELE_K04G2.10 PE=1 SV=1 - [Q21229_CAEEL]					38.198	29.47	6	9	319	38.2993	7.66455
Q9N4I4	60S ribosomal protein L10a OS=Caenorhabditis elegans GN=rpl-10a PE=3 SV=1 - [RL10A_CAEEL]					36.2303	43.98	7	10	216	24.1221	9.92041
Q20206	Ribosomal Protein, Small subunit OS=Caenorhabditis elegans GN=rps-11 PE=1 SV=1 - [Q20206_CAEEL]	19.5203	47.1	6	6	35.9781	47.1	7	10	155	17.7336	10.4624
Q09533	60S ribosomal protein L10 OS=Caenorhabditis elegans GN=rpl-10 PE=3 SV=1 - [RL10_CAEEL]	22.6466	33.18	6	7	34.0323	36.45	8	11	214	24.7328	10.3452
P46769	40S ribosomal protein SA OS=Caenorhabditis elegans GN=rps-0 PE=1 SV=3 - [RSSA_CAEEL]	11.9684	17.03	4	4	33.8646	36.59	7	8	276	30.6836	5.69385
Q8ITY9	Uncharacterized protein OS=Caenorhabditis elegans GN=CELE_R148.5 PE=1 SV=1 - [Q8ITY9_CAEEL]					33.8225	22.57	9	9	505	55.8074	7.12256
P53013	Elongation factor 1-alpha OS=Caenorhabditis elegans GN=eft-3 PE=3 SV=1 - [EF1A_CAEEL]	23.6388	19.22	7	7	33.6398	26.35	9	10	463	50.6363	8.93896
Q93572	60S acidic ribosomal protein P0 OS=Caenorhabditis elegans GN=rpa-0 PE=1 SV=3 - [RLA0_CAEEL]	15.0368	16.67	3	4	33.5708	34.29	8	9	312	33.7525	6.7124
P18334	Casein kinase II subunit alpha OS=Caenorhabditis elegans GN=kin-3 PE=1 SV=1 - [CSK2A_CAEEL]					33.1573	35.83	9	9	360	42.2304	6.93213
Q19746	Innexin-3 OS=Caenorhabditis elegans GN=inx-3 PE=1 SV=2 - [INX3_CAEEL]					32.8592	26.43	11	12	420	48.8853	6.82959
P49041	40S ribosomal protein S5 OS=Caenorhabditis elegans GN=rps-5 PE=3 SV=1 - [RS5_CAEEL]					32.8322	33.81	6	8	210	23.1403	9.80322
Q9BIC3	Enoyl-CoA Hydratase OS=Caenorhabditis elegans GN=ech-1.2 PE=1 SV=1 - [Q9BIC3_CAEEL]	2.41761	2.65	2	4	32.7877	16.29	11	11	755	81.4354	9.29053
Q9TZQ3	P granule abnormality protein 1 OS=Caenorhabditis elegans GN=pgl-1 PE=1 SV=1 - [PGL1_CAEEL]					32.3699	16.85	11	11	730	78.4056	5.021
O02482	Transcription factor unc-37 OS=Caenorhabditis elegans GN=unc-37 PE=1 SV=1 - [UNC37_CAEEL]					32.0776	18.63	8	8	612	65.5752	5.52881
109292	Ig lambda chain precursor - rabbit (fragment)	66.8179	42.67	8	14	31.379	25	4	8	232	24.7131	5.8208
G5EC16	SMN (Human Survival Motor Neuron gene) homolog OS=Caenorhabditis elegans GN=smn-1 PE=1 SV=1 - [G5EC16_CAEEL]					31.32	42.03	5	8	207	22.8969	4.88135
Q9N4G4	Mediator of RNA polymerase II transcription subunit 1.1 OS=Caenorhabditis elegans GN=sop-3 PE=1 SV=2 - [MED1_CAEEL]					31.286	8.2	8	9	1475	164.445	8.74854
O18240	Ribosomal Protein, Small subunit OS=Caenorhabditis elegans GN=rps-18 PE=1 SV=1 - [O18240_CAEEL]	15.0076	34.42	6	6	30.8744	49.35	9	9	154	17.7596	10.4624
Q93442	Mediator of RNA polymerase II transcription subunit 13 OS=Caenorhabditis elegans GN=let-19 PE=1 SV=3 - [MED13_CAEEL]					30.8261	4.05	9	11	2862	324.931	6.78564
B3CJ34	GCN (Yeast General Control Nondrepressible) homolog OS=Caenorhabditis elegans GN=gcn-1 PE=1 SV=2 - [B3CJ34_CAEEL]					30.5723	4.94	10	10	2651	291.415	6.17627
Q9U207	Prion-like-(Q/N-rich)-domain-bearing protein OS=Caenorhabditis elegans GN=pqn-87 PE=1 SV=3 - [Q9U207_CAEEL]					30.112	8.93	9	9	1456	160.872	6.25244
Q21752	Probable voltage-dependent anion-selective channel OS=Caenorhabditis elegans GN=vdac-1 PE=3 SV=2 - [VDAC_CAEEL]	5.2395	9.89	2	2	29.9345	34.98	9	9	283	29.9424	9.21729
Q95XJ5	Uncharacterized protein OS=Caenorhabditis elegans GN=CELE_Y45G5AM.7 PE=1 SV=1 - [Q95XJ5_CAEEL]					29.619	26.33	8	8	433	50.082	6.34131
Q9GZH5	Proteasome Regulatory Particle, Non-ATPase-like OS=Caenorhabditis elegans GN=rpn-1 PE=1 SV=1 - [Q9GZH5_CAEEL]					29.6048	12.44	7	7	981	107.313	6.29053
P34334	60S ribosomal protein L21 OS=Caenorhabditis elegans GN=rpl-21 PE=3 SV=3 - [RL21_CAEEL]	10.8954	14.91	2	2	27.0757	49.07	7	7	161	18.2989	11.1509
P49180	60S ribosomal protein L35a OS=Caenorhabditis elegans GN=rpl-33 PE=1 SV=3 - [RL35A_CAEEL]					26.4824	29.84	3	8	124	13.7596	11.2534
P91914	60S ribosomal protein L27 OS=Caenorhabditis elegans GN=rpl-27 PE=2 SV=1 - [RL27_CAEEL]	18.1853	30.15	4	5	26.1817	30.15	4	7	136	15.7179	10.3452
Q9BL19	60S ribosomal protein L17 OS=Caenorhabditis elegans GN=rpl-17 PE=3 SV=1 - [RL17_CAEEL]					25.8087	36.36	4	5	187	21.4993	10.3013
P34428	Glutamine/asparagine-rich protein mdt-30 OS=Caenorhabditis elegans GN=mdt-30 PE=4 SV=2 - [MDT30_CAEEL]					25.6825	14.59	5	8	466	52.769	7.69385
P27420	Heat shock 70 kDa protein C OS=Caenorhabditis elegans GN=hsp-3 PE=3 SV=2 - [HSP7C_CAEEL]	8.67583	4.84	2	2	25.5776	16.79	9	9	661	72.9785	5.05908
Q65ZB1	PeriLIpiN homolog OS=Caenorhabditis elegans GN=plin-1 PE=1 SV=1 - [Q65ZB1_CAEEL]					25.5346	22.08	6	6	385	42.5059	5.41455
Q9XWS2	Exocyst complex component 4 OS=Caenorhabditis elegans GN=sec-8 PE=2 SV=2 - [EXOC4_CAEEL]					25.3606	13.1	8	8	893	100.951	7.57666
P91276	Importin subunit alpha-2 OS=Caenorhabditis elegans GN=ima-2 PE=1 SV=1 - [IMA2_CAEEL]					25.3469	15.44	5	6	531	59.1387	5.14795
9246511	immunoglobulin kappa light chain variable region [Oryctolagus cuniculus]	61.333	36.11	2	11	24.825	36.11	2	6	108	11.3216	5.18604
O02639	60S ribosomal protein L19 OS=Caenorhabditis elegans GN=rpl-19 PE=3 SV=1 - [RL19_CAEEL]	9.18234	17.17	3	3	24.6895	23.23	6	7	198	23.6372	11.3706
P40614	Phosphate carrier protein, mitochondrial OS=Caenorhabditis elegans GN=F01G4.6 PE=2 SV=1 - [MPCP_CAEEL]	4.48857	5.29	2	2	24.6784	22.35	9	9	340	36.65	8.95361
27374097	antibody variable domain [Oryctolagus cuniculus]	10.9619	27.78	2	3	24.5158	27.78	2	7	108	11.6218	5.40186
O01504	60S acidic ribosomal protein P2 OS=Caenorhabditis elegans GN=rpa-2 PE=3 SV=2 - [RLA2_CAEEL]	10.6219	32.71	3	3	24.2824	53.27	5	6	107	10.8064	4.67822
P47991	60S ribosomal protein L6 OS=Caenorhabditis elegans GN=rpl-6 PE=1 SV=1 - [RL6_CAEEL]	7.19548	9.68	3	3	24.063	33.18	8	8	217	24.2977	10.9897
H2KYR1	VIG (Drosophila Vasa Intronic Gene) ortholog OS=Caenorhabditis elegans GN=vig-1 PE=1 SV=1 - [H2KYR1_CAEEL]	6.49169	8.99	2	2	23.7766	22.75	4	5	378	40.3824	9.72998
Q20228	40S ribosomal protein S9 OS=Caenorhabditis elegans GN=rps-9 PE=3 SV=1 - [RS9_CAEEL]	3.72326	8.47	2	2	23.4787	35.98	7	8	189	21.9433	10.521
125738	RecName: Full=Ig kappa chain V region 4135	13.7555	31.78	2	3	23.3263	31.78	2	5	107	11.1754	4.95752
P91374	60S ribosomal protein L15 OS=Caenorhabditis elegans GN=rpl-15 PE=3 SV=1 - [RL15_CAEEL]	5.55635	10.29	2	2	23.2346	23.04	5	6	204	24.1102	11.6343
G1K845	MIZ-type zinc finger putative transcription factor OS=Caenorhabditis elegans GN=miz-1 PE=1 SV=1 - [G1K845_CAEEL]					22.9505	12.46	6	7	634	70.6532	7.98682
P91913	60S acidic ribosomal protein P1 OS=Caenorhabditis elegans GN=rla-1 PE=3 SV=2 - [RLA1_CAEEL]	6.16204	21.62	2	2	22.1107	69.37	4	5	111	11.2766	4.32275
Q9NEN6	40S ribosomal protein S6 OS=Caenorhabditis elegans GN=rps-6 PE=1 SV=1 - [RS6_CAEEL]	10.5565	17.07	4	4	21.4041	30.49	7	8	246	28.1183	10.2573
P49405	60S ribosomal protein L5 OS=Caenorhabditis elegans GN=rpl-5 PE=3 SV=1 - [RL5_CAEEL]	5.38152	8.19	2	2	21.203	22.53	5	5	293	33.3657	9.75928
Q23652	U Six snRNA Interacting Protein OS=Caenorhabditis elegans GN=usip-1 PE=1 SV=2 - [Q23652_CAEEL]					21.0068	14.35	8	9	662	75.2394	6.80029
Q8WQA8	Ribosomal Protein, Small subunit OS=Caenorhabditis elegans GN=rps-20 PE=1 SV=1 - [Q8WQA8_CAEEL]	17.4187	24.79	3	4	20.8305	24.79	3	5	117	13.2262	9.83252
P49181	60S ribosomal protein L36 OS=Caenorhabditis elegans GN=rpl-36 PE=1 SV=3 - [RL36_CAEEL]	9.3327	13.46	3	3	20.7115	29.81	5	6	104	11.8768	11.6489
P34662	60S ribosomal protein L35 OS=Caenorhabditis elegans GN=rpl-35 PE=3 SV=1 - [RL35_CAEEL]					20.3843	26.02	5	7	123	14.1862	11.2681
O45946	60S ribosomal protein L18 OS=Caenorhabditis elegans GN=rpl-18 PE=3 SV=1 - [RL18_CAEEL]	11.4269	19.68	3	3	20.1018	36.17	5	5	188	20.9836	11.3999
P20163	Heat shock 70 kDa protein D OS=Caenorhabditis elegans GN=hsp-4 PE=1 SV=2 - [HSP7D_CAEEL]					19.911	9.44	6	6	657	72.244	5.13525
Q20121	Fatty Acid CoA Synthetase family OS=Caenorhabditis elegans GN=acs-4 PE=1 SV=2 - [Q20121_CAEEL]					19.7149	12.31	8	8	731	81.2012	7.94287
I2HAJ2	Ribosomal Protein, Large subunit OS=Caenorhabditis elegans GN=rpl-30 PE=1 SV=1 - [I2HAJ2_CAEEL]					19.662	70.21	5	8	94	10.1813	8.83643
G5ED41	Cullin-associated NEDD8-dissociated protein 1 OS=Caenorhabditis elegans GN=cand-1 PE=1 SV=1 - [CAND1_CAEEL]					19.6157	6.36	6	6	1274	141.637	5.73193
P98080	Cytochrome b-c1 complex subunit 1, mitochondrial OS=Caenorhabditis elegans GN=ucr-1 PE=3 SV=2 - [UCR1_CAEEL]					19.6155	13.38	5	6	471	51.7042	6.53662
P27639	Eukaryotic initiation factor 4A OS=Caenorhabditis elegans GN=inf-1 PE=2 SV=1 - [IF4A_CAEEL]					19.4643	16.67	5	5	402	45.379	5.14795
P00761	cRAP TRYP_PIG Trypsin OS=Sus scrofa PE=1 SV=1	21.128	25.11	4	5	19.4036	25.11	4	5	231	24.3938	7.18115
Q9BKU5	Uncharacterized protein OS=Caenorhabditis elegans GN=CELE_Y37E3.8 PE=1 SV=1 - [Q9BKU5_CAEEL]	11.5962	22.76	3	4	19.2004	29.66	4	6	145	16.1937	10.5503
40805277	immunoglobulin heavy chain VDJ region [Oryctolagus cuniculus]					19.1279	47.52	2	4	101	10.701	7.66455
P46502	Probable 26S protease regulatory subunit 6B OS=Caenorhabditis elegans GN=rpt-3 PE=3 SV=1 - [PRS6B_CAEEL]					18.842	15.94	5	5	414	46.3289	5.22412
Q22054	40S ribosomal protein S16 OS=Caenorhabditis elegans GN=rps-16 PE=1 SV=3 - [RS16_CAEEL]	8.48532	21.53	3	3	18.4651	28.47	5	6	144	16.306	10.3013
A7LPI4	Uncharacterized protein OS=Caenorhabditis elegans GN=lsy-22 PE=1 SV=1 - [A7LPI4_CAEEL]					18.4045	17.87	3	7	291	31.2017	6.80029
Q19262	Exocyst complex component 3 OS=Caenorhabditis elegans GN=sec-6 PE=3 SV=2 - [EXOC3_CAEEL]					18.2161	8.67	6	6	796	90.5964	6.55127
476007827	RecName: Full=Complement C4-A; AltName: Full=Acidic complement C4; AltName: Full=C3 and PZP-like alpha-2-macroglobulin domain-containing protein 2; Contains: RecName: Full=Complement C4 beta chain; Contains: RecName: Full=Complement C4-A alpha chain; Contains: RecName: Full=C4a anaphylatoxin; Contains: RecName: Full=C4b-A; Contains: RecName: Full=C4d-A; Contains: RecName: Full=Complement C4 gamma…	12.0904	2.92	4	4	18.1739	3.44	5	6	1744	192.664	7.07861
P46550	T-complex protein 1 subunit zeta OS=Caenorhabditis elegans GN=cct-6 PE=1 SV=1 - [TCPZ_CAEEL]					18.0977	14.47	6	6	539	58.868	6.27783
Q19162	60S ribosomal protein L11-2 OS=Caenorhabditis elegans GN=rpl-11.2 PE=3 SV=1 - [RL112_CAEEL]					17.8165	16.33	3	7	196	22.7622	10.0229
Q9TZI2	Zinc finger putative Transcription Factor family OS=Caenorhabditis elegans GN=ztf-4 PE=1 SV=2 - [Q9TZI2_CAEEL]					17.8017	14.71	3	4	367	39.7222	6.12549
O17071	Probable 26S protease regulatory subunit 10B OS=Caenorhabditis elegans GN=rpt-4 PE=1 SV=2 - [PRS10_CAEEL]	4.81252	6.16	2	2	17.6258	22.17	8	8	406	45.83	7.6792
O01871	Uncharacterized protein OS=Caenorhabditis elegans GN=CELE_D1007.4 PE=1 SV=1 - [O01871_CAEEL]					17.5572	23.21	3	4	168	19.1369	5.99854
Q17763	ATP synthase subunit OS=Caenorhabditis elegans GN=atp-5 PE=1 SV=2 - [Q17763_CAEEL]	6.45648	13.09	2	2	17.2571	25.13	4	5	191	21.7843	7.1958
A0A0K3AR51	Uncharacterized protein OS=Caenorhabditis elegans GN=CELE_F22G12.5 PE=1 SV=1 - [A0A0K3AR51_CAEEL]					17.2227	3.17	6	6	2338	259.443	8.01611
Q23312	40S ribosomal protein S7 OS=Caenorhabditis elegans GN=rps-7 PE=3 SV=1 - [RS7_CAEEL]	5.3025	10.31	2	2	17.1224	27.84	5	5	194	22.0443	9.90576
P04264	cRAP K2C1_HUMAN Keratin, type II cytoskeletal 1 OS=Homo sapiens GN=KRT1 PE=1 SV=6	64.1493	31.57	16	18	17.0576	12.75	5	5	643	65.8469	8.11865
G5ED46	CAlSYntenin/Alcadein homolog OS=Caenorhabditis elegans GN=casy-1 PE=1 SV=1 - [G5ED46_CAEEL]					17.0395	6.1	5	5	984	109.192	5.10986
Q9U3K5	Innexin-2 OS=Caenorhabditis elegans GN=inx-2 PE=2 SV=2 - [INX2_CAEEL]					16.9886	14.32	5	5	419	48.8506	7.04932
46849958	immunoglobulin kappa light chain variable region [Oryctolagus cuniculus]	32.5489	36.11	2	6	16.8218	36.11	2	3	108	11.0643	4.89404
P61866	60S ribosomal protein L12 OS=Caenorhabditis elegans GN=rpl-12 PE=3 SV=1 - [RL12_CAEEL]	5.60766	12.73	2	2	16.54	29.7	4	5	165	17.8198	9.42236
G5EEB4	SZY-20B OS=Caenorhabditis elegans GN=szy-20 PE=1 SV=1 - [G5EEB4_CAEEL]					15.9567	7.22	4	4	457	52.2812	8.67529
Q9GRY9	Uncharacterized protein OS=Caenorhabditis elegans GN=CELE_Y59A8B.10 PE=1 SV=1 - [Q9GRY9_CAEEL]					15.8544	12.11	3	4	413	42.0892	6.65381
O01868	60S ribosomal protein L24 OS=Caenorhabditis elegans GN=rpl-24.1 PE=3 SV=1 - [RL24_CAEEL]	6.02028	11.95	2	2	15.6693	27.04	5	5	159	17.769	11.2681
O01692	40S ribosomal protein S17 OS=Caenorhabditis elegans GN=rps-17 PE=3 SV=2 - [RS17_CAEEL]	7.23567	33.08	3	3	15.5027	33.08	4	4	130	14.9288	9.84717
Q18787	26S protease regulatory subunit 7 OS=Caenorhabditis elegans GN=rpt-1 PE=1 SV=1 - [PRS7_CAEEL]	0	5.98	2	2	15.3068	8.97	4	4	435	48.58	6.48096
Q19579	Polyadenylate-binding protein OS=Caenorhabditis elegans GN=pab-2 PE=1 SV=1 - [Q19579_CAEEL]					15.2807	9.25	6	6	692	75.9339	9.0708
Q17796	Hepatocyte Growth factor-Regulated TK Substrate (HRS) family OS=Caenorhabditis elegans GN=hgrs-1 PE=1 SV=2 - [Q17796_CAEEL]					15.1402	6.86	4	4	729	83.2989	6.41748
Q21902	DNA replication licensing factor mcm-5 OS=Caenorhabditis elegans GN=mcm-5 PE=3 SV=1 - [MCM5_CAEEL]					14.9776	10.14	6	6	759	84.8821	8.80713
Q22498	Probable coatomer subunit gamma OS=Caenorhabditis elegans GN=T14G10.5 PE=3 SV=1 - [COPG_CAEEL]					14.7333	7.24	4	4	870	96.2414	5.5542
Q9XW17	Cytokinesis, Apoptosis, RNA-associated OS=Caenorhabditis elegans GN=car-1 PE=1 SV=1 - [Q9XW17_CAEEL]	7.3838	7.06	2	2	14.6146	16.47	4	4	340	37.5875	9.17334
G5EC91	DumPY: shorter than wild-type OS=Caenorhabditis elegans GN=dpy-11 PE=1 SV=1 - [G5EC91_CAEEL]					14.5068	22.36	5	5	246	27.3642	9.12939
Q9U238	TRanslocon-Associated Protein OS=Caenorhabditis elegans GN=trap-4 PE=1 SV=1 - [Q9U238_CAEEL]					14.4281	32.7	3	3	159	17.4049	7.35693
Q9N4H7	Coatomer subunit alpha OS=Caenorhabditis elegans GN=copa-1 PE=1 SV=2 - [Q9N4H7_CAEEL]					14.3797	3.9	3	3	1232	137.62	6.65381
Q27389	60S ribosomal protein L13a OS=Caenorhabditis elegans GN=rpl-16 PE=2 SV=1 - [RL13A_CAEEL]	4.96435	10.4	2	2	14.1838	26.24	5	6	202	22.9797	10.7554
119370332	RecName: Full=Complement C3; AltName: Full=C3 and PZP-like alpha-2-macroglobulin domain-containing protein 1; Contains: RecName: Full=Complement C3 beta chain; Contains: RecName: Full=Complement C3 alpha chain; Contains: RecName: Full=C3a anaphylatoxin; Contains: RecName: Full=Acylation stimulating protein; Short=ASP; AltName: Full=C3adesArg; Contains: RecName: Full=Complement C3b alpha' chain; C…					13.956	3.19	5	5	1663	187.03	6.40479
Q20647	60S ribosomal protein L23a 2 OS=Caenorhabditis elegans GN=rpl-25.2 PE=3 SV=1 - [R23A2_CAEEL]	7.09773	17.81	2	2	13.8118	17.81	2	3	146	16.2731	10.5649
Q9U1Q4	Valine--tRNA ligase OS=Caenorhabditis elegans GN=vrs-2 PE=1 SV=1 - [SYV_CAEEL]					13.7394	6.38	5	5	1050	118.846	6.69775
P11141	Heat shock 70 kDa protein F, mitochondrial OS=Caenorhabditis elegans GN=hsp-6 PE=1 SV=2 - [HSP7F_CAEEL]	4.25641	3.2	2	2	13.7065	9.28	5	5	657	70.8007	6.20166
Q9U2Z1	Yeast SEC homolog OS=Caenorhabditis elegans GN=sec-23 PE=1 SV=2 - [Q9U2Z1_CAEEL]					13.6829	7.19	3	3	821	89.6188	7.21045
Q04908	26S proteasome non-ATPase regulatory subunit 3 OS=Caenorhabditis elegans GN=rpn-3 PE=1 SV=1 - [PSMD3_CAEEL]					13.2764	12.5	4	4	504	57.4708	7.48877
Q9TYY8	Ubiquitin carboxyl-terminal hydrolase OS=Caenorhabditis elegans GN=CELE_H34C03.2 PE=1 SV=1 - [Q9TYY8_CAEEL]					13.2671	5.78	4	4	900	102.581	5.75732
P91918	Probable small nuclear ribonucleoprotein-associated protein B OS=Caenorhabditis elegans GN=snr-2 PE=3 SV=1 - [RSMB_CAEEL]					13.1318	32.5	3	3	160	16.7305	9.99365
Q20053	ATP Synthase B homolog OS=Caenorhabditis elegans GN=asb-1 PE=1 SV=1 - [Q20053_CAEEL]					12.933	15.28	5	5	301	34.3466	8.85107
Q20363	Stress-induced protein 1 OS=Caenorhabditis elegans GN=sip-1 PE=1 SV=1 - [SIP1_CAEEL]					12.9041	23.27	3	4	159	17.8279	8.08936
Q11190	Electron transfer flavoprotein-ubiquinone oxidoreductase, mitochondrial OS=Caenorhabditis elegans GN=let-721 PE=3 SV=2 - [ETFD_CAEEL]					12.9026	10.39	4	4	597	65.2943	6.72705
O16517	ATP synthase subunit OS=Caenorhabditis elegans GN=atp-4 PE=1 SV=1 - [O16517_CAEEL]					12.6974	40.31	4	4	129	13.9484	9.49561
G5ED20	Tandem Array expression Modifier OS=Caenorhabditis elegans GN=tam-1 PE=1 SV=1 - [G5ED20_CAEEL]					12.6177	5.83	3	3	944	106.682	5.42725
P51404	40S ribosomal protein S13 OS=Caenorhabditis elegans GN=rps-13 PE=3 SV=2 - [RS13_CAEEL]					12.5733	21.19	4	4	151	17.3055	10.7114
P37165	Ubiquitin-like protein 1-40S ribosomal protein S27a OS=Caenorhabditis elegans GN=ubl-1 PE=1 SV=2 - [RS27A_CAEEL]					12.5119	23.31	2	2	163	18.0866	9.5249
Q9XVE9	Ribosomal Protein, Large subunit OS=Caenorhabditis elegans GN=rpl-14 PE=1 SV=1 - [Q9XVE9_CAEEL]					12.4695	26.67	4	4	135	15.3427	11.2681
P47208	T-complex protein 1 subunit delta OS=Caenorhabditis elegans GN=cct-4 PE=2 SV=1 - [TCPD_CAEEL]					12.3498	9.07	3	3	540	58.3544	6.55127
O45499	40S ribosomal protein S26 OS=Caenorhabditis elegans GN=rps-26 PE=3 SV=1 - [RS26_CAEEL]					12.3014	30.77	3	3	117	13.241	11.1069
Q9BKU4	Mitochondrial prohibitin complex protein 1 OS=Caenorhabditis elegans GN=phb-1 PE=1 SV=1 - [PHB1_CAEEL]	4.93718	9.45	2	2	12.29	14.91	3	3	275	29.97	7.56201
Q93714	Probable isocitrate dehydrogenase [NAD] subunit alpha, mitochondrial OS=Caenorhabditis elegans GN=idha-1 PE=3 SV=3 - [IDH3A_CAEEL]					12.1762	13.97	3	3	358	38.4418	7.38623
H2KAQ0	Uncharacterized protein OS=Caenorhabditis elegans GN=mel-46 PE=1 SV=1 - [H2KAQ0_CAEEL]					11.9837	10.03	5	5	728	83.35	5.30029
A7LPI7	Uncharacterized protein OS=Caenorhabditis elegans GN=C24H11.5 PE=1 SV=1 - [A7LPI7_CAEEL]					11.9613	46.74	4	4	92	10.2313	8.1626
Q9GZH4	Dolichyl-diphosphooligosaccharide--protein glycosyltransferase subunit 1 OS=Caenorhabditis elegans GN=ribo-1 PE=3 SV=2 - [RPN1_CAEEL]					11.9219	8.19	4	4	586	65.6965	6.93213
Q9BPN8	Uncharacterized protein Y92H12BR.3 OS=Caenorhabditis elegans GN=Y92H12BR.3 PE=1 SV=2 - [Y92H3_CAEEL]					11.8587	7.22	4	4	637	71.041	5.49072
P41988	T-complex protein 1 subunit alpha OS=Caenorhabditis elegans GN=cct-1 PE=3 SV=2 - [TCPA_CAEEL]	3.87946	3.46	2	2	11.8254	7.1	4	4	549	58.7663	6.49365
O17570	60S ribosomal protein L38 OS=Caenorhabditis elegans GN=rpl-38 PE=3 SV=2 - [RL38_CAEEL]					11.4301	54.29	4	4	70	8.07161	10.0522
Q18990	PYRimidine biosynthesis OS=Caenorhabditis elegans GN=pyr-1 PE=1 SV=2 - [Q18990_CAEEL]					11.3833	2.55	4	4	2198	242.428	6.41748
127517	RecName: Full=Ig mu chain C region secreted form	20.3573	11.35	4	5	11.337	8.73	3	4	458	49.8657	6.32861
O01869	Ribosomal Protein, Small subunit OS=Caenorhabditis elegans GN=rps-10 PE=1 SV=1 - [O01869_CAEEL]					11.3203	26.85	3	3	149	16.8599	9.37842
P91283	ATP synthase subunit OS=Caenorhabditis elegans GN=atp-3 PE=1 SV=1 - [P91283_CAEEL]					11.0814	12.56	3	3	207	22.3761	9.81787
P34560	Regulator of microtubule dynamics protein 1 OS=Caenorhabditis elegans GN=rmd-1 PE=1 SV=2 - [RMD1_CAEEL]					11.0632	19.47	3	3	226	25.876	6.03662
P52819	60S ribosomal protein L22 OS=Caenorhabditis elegans GN=rpl-22 PE=1 SV=3 - [RL22_CAEEL]	9.82157	26.92	3	3	10.8511	26.92	3	3	130	14.9371	9.80322
Q9N358	T-complex protein 1 subunit theta OS=Caenorhabditis elegans GN=cct-8 PE=1 SV=3 - [TCPQ_CAEEL]					10.7503	6.57	3	3	548	59.6957	6.17627
6653413	immunoglobulin light chain VJ kappa region [Oryctolagus cuniculus]	19.8241	26.67	3	4	10.6228	25.19	2	2	135	14.2772	8.44092
G5EDE8	ERGIC-53-like protein OS=Caenorhabditis elegans GN=ile-1 PE=1 SV=1 - [G5EDE8_CAEEL]					10.4698	9.55	2	2	492	54.9436	6.55127
Q95PZ1	Uncharacterized protein OS=Caenorhabditis elegans GN=CELE_Y67H2A.5 PE=1 SV=1 - [Q95PZ1_CAEEL]					10.3443	24.83	2	2	145	15.5043	9.51025
Q9NAL4	Mediator of RNA polymerase II transcription subunit 17 OS=Caenorhabditis elegans GN=mdt-17 PE=3 SV=4 - [MED17_CAEEL]					10.3356	7.35	3	3	667	76.9688	6.03662
Q9TZ65	Uncharacterized protein OS=Caenorhabditis elegans GN=CELE_F56F11.4 PE=1 SV=2 - [Q9TZ65_CAEEL]					10.3256	11.68	4	4	411	45.661	8.6167
21262877	immunoglobulin kappa light chain VkJk region [Oryctolagus cuniculus]	23.5671	26.13	2	6	10.3197	26.13	2	3	111	11.6706	4.95752
Q03577	Aspartate--tRNA ligase, cytoplasmic OS=Caenorhabditis elegans GN=drs-1 PE=3 SV=1 - [SYDC_CAEEL]					10.1958	10.55	4	4	531	59.9015	6.44287
P02769	cRAP ALBU_BOVIN Serum albumin OS=Bos taurus GN=ALB PE=1 SV=4	24.8293	7.25	4	7	10.1053	5.27	3	3	607	69.2484	6.17627
Q23368	Yeast SEC homolog OS=Caenorhabditis elegans GN=sec-24.2 PE=1 SV=3 - [Q23368_CAEEL]					9.95791	4.17	3	3	984	109.277	7.81104
P29691	Elongation factor 2 OS=Caenorhabditis elegans GN=eef-2 PE=2 SV=4 - [EF2_CAEEL]					9.91661	5.28	4	4	852	94.7354	6.52197
P90735	Sodium/potassium-transporting ATPase subunit alpha OS=Caenorhabditis elegans GN=eat-6 PE=1 SV=1 - [P90735_CAEEL]					9.84587	3.92	3	3	996	110.932	5.52881
O01808	UBR E3 ubiquitin ligase homolog OS=Caenorhabditis elegans GN=ubr-4 PE=1 SV=3 - [O01808_CAEEL]					9.79629	1.07	3	3	4213	480.389	6.31592
G5EBZ4	Protein let-418 OS=Caenorhabditis elegans GN=let-418 PE=1 SV=1 - [LE418_CAEEL]					9.70787	2.52	4	4	1829	209.02	5.19873
O44782	Major sperm protein OS=Caenorhabditis elegans GN=vpr-1 PE=1 SV=1 - [O44782_CAEEL]					9.68298	17.55	2	3	245	26.8348	7.10791
Q9GRZ9	Transmembrane and Coiled-Coil protein OS=Caenorhabditis elegans GN=tcc-1 PE=1 SV=1 - [Q9GRZ9_CAEEL]					9.60698	6.21	3	3	676	75.8455	6.94678
P91027	Calponin Homology Domain containing Protein OS=Caenorhabditis elegans GN=chdp-1 PE=1 SV=1 - [P91027_CAEEL]	25.455	33.14	5	5	9.54081	9.76	2	2	338	35.8944	4.83057
Q09289	Proteasomal ubiquitin receptor ADRM1 homolog OS=Caenorhabditis elegans GN=C56G2.7 PE=3 SV=2 - [ADRM1_CAEEL]					9.44678	10.7	3	3	374	39.7485	4.91943
Q86S29	Chaperonin Containing TCP-1 OS=Caenorhabditis elegans GN=cct-7 PE=1 SV=1 - [Q86S29_CAEEL]					9.43203	8.35	3	3	455	49.8157	5.70654
27373881	antibody variable domain [Oryctolagus cuniculus]					9.40505	50	3	3	112	11.8977	4.83057
G5EC37	Suppressor of Ectopic P granules in Autophagy mutant OS=Caenorhabditis elegans GN=sepa-1 PE=1 SV=1 - [G5EC37_CAEEL]					9.374	6.27	4	4	702	80.2113	5.61768
Q18115	26S proteasome non-ATPase regulatory subunit 1 OS=Caenorhabditis elegans GN=rpn-2 PE=3 SV=4 - [PSMD1_CAEEL]					9.37163	3.83	3	3	965	105.941	7.63525
Q20678	Exocyst complex component 1 OS=Caenorhabditis elegans GN=sec-3 PE=1 SV=2 - [EXOC1_CAEEL]					9.37003	4.25	3	3	848	97.2359	6.44287
Q7Z121	C-type LECtin OS=Caenorhabditis elegans GN=clec-266 PE=1 SV=1 - [Q7Z121_CAEEL]					9.35105	24.83	3	3	145	16.9723	6.66846
Q95XR0	Uncharacterized protein OS=Caenorhabditis elegans GN=CELE_Y39G10AR.8 PE=1 SV=1 - [Q95XR0_CAEEL]					9.26355	9.59	3	3	469	51.2019	8.74854
Q9U1X9	Ribosomal protein, Large subunit, Acidic (P1) OS=Caenorhabditis elegans GN=rla-2 PE=1 SV=1 - [Q9U1X9_CAEEL]					9.22056	50.91	3	3	110	10.8645	4.56396
Q95QV7	TIA-1/TIAL RNA binding protein homolog OS=Caenorhabditis elegans GN=tiar-1 PE=1 SV=1 - [Q95QV7_CAEEL]	22.6615	27.13	7	8	9.187	9.84	3	3	376	41.5696	6.7417
P90866	Cyclin-dependent kinase 8 OS=Caenorhabditis elegans GN=cdk-8 PE=3 SV=4 - [CDK8_CAEEL]					9.15266	5.44	3	3	588	67.7404	9.18799
Q94051	Caveolin-1 OS=Caenorhabditis elegans GN=cav-1 PE=2 SV=1 - [CAV1_CAEEL]					9.06798	13.19	2	3	235	26.2746	5.46533
Q9N5V3	IMportin Beta family OS=Caenorhabditis elegans GN=imb-3 PE=1 SV=2 - [Q9N5V3_CAEEL]					9.02097	3.66	3	3	1092	121.954	4.71631
S5ZDJ9	NTL-1b OS=Caenorhabditis elegans GN=ntl-1 PE=2 SV=1 - [S5ZDJ9_CAEEL]					8.98391	1.87	3	3	1875	208.49	7.75244
H2KZE4	Uncharacterized protein OS=Caenorhabditis elegans GN=C53B7.3 PE=1 SV=1 - [H2KZE4_CAEEL]					8.92579	13.38	2	2	269	29.1079	7.85498
B7WN95	Ribosomal Protein, Large subunit OS=Caenorhabditis elegans GN=rpl-32 PE=1 SV=1 - [B7WN95_CAEEL]					8.92416	38.27	3	3	81	9.09385	9.99365
Q18853	CYtochrome C OS=Caenorhabditis elegans GN=cyc-1 PE=1 SV=1 - [Q18853_CAEEL]					8.89693	15.09	2	3	285	30.9477	8.57275
Q9U1W1	TFG related OS=Caenorhabditis elegans GN=tfg-1 PE=1 SV=1 - [Q9U1W1_CAEEL]					8.66962	8.44	2	2	486	49.7087	5.64307
Q95ZS5	Uncharacterized protein OS=Caenorhabditis elegans GN=CELE_F56A8.3 PE=1 SV=1 - [Q95ZS5_CAEEL]					8.59636	8.78	3	4	444	49.3779	9.64209
B5U8N2	Reticulon-like protein OS=Caenorhabditis elegans GN=ret-1 PE=1 SV=1 - [B5U8N2_CAEEL]					8.57374	7.09	2	2	494	54.4828	4.91943
P49196	40S ribosomal protein S12 OS=Caenorhabditis elegans GN=rps-12 PE=3 SV=2 - [RS12_CAEEL]					8.5596	20	2	2	140	15.0595	6.65381
A3QMC5	Ribosomal Protein, Large subunit OS=Caenorhabditis elegans GN=rpl-34 PE=1 SV=1 - [A3QMC5_CAEEL]					8.46793	30	3	3	110	12.6742	11.3413
P55326	Uncharacterized protein F13E6.1 OS=Caenorhabditis elegans GN=F13E6.1 PE=3 SV=2 - [YZG1_CAEEL]					8.44391	15.9	2	2	195	21.2739	5.77002
Q03570	Mediator of RNA polymerase II transcription subunit 14 OS=Caenorhabditis elegans GN=rgr-1 PE=3 SV=6 - [MED14_CAEEL]					8.21049	2.04	3	3	1516	170.291	7.26904
Q9XTI0	Probable 3-hydroxyisobutyrate dehydrogenase, mitochondrial OS=Caenorhabditis elegans GN=B0250.5 PE=3 SV=1 - [3HIDH_CAEEL]	4.4919	7.02	2	2	8.12179	11.37	3	3	299	31.1969	8.04541
Q17348	Small nuclear ribonucleoprotein Sm D3 OS=Caenorhabditis elegans GN=snr-1 PE=2 SV=2 - [SMD3_CAEEL]					8.03591	13.97	2	3	136	14.8026	10.814
Q93535	Uncharacterized protein OS=Caenorhabditis elegans GN=CELE_F20D1.3 PE=1 SV=2 - [Q93535_CAEEL]					8.01068	9.94	2	4	463	50.7745	5.51611
P48158	60S ribosomal protein L23 OS=Caenorhabditis elegans GN=rpl-23 PE=3 SV=1 - [RL23_CAEEL]	4.70537	11.43	2	2	7.93781	19.29	3	3	140	14.945	10.5356
Q19057	Acyl CoA DeHydrogenase OS=Caenorhabditis elegans GN=acdh-12 PE=1 SV=1 - [Q19057_CAEEL]					7.86322	4.89	3	3	613	66.13	8.44092
Q9XXI9	DNA helicase OS=Caenorhabditis elegans GN=mcm-2 PE=1 SV=1 - [Q9XXI9_CAEEL]					7.77032	3.97	3	3	881	99.2602	5.09717
Q19969	Importin subunit alpha-3 OS=Caenorhabditis elegans GN=ima-3 PE=1 SV=2 - [IMA3_CAEEL]					7.75521	6.81	2	2	514	56.1275	4.83057
G3MU81	Ubiquitin carboxyl-terminal hydrolase OS=Caenorhabditis elegans GN=math-33 PE=1 SV=1 - [G3MU81_CAEEL]					7.72805	3.01	2	2	1129	130.871	5.69385
O17694	RNAi-Induced Longevity OS=Caenorhabditis elegans GN=ril-1 PE=1 SV=1 - [O17694_CAEEL]	7.75987	21.58	2	2	7.61629	26.62	3	3	139	16.4845	9.53955
O16368	Probable 26S protease regulatory subunit 4 OS=Caenorhabditis elegans GN=rpt-2 PE=3 SV=1 - [PRS4_CAEEL]					7.60108	6.77	3	3	443	49.6917	6.16357
Q86B39	Protein argonaute OS=Caenorhabditis elegans GN=alg-2 PE=1 SV=1 - [Q86B39_CAEEL]					7.5544	3.25	2	2	891	99.4627	8.98291
Q9XUS2	Mediator of RNA polymerase II transcription subunit 29 OS=Caenorhabditis elegans GN=mdt-29 PE=1 SV=1 - [MED29_CAEEL]					7.41859	6.35	2	2	441	48.2555	7.38623
Q9U329	Uncharacterized protein OS=Caenorhabditis elegans GN=CELE_W09C5.8 PE=1 SV=1 - [Q9U329_CAEEL]					7.20972	15.43	2	2	175	20.2444	8.32373
109272	Ig heavy chain precursor VH3-A3 region - rabbit (fragment)	17.6699	22.03	2	4	7.07429	22.03	2	2	118	12.8274	8.35303
Q23089	EXPOrtin (Nuclear export receptor) OS=Caenorhabditis elegans GN=xpo-1 PE=1 SV=2 - [Q23089_CAEEL]					7.06581	2.78	2	2	1080	123.776	5.24951
Q22037	Heterogeneous nuclear ribonucleoprotein A1 OS=Caenorhabditis elegans GN=hrp-1 PE=1 SV=1 - [ROA1_CAEEL]	13.6073	15.03	4	4	6.93673	8.38	2	2	346	36.3212	8.35303
Q9N3F7	Uncharacterized protein OS=Caenorhabditis elegans GN=CELE_Y53G8AR.9 PE=1 SV=1 - [Q9N3F7_CAEEL]					6.92417	12.38	3	3	315	35.0545	7.7085
Q11117	LAMP family protein lmp-1 OS=Caenorhabditis elegans GN=lmp-1 PE=2 SV=1 - [LMP1_CAEEL]					6.86033	10.97	2	2	237	25.776	5.36377
21262831	immunoglobulin kappa light chain VkJk region [Oryctolagus cuniculus]	20.0888	23.64	3	6	6.84852	21.82	2	2	110	11.3966	8.646
Q95Y04	40S ribosomal protein S28 OS=Caenorhabditis elegans GN=rps-28 PE=3 SV=1 - [RS28_CAEEL]					6.71715	33.85	2	2	65	7.43203	10.7114
Q23523	Mediator of RNA polymerase II transcription subunit 4 OS=Caenorhabditis elegans GN=mdt-4 PE=3 SV=2 - [MED4_CAEEL]					6.59919	9.58	2	2	334	36.6397	7.18115
P90789	NADH dehydrogenase [ubiquinone] 1 beta subcomplex subunit 7 OS=Caenorhabditis elegans GN=D2030.4 PE=3 SV=1 - [NDUB7_CAEEL]					6.57255	26.83	2	2	123	14.3991	8.17725
Q19869	60S ribosomal protein L26 OS=Caenorhabditis elegans GN=rpl-26 PE=3 SV=1 - [RL26_CAEEL]	6.5762	23.24	3	3	6.5515	34.51	4	4	142	16.0649	11.2827
Q65ZK5	Prolyl Amino-acyl tRNA Synthetase OS=Caenorhabditis elegans GN=pars-1 PE=1 SV=1 - [Q65ZK5_CAEEL]					6.45443	5.95	2	2	454	51.5542	7.51807
Q8I4M5	Germline survival defective-1 OS=Caenorhabditis elegans GN=gls-1 PE=1 SV=2 - [GLS1_CAEEL]					6.30635	2.95	2	2	1052	115.943	8.23584
G5EFG4	ABC transporter, class F OS=Caenorhabditis elegans GN=abcf-2 PE=1 SV=1 - [G5EFG4_CAEEL]					6.13871	4.18	2	2	622	70.3348	6.771
G3MU88	Yeast SEC homolog OS=Caenorhabditis elegans GN=sec-61 PE=1 SV=1 - [G3MU88_CAEEL]					6.12212	4.75	2	2	442	48.5102	7.62061
D5SGZ9	MeDiaTor OS=Caenorhabditis elegans GN=mdt-9 PE=1 SV=1 - [D5SGZ9_CAEEL]					5.9852	31.86	3	3	113	12.6797	5.66846
Q6A582	Zipcode Binding Protein homolog OS=Caenorhabditis elegans GN=zbp-1 PE=1 SV=1 - [Q6A582_CAEEL]					5.93711	3.41	2	2	704	78.286	9.24658
Q93235	Sodium/potassium-transporting ATPase subunit beta-1 OS=Caenorhabditis elegans GN=nkb-1 PE=1 SV=1 - [AT1B1_CAEEL]					5.84859	13.13	2	2	320	36.6484	7.57666
G5EFC1	RAB family OS=Caenorhabditis elegans GN=rab-8 PE=1 SV=1 - [G5EFC1_CAEEL]					5.83135	11.37	2	2	211	24.0072	7.82568
Q95XN0	LIN-65L OS=Caenorhabditis elegans GN=lin-65 PE=1 SV=2 - [Q95XN0_CAEEL]					5.82796	3.3	2	2	728	80.2827	4.70361
Q19459	Golgi apparatus protein 1 homolog OS=Caenorhabditis elegans GN=F14E5.2 PE=1 SV=1 - [GSLG1_CAEEL]					5.81885	2.87	2	2	1149	131.583	6.13818
Q9U2D9	Glycogen [starch] synthase OS=Caenorhabditis elegans GN=gsy-1 PE=1 SV=1 - [GYS_CAEEL]					5.72314	3.13	2	2	672	76.4101	6.25244
Q19324	Proteasome Regulatory Particle, Non-ATPase-like OS=Caenorhabditis elegans GN=rpn-5 PE=1 SV=1 - [Q19324_CAEEL]					5.5981	7.76	2	3	490	56.4207	8.44092
Q9UAN9	Nicotinic Receptor Associated OS=Caenorhabditis elegans GN=nra-4 PE=1 SV=2 - [Q9UAN9_CAEEL]					5.4033	2.59	2	2	1121	121.584	7.43018
P50093	Mitochondrial prohibitin complex protein 2 OS=Caenorhabditis elegans GN=phb-2 PE=1 SV=2 - [PHB2_CAEEL]					5.33453	7.82	2	2	294	32.6473	9.74463
V6CKP0	EXPOrtin (Nuclear export receptor) OS=Caenorhabditis elegans GN=xpo-2 PE=1 SV=1 - [V6CKP0_CAEEL]					5.32577	11.28	2	2	195	21.515	7.69385
G5EDY2	Tryptophanyl(W) Amino-acyl tRNA Synthetase OS=Caenorhabditis elegans GN=wars-1 PE=1 SV=1 - [G5EDY2_CAEEL]					5.20706	5.04	2	2	417	47.208	6.46826
O17732	Pyruvate carboxylase 1 OS=Caenorhabditis elegans GN=pyc-1 PE=1 SV=1 - [PYC1_CAEEL]					4.95989	3.74	3	3	1175	129.204	6.99072
P04255	Histone H2B 1 OS=Caenorhabditis elegans GN=his-11 PE=1 SV=4 - [H2B1_CAEEL]					4.95116	15.57	2	2	122	13.4923	10.4038
P34652	Calnexin OS=Caenorhabditis elegans GN=cnx-1 PE=1 SV=1 - [CALX_CAEEL]					4.88956	6.95	3	3	619	69.1646	4.64014
Q20168	Probable coatomer subunit beta' OS=Caenorhabditis elegans GN=copb-2 PE=3 SV=3 - [COPB2_CAEEL]					4.7742	3.2	3	3	1000	111.038	5.09717
Q9N4J8	T-complex protein 1 subunit gamma OS=Caenorhabditis elegans GN=cct-3 PE=3 SV=3 - [TCPG_CAEEL]					4.77333	4.24	2	2	543	60.4187	7.85498
Q9U1W0	DNaJ domain (Prokaryotic heat shock protein) OS=Caenorhabditis elegans GN=dnj-29 PE=1 SV=1 - [Q9U1W0_CAEEL]					4.72518	4.49	2	2	579	66.8334	8.20654
A8WIR1	Ribosomal Protein, Small subunit OS=Caenorhabditis elegans GN=rps-22 PE=1 SV=1 - [A8WIR1_CAEEL]	4.05804	16.83	2	2	4.71455	23.76	3	3	101	11.5383	9.99365
Q20779	Probable cytochrome c oxidase subunit 6A, mitochondrial OS=Caenorhabditis elegans GN=tag-174 PE=3 SV=1 - [COX6A_CAEEL]					4.65601	26.56	2	2	128	14.7334	9.53955
Q95Q17	Mediator of RNA polymerase II transcription subunit 7 OS=Caenorhabditis elegans GN=let-49 PE=1 SV=1 - [MED7_CAEEL]					4.63987	11.16	2	2	251	28.8698	6.01123
P09588	Histone H2A OS=Caenorhabditis elegans GN=his-3 PE=1 SV=2 - [H2A_CAEEL]	4.34179	12.6	2	2	4.49969	12.6	2	2	127	13.3965	10.6968
Q9N3H3	Uncharacterized protein OS=Caenorhabditis elegans GN=CELE_Y53G8AL.2 PE=1 SV=2 - [Q9N3H3_CAEEL]					4.47953	4.87	2	2	431	48.2236	9.18799
Q22099	Lysine--tRNA ligase OS=Caenorhabditis elegans GN=krs-1 PE=3 SV=1 - [SYK_CAEEL]					4.44639	3.15	2	2	572	65.0952	6.06201
Q22706	Exocyst complex component 2 OS=Caenorhabditis elegans GN=sec-5 PE=3 SV=1 - [EXOC2_CAEEL]					4.41697	4.07	3	3	884	100.351	5.97314
O76371	Proteasome Regulatory Particle, ATPase-like OS=Caenorhabditis elegans GN=rpt-5 PE=1 SV=1 - [O76371_CAEEL]					4.39137	6.28	2	2	430	48.0958	5.2876
P90795	Probable glycerol-3-phosphate dehydrogenase, mitochondrial OS=Caenorhabditis elegans GN=T25G3.4 PE=3 SV=2 - [GPDM_CAEEL]					4.37799	2.63	2	2	722	80.7567	8.32373
O16298	Uncharacterized protein OS=Caenorhabditis elegans GN=hpo-18 PE=1 SV=1 - [O16298_CAEEL]					4.3471	33.33	2	2	54	6.01826	10.1694
Q9GZE9	Lipid DroPlet localized protein OS=Caenorhabditis elegans GN=ldp-1 PE=1 SV=1 - [Q9GZE9_CAEEL]					4.22644	6.81	2	2	426	47.2641	8.44092
O62431	Probable glutamine--tRNA ligase OS=Caenorhabditis elegans GN=ers-1 PE=3 SV=1 - [SYQ_CAEEL]					4.13367	3.18	3	3	786	88.2069	7.69385
P41932	14-3-3-like protein 1 OS=Caenorhabditis elegans GN=par-5 PE=1 SV=2 - [14331_CAEEL]					4.04148	6.85	2	2	248	28.1731	4.80518
Q23315	Glutamyl(E) Amino-acyl tRNA Synthetase OS=Caenorhabditis elegans GN=ears-1 PE=1 SV=1 - [Q23315_CAEEL]					3.93119	1.48	2	2	1149	125.12	8.70459
P90983	Ribosomal Protein, Small subunit OS=Caenorhabditis elegans GN=rps-29 PE=1 SV=2 - [P90983_CAEEL]					3.90314	14.29	2	2	56	6.5493	10.1694
G5EE12	CKA And Striatin Homolog OS=Caenorhabditis elegans GN=cash-1 PE=1 SV=1 - [G5EE12_CAEEL]					3.72492	4.28	2	2	678	75.1909	5.23682
D3YT56	Methionyl Amino-acyl tRNA Synthetase OS=Caenorhabditis elegans GN=mars-1 PE=1 SV=1 - [D3YT56_CAEEL]					3.42818	8.16	2	2	294	31.8218	8.646
H8ESF4	SWI/SNF nucleosome remodeling complex component OS=Caenorhabditis elegans GN=swsn-1 PE=1 SV=1 - [H8ESF4_CAEEL]					3.26466	3.8	2	2	685	73.9214	5.79541
P13645	cRAP K1C10_HUMAN Keratin, type I cytoskeletal 10 OS=Homo sapiens GN=KRT10 PE=1 SV=6	50.0286	23.27	15	15	3.14473	4.38	2	2	593	59.4829	5.21143
G5EFX8	NOT-Like (Yeast CCR4/NOT complex component) OS=Caenorhabditis elegans GN=ntl-3 PE=1 SV=1 - [G5EFX8_CAEEL]					3.08514	3.28	2	2	701	78.2321	5.89697
Q22624	Uncharacterized protein OS=Caenorhabditis elegans GN=CELE_T21B10.3 PE=1 SV=2 - [Q22624_CAEEL]					2.52772	2.56	2	2	1170	135.448	6.44287
Q09543	Probable serine/threonine-protein phosphatase PP2A regulatory subunit OS=Caenorhabditis elegans GN=paa-1 PE=1 SV=2 - [2AAA_CAEEL]					2.12547	3.05	2	2	590	66.1068	5.21143
P34540	Kinesin heavy chain OS=Caenorhabditis elegans GN=unc-116 PE=2 SV=2 - [KINH_CAEEL]					1.95279	1.84	2	2	815	91.8371	6.40479
Q22528	Uncharacterized protein OS=Caenorhabditis elegans GN=ekl-6 PE=1 SV=3 - [Q22528_CAEEL]					1.91861	1.56	2	2	964	110.934	6.20166
Q09657	Uncharacterized protein OS=Caenorhabditis elegans GN=CELE_ZK1320.9 PE=1 SV=1 - [Q09657_CAEEL]					1.73051	4.03	2	2	472	51.3373	8.6167
Q22053	rRNA 2'-O-methyltransferase fibrillarin OS=Caenorhabditis elegans GN=fib-1 PE=3 SV=1 - [FBRL_CAEEL]					1.69293	3.98	2	2	352	36.3607	10.2573
Q5WRT9	Nuclear Pore complex Protein OS=Caenorhabditis elegans GN=npp-21 PE=1 SV=1 - [Q5WRT9_CAEEL]	136.991	21.99	32	34					1987	223.8	4.86865
20664303	Chain A, Fc Fragment Of Rituximab Bound To A Minimized Version Of The B-Domain From Protein A Called Z34c	48.3938	13.04	3	24					207	23.5029	7.44482
10334573	immunoglobulin heavy chain [Homo sapiens]	25.6332	7.73	3	17					362	39.6367	7.97217
16554039	unnamed protein product [Homo sapiens]	27.7416	2.5	2	15					600	64.729	8.08936
6502717	immunoglobulin kappa light chain variable region, partial [Oryctolagus cuniculus]	28.8458	39.42	2	12					104	10.7861	4.43701
P35908	cRAP K22E_HUMAN Keratin, type II cytoskeletal 2 epidermal OS=Homo sapiens GN=KRT2 PE=1 SV=2	36.4688	17.3	11	12					705	71.3999	8.76318
9799187	IgM heavy chain VDJ region [Oryctolagus cuniculus]	33.5979	41.6	4	9					125	13.0944	6.52197
40805351	immunoglobulin heavy chain VDJ region [Oryctolagus cuniculus]	28.2212	34.69	3	8					98	10.4882	8.67529
165194	immunoglobulin heavy chain VDJ region, partial [Oryctolagus cuniculus]	15.66	21.67	2	6					120	12.7282	7.95752
27373931	antibody variable domain [Oryctolagus cuniculus]	22.7011	37.93	3	5					116	12.3601	5.31299
27373619	antibody variable domain [Oryctolagus cuniculus]	22.9166	36.67	3	5					120	12.8613	6.01123
9799183	IgM heavy chain VDJ region [Oryctolagus cuniculus]	21.756	36.51	3	5					126	13.7167	5.10986
27373945	antibody variable domain [Oryctolagus cuniculus]	21.6019	36.11	2	5					108	11.2977	8.85107
27374175	antibody variable domain [Oryctolagus cuniculus]	18.8858	27.05	3	5					122	13.1494	4.76709
291386357	PREDICTED: antibody variable domain-like [Oryctolagus cuniculus]	27.6106	24.38	2	5					160	16.9713	7.66455
1666746	immunoglobulin IgM heavy chain VDJ region, partial [Oryctolagus cuniculus]	11.7914	23.01	2	5					113	12.0888	6.53662
125736	RecName: Full=Ig kappa chain V region 3315	15.9457	21.74	3	5					115	12.0047	6.44287
P35527	cRAP K1C9_HUMAN Keratin, type I cytoskeletal 9 OS=Homo sapiens GN=KRT9 PE=1 SV=3	16.0267	15.25	5	5					623	62.0919	5.30029
Q19842	Propionyl-CoA carboxylase alpha chain, mitochondrial OS=Caenorhabditis elegans GN=pcca-1 PE=1 SV=1 - [PCCA_CAEEL]	15.408	11.6	5	5					724	79.712	7.73779
9246531	immunoglobulin kappa light chain variable region [Oryctolagus cuniculus]	16.3288	35.45	2	4					110	11.3594	4.42432
27373203	antibody variable domain [Oryctolagus cuniculus]	22.4108	34.82	2	4					112	11.7567	4.71631
21262843	immunoglobulin kappa light chain VkJk region [Oryctolagus cuniculus]	14.4024	27.03	2	4					111	11.3605	6.44287
27373927	antibody variable domain [Oryctolagus cuniculus]	14.4839	21.93	2	4					114	12.2552	8.48486
27373495	antibody variable domain [Oryctolagus cuniculus]	16.9523	20.69	2	4					116	12.3341	7.98682
Q86NF2	BTB/POZ Domain-containing protein homolog OS=Caenorhabditis elegans GN=btbd-10 PE=1 SV=1 - [Q86NF2_CAEEL]	14.9741	18.6	4	4					387	43.7464	6.03662
310053	immunoglobulin heavy chain, partial [Oryctolagus cuniculus]	17.2679	18.57	2	4					140	14.9975	8.88037
Q9XXA2	Microtubule End Binding Protein OS=Caenorhabditis elegans GN=ebp-2 PE=1 SV=1 - [Q9XXA2_CAEEL]	13.0807	14.38	4	4					299	33.0137	5.07178
Q09350	Uncharacterized protein T09B9.4 OS=Caenorhabditis elegans GN=T09B9.4 PE=4 SV=1 - [YRU4_CAEEL]	11.9605	8.9	4	4					528	59.6469	7.00537
440	anti-testosterone antibody [Bos taurus]	15.2933	5.96	2	4					470	50.593	6.52197
9246615	immunoglobulin kappa light chain variable region [Oryctolagus cuniculus]	14.8022	36.11	2	3					108	11.1835	6.44287
10180007	anti-guinea pig C3 single chain variable fragment antibody light chain [synthetic construct]	14.9916	35.14	2	3					111	11.5837	5.24951
6502864	immunoglobulin kappa light chain, partial [Oryctolagus cuniculus]	9.78048	27.68	2	3					112	12.1019	8.26514
291386359	PREDICTED: antibody variable domain-like [Oryctolagus cuniculus]	12.8806	27.68	2	3					112	11.6448	8.92432
27373537	antibody variable domain [Oryctolagus cuniculus]	11.7264	26.85	2	3					108	11.3526	8.48486
9246655	immunoglobulin kappa light chain variable region [Oryctolagus cuniculus]	9.64508	26.13	2	3					111	11.7097	7.82568
40805399	immunoglobulin heavy chain VDJ region [Oryctolagus cuniculus]	11.994	25.51	2	3					98	10.3681	8.29443
6502913	immunoglobulin kappa light chain, partial [Oryctolagus cuniculus]	9.8528	25.44	2	3					114	11.6966	8.48486
125753	RecName: Full=Ig kappa chain V region K29-213	8.70763	23.64	3	3					110	11.5888	8.96826
27373519	antibody variable domain [Oryctolagus cuniculus]	8.32881	20.87	3	3					115	12.5902	5.10986
G8JY24	Protein-L-isoaspartate O-methyltransferase OS=Caenorhabditis elegans GN=pcm-1 PE=1 SV=1 - [G8JY24_CAEEL]	10.0365	17.35	3	3					219	24.1291	6.88818
9246595	immunoglobulin kappa light chain variable region [Oryctolagus cuniculus]	6.60929	14.95	3	3					107	11.0965	7.82568
46849926	immunoglobulin kappa light chain variable region [Oryctolagus cuniculus]	12.4623	36.11	2	2					108	11.3336	5.18604
27373621	antibody variable domain [Oryctolagus cuniculus]	2.82095	36.11	2	2					108	11.0945	7.95752
27373541	antibody variable domain [Oryctolagus cuniculus]	8.2149	36.11	2	2					108	11.1656	7.95752
9246683	immunoglobulin kappa light chain variable region [Oryctolagus cuniculus]	5.90404	34.82	2	2					112	11.7737	5.18604
27374185	antibody variable domain [Oryctolagus cuniculus]	8.50879	31.48	2	2					108	11.3746	4.58936
10180003	anti-guinea pig C3 single chain variable fragment antibody light chain [synthetic construct]	9.52244	30.63	2	2					111	11.6107	6.49365
27373667	antibody variable domain [Oryctolagus cuniculus]	5.20337	30.51	2	2					118	12.407	6.53662
6653411	immunoglobulin light chain VJ kappa region [Oryctolagus cuniculus]	8.11501	28.89	2	2					135	14.1391	7.72314
9246509	immunoglobulin kappa light chain variable region [Oryctolagus cuniculus]	6.3563	26.61	2	2					109	11.4987	6.46826
291406880	PREDICTED: hCG27493-like [Oryctolagus cuniculus]	8.22716	26.21	2	2					145	15.7817	4.91943
27374163	antibody variable domain [Oryctolagus cuniculus]	7.83119	25.21	2	2					119	12.6943	7.98682
439896	immunoglobulin kappa-chain, partial [Oryctolagus cuniculus]	7.29495	23.81	2	2					105	11.2154	4.58936
70798841	immunoglobulin kappa light chain variable region [Homo sapiens]	5.78441	21.5	2	2					107	11.6058	8.48486
37784012	immunoglobulin heavy chain variable region [Oryctolagus cuniculus algirus]	4.14715	18.48	2	2					92	9.83778	5.26221
4378304	immunoglobulin kappa light chain variable region [Homo sapiens]	3.99528	14.55	2	2					110	11.8549	9.40771
A0A0M7RDT5	Uncharacterized protein OS=Caenorhabditis elegans GN=CELE_F37B4.10 PE=1 SV=1 - [A0A0M7RDT5_CAEEL]	4.23632	10.71	2	2					224	25.6019	6.07471
Q09248	Probable dynactin subunit 2 OS=Caenorhabditis elegans GN=dnc-2 PE=1 SV=1 - [DCTN2_CAEEL]	5.24916	7.25	2	2					331	37.1322	5.19873
Q19749	Dihydrolipoyllysine-residue acetyltransferase component of pyruvate dehydrogenase complex, mitochondrial OS=Caenorhabditis elegans GN=dlat-1 PE=1 SV=1 - [ODP2_CAEEL]	5.21641	5.13	2	2					507	53.4336	8.25049
Q9NA98	Actin-Related Proteins OS=Caenorhabditis elegans GN=arp-1 PE=1 SV=2 - [Q9NA98_CAEEL]	4.307	4.81	2	2					374	42.0444	6.7417
Q8WQF1	Propionyl Coenzyme A Carboxylase Beta subunit OS=Caenorhabditis elegans GN=pccb-1 PE=1 SV=1 - [Q8WQF1_CAEEL]	7.18636	4.6	2	2					522	56.911	6.49365
Q19583	Uridine kinase OS=Caenorhabditis elegans GN=CELE_F19B6.1 PE=1 SV=1 - [Q19583_CAEEL]	5.93606	4.27	2	2					515	58.4143	6.44287
88192783	Chain C, Solution Structure Of The Complex Between Immunoglobulin Iga1 And Human Serum Albumin	7.55192	3.59	2	2					585	66.4289	5.96045

## Sheet: MassSpecMethods
Brief description: The affinity purified proteins were reduced, alkylated, and digested with trypsin as previously described1. An aliquot of the desalted peptides was analyzed with an EASY-spray 50cm PepMap C18 column on an EASY-nLC 1000 coupled to a Thermo Fisher Orbitrap Fusion Lumos Mass Spectrometer operated in data dependent mode. The data was searched against the UniProt C. elegans database…
